# Supplementary material for: Transcriptome-wide association study and eQTL colocalization identify potentially causal genes responsible for human bone mineral density GWAS associations
Source: eLife. 2022 Nov 23;11:e77285. doi: 10.7554/eLife.77285 (PMC9683789; doi:10.7554/eLife.77285)
Supplement: Supplementary file 1. — (a) 2156 protein-coding genes that are significant by S-MultiXcan transcriptome-wide association study (TWAS) analysis (Bonferroni p value ≤0.05). Columns are Ensembl ID, gene name, the nominal S-MultiXcan p value, the number of tissues available to S-MultiXcan, the number of independent components of variation among the tissues, and the Bonferroni-adjusted p value. (b) 1182 protein-coding genes that are significant in the fastEnloc colocalization analysis (regional colocalization probability [RCP] ≥0.1). Columns are Ensembl ID, signal cluster name from the expression quantitative trait loci (eQTL) analysis, the gene name, the RCP, and the colocalizing Genotype-Tissue Expression (GTEx) tissue. (c) The 512 protein-coding genes that are significant by both TWAS and colocalization (Bonferroni p value ≤0.05 and RCP ≥0.1). Columns are Ensembl ID, signal cluster name from the eQTL analysis, gene name, the RCP, the colocalizing GTEx tissue, the nominal S-MultiXcan p value, and the Bonferroni-adjusted p value. (d) Number of the 512 significantly colocalizing genes per GTEx tissue. Columns are the GTEx tissue and the number of unique colocalizing eQTL in the relevant tissue. (e) The ‘known bone gene’ list. Columns are gene name and Ensembl ID. (f) The 66 genes that are significant by both TWAS and colocalization (Bonferroni p value ≤0.05 and RCP ≥0.1), and are also members of the ‘known bone gene’ list. Columns are gene name and Ensembl ID. (g) Gene Ontology (GO) enrichments for the 512 protein-coding genes that are significant by both TWAS and colocalization (Bonferroni p value ≤0.05 and RCP ≥0.1). Only GO enrichments with a p value ≤0.05 are included. Columns are the GO IDs, GO terms, p values, the GO subontology (BP – Biological Process, CC – Cellular Component, MF – Molecular Function), and the Ensembl IDs for the genes that are members of the GO ontology. p values were calculated using a one-sided Fisher’s exact test, and were not adjusted for multiple comparisons. (h) [file elife-77285-supp1.xlsx]

## Sheet: LEGENDS
1a	2,156 protein-coding genes that are significant by S-MultiXcan TWAS analysis (Bonferroni P-value <= 0.05). Columns are Ensembl ID, gene name, the nominal S-MultiXcan P-value, the number of tissues available to S-MultiXcan, the number of independent components of variation among the tissues, and the Bonferroni-adjusted P-value.
1b	1,182 protein-coding genes that are significant in the fastEnloc colocalization analysis (RCP >=0.1). Columns are Ensembl ID, signal cluster name from the eQTL analysis, the gene name, the regional colocalization probability, and the colocalizing GTEx tissue.
1c	The 512 protein-coding genes that are significant by both TWAS and colocalization. (Bonferroni P-value <= 0.05 and RCP >=0.1). Columns are Ensembl ID, signal cluster name from the eQTL analysis, gene name, the regional colocalization probability, the colocalizing GTEx tissue, the nominal S-MultiXcan P-value, and the Bonferroni-adjusted P-value.
1d	Number of the 512 significantly colocalizing genes per GTEx tissue. Columns are the GTEx tissue and the number of unique colocalizing eQTL in the relevant tissue.
1e	The "known bone gene" list. Columns are gene name and Ensembl ID.
1f	The 66 genes that are significant by both TWAS and colocalization (Bonferroni P-value <= 0.05 and RCP >=0.1), and are also members of the "known bone gene" list. Columns are gene name and Ensembl ID.
1g	Gene Ontology enrichments for the 512 protein-coding genes that are significant by both TWAS and colocalization (Bonferroni P-value <= 0.05 and RCP >=0.1). Only GO enrichments with a P-value<= 0.05 are included. Columns are the GO IDs, GO terms, P-values, the GO sub-ontology (BP - Biological Process, CC - Cellular Component, MF - Molecular Function), and the Ensembl IDs for the genes that are mem…
1h	The 863 genes closest to eBMD GWAS associations. These data were obtained from Morris, et al.6
1i	137 novel putatively-causal BMD genes, after increasing RCP>=0.5, and removing genes that were members of the "known bone gene" list and genes with a nominal (P<=0.05) alteration in BMD as determined by the IMPC. Columns are Gene name, Ensembl ID, colocalization RCP, the tissue with the highest RCP, the S-Multixcan Bonferroni-adjusted P-value, and the number of tissues that were significantly col…
1j	Results of the differential expression analysis performed on RNA isolated from vertebrae. The analysis results show the difference in expression between mutant and wild-type mice. The columns are the Ensembl IDs, gene names, baseMean (the average of normalized count values, taken over all samples), log2 fold change, standard error of the log2 fold change estimate, the Wald statistic, the test P-v…

## Sheet: 1a
Ensembl ID	Gene Name	Nominal TWAS P-value	n	n_indep	Bonferroni P-Value
ENSG00000115306	SPTBN1	0	48	12	<1E-325
ENSG00000120262	CCDC170	0	45	9	<1E-325
ENSG00000196937	FAM3C	0	48	2	<1E-325
ENSG00000002745	WNT16	0	23	8	<1E-325
ENSG00000184702	SEPT5	1.00975e-290	19	12	2.25517e-286
ENSG00000127418	FGFRL1	2.3766e-276	48	8	5.30789e-272
ENSG00000091831	ESR1	1.05087e-273	20	6	2.34701e-269
ENSG00000180875	GREM2	1.92851e-261	14	10	4.30714e-257
ENSG00000118518	RNF146	1.24377e-259	35	4	2.77784e-255
ENSG00000155816	FMN2	2.63811e-255	28	15	5.89195e-251
ENSG00000106483	SFRP4	5.74311e-255	21	6	1.28267e-250
ENSG00000106034	CPED1	2.7809e-245	31	4	6.21087e-241
ENSG00000146374	RSPO3	4.20861e-245	44	4	9.39951e-241
ENSG00000076650	GPATCH1	1.53854e-230	40	3	3.43618e-226
ENSG00000131941	RHPN2	3.89882e-225	48	3	8.70762e-221
ENSG00000106025	TSPAN12	1.47812e-205	36	4	3.30123e-201
ENSG00000112319	EYA4	1.53608e-189	34	6	3.43067e-185
ENSG00000214595	EML6	9.89963e-176	48	7	2.21098e-171
ENSG00000125378	BMP4	2.45957e-173	39	3	5.4932e-169
ENSG00000086289	EPDR1	2.68993e-169	37	10	6.0077e-165
ENSG00000124813	RUNX2	8.89681e-151	21	6	1.98701e-146
ENSG00000163064	EN1	1.80286e-147	15	5	4.02651e-143
ENSG00000070961	ATP2B1	1.25727e-144	33	8	2.80799e-140
ENSG00000162878	PKDCC	2.5347e-136	46	11	5.66101e-132
ENSG00000177150	FAM210A	1.94132e-132	48	6	4.33575e-128
ENSG00000166359	WDR88	5.09158e-120	36	5	1.13715e-115
ENSG00000231256	C17orf105	3.17682e-118	11	3	7.09512e-114
ENSG00000070366	SMG6	7.67322e-114	38	4	1.71374e-109
ENSG00000127419	TMEM175	2.3495e-113	46	6	5.24736e-109
ENSG00000161647	MPP3	7.24026e-111	20	3	1.61704e-106
ENSG00000137869	CYP19A1	4.90554e-108	20	9	1.0956e-103
ENSG00000100249	C22orf31	8.1798e-104	21	6	1.82688e-99
ENSG00000178950	GAK	3.33543e-103	49	6	7.44934e-99
ENSG00000182985	CADM1	5.73731e-102	17	10	1.28137e-97
ENSG00000101384	JAG1	4.00303e-101	21	8	8.94036e-97
ENSG00000162552	WNT4	3.91834e-100	44	10	8.75122e-96
ENSG00000166575	TMEM135	1.00092e-99	40	8	2.23546e-95
ENSG00000101654	RNMT	2.33175e-99	46	5	5.20774e-95
ENSG00000166166	TRMT61A	8.52529e-99	48	3	1.90404e-94
ENSG00000166165	CKB	3.1732e-98	47	3	7.08702e-94
ENSG00000110075	PPP6R3	2.55023e-97	46	6	5.69568e-93
ENSG00000155906	RMND1	5.3477e-95	46	4	1.19435e-90
ENSG00000183762	KREMEN1	6.73594e-95	44	5	1.5044e-90
ENSG00000149294	NCAM1	1.08066e-93	18	9	2.41354e-89
ENSG00000127415	IDUA	1.08518e-92	48	4	2.42364e-88
ENSG00000154319	FAM167A	2.00364e-92	37	11	4.47493e-88
ENSG00000075413	MARK3	2.15943e-92	49	3	4.82288e-88
ENSG00000175806	MSRA	7.98329e-89	32	8	1.78299e-84
ENSG00000116729	WLS	1.25207e-86	27	11	2.79636e-82
ENSG00000275342	PRAG1	1.3578e-84	44	11	3.03252e-80
ENSG00000176697	BDNF	7.89782e-82	20	7	1.7639e-77
ENSG00000171044	XKR6	4.55911e-80	13	4	1.01823e-75
ENSG00000147324	MFHAS1	2.83369e-78	44	7	6.32876e-74
ENSG00000167941	SOST	2.54387e-77	11	4	5.68147e-73
ENSG00000253649	PRSS51	7.14549e-77	25	11	1.59587e-72
ENSG00000205882	DEFB134	1.14157e-75	13	5	2.54959e-71
ENSG00000196660	SLC30A10	1.71391e-75	14	5	3.82785e-71
ENSG00000145214	DGKQ	2.10178e-75	48	4	4.69412e-71
ENSG00000197980	LEKR1	1.26201e-74	46	4	2.81856e-70
ENSG00000104626	ERI1	2.02411e-74	47	6	4.52066e-70
ENSG00000109881	CCDC34	3.00474e-74	32	4	6.71079e-70
ENSG00000111186	WNT5B	2.09328e-73	29	8	4.67514e-69
ENSG00000136573	BLK	2.1305e-73	28	3	4.75826e-69
ENSG00000196284	SUPT3H	1.92731e-72	49	4	4.30445e-68
ENSG00000090316	MAEA	3.29201e-72	41	4	7.35238e-68
ENSG00000177994	C2orf73	4.73205e-72	37	6	1.05686e-67
ENSG00000069482	GAL	1.11433e-71	29	4	2.48874e-67
ENSG00000253958	CLDN23	1.50794e-70	46	4	3.36782e-66
ENSG00000163945	UVSSA	3.57763e-69	49	2	7.99028e-65
ENSG00000150051	MKX	4.44698e-69	15	6	9.93188e-65
ENSG00000130881	LRP3	5.14055e-69	39	8	1.14809e-64
ENSG00000161664	ASB16	7.35415e-69	44	3	1.64248e-64
ENSG00000171056	SOX7	9.17374e-69	27	7	2.04886e-64
ENSG00000173281	PPP1R3B	9.9746e-69	35	5	2.22773e-64
ENSG00000071243	ING3	1.31157e-68	18	3	2.92926e-64
ENSG00000131668	BARX1	2.84879e-67	29	4	6.3625e-63
ENSG00000134569	LRP4	6.78536e-67	23	6	1.51544e-62
ENSG00000104643	MTMR9	7.49238e-67	42	2	1.67335e-62
ENSG00000171060	C8orf74	3.76159e-66	4	4	8.40113e-62
ENSG00000175216	CKAP5	6.73888e-66	19	5	1.50506e-61
ENSG00000149182	ARFGAP2	8.60647e-66	44	4	1.92217e-61
ENSG00000118785	SPP1	1.05324e-62	44	5	2.35231e-58
ENSG00000134574	DDB2	1.07767e-62	42	2	2.40688e-58
ENSG00000168591	TMUB2	2.19965e-62	41	2	4.91269e-58
ENSG00000165912	PACSIN3	2.3789e-62	38	3	5.31304e-58
ENSG00000125319	C17orf53	1.15971e-61	49	3	2.5901e-57
ENSG00000168993	CPLX1	1.7348e-61	34	7	3.8745e-57
ENSG00000152595	MEPE	3.22548e-61	5	3	7.2038e-57
ENSG00000108840	HDAC5	9.44453e-61	44	4	2.10934e-56
ENSG00000161654	LSM12	2.36273e-60	47	6	5.27692e-56
ENSG00000013583	HEBP1	5.13981e-59	32	6	1.14793e-54
ENSG00000068878	PSME4	5.52281e-59	48	6	1.23347e-54
ENSG00000070831	CDC42	2.62613e-58	48	5	5.86519e-54
ENSG00000106511	MEOX2	1.43559e-57	43	6	3.20625e-53
ENSG00000067955	CBFB	5.67619e-57	49	2	1.26772e-52
ENSG00000162341	TPCN2	8.05626e-57	40	9	1.79929e-52
ENSG00000175220	ARHGAP1	1.40431e-56	48	2	3.1364e-52
ENSG00000180210	F2	2.35036e-56	23	2	5.24929e-52
ENSG00000079459	FDFT1	4.07654e-56	43	8	9.10455e-52
ENSG00000240583	AQP1	8.64094e-56	16	9	1.92987e-51
ENSG00000178222	RNF212	9.12201e-56	48	5	2.03731e-51
ENSG00000177710	SLC35G5	9.30113e-56	41	2	2.07731e-51
ENSG00000175213	ZNF408	1.19359e-55	47	3	2.66576e-51
ENSG00000166170	BAG5	7.93816e-55	42	5	1.77291e-50
ENSG00000064932	SBNO2	1.73518e-54	23	9	3.87535e-50
ENSG00000164733	CTSB	1.32579e-53	46	6	2.96103e-49
ENSG00000126214	KLC1	1.48127e-53	44	3	3.30828e-49
ENSG00000141258	SGSM2	2.82996e-53	49	8	6.32044e-49
ENSG00000067167	TRAM1	1.69098e-51	48	4	3.77662e-47
ENSG00000147592	LACTB2	1.74255e-51	49	4	3.89182e-47
ENSG00000173442	EHBP1L1	7.12701e-51	29	7	1.59175e-46
ENSG00000006377	DLX6	7.88927e-51	26	5	1.76199e-46
ENSG00000142599	RERE	3.11106e-50	20	6	6.94825e-46
ENSG00000197580	BCO2	4.6188e-50	45	6	1.03156e-45
ENSG00000256053	APOPT1	1.68363e-49	38	4	3.76022e-45
ENSG00000088387	DOCK9	3.538e-49	48	7	7.90176e-45
ENSG00000141349	G6PC3	3.89394e-49	24	5	8.69673e-45
ENSG00000064655	EYA2	1.90761e-48	12	9	4.26046e-44
ENSG00000026508	CD44	4.41256e-48	39	7	9.85502e-44
ENSG00000164761	TNFRSF11B	4.80836e-48	46	7	1.0739e-43
ENSG00000104313	EYA1	5.93599e-48	16	7	1.32574e-43
ENSG00000221947	XKR9	6.35465e-48	47	1	1.41925e-43
ENSG00000007341	ST7L	7.95272e-48	49	2	1.77616e-43
ENSG00000254093	PINX1	8.59713e-48	44	4	1.92008e-43
ENSG00000134245	WNT2B	1.06921e-47	25	6	2.38798e-43
ENSG00000159674	SPON2	1.46775e-47	36	5	3.27807e-43
ENSG00000079819	EPB41L2	2.03049e-47	37	7	4.53489e-43
ENSG00000116489	CAPZA1	4.90071e-47	43	2	1.09453e-42
ENSG00000148737	TCF7L2	9.16138e-47	15	8	2.0461e-42
ENSG00000184374	COLEC10	3.06879e-46	15	6	6.85383e-42
ENSG00000149179	C11orf49	4.63077e-46	48	2	1.03424e-41
ENSG00000155363	MOV10	1.07923e-45	47	3	2.41035e-41
ENSG00000173465	SSSCA1	1.26031e-45	19	4	2.81477e-41
ENSG00000253293	HOXA10	1.84842e-45	10	6	4.12825e-41
ENSG00000213445	SIPA1	1.90622e-45	48	4	4.25734e-41
ENSG00000182179	UBA7	8.24447e-45	13	4	1.84132e-40
ENSG00000110696	C11orf58	1.08186e-44	43	4	2.41622e-40
ENSG00000168676	KCTD19	3.47908e-44	14	2	7.77017e-40
ENSG00000164061	BSN	4.70798e-44	7	4	1.05148e-39
ENSG00000164077	MON1A	8.42744e-44	43	3	1.88219e-39
ENSG00000135740	SLC9A5	1.12243e-43	48	3	2.50683e-39
ENSG00000135723	FHOD1	2.66691e-43	49	3	5.95628e-39
ENSG00000112306	RPS12	5.10921e-43	48	5	1.14109e-38
ENSG00000156535	CD109	5.33328e-43	48	10	1.19113e-38
ENSG00000198743	SLC5A3	9.21388e-43	21	12	2.05783e-38
ENSG00000172977	KAT5	2.3683e-42	15	6	5.28937e-38
ENSG00000172922	RNASEH2C	2.81955e-42	49	3	6.29718e-38
ENSG00000177374	HIC1	4.0972e-42	7	3	9.15069e-38
ENSG00000161653	NAGS	4.97042e-42	44	4	1.11009e-37
ENSG00000186417	GLDN	5.80826e-42	46	6	1.29722e-37
ENSG00000100711	ZFYVE21	9.53519e-42	28	6	2.12959e-37
ENSG00000166949	SMAD3	2.22e-41	47	9	4.95816e-37
ENSG00000103126	AXIN1	2.3114e-41	37	4	5.16228e-37
ENSG00000145022	TCTA	2.39868e-41	49	4	5.3572e-37
ENSG00000110077	MS4A6A	3.19741e-41	24	4	7.14109e-37
ENSG00000173039	RELA	3.71983e-41	34	5	8.30787e-37
ENSG00000155366	RHOC	8.27068e-41	28	7	1.84717e-36
ENSG00000173531	MST1	1.96587e-40	44	8	4.39057e-36
ENSG00000127804	METTL16	2.34181e-40	44	6	5.2302e-36
ENSG00000001617	SEMA3F	2.54847e-40	25	5	5.69175e-36
ENSG00000149346	SLX4IP	2.65562e-40	43	4	5.93106e-36
ENSG00000238083	LRRC37A2	2.73774e-40	9	6	6.11448e-36
ENSG00000183579	ZNRF3	4.03647e-40	17	5	9.01505e-36
ENSG00000102890	ELMO3	7.31265e-40	49	3	1.63321e-35
ENSG00000185615	PDIA2	8.14922e-40	41	9	1.82005e-35
ENSG00000214787	MS4A4E	1.24259e-39	30	3	2.7752e-35
ENSG00000124181	PLCG1	1.30588e-39	49	3	2.91655e-35
ENSG00000110693	SOX6	1.60161e-39	44	6	3.57704e-35
ENSG00000126215	XRCC3	2.12161e-39	47	3	4.7384e-35
ENSG00000173273	TNKS	2.36145e-39	27	5	5.27407e-35
ENSG00000125149	C16orf70	2.84658e-39	48	4	6.35756e-35
ENSG00000110079	MS4A4A	3.2033e-38	35	4	7.15426e-34
ENSG00000159692	CTBP1	3.20624e-38	49	4	7.16082e-34
ENSG00000243927	MRPS6	3.23396e-38	14	13	7.22272e-34
ENSG00000110719	TCIRG1	3.74972e-38	47	6	8.37463e-34
ENSG00000158747	NBL1	7.36252e-38	46	10	1.64434e-33
ENSG00000136628	EPRS	8.39887e-38	30	4	1.8758e-33
ENSG00000205213	LGR4	1.08794e-37	47	5	2.42982e-33
ENSG00000172818	OVOL1	1.22044e-37	40	6	2.72572e-33
ENSG00000138639	ARHGAP24	1.48749e-37	43	7	3.32216e-33
ENSG00000077549	CAPZB	1.63196e-37	37	7	3.64481e-33
ENSG00000185920	PTCH1	1.76319e-37	37	4	3.93791e-33
ENSG00000223443	USP17L2	2.02076e-37	5	5	4.51317e-33
ENSG00000153071	DAB2	4.69773e-37	47	4	1.04919e-32
ENSG00000146476	ARMT1	1.41178e-36	47	3	3.15308e-32
ENSG00000183638	RP1L1	1.48892e-36	13	4	3.32536e-32
ENSG00000215817	ZC3H11B	2.80936e-36	10	4	6.27444e-32
ENSG00000178021	TSPYL6	7.20228e-36	13	4	1.60856e-31
ENSG00000148943	LIN7C	2.62216e-35	36	3	5.85633e-31
ENSG00000139044	B4GALNT3	2.68795e-35	33	11	6.00326e-31
ENSG00000163659	TIPARP	2.83899e-35	38	6	6.34061e-31
ENSG00000100991	TRPC4AP	3.85781e-35	42	6	8.61602e-31
ENSG00000242173	ARHGDIG	3.86046e-35	45	8	8.62196e-31
ENSG00000163104	SMARCAD1	4.15926e-35	41	2	9.28928e-31
ENSG00000167601	AXL	4.36132e-35	39	4	9.74057e-31
ENSG00000114251	WNT5A	4.84419e-35	14	9	1.0819e-30
ENSG00000029559	IBSP	6.00025e-35	12	2	1.3401e-30
ENSG00000187672	ERC2	6.01256e-35	30	4	1.34284e-30
ENSG00000103449	SALL1	6.94181e-35	34	5	1.55038e-30
ENSG00000113319	RASGRF2	8.04855e-35	45	7	1.79756e-30
ENSG00000104447	TRPS1	8.145e-35	31	4	1.81911e-30
ENSG00000106052	TAX1BP1	8.45085e-35	37	5	1.88741e-30
ENSG00000166926	MS4A6E	8.60168e-35	8	3	1.9211e-30
ENSG00000019144	PHLDB1	9.72508e-35	46	6	2.172e-30
ENSG00000206503	HLA-A	1.23623e-34	48	6	2.76099e-30
ENSG00000120659	TNFSF11	2.17411e-34	19	3	4.85565e-30
ENSG00000074696	HACD3	2.66109e-34	48	4	5.94328e-30
ENSG00000164062	APEH	2.86892e-34	41	4	6.40745e-30
ENSG00000197136	PCNX3	4.06628e-34	38	2	9.08164e-30
ENSG00000132749	TESMIN	5.24155e-34	39	4	1.17065e-29
ENSG00000164164	OTUD4	6.12705e-34	13	3	1.36841e-29
ENSG00000136574	GATA4	6.26784e-34	3	3	1.39986e-29
ENSG00000105880	DLX5	8.49972e-34	37	5	1.89833e-29
ENSG00000123095	BHLHE41	1.31807e-33	27	6	2.94378e-29
ENSG00000135519	KCNH3	1.9579e-33	14	6	4.37277e-29
ENSG00000187492	CDHR4	2.97884e-33	12	3	6.65295e-29
ENSG00000183763	TRAIP	3.65637e-33	33	1	8.16613e-29
ENSG00000132510	KDM6B	3.76964e-33	24	3	8.41912e-29
ENSG00000100216	TOMM22	5.31253e-33	47	7	1.1865e-28
ENSG00000157554	ERG	6.17202e-33	23	7	1.37846e-28
ENSG00000164163	ABCE1	6.50996e-33	16	3	1.45394e-28
ENSG00000176095	IP6K1	6.99333e-33	48	3	1.56189e-28
ENSG00000173327	MAP3K11	8.79299e-33	48	2	1.96383e-28
ENSG00000092607	TBX15	8.83279e-33	34	4	1.97272e-28
ENSG00000154328	NEIL2	9.87085e-33	48	4	2.20455e-28
ENSG00000183011	NAA38	1.01928e-32	38	4	2.27646e-28
ENSG00000100883	SRP54	1.15188e-32	36	5	2.57261e-28
ENSG00000159873	CCDC117	1.43416e-32	47	4	3.20306e-28
ENSG00000099194	SCD	1.53263e-32	18	8	3.42297e-28
ENSG00000100219	XBP1	2.64499e-32	49	4	5.90732e-28
ENSG00000189367	KIAA0408	2.75556e-32	47	8	6.15426e-28
ENSG00000214706	IFRD2	4.91074e-32	27	3	1.09676e-27
ENSG00000170004	CHD3	5.60336e-32	28	7	1.25146e-27
ENSG00000140577	CRTC3	9.28972e-32	47	5	2.07477e-27
ENSG00000182224	CYB5D1	9.53106e-32	45	4	2.12867e-27
ENSG00000185614	FAM212A	1.1736e-31	45	3	2.62112e-27
ENSG00000100226	GTPBP1	1.59269e-31	49	4	3.55711e-27
ENSG00000118094	TREH	1.74641e-31	36	2	3.90044e-27
ENSG00000108852	MPP2	2.24502e-31	49	5	5.01403e-27
ENSG00000150783	TEX12	3.16565e-31	43	5	7.07015e-27
ENSG00000100221	JOSD1	3.33045e-31	33	5	7.43823e-27
ENSG00000158079	PTPDC1	3.63035e-31	38	4	8.10803e-27
ENSG00000078399	HOXA9	3.97636e-31	22	5	8.8808e-27
ENSG00000159708	LRRC36	4.51651e-31	20	3	1.00872e-26
ENSG00000184949	FAM227A	7.43349e-31	47	3	1.6602e-26
ENSG00000143942	CHAC2	1.00377e-30	44	7	2.24181e-26
ENSG00000065526	SPEN	1.06632e-30	18	4	2.38152e-26
ENSG00000158169	FANCC	1.09369e-30	45	6	2.44265e-26
ENSG00000167549	CORO6	1.21029e-30	28	3	2.70307e-26
ENSG00000142186	SCYL1	1.31021e-30	23	3	2.92622e-26
ENSG00000100211	CBY1	1.38802e-30	49	3	3.10001e-26
ENSG00000254470	AP5B1	1.74414e-30	48	3	3.89537e-26
ENSG00000140939	NOL3	2.88003e-30	21	4	6.43227e-26
ENSG00000161714	PLCD3	3.1735e-30	30	8	7.0877e-26
ENSG00000149091	DGKZ	4.01686e-30	14	2	8.97127e-26
ENSG00000100242	SUN2	5.24047e-30	24	9	1.17041e-25
ENSG00000172493	AFF1	5.93244e-30	23	8	1.32495e-25
ENSG00000170634	ACYP2	7.95076e-30	49	6	1.77572e-25
ENSG00000140575	IQGAP1	8.14875e-30	49	2	1.81994e-25
ENSG00000168056	LTBP3	1.58058e-29	47	3	3.53007e-25
ENSG00000107669	ATE1	1.6737e-29	49	5	3.73804e-25
ENSG00000086205	FOLH1	2.1406e-29	45	5	4.78082e-25
ENSG00000100201	DDX17	2.19268e-29	38	3	4.89713e-25
ENSG00000151292	CSNK1G3	2.62442e-29	49	5	5.86137e-25
ENSG00000164162	ANAPC10	2.98259e-29	11	3	6.66131e-25
ENSG00000149534	MS4A2	3.11298e-29	25	2	6.95254e-25
ENSG00000067113	PLPP1	3.44166e-29	48	6	7.6866e-25
ENSG00000131096	PYY	4.83653e-29	5	2	1.08019e-24
ENSG00000088386	SLC15A1	5.57517e-29	15	6	1.24516e-24
ENSG00000125845	BMP2	5.69663e-29	38	4	1.27228e-24
ENSG00000127081	ZNF484	6.81667e-29	46	9	1.52243e-24
ENSG00000006534	ALDH3B1	7.72632e-29	46	8	1.7256e-24
ENSG00000198604	BAZ1A	8.07606e-29	24	9	1.80371e-24
ENSG00000115310	RTN4	1.45012e-28	39	10	3.23871e-24
ENSG00000183023	SLC8A1	1.58483e-28	9	7	3.53956e-24
ENSG00000162426	SLC45A1	1.85183e-28	27	5	4.13587e-24
ENSG00000068383	INPP5A	2.09814e-28	40	6	4.68598e-24
ENSG00000121289	CEP89	2.99778e-28	47	5	6.69524e-24
ENSG00000116809	ZBTB17	3.98951e-28	23	3	8.91017e-24
ENSG00000176692	FOXC2	5.36489e-28	15	15	1.19819e-23
ENSG00000086504	MRPL28	5.45258e-28	48	5	1.21778e-23
ENSG00000184647	PRSS55	9.13437e-28	15	4	2.04007e-23
ENSG00000106004	HOXA5	9.59027e-28	36	7	2.14189e-23
ENSG00000100209	HSCB	1.10465e-27	47	7	2.46712e-23
ENSG00000108963	DPH1	1.22213e-27	49	3	2.7295e-23
ENSG00000173338	KCNK7	1.85311e-27	45	2	4.13873e-23
ENSG00000129951	PLPPR3	1.92707e-27	12	6	4.30391e-23
ENSG00000167721	TSR1	2.68384e-27	15	6	5.9941e-23
ENSG00000166452	AKIP1	3.22667e-27	48	3	7.20645e-23
ENSG00000204160	ZDHHC18	4.73515e-27	19	4	1.05755e-22
ENSG00000138162	TACC2	6.226e-27	36	11	1.39051e-22
ENSG00000134531	EMP1	6.35793e-27	30	8	1.41998e-22
ENSG00000103335	PIEZO1	9.18288e-27	35	11	2.0509e-22
ENSG00000088298	EDEM2	1.06073e-26	47	2	2.36902e-22
ENSG00000101000	PROCR	1.21195e-26	29	5	2.70678e-22
ENSG00000078814	MYH7B	1.55251e-26	49	3	3.46738e-22
ENSG00000105997	HOXA3	1.58462e-26	32	6	3.53909e-22
ENSG00000172270	BSG	1.62767e-26	33	9	3.63524e-22
ENSG00000118971	CCND2	1.74252e-26	36	3	3.89173e-22
ENSG00000213639	PPP1CB	1.7652e-26	48	3	3.9424e-22
ENSG00000011028	MRC2	1.81487e-26	36	7	4.05334e-22
ENSG00000171132	PRKCE	1.93661e-26	27	7	4.32523e-22
ENSG00000233276	GPX1	2.68876e-26	40	2	6.00508e-22
ENSG00000100206	DMC1	3.58241e-26	30	4	8.00096e-22
ENSG00000115183	TANC1	4.93542e-26	48	11	1.10228e-21
ENSG00000185950	IRS2	5.06917e-26	12	5	1.13215e-21
ENSG00000025434	NR1H3	5.32763e-26	49	4	1.18987e-21
ENSG00000164078	MST1R	5.76595e-26	49	2	1.28777e-21
ENSG00000067560	RHOA	5.93633e-26	38	2	1.32582e-21
ENSG00000101440	ASIP	7.40567e-26	4	2	1.65398e-21
ENSG00000183386	FHL3	7.57198e-26	40	2	1.69113e-21
ENSG00000235608	NKX1-1	9.77536e-26	2	1	2.18323e-21
ENSG00000173402	DAG1	1.11409e-25	28	2	2.4882e-21
ENSG00000100784	RPS6KA5	1.49541e-25	31	7	3.33986e-21
ENSG00000196391	ZNF774	1.49791e-25	46	6	3.34543e-21
ENSG00000155760	FZD7	1.55325e-25	45	2	3.46904e-21
ENSG00000151327	FAM177A1	1.56196e-25	48	4	3.48848e-21
ENSG00000127863	TNFRSF19	1.57589e-25	46	9	3.5196e-21
ENSG00000186998	EMID1	1.88584e-25	46	8	4.21183e-21
ENSG00000136448	NMT1	1.97325e-25	46	3	4.40706e-21
ENSG00000225190	PLEKHM1	2.18665e-25	7	4	4.88366e-21
ENSG00000151612	ZNF827	2.52364e-25	44	3	5.6363e-21
ENSG00000180423	HARBI1	2.67658e-25	44	1	5.97788e-21
ENSG00000134575	ACP2	3.20631e-25	49	3	7.16097e-21
ENSG00000162458	FBLIM1	3.3327e-25	37	7	7.44325e-21
ENSG00000197548	ATG7	3.5922e-25	48	4	8.02282e-21
ENSG00000180720	CHRM4	4.11261e-25	11	1	9.18511e-21
ENSG00000141298	SSH2	4.22743e-25	43	2	9.44154e-21
ENSG00000183431	SF3A3	5.19318e-25	47	3	1.15985e-20
ENSG00000198945	L3MBTL3	5.23959e-25	46	3	1.17021e-20
ENSG00000124783	SSR1	5.42487e-25	35	9	1.21159e-20
ENSG00000107164	FUBP3	5.65724e-25	36	4	1.26349e-20
ENSG00000162551	ALPL	5.77421e-25	11	7	1.28961e-20
ENSG00000166444	ST5	5.94093e-25	32	5	1.32685e-20
ENSG00000110497	AMBRA1	6.47863e-25	44	2	1.44694e-20
ENSG00000185340	GAS2L1	9.31095e-25	49	4	2.07951e-20
ENSG00000122870	BICC1	1.03695e-24	37	4	2.31593e-20
ENSG00000219073	CELA3B	1.12612e-24	6	5	2.51507e-20
ENSG00000120594	PLXDC2	1.14065e-24	29	6	2.54752e-20
ENSG00000168036	CTNNB1	1.25172e-24	44	2	2.79558e-20
ENSG00000131242	RAB11FIP4	1.27379e-24	39	8	2.84488e-20
ENSG00000066248	NGEF	1.51777e-24	45	8	3.38979e-20
ENSG00000159314	ARHGAP27	1.81688e-24	44	3	4.05783e-20
ENSG00000150787	PTS	1.97885e-24	26	3	4.41956e-20
ENSG00000013375	PGM3	2.16893e-24	48	5	4.8441e-20
ENSG00000176927	EFCAB5	2.6887e-24	37	1	6.00495e-20
ENSG00000183765	CHEK2	2.89144e-24	34	6	6.45775e-20
ENSG00000070018	LRP6	2.98793e-24	42	5	6.67324e-20
ENSG00000183798	EMILIN3	3.16776e-24	46	6	7.07489e-20
ENSG00000067248	DHX29	3.60392e-24	47	3	8.049e-20
ENSG00000090686	USP48	3.94605e-24	46	5	8.81311e-20
ENSG00000110492	MDK	4.43611e-24	38	1	9.90761e-20
ENSG00000175224	ATG13	4.5115e-24	38	2	1.0076e-19
ENSG00000041988	THAP3	4.54926e-24	49	2	1.01603e-19
ENSG00000013392	RWDD2A	5.53102e-24	48	2	1.2353e-19
ENSG00000145029	NICN1	5.86423e-24	47	3	1.30972e-19
ENSG00000125629	INSIG2	7.09046e-24	48	4	1.58358e-19
ENSG00000106049	HIBADH	8.664e-24	45	5	1.93502e-19
ENSG00000213889	PPM1N	8.78096e-24	44	3	1.96114e-19
ENSG00000118507	AKAP7	9.42322e-24	48	5	2.10458e-19
ENSG00000163633	C4orf36	1.17047e-23	48	4	2.61412e-19
ENSG00000168944	CEP120	1.37513e-23	32	4	3.07122e-19
ENSG00000127922	SEM1	1.37628e-23	34	2	3.07379e-19
ENSG00000162104	ADCY9	2.02436e-23	44	6	4.5212e-19
ENSG00000136854	STXBP1	2.1307e-23	20	5	4.7587e-19
ENSG00000186326	RGS9BP	2.34856e-23	41	6	5.24528e-19
ENSG00000175348	TMEM9B	2.6497e-23	38	5	5.91783e-19
ENSG00000078804	TP53INP2	2.94129e-23	35	2	6.56908e-19
ENSG00000100276	RASL10A	2.94564e-23	44	5	6.57878e-19
ENSG00000179195	ZNF664	2.9911e-23	43	6	6.68033e-19
ENSG00000023516	AKAP11	3.0164e-23	49	3	6.73683e-19
ENSG00000004534	RBM6	4.6094e-23	48	1	1.02946e-18
ENSG00000103342	GSPT1	4.6181e-23	49	6	1.03141e-18
ENSG00000100399	CHADL	4.73364e-23	27	4	1.05721e-18
ENSG00000163359	COL6A3	4.97388e-23	9	6	1.11087e-18
ENSG00000128536	CDHR3	5.11227e-23	44	5	1.14178e-18
ENSG00000112175	BMP5	7.15094e-23	9	6	1.59709e-18
ENSG00000183396	TMEM89	8.36257e-23	22	3	1.8677e-18
ENSG00000125740	FOSB	1.11449e-22	32	2	2.4891e-18
ENSG00000196636	SDHAF3	1.36849e-22	46	5	3.05638e-18
ENSG00000136830	FAM129B	1.6679e-22	46	5	3.72509e-18
ENSG00000164047	CAMP	1.69623e-22	19	4	3.78836e-18
ENSG00000115648	MLPH	1.70187e-22	27	5	3.80096e-18
ENSG00000102908	NFAT5	1.80635e-22	35	9	4.03431e-18
ENSG00000135845	PIGC	2.12409e-22	42	6	4.74395e-18
ENSG00000146151	HMGCLL1	2.215e-22	34	4	4.94697e-18
ENSG00000131067	GGT7	2.25929e-22	49	2	5.04591e-18
ENSG00000112964	GHR	2.3164e-22	22	8	5.17344e-18
ENSG00000106006	HOXA6	2.40801e-22	28	6	5.37805e-18
ENSG00000174243	DDX23	2.84634e-22	47	4	6.35701e-18
ENSG00000189067	LITAF	3.7448e-22	38	12	8.36364e-18
ENSG00000150054	MPP7	4.67725e-22	42	10	1.04462e-17
ENSG00000126653	NSRP1	6.07647e-22	31	3	1.35712e-17
ENSG00000174233	ADCY6	7.2982e-22	49	6	1.62998e-17
ENSG00000105643	ARRDC2	7.72707e-22	33	9	1.72576e-17
ENSG00000065243	PKN2	7.95806e-22	47	2	1.77735e-17
ENSG00000176136	MC5R	8.02759e-22	11	6	1.79288e-17
ENSG00000119004	CYP20A1	9.07693e-22	17	4	2.02724e-17
ENSG00000115461	IGFBP5	1.08178e-21	4	4	2.41605e-17
ENSG00000157227	MMP14	1.12189e-21	35	5	2.50562e-17
ENSG00000107672	NSMCE4A	1.22401e-21	45	7	2.7337e-17
ENSG00000162194	LBHD1	1.3801e-21	49	2	3.08232e-17
ENSG00000078699	CBFA2T2	1.48519e-21	44	5	3.31703e-17
ENSG00000129194	SOX15	1.62973e-21	25	4	3.63984e-17
ENSG00000166446	CDYL2	1.92666e-21	43	3	4.30299e-17
ENSG00000003756	RBM5	2.22305e-21	25	3	4.96495e-17
ENSG00000183098	GPC6	2.30091e-21	45	6	5.13884e-17
ENSG00000188897	CTD-3088G3.8	2.44374e-21	37	10	5.45784e-17
ENSG00000037965	HOXC8	2.56759e-21	16	4	5.73445e-17
ENSG00000118420	UBE3D	2.69022e-21	44	2	6.00834e-17
ENSG00000147655	RSPO2	3.1192e-21	33	6	6.96642e-17
ENSG00000183520	UTP11	4.13018e-21	35	8	9.22434e-17
ENSG00000074603	DPP8	5.40931e-21	34	3	1.20812e-16
ENSG00000101460	MAP1LC3A	5.72564e-21	47	2	1.27877e-16
ENSG00000179593	ALOX15B	5.82337e-21	24	6	1.30059e-16
ENSG00000171813	PWWP2B	7.38585e-21	47	8	1.64956e-16
ENSG00000039123	SKIV2L2	7.61097e-21	47	4	1.69983e-16
ENSG00000205250	E2F4	7.68677e-21	49	3	1.71676e-16
ENSG00000184530	C6orf58	8.32266e-21	10	4	1.85878e-16
ENSG00000125971	DYNLRB1	9.11438e-21	29	2	2.03561e-16
ENSG00000131094	C1QL1	9.65711e-21	7	7	2.15682e-16
ENSG00000076864	RAP1GAP	9.70542e-21	35	9	2.16761e-16
ENSG00000204632	HLA-G	1.03259e-20	48	7	2.3062e-16
ENSG00000110514	MADD	1.1361e-20	48	4	2.53736e-16
ENSG00000198646	NCOA6	1.16514e-20	46	2	2.60222e-16
ENSG00000078747	ITCH	1.34312e-20	17	2	2.99972e-16
ENSG00000114316	USP4	1.46947e-20	45	2	3.28191e-16
ENSG00000100395	L3MBTL2	1.55864e-20	25	4	3.48108e-16
ENSG00000124508	BTN2A2	1.84051e-20	49	5	4.11059e-16
ENSG00000156113	KCNMA1	1.87599e-20	33	11	4.18983e-16
ENSG00000004864	SLC25A13	2.42563e-20	13	4	5.41739e-16
ENSG00000068745	IP6K2	2.6348e-20	48	4	5.88455e-16
ENSG00000174306	ZHX3	2.97326e-20	43	4	6.64048e-16
ENSG00000183578	TNFAIP8L3	2.98061e-20	24	6	6.65689e-16
ENSG00000139549	DHH	2.98879e-20	4	3	6.67517e-16
ENSG00000204655	MOG	3.03883e-20	25	6	6.78692e-16
ENSG00000159713	TPPP3	3.25721e-20	47	3	7.27464e-16
ENSG00000120708	TGFBI	3.28444e-20	49	8	7.33547e-16
ENSG00000101665	SMAD7	3.30208e-20	32	5	7.37486e-16
ENSG00000016864	GLT8D1	3.36195e-20	49	2	7.50858e-16
ENSG00000138614	INTS14	3.77822e-20	46	3	8.43827e-16
ENSG00000100393	EP300	3.90965e-20	44	2	8.73181e-16
ENSG00000131016	AKAP12	4.6862e-20	10	7	1.04661e-15
ENSG00000101464	PIGU	5.31246e-20	36	2	1.18648e-15
ENSG00000170606	HSPA4	5.53601e-20	47	4	1.23641e-15
ENSG00000182584	ACTL10	6.08488e-20	23	2	1.359e-15
ENSG00000159714	ZDHHC1	6.69693e-20	7	2	1.49569e-15
ENSG00000158373	HIST1H2BD	7.38519e-20	31	4	1.64941e-15
ENSG00000047315	POLR2B	7.40006e-20	34	5	1.65273e-15
ENSG00000108861	DUSP3	9.03596e-20	31	3	2.01809e-15
ENSG00000107593	PKD2L1	9.44662e-20	15	6	2.10981e-15
ENSG00000118200	CAMSAP2	1.02276e-19	46	7	2.28423e-15
ENSG00000167930	FAM234A	1.18895e-19	43	7	2.6554e-15
ENSG00000149177	PTPRJ	1.29108e-19	33	3	2.88349e-15
ENSG00000011304	PTBP1	1.35911e-19	24	9	3.03543e-15
ENSG00000204681	GABBR1	1.45436e-19	37	7	3.24817e-15
ENSG00000081014	AP4E1	1.45689e-19	46	6	3.25381e-15
ENSG00000110367	DDX6	1.49986e-19	47	3	3.34978e-15
ENSG00000204084	INPP5B	1.8359e-19	49	3	4.1003e-15
ENSG00000188315	C3orf62	1.86304e-19	46	2	4.16092e-15
ENSG00000084093	REST	1.92255e-19	41	4	4.29381e-15
ENSG00000111305	GSG1	2.14433e-19	11	3	4.78915e-15
ENSG00000170035	UBE2E3	2.32143e-19	46	6	5.18467e-15
ENSG00000101417	PXMP4	2.50538e-19	49	6	5.59552e-15
ENSG00000204644	ZFP57	2.75587e-19	40	3	6.15495e-15
ENSG00000167600	CYP2S1	3.46444e-19	43	7	7.73749e-15
ENSG00000116273	PHF13	3.75311e-19	20	4	8.3822e-15
ENSG00000177352	CCDC71	3.90933e-19	31	3	8.73109e-15
ENSG00000100403	ZC3H7B	3.96994e-19	49	3	8.86646e-15
ENSG00000119718	EIF2B2	3.99465e-19	49	1	8.92164e-15
ENSG00000138166	DUSP5	4.57008e-19	48	3	1.02068e-14
ENSG00000129925	TMEM8A	4.7259e-19	43	6	1.05548e-14
ENSG00000185924	RTN4RL1	4.7646e-19	34	10	1.06412e-14
ENSG00000174485	DENND4A	5.16365e-19	43	4	1.15325e-14
ENSG00000137947	GTF2B	5.53906e-19	17	4	1.23709e-14
ENSG00000175164	ABO	5.68761e-19	48	4	1.27027e-14
ENSG00000177311	ZBTB38	5.88776e-19	23	5	1.31497e-14
ENSG00000198682	PAPSS2	6.2374e-19	35	5	1.39306e-14
ENSG00000168769	TET2	6.23792e-19	40	5	1.39318e-14
ENSG00000124177	CHD6	6.49165e-19	43	7	1.44984e-14
ENSG00000124557	BTN1A1	6.65325e-19	11	5	1.48594e-14
ENSG00000179008	C14orf39	6.7099e-19	23	3	1.49859e-14
ENSG00000175352	NRIP3	7.54934e-19	49	6	1.68607e-14
ENSG00000118762	PKD2	8.5564e-19	48	6	1.91099e-14
ENSG00000100345	MYH9	9.39652e-19	45	4	2.09862e-14
ENSG00000105656	ELL	9.56608e-19	41	6	2.13649e-14
ENSG00000264522	OTUD7B	1.01679e-18	49	2	2.27089e-14
ENSG00000204977	TRIM13	1.11384e-18	47	2	2.48765e-14
ENSG00000012061	ERCC1	1.12652e-18	39	5	2.51597e-14
ENSG00000122691	TWIST1	1.18934e-18	8	7	2.65628e-14
ENSG00000178467	P4HTM	1.24554e-18	43	2	2.78179e-14
ENSG00000171824	EXOSC10	1.31191e-18	48	2	2.93002e-14
ENSG00000092969	TGFB2	1.43251e-18	11	8	3.19937e-14
ENSG00000105323	HNRNPUL1	1.46566e-18	44	3	3.27341e-14
ENSG00000189298	ZKSCAN3	1.57834e-18	49	6	3.52506e-14
ENSG00000137338	PGBD1	1.67357e-18	39	5	3.73776e-14
ENSG00000072364	AFF4	1.69439e-18	40	4	3.78425e-14
ENSG00000103742	IGDCC4	1.92013e-18	34	5	4.28841e-14
ENSG00000106278	PTPRZ1	2.34573e-18	27	4	5.23894e-14
ENSG00000171819	ANGPTL7	2.41406e-18	41	3	5.39156e-14
ENSG00000165410	CFL2	2.48269e-18	45	4	5.54483e-14
ENSG00000119242	CCDC92	2.68949e-18	43	5	6.0067e-14
ENSG00000188064	WNT7B	2.78452e-18	15	8	6.21895e-14
ENSG00000158560	DYNC1I1	3.05838e-18	37	4	6.83059e-14
ENSG00000122592	HOXA7	3.15131e-18	28	5	7.03815e-14
ENSG00000161958	FGF11	3.15327e-18	43	6	7.04252e-14
ENSG00000213593	TMX2	3.33905e-18	39	3	7.45744e-14
ENSG00000150782	IL18	3.40768e-18	39	4	7.61072e-14
ENSG00000100154	TTC28	3.51841e-18	42	8	7.85802e-14
ENSG00000184302	SIX6	3.76967e-18	2	2	8.41919e-14
ENSG00000153107	ANAPC1	3.79804e-18	25	6	8.48255e-14
ENSG00000153094	BCL2L11	3.96824e-18	44	6	8.86267e-14
ENSG00000177479	ARIH2	4.34499e-18	37	1	9.7041e-14
ENSG00000180376	CCDC66	4.42889e-18	49	5	9.89149e-14
ENSG00000172992	DCAKD	4.47259e-18	49	3	9.98908e-14
ENSG00000113658	SMAD5	4.67628e-18	48	4	1.0444e-13
ENSG00000198720	ANKRD13B	4.80584e-18	35	4	1.07334e-13
ENSG00000007923	DNAJC11	4.9443e-18	33	3	1.10426e-13
ENSG00000008441	NFIX	5.23673e-18	48	4	1.16957e-13
ENSG00000198793	MTOR	6.03592e-18	40	1	1.34806e-13
ENSG00000134824	FADS2	6.86794e-18	39	4	1.53389e-13
ENSG00000213949	ITGA1	7.0521e-18	44	9	1.57501e-13
ENSG00000149485	FADS1	7.94024e-18	47	2	1.77337e-13
ENSG00000125967	NECAB3	9.47888e-18	40	2	2.11701e-13
ENSG00000127743	IL17B	1.08788e-17	22	6	2.42966e-13
ENSG00000118473	SGIP1	1.24143e-17	38	6	2.7726e-13
ENSG00000162998	FRZB	1.24162e-17	47	6	2.77303e-13
ENSG00000147437	GNRH1	1.29103e-17	21	7	2.88338e-13
ENSG00000137269	LRRC1	1.37666e-17	46	6	3.07462e-13
ENSG00000065000	AP3D1	1.61526e-17	35	7	3.60753e-13
ENSG00000123106	CCDC91	1.72699e-17	47	4	3.85706e-13
ENSG00000204657	OR2H2	1.76065e-17	43	6	3.93223e-13
ENSG00000108379	WNT3	2.0792e-17	47	3	4.64369e-13
ENSG00000176842	IRX5	2.09546e-17	26	2	4.68e-13
ENSG00000189134	NKAPL	2.10889e-17	46	5	4.70999e-13
ENSG00000104885	DOT1L	2.28058e-17	33	5	5.09346e-13
ENSG00000178057	NDUFAF3	2.64043e-17	30	2	5.89713e-13
ENSG00000159723	AGRP	2.66745e-17	5	3	5.95748e-13
ENSG00000116649	SRM	2.77791e-17	47	3	6.20419e-13
ENSG00000146409	SLC18B1	2.94749e-17	49	2	6.58293e-13
ENSG00000178149	DALRD3	2.95648e-17	36	2	6.60301e-13
ENSG00000141699	FAM134C	3.21018e-17	18	3	7.16963e-13
ENSG00000138152	BTBD16	3.30418e-17	45	5	7.37956e-13
ENSG00000093134	VNN3	3.31775e-17	36	4	7.40987e-13
ENSG00000154856	APCDD1	3.50566e-17	30	8	7.82955e-13
ENSG00000091947	TMEM101	3.63052e-17	47	4	8.10841e-13
ENSG00000180957	PITPNB	3.67759e-17	45	7	8.21354e-13
ENSG00000168496	FEN1	3.84173e-17	24	3	8.58013e-13
ENSG00000005243	COPZ2	4.42009e-17	47	6	9.87182e-13
ENSG00000004139	SARM1	4.69813e-17	46	3	1.04928e-12
ENSG00000234602	MCIDAS	5.09589e-17	14	2	1.13812e-12
ENSG00000167535	CACNB3	5.14473e-17	48	4	1.14902e-12
ENSG00000164406	LEAP2	5.75913e-17	21	3	1.28625e-12
ENSG00000138829	FBN2	6.15048e-17	37	4	1.37365e-12
ENSG00000140332	TLE3	6.87855e-17	38	11	1.53625e-12
ENSG00000167528	ZNF641	7.05998e-17	48	5	1.57678e-12
ENSG00000163803	PLB1	7.26186e-17	24	8	1.62186e-12
ENSG00000101412	E2F1	7.9728e-17	45	4	1.78064e-12
ENSG00000181513	ACBD4	9.35786e-17	48	3	2.08998e-12
ENSG00000131462	TUBG1	9.77851e-17	46	4	2.18393e-12
ENSG00000108654	DDX5	9.93249e-17	41	2	2.21832e-12
ENSG00000109083	IFT20	1.00902e-16	6	2	2.25355e-12
ENSG00000169750	RAC3	1.02278e-16	44	6	2.28429e-12
ENSG00000126785	RHOJ	1.11209e-16	41	3	2.48375e-12
ENSG00000138758	SEPT11	1.12096e-16	34	7	2.50355e-12
ENSG00000105655	ISYNA1	1.13401e-16	42	2	2.53269e-12
ENSG00000119684	MLH3	1.21564e-16	48	3	2.71501e-12
ENSG00000164068	RNF123	1.34875e-16	43	1	3.01231e-12
ENSG00000114302	PRKAR2A	1.34935e-16	49	2	3.01364e-12
ENSG00000170175	CHRNB1	1.38445e-16	46	3	3.09202e-12
ENSG00000081320	STK17B	1.39615e-16	43	7	3.11816e-12
ENSG00000152518	ZFP36L2	1.40778e-16	47	5	3.14415e-12
ENSG00000108849	PPY	1.40926e-16	1	1	3.14744e-12
ENSG00000166828	SCNN1G	1.40964e-16	34	4	3.1483e-12
ENSG00000151150	ANK3	1.46496e-16	38	7	3.27184e-12
ENSG00000164885	CDK5	1.54151e-16	24	4	3.4428e-12
ENSG00000185909	KLHDC8B	1.62416e-16	49	3	3.62739e-12
ENSG00000108179	PPIF	1.67809e-16	29	5	3.74784e-12
ENSG00000088727	KIF9	1.77618e-16	5	2	3.96693e-12
ENSG00000099246	RAB18	1.79036e-16	6	4	3.99859e-12
ENSG00000149115	TNKS1BP1	2.09575e-16	41	4	4.68066e-12
ENSG00000010803	SCMH1	2.2073e-16	43	3	4.92979e-12
ENSG00000173421	CCDC36	2.32247e-16	42	2	5.18701e-12
ENSG00000144560	VGLL4	2.41288e-16	11	9	5.38892e-12
ENSG00000010256	UQCRC1	2.50066e-16	2	2	5.58497e-12
ENSG00000082641	NFE2L1	2.81867e-16	29	6	6.29522e-12
ENSG00000103404	USP31	2.82211e-16	44	5	6.3029e-12
ENSG00000176973	FAM89B	2.85654e-16	49	2	6.37979e-12
ENSG00000113396	SLC27A6	2.9033e-16	38	9	6.48424e-12
ENSG00000040487	PQLC2	2.9486e-16	48	6	6.5854e-12
ENSG00000172046	USP19	3.03099e-16	10	2	6.76941e-12
ENSG00000112303	VNN2	3.12624e-16	38	4	6.98215e-12
ENSG00000148110	MFSD14B	3.2086e-16	41	5	7.16609e-12
ENSG00000258890	CEP95	3.22368e-16	47	3	7.19976e-12
ENSG00000109805	NCAPG	3.37727e-16	42	3	7.54279e-12
ENSG00000100968	NFATC4	3.46911e-16	42	6	7.74791e-12
ENSG00000074800	ENO1	3.52659e-16	35	3	7.87629e-12
ENSG00000204217	BMPR2	3.55637e-16	47	6	7.94281e-12
ENSG00000140455	USP3	3.59574e-16	30	4	8.03073e-12
ENSG00000004142	POLDIP2	3.61377e-16	48	3	8.071e-12
ENSG00000169689	CENPX	3.73541e-16	49	2	8.34266e-12
ENSG00000051825	MPHOSPH9	3.82097e-16	46	3	8.53375e-12
ENSG00000109111	SUPT6H	3.94022e-16	13	5	8.80008e-12
ENSG00000152527	PLEKHH2	4.21309e-16	49	4	9.40951e-12
ENSG00000100526	CDKN3	4.23104e-16	28	3	9.4496e-12
ENSG00000141568	FOXK2	4.39812e-16	37	10	9.82277e-12
ENSG00000167207	NOD2	4.54981e-16	37	6	1.01615e-11
ENSG00000126778	SIX1	4.71225e-16	39	1	1.05243e-11
ENSG00000187546	AGMO	4.85577e-16	39	13	1.08449e-11
ENSG00000138386	NAB1	4.98233e-16	43	5	1.11275e-11
ENSG00000100983	GSS	5.07918e-16	49	3	1.13439e-11
ENSG00000163362	C1orf106	5.12265e-16	25	10	1.14409e-11
ENSG00000196576	PLXNB2	5.1964e-16	48	11	1.16056e-11
ENSG00000174282	ZBTB4	5.27889e-16	49	3	1.17899e-11
ENSG00000162413	KLHL21	5.3068e-16	8	3	1.18522e-11
ENSG00000178177	LCORL	5.30694e-16	47	5	1.18525e-11
ENSG00000168646	AXIN2	5.47592e-16	13	8	1.22299e-11
ENSG00000170345	FOS	5.49956e-16	45	7	1.22827e-11
ENSG00000180340	FZD2	5.71158e-16	39	6	1.27562e-11
ENSG00000171103	TRMT61B	5.72304e-16	48	1	1.27818e-11
ENSG00000108784	NAGLU	6.08097e-16	40	5	1.35812e-11
ENSG00000120833	SOCS2	6.11054e-16	23	6	1.36473e-11
ENSG00000178882	RFLNA	6.45677e-16	35	7	1.44206e-11
ENSG00000131910	NR0B2	6.5049e-16	21	6	1.4528e-11
ENSG00000148303	RPL7A	6.61351e-16	46	5	1.47706e-11
ENSG00000152669	CCNO	7.05019e-16	45	3	1.57459e-11
ENSG00000129214	SHBG	7.91191e-16	10	6	1.76705e-11
ENSG00000174804	FZD4	7.9125e-16	19	5	1.76718e-11
ENSG00000159261	CLDN14	8.14201e-16	7	4	1.81844e-11
ENSG00000003137	CYP26B1	8.39003e-16	9	6	1.87383e-11
ENSG00000115970	THADA	8.46407e-16	32	6	1.89036e-11
ENSG00000121075	TBX4	8.56428e-16	3	3	1.91275e-11
ENSG00000177627	C12orf54	8.89438e-16	42	6	1.98647e-11
ENSG00000176358	TAC4	9.56629e-16	23	2	2.13654e-11
ENSG00000244045	TMEM199	9.78399e-16	47	3	2.18516e-11
ENSG00000163110	PDLIM5	9.92374e-16	28	6	2.21637e-11
ENSG00000012048	BRCA1	1.02769e-15	24	2	2.29524e-11
ENSG00000134825	TMEM258	1.03619e-15	49	2	2.31423e-11
ENSG00000008300	CELSR3	1.05861e-15	23	3	2.3643e-11
ENSG00000164919	COX6C	1.07039e-15	44	3	2.39061e-11
ENSG00000146776	ATXN7L1	1.09461e-15	15	7	2.4447e-11
ENSG00000008710	PKD1	1.12054e-15	31	4	2.50262e-11
ENSG00000181222	POLR2A	1.19723e-15	47	3	2.67389e-11
ENSG00000148297	MED22	1.20012e-15	36	5	2.68035e-11
ENSG00000164889	SLC4A2	1.41865e-15	26	5	3.16842e-11
ENSG00000143947	RPS27A	1.52857e-15	43	5	3.4139e-11
ENSG00000119737	GPR75	1.53283e-15	45	4	3.42341e-11
ENSG00000173641	HSPB7	1.61396e-15	48	5	3.60462e-11
ENSG00000067704	IARS2	1.79698e-15	48	5	4.01337e-11
ENSG00000111911	HINT3	1.81468e-15	49	3	4.05291e-11
ENSG00000109079	TNFAIP1	1.84786e-15	19	4	4.12701e-11
ENSG00000144730	IL17RD	1.87977e-15	40	6	4.19827e-11
ENSG00000118873	RAB3GAP2	1.89129e-15	37	4	4.224e-11
ENSG00000270882	HIST2H4A	1.93117e-15	5	1	4.31307e-11
ENSG00000172640	OR10AD1	1.97604e-15	39	7	4.41329e-11
ENSG00000165752	STK32C	2.03065e-15	46	11	4.53526e-11
ENSG00000104907	TRMT1	2.06558e-15	24	4	4.61327e-11
ENSG00000119630	PGF	2.06913e-15	8	4	4.6212e-11
ENSG00000145002	FAM86B2	2.11276e-15	18	6	4.71863e-11
ENSG00000178252	WDR6	2.29018e-15	49	1	5.11488e-11
ENSG00000069011	PITX1	2.33454e-15	45	5	5.21397e-11
ENSG00000163257	DCAF16	2.36923e-15	49	3	5.29144e-11
ENSG00000157500	APPL1	2.44806e-15	29	6	5.4675e-11
ENSG00000170348	TMED10	2.50438e-15	42	5	5.59328e-11
ENSG00000197361	FBXL22	2.60901e-15	47	4	5.82696e-11
ENSG00000164403	SHROOM1	2.93113e-15	34	4	6.54638e-11
ENSG00000186510	CLCNKA	2.93595e-15	48	4	6.55714e-11
ENSG00000158691	ZSCAN12	3.00338e-15	46	6	6.70775e-11
ENSG00000100138	SNU13	3.21685e-15	23	5	7.18452e-11
ENSG00000111341	MGP	3.27679e-15	47	3	7.31838e-11
ENSG00000030304	MUSK	3.61011e-15	18	7	8.06283e-11
ENSG00000164053	ATRIP	3.6336e-15	48	2	8.11527e-11
ENSG00000177981	ASB8	3.74723e-15	41	3	8.36907e-11
ENSG00000185278	ZBTB37	3.78534e-15	40	4	8.45418e-11
ENSG00000111328	CDK2AP1	3.81041e-15	46	3	8.51018e-11
ENSG00000120942	UBIAD1	3.83203e-15	5	4	8.55847e-11
ENSG00000167566	NCKAP5L	3.9366e-15	29	7	8.792e-11
ENSG00000177875	CCDC184	4.04619e-15	47	4	9.03676e-11
ENSG00000183955	KMT5A	4.07898e-15	48	3	9.11e-11
ENSG00000169683	LRRC45	4.23457e-15	49	2	9.4575e-11
ENSG00000213471	TTLL13P	4.31113e-15	41	3	9.62849e-11
ENSG00000152556	PFKM	4.36371e-15	37	5	9.7459e-11
ENSG00000103197	TSC2	4.42896e-15	40	10	9.89165e-11
ENSG00000213047	DENND1B	4.48119e-15	27	3	1.00083e-10
ENSG00000111339	ART4	4.72275e-15	13	6	1.05478e-10
ENSG00000180999	C1orf105	4.74323e-15	6	5	1.05935e-10
ENSG00000129465	RIPK3	4.80897e-15	48	3	1.07403e-10
ENSG00000197724	PHF2	4.82147e-15	25	6	1.07683e-10
ENSG00000166278	C2	4.92635e-15	18	8	1.10025e-10
ENSG00000160325	CACFD1	5.00254e-15	48	5	1.11727e-10
ENSG00000048471	SNX29	5.37268e-15	41	6	1.19993e-10
ENSG00000104375	STK3	5.41696e-15	40	6	1.20982e-10
ENSG00000100330	MTMR3	5.44824e-15	40	4	1.21681e-10
ENSG00000234127	TRIM26	5.58859e-15	47	6	1.24816e-10
ENSG00000276180	HIST1H4I	5.59053e-15	8	4	1.24859e-10
ENSG00000197903	HIST1H2BK	5.67048e-15	37	5	1.26645e-10
ENSG00000203814	HIST2H2BF	6.0604e-15	29	2	1.35353e-10
ENSG00000132518	GUCY2D	6.26723e-15	22	6	1.39972e-10
ENSG00000128310	GALR3	6.60382e-15	9	2	1.4749e-10
ENSG00000101391	CDK5RAP1	7.10626e-15	18	6	1.58711e-10
ENSG00000256162	SMLR1	7.13811e-15	17	3	1.59423e-10
ENSG00000235109	ZSCAN31	7.5589e-15	46	3	1.68821e-10
ENSG00000152760	TCTEX1D1	7.92989e-15	46	3	1.77106e-10
ENSG00000075426	FOSL2	8.18644e-15	20	7	1.82836e-10
ENSG00000169733	RFNG	8.64778e-15	26	3	1.9314e-10
ENSG00000179111	HES7	8.72206e-15	42	6	1.94799e-10
ENSG00000053371	AKR7A2	8.7371e-15	49	6	1.95134e-10
ENSG00000139624	CERS5	8.98903e-15	48	2	2.00761e-10
ENSG00000100319	ZMAT5	9.02647e-15	34	4	2.01597e-10
ENSG00000163946	FAM208A	9.15513e-15	47	3	2.04471e-10
ENSG00000145216	FIP1L1	9.55502e-15	45	5	2.13402e-10
ENSG00000185432	METTL7A	1.02338e-14	35	6	2.28562e-10
ENSG00000183010	PYCR1	1.0369e-14	20	4	2.3158e-10
ENSG00000163806	SPDYA	1.04281e-14	40	2	2.329e-10
ENSG00000061455	PRDM6	1.04742e-14	44	9	2.33932e-10
ENSG00000139637	C12orf10	1.05356e-14	34	4	2.35301e-10
ENSG00000185386	MAPK11	1.059e-14	44	8	2.36516e-10
ENSG00000125966	MMP24	1.15997e-14	47	4	2.59067e-10
ENSG00000009724	MASP2	1.30126e-14	36	3	2.90623e-10
ENSG00000188786	MTF1	1.32739e-14	43	4	2.9646e-10
ENSG00000156103	MMP16	1.36836e-14	44	4	3.05608e-10
ENSG00000172232	AZU1	1.39054e-14	39	7	3.10562e-10
ENSG00000187961	KLHL17	1.43876e-14	46	3	3.21332e-10
ENSG00000139697	SBNO1	1.47339e-14	47	4	3.29067e-10
ENSG00000128346	C22orf23	1.49776e-14	13	3	3.34509e-10
ENSG00000119640	ACYP1	1.51171e-14	48	3	3.37626e-10
ENSG00000213672	NCKIPSD	1.60113e-14	49	1	3.57596e-10
ENSG00000131470	PSMC3IP	1.61287e-14	22	4	3.60218e-10
ENSG00000064763	FAR2	1.63732e-14	38	6	3.65679e-10
ENSG00000107679	PLEKHA1	1.65303e-14	48	6	3.69188e-10
ENSG00000011105	TSPAN9	1.66415e-14	43	8	3.7167e-10
ENSG00000163050	COQ8A	1.70128e-14	45	6	3.79965e-10
ENSG00000121797	CCRL2	1.71225e-14	30	3	3.82414e-10
ENSG00000186834	HEXIM1	1.74793e-14	48	5	3.90384e-10
ENSG00000005020	SKAP2	1.79471e-14	34	5	4.00831e-10
ENSG00000137944	KYAT3	1.82226e-14	49	3	4.06984e-10
ENSG00000197653	DNAH10	1.84481e-14	37	9	4.1202e-10
ENSG00000204120	GIGYF2	1.87996e-14	47	4	4.1987e-10
ENSG00000052802	MSMO1	1.97784e-14	6	3	4.41731e-10
ENSG00000179044	EXOC3L1	2.06292e-14	48	1	4.60733e-10
ENSG00000108001	EBF3	2.12976e-14	30	6	4.75662e-10
ENSG00000100239	PPP6R2	2.22674e-14	49	7	4.97321e-10
ENSG00000129255	MPDU1	2.50673e-14	45	4	5.59854e-10
ENSG00000068137	PLEKHH3	2.57683e-14	19	3	5.7551e-10
ENSG00000213689	TREX1	2.64465e-14	40	3	5.90655e-10
ENSG00000181019	NQO1	2.78683e-14	29	5	6.22411e-10
ENSG00000079215	SLC1A3	2.81628e-14	37	4	6.28988e-10
ENSG00000090975	PITPNM2	3.0095e-14	34	2	6.72141e-10
ENSG00000145283	SLC10A6	3.2017e-14	45	4	7.15067e-10
ENSG00000169504	CLIC4	3.21283e-14	49	4	7.17554e-10
ENSG00000094914	AAAS	3.23963e-14	26	2	7.23539e-10
ENSG00000149782	PLCB3	3.37752e-14	47	5	7.54336e-10
ENSG00000149187	CELF1	3.53173e-14	46	4	7.88776e-10
ENSG00000131069	ACSS2	3.62401e-14	37	2	8.09386e-10
ENSG00000129467	ADCY4	3.84508e-14	48	2	8.5876e-10
ENSG00000160551	TAOK1	3.92487e-14	49	5	8.7658e-10
ENSG00000161649	CD300LG	4.14824e-14	19	3	9.26468e-10
ENSG00000167964	RAB26	4.26787e-14	45	2	9.53187e-10
ENSG00000141098	GFOD2	4.28349e-14	49	4	9.56674e-10
ENSG00000004939	SLC4A1	4.80686e-14	28	4	1.07356e-09
ENSG00000035862	TIMP2	4.88016e-14	33	4	1.08994e-09
ENSG00000010704	HFE	4.91008e-14	40	4	1.09662e-09
ENSG00000145332	KLHL8	4.92611e-14	44	7	1.1002e-09
ENSG00000143353	LYPLAL1	5.12146e-14	40	3	1.14383e-09
ENSG00000099308	MAST3	5.14056e-14	40	9	1.14809e-09
ENSG00000048462	TNFRSF17	5.3036e-14	27	5	1.18451e-09
ENSG00000055044	NOP58	5.30847e-14	14	2	1.18559e-09
ENSG00000087085	ACHE	5.36447e-14	46	2	1.1981e-09
ENSG00000146197	SCUBE3	5.70353e-14	36	4	1.27383e-09
ENSG00000176678	FOXL1	5.87958e-14	33	6	1.31315e-09
ENSG00000163939	PBRM1	6.20008e-14	41	4	1.38473e-09
ENSG00000123268	ATF1	6.33505e-14	47	3	1.41487e-09
ENSG00000146109	ABT1	6.37044e-14	49	4	1.42277e-09
ENSG00000169894	MUC3A	6.71551e-14	27	5	1.49984e-09
ENSG00000184270	HIST2H2AB	7.8922e-14	1	1	1.76264e-09
ENSG00000100263	RHBDD3	8.32007e-14	48	5	1.8582e-09
ENSG00000132170	PPARG	8.40416e-14	43	4	1.87698e-09
ENSG00000196123	KIAA0895L	8.45417e-14	46	3	1.88816e-09
ENSG00000165424	ZCCHC24	8.48751e-14	19	11	1.8956e-09
ENSG00000183621	ZNF438	8.51985e-14	47	6	1.90282e-09
ENSG00000248487	ABHD14A	8.58513e-14	45	3	1.9174e-09
ENSG00000187166	H1FNT	8.84961e-14	48	3	1.97647e-09
ENSG00000170374	SP7	9.445e-14	24	4	2.10945e-09
ENSG00000173166	RAPH1	9.80318e-14	15	3	2.18944e-09
ENSG00000145020	AMT	1.04783e-13	49	1	2.34022e-09
ENSG00000066084	DIP2B	1.05682e-13	47	5	2.3603e-09
ENSG00000133612	AGAP3	1.09773e-13	43	5	2.45166e-09
ENSG00000107984	DKK1	1.17419e-13	26	8	2.62244e-09
ENSG00000130921	C12orf65	1.17423e-13	48	4	2.62252e-09
ENSG00000134982	APC	1.20181e-13	40	3	2.68412e-09
ENSG00000171488	LRRC8C	1.23519e-13	37	4	2.75868e-09
ENSG00000104112	SCG3	1.27399e-13	46	4	2.84532e-09
ENSG00000136877	FPGS	1.29333e-13	49	5	2.88853e-09
ENSG00000168701	TMEM208	1.32474e-13	6	2	2.95867e-09
ENSG00000180806	HOXC9	1.33902e-13	17	3	2.99057e-09
ENSG00000143970	ASXL2	1.37799e-13	47	5	3.0776e-09
ENSG00000152219	ARL14EP	1.38099e-13	49	3	3.08429e-09
ENSG00000188130	MAPK12	1.50272e-13	49	3	3.35618e-09
ENSG00000038358	EDC4	1.67161e-13	19	3	3.73338e-09
ENSG00000143801	PSEN2	1.68132e-13	47	3	3.75506e-09
ENSG00000137185	ZSCAN9	1.76396e-13	49	3	3.93963e-09
ENSG00000122778	KIAA1549	1.77969e-13	47	2	3.97475e-09
ENSG00000171791	BCL2	1.8126e-13	16	8	4.04826e-09
ENSG00000161956	SENP3	1.91764e-13	42	5	4.28285e-09
ENSG00000108786	HSD17B1	1.96941e-13	47	2	4.39848e-09
ENSG00000161813	LARP4	2.01574e-13	49	3	4.50195e-09
ENSG00000102780	DGKH	2.04009e-13	48	6	4.55634e-09
ENSG00000176125	UFSP1	2.12846e-13	47	3	4.7537e-09
ENSG00000128342	LIF	2.23322e-13	10	5	4.98767e-09
ENSG00000123349	PFDN5	2.26928e-13	8	2	5.06821e-09
ENSG00000134291	TMEM106C	2.29429e-13	49	5	5.12408e-09
ENSG00000166595	FAM96B	2.33487e-13	12	3	5.21471e-09
ENSG00000033100	CHPF2	2.34517e-13	45	5	5.2377e-09
ENSG00000178449	COX14	2.35552e-13	45	2	5.26081e-09
ENSG00000140718	FTO	2.45804e-13	41	6	5.48979e-09
ENSG00000115825	PRKD3	2.46244e-13	45	5	5.49961e-09
ENSG00000196588	MKL1	2.54694e-13	44	3	5.68832e-09
ENSG00000198373	WWP2	2.58998e-13	32	4	5.78446e-09
ENSG00000073792	IGF2BP2	2.6568e-13	7	3	5.93369e-09
ENSG00000274290	HIST1H2BE	2.71474e-13	27	2	6.0631e-09
ENSG00000119703	ZC2HC1C	2.75671e-13	23	3	6.15685e-09
ENSG00000172831	CES2	2.79954e-13	29	4	6.25249e-09
ENSG00000187837	HIST1H1C	2.86191e-13	49	5	6.39178e-09
ENSG00000162813	BPNT1	3.08346e-13	39	6	6.8866e-09
ENSG00000278828	HIST1H3H	3.19726e-13	4	2	7.14076e-09
ENSG00000196666	FAM180B	3.22191e-13	45	4	7.19582e-09
ENSG00000187772	LIN28B	3.34868e-13	10	2	7.47893e-09
ENSG00000083097	DOPEY1	3.75166e-13	49	2	8.37895e-09
ENSG00000143740	SNAP47	3.75285e-13	41	4	8.38162e-09
ENSG00000137449	CPEB2	3.79946e-13	48	4	8.48572e-09
ENSG00000131095	GFAP	3.8393e-13	17	5	8.57469e-09
ENSG00000152592	DMP1	3.87494e-13	5	3	8.65428e-09
ENSG00000119638	NEK9	4.01888e-13	48	3	8.97577e-09
ENSG00000109084	TMEM97	4.04708e-13	49	4	9.03875e-09
ENSG00000126432	PRDX5	4.14392e-13	49	4	9.25503e-09
ENSG00000182858	ALG12	4.21472e-13	43	3	9.41317e-09
ENSG00000164920	OSR2	4.24018e-13	36	3	9.47003e-09
ENSG00000090447	TFAP4	4.43568e-13	14	4	9.90664e-09
ENSG00000181450	ZNF678	4.4903e-13	41	3	1.00286e-08
ENSG00000095370	SH2D3C	4.5647e-13	12	4	1.01948e-08
ENSG00000129226	CD68	4.58602e-13	22	4	1.02424e-08
ENSG00000099860	GADD45B	5.03327e-13	23	9	1.12413e-08
ENSG00000115138	POMC	5.19968e-13	22	6	1.1613e-08
ENSG00000167716	WDR81	5.20401e-13	40	11	1.16226e-08
ENSG00000100124	ANKRD54	5.30279e-13	42	2	1.18433e-08
ENSG00000186765	FSCN2	5.60885e-13	44	9	1.25268e-08
ENSG00000134376	CRB1	5.79959e-13	5	4	1.29528e-08
ENSG00000128285	MCHR1	5.85155e-13	40	5	1.30689e-08
ENSG00000204713	TRIM27	6.20057e-13	49	5	1.38484e-08
ENSG00000087087	SRRT	6.20095e-13	48	2	1.38492e-08
ENSG00000178096	BOLA1	6.2064e-13	18	2	1.38614e-08
ENSG00000108821	COL1A1	6.44422e-13	35	5	1.43925e-08
ENSG00000168374	ARF4	6.47153e-13	49	5	1.44535e-08
ENSG00000099822	HCN2	6.6717e-13	20	14	1.49006e-08
ENSG00000127084	FGD3	6.87844e-13	45	5	1.53623e-08
ENSG00000169718	DUS1L	6.90618e-13	22	6	1.54243e-08
ENSG00000110536	PTPMT1	6.9284e-13	49	3	1.54739e-08
ENSG00000197245	FAM110D	7.30941e-13	47	2	1.63248e-08
ENSG00000204618	RNF39	7.51301e-13	45	7	1.67796e-08
ENSG00000173068	BNC2	7.58723e-13	39	8	1.69453e-08
ENSG00000135722	FBXL8	7.61266e-13	6	1	1.70021e-08
ENSG00000100350	FOXRED2	7.74135e-13	49	3	1.72895e-08
ENSG00000055955	ITIH4	8.09317e-13	49	2	1.80753e-08
ENSG00000135318	NT5E	8.13659e-13	44	5	1.81723e-08
ENSG00000174844	DNAH12	8.17106e-13	26	4	1.82492e-08
ENSG00000149516	MS4A3	8.18409e-13	4	2	1.82784e-08
ENSG00000161682	FAM171A2	8.23814e-13	48	3	1.83991e-08
ENSG00000125337	KIF25	8.30111e-13	47	7	1.85397e-08
ENSG00000143368	SF3B4	8.46663e-13	30	1	1.89094e-08
ENSG00000185043	CIB1	8.66516e-13	49	3	1.93528e-08
ENSG00000157150	TIMP4	8.70164e-13	37	6	1.94342e-08
ENSG00000175707	KDF1	8.77534e-13	16	3	1.95988e-08
ENSG00000236782	RP11-96L14.7	9.56727e-13	37	4	2.13675e-08
ENSG00000160401	CFAP157	9.658e-13	25	7	2.15702e-08
ENSG00000182600	C2orf82	1.05669e-12	47	4	2.36002e-08
ENSG00000100241	SBF1	1.08348e-12	45	8	2.41985e-08
ENSG00000108819	PPP1R9B	1.10064e-12	25	3	2.45817e-08
ENSG00000204616	TRIM31	1.13112e-12	17	6	2.52624e-08
ENSG00000141030	COPS3	1.14674e-12	48	2	2.56113e-08
ENSG00000102753	KPNA3	1.14827e-12	41	6	2.56455e-08
ENSG00000023892	DEF6	1.19912e-12	48	3	2.67811e-08
ENSG00000181284	TMEM102	1.218e-12	37	4	2.72028e-08
ENSG00000139055	ERP27	1.23028e-12	49	2	2.74772e-08
ENSG00000100664	EIF5	1.24575e-12	35	3	2.78226e-08
ENSG00000172457	OR9G4	1.25672e-12	1	1	2.80675e-08
ENSG00000196504	PRPF40A	1.26506e-12	21	3	2.82537e-08
ENSG00000146147	MLIP	1.28755e-12	43	9	2.87562e-08
ENSG00000118046	STK11	1.30394e-12	28	4	2.91222e-08
ENSG00000092020	PPP2R3C	1.30661e-12	49	4	2.91818e-08
ENSG00000178404	CEP295NL	1.38681e-12	27	4	3.09729e-08
ENSG00000139574	NPFF	1.44385e-12	15	4	3.2247e-08
ENSG00000142657	PGD	1.46915e-12	48	5	3.28121e-08
ENSG00000272573	MUSTN1	1.49269e-12	44	5	3.33376e-08
ENSG00000167550	RHEBL1	1.56105e-12	46	2	3.48645e-08
ENSG00000167513	CDT1	1.58978e-12	27	5	3.55062e-08
ENSG00000104897	SF3A2	1.7117e-12	19	7	3.82291e-08
ENSG00000135111	TBX3	1.7151e-12	10	7	3.8305e-08
ENSG00000179256	SMCO3	1.74025e-12	46	6	3.88666e-08
ENSG00000142039	CCDC97	1.89781e-12	48	2	4.23857e-08
ENSG00000168792	ABHD15	1.96255e-12	47	6	4.38316e-08
ENSG00000163823	CCR1	2.04611e-12	47	2	4.56978e-08
ENSG00000126391	FRMD8	2.05066e-12	5	3	4.57994e-08
ENSG00000184164	CRELD2	2.05401e-12	38	4	4.58743e-08
ENSG00000185090	MANEAL	2.06565e-12	19	3	4.61343e-08
ENSG00000156603	MED19	2.10501e-12	49	4	4.70132e-08
ENSG00000150433	TMEM218	2.11854e-12	44	5	4.73154e-08
ENSG00000100147	CCDC134	2.12568e-12	45	3	4.74749e-08
ENSG00000169727	GPS1	2.14648e-12	44	5	4.79395e-08
ENSG00000083720	OXCT1	2.14687e-12	39	2	4.79481e-08
ENSG00000198944	SOWAHA	2.20252e-12	10	4	4.9191e-08
ENSG00000155506	LARP1	2.21263e-12	38	6	4.9417e-08
ENSG00000033050	ABCF2	2.22304e-12	43	5	4.96493e-08
ENSG00000172053	QARS	2.24162e-12	7	1	5.00643e-08
ENSG00000160791	CCR5	2.26091e-12	46	5	5.04951e-08
ENSG00000105996	HOXA2	2.37394e-12	7	4	5.30195e-08
ENSG00000167523	SPATA33	2.39036e-12	29	4	5.33864e-08
ENSG00000159164	SV2A	2.61008e-12	42	1	5.82934e-08
ENSG00000187260	WDR86	2.61026e-12	46	6	5.82976e-08
ENSG00000266074	BAHCC1	2.62564e-12	45	6	5.8641e-08
ENSG00000198218	QRICH1	2.72364e-12	49	2	6.08297e-08
ENSG00000128165	ADM2	2.75761e-12	14	9	6.15886e-08
ENSG00000115474	KCNJ13	2.7848e-12	25	4	6.21958e-08
ENSG00000050405	LIMA1	2.87343e-12	48	3	6.41753e-08
ENSG00000142798	HSPG2	2.9157e-12	40	4	6.51192e-08
ENSG00000172590	MRPL52	2.93581e-12	46	4	6.55685e-08
ENSG00000136807	CDK9	2.93998e-12	20	4	6.56614e-08
ENSG00000110090	CPT1A	3.04627e-12	16	5	6.80354e-08
ENSG00000167183	PRR15L	3.2267e-12	49	5	7.20651e-08
ENSG00000120029	C10orf76	3.26121e-12	48	6	7.28359e-08
ENSG00000131055	COX4I2	3.31843e-12	43	1	7.41139e-08
ENSG00000176635	HORMAD2	3.33429e-12	14	2	7.44681e-08
ENSG00000170836	PPM1D	3.35196e-12	3	2	7.48628e-08
ENSG00000147676	MAL2	3.61423e-12	29	5	8.07203e-08
ENSG00000122378	FAM213A	3.74399e-12	36	5	8.36183e-08
ENSG00000204060	FOXO6	3.84097e-12	24	9	8.57841e-08
ENSG00000130957	FBP2	3.87413e-12	33	3	8.65248e-08
ENSG00000170430	MGMT	3.9227e-12	49	2	8.76095e-08
ENSG00000173599	PC	4.12414e-12	49	3	9.21085e-08
ENSG00000163681	SLMAP	4.12527e-12	26	4	9.21338e-08
ENSG00000093144	ECHDC1	4.2042e-12	44	7	9.38965e-08
ENSG00000171552	BCL2L1	4.26542e-12	41	2	9.52639e-08
ENSG00000065054	SLC9A3R2	4.37292e-12	16	8	9.76649e-08
ENSG00000197576	HOXA4	4.44727e-12	37	4	9.93253e-08
ENSG00000151748	SAV1	4.47475e-12	39	5	9.9939e-08
ENSG00000128408	RIBC2	4.57746e-12	46	3	1.02233e-07
ENSG00000197982	C1orf122	4.63179e-12	38	2	1.03446e-07
ENSG00000198355	PIM3	4.67392e-12	28	5	1.04387e-07
ENSG00000130713	EXOSC2	4.7251e-12	28	6	1.0553e-07
ENSG00000196411	EPHB4	4.75461e-12	44	5	1.06189e-07
ENSG00000173809	TDRD12	5.08625e-12	39	2	1.13596e-07
ENSG00000214435	AS3MT	5.21587e-12	49	3	1.16491e-07
ENSG00000087157	PGS1	5.21854e-12	41	6	1.16551e-07
ENSG00000184677	ZBTB40	5.31192e-12	35	3	1.18636e-07
ENSG00000173153	ESRRA	5.78605e-12	5	3	1.29226e-07
ENSG00000187583	PLEKHN1	5.84466e-12	45	7	1.30535e-07
ENSG00000112033	PPARD	5.85629e-12	47	3	1.30794e-07
ENSG00000008294	SPAG9	5.90537e-12	46	3	1.3189e-07
ENSG00000239697	TNFSF12	5.95641e-12	46	4	1.33031e-07
ENSG00000111424	VDR	5.96716e-12	46	7	1.33271e-07
ENSG00000141429	GALNT1	6.14125e-12	43	5	1.37159e-07
ENSG00000276368	HIST1H2AJ	6.20436e-12	2	1	1.38568e-07
ENSG00000175356	SCUBE2	6.24033e-12	46	10	1.39372e-07
ENSG00000087494	PTHLH	6.63952e-12	11	10	1.48287e-07
ENSG00000135476	ESPL1	6.69942e-12	43	3	1.49625e-07
ENSG00000196372	ASB13	6.81282e-12	46	11	1.52157e-07
ENSG00000154803	FLCN	6.87888e-12	49	2	1.53633e-07
ENSG00000239887	C1orf226	7.09852e-12	38	12	1.58538e-07
ENSG00000177058	SLC38A9	7.23291e-12	41	7	1.6154e-07
ENSG00000164440	TXLNB	7.32663e-12	45	3	1.63633e-07
ENSG00000214128	TMEM213	7.84887e-12	4	3	1.75297e-07
ENSG00000197563	PIGN	7.93333e-12	49	4	1.77183e-07
ENSG00000006283	CACNA1G	7.96969e-12	35	5	1.77995e-07
ENSG00000172346	CSDC2	7.9745e-12	48	4	1.78103e-07
ENSG00000120075	HOXB5	8.02933e-12	32	3	1.79327e-07
ENSG00000037042	TUBG2	8.06166e-12	48	4	1.80049e-07
ENSG00000184357	HIST1H1B	8.5421e-12	8	2	1.90779e-07
ENSG00000172059	KLF11	8.61374e-12	26	8	1.92379e-07
ENSG00000082805	ERC1	8.7189e-12	37	12	1.94728e-07
ENSG00000065029	ZNF76	9.38348e-12	18	2	2.09571e-07
ENSG00000165923	AGBL2	9.45441e-12	48	3	2.11155e-07
ENSG00000185829	ARL17A	9.57926e-12	30	4	2.13943e-07
ENSG00000182768	NGRN	9.71803e-12	48	5	2.17042e-07
ENSG00000151876	FBXO4	1.02636e-11	43	2	2.29228e-07
ENSG00000135636	DYSF	1.02687e-11	31	9	2.29341e-07
ENSG00000111325	OGFOD2	1.03943e-11	33	4	2.32146e-07
ENSG00000125633	CCDC93	1.05346e-11	49	4	2.35281e-07
ENSG00000109472	CPE	1.06154e-11	45	7	2.37085e-07
ENSG00000163251	FZD5	1.06559e-11	20	5	2.3799e-07
ENSG00000163935	SFMBT1	1.06654e-11	48	5	2.38201e-07
ENSG00000187626	ZKSCAN4	1.07152e-11	43	3	2.39314e-07
ENSG00000204435	CSNK2B	1.08853e-11	45	6	2.43111e-07
ENSG00000197714	ZNF460	1.11621e-11	15	4	2.49295e-07
ENSG00000108465	CDK5RAP3	1.11851e-11	49	3	2.49808e-07
ENSG00000141101	NOB1	1.12477e-11	40	4	2.51205e-07
ENSG00000108312	UBTF	1.16223e-11	48	3	2.59572e-07
ENSG00000204642	HLA-F	1.18342e-11	45	4	2.64304e-07
ENSG00000170876	TMEM43	1.1922e-11	45	5	2.66266e-07
ENSG00000198865	CCDC152	1.21318e-11	44	4	2.70953e-07
ENSG00000254636	ARMS2	1.26868e-11	34	3	2.83346e-07
ENSG00000179833	SERTAD2	1.26894e-11	35	2	2.83406e-07
ENSG00000166033	HTRA1	1.30964e-11	44	8	2.92495e-07
ENSG00000170178	HOXD12	1.31375e-11	1	1	2.93412e-07
ENSG00000198961	PJA2	1.33363e-11	48	4	2.97854e-07
ENSG00000151704	KCNJ1	1.39261e-11	29	9	3.11026e-07
ENSG00000149547	EI24	1.49226e-11	49	5	3.33281e-07
ENSG00000054392	HHAT	1.53957e-11	39	8	3.43847e-07
ENSG00000149136	SSRP1	1.55238e-11	49	3	3.46708e-07
ENSG00000153214	TMEM87B	1.59326e-11	48	5	3.55839e-07
ENSG00000133111	RFXAP	1.59678e-11	13	6	3.56625e-07
ENSG00000150967	ABCB9	1.60238e-11	47	3	3.57875e-07
ENSG00000174840	PDE12	1.64268e-11	49	3	3.66875e-07
ENSG00000173898	SPTBN2	1.65149e-11	8	4	3.68843e-07
ENSG00000160256	FAM207A	1.77837e-11	49	8	3.97182e-07
ENSG00000160870	CYP3A7	1.8572e-11	9	3	4.14786e-07
ENSG00000136068	FLNB	1.89037e-11	29	10	4.22194e-07
ENSG00000180447	GAS1	1.89379e-11	35	3	4.2296e-07
ENSG00000162241	SLC25A45	1.98381e-11	38	6	4.43064e-07
ENSG00000007866	TEAD3	1.99712e-11	24	5	4.46036e-07
ENSG00000100139	MICALL1	2.00081e-11	22	4	4.46862e-07
ENSG00000100426	ZBED4	2.00292e-11	48	4	4.47333e-07
ENSG00000167971	CASKIN1	2.07302e-11	39	4	4.62987e-07
ENSG00000183208	GDPGP1	2.08003e-11	48	2	4.64554e-07
ENSG00000173511	VEGFB	2.14692e-11	25	5	4.79493e-07
ENSG00000116017	ARID3A	2.18049e-11	31	10	4.86992e-07
ENSG00000102760	RGCC	2.21133e-11	35	4	4.93878e-07
ENSG00000183914	DNAH2	2.25081e-11	34	7	5.02696e-07
ENSG00000131196	NFATC1	2.30595e-11	29	7	5.15011e-07
ENSG00000182957	SPATA13	2.32487e-11	40	14	5.19237e-07
ENSG00000160796	NBEAL2	2.33611e-11	48	2	5.21748e-07
ENSG00000002919	SNX11	2.40924e-11	47	2	5.38079e-07
ENSG00000198929	NOS1AP	2.48555e-11	28	6	5.55123e-07
ENSG00000163947	ARHGEF3	2.57023e-11	37	5	5.74036e-07
ENSG00000165140	FBP1	2.60608e-11	46	4	5.82042e-07
ENSG00000100106	TRIOBP	2.6884e-11	47	4	6.00426e-07
ENSG00000148702	HABP2	2.73504e-11	9	6	6.10844e-07
ENSG00000204475	NCR3	2.82384e-11	40	7	6.30677e-07
ENSG00000173992	CCS	2.85353e-11	39	4	6.37308e-07
ENSG00000107186	MPDZ	2.91665e-11	47	4	6.51405e-07
ENSG00000186868	MAPT	3.05771e-11	16	3	6.8291e-07
ENSG00000184178	SCFD2	3.08705e-11	44	5	6.89462e-07
ENSG00000233822	HIST1H2BN	3.08829e-11	44	2	6.8974e-07
ENSG00000132740	IGHMBP2	3.10795e-11	48	3	6.94129e-07
ENSG00000123407	HOXC12	3.12194e-11	9	4	6.97255e-07
ENSG00000167107	ACSF2	3.19819e-11	49	6	7.14283e-07
ENSG00000166793	YPEL4	3.2332e-11	28	4	7.22104e-07
ENSG00000087253	LPCAT2	3.33619e-11	44	3	7.45104e-07
ENSG00000154767	XPC	3.462e-11	47	5	7.73202e-07
ENSG00000133639	BTG1	3.49684e-11	46	5	7.80985e-07
ENSG00000139219	COL2A1	3.64416e-11	8	4	8.13887e-07
ENSG00000164405	UQCRQ	3.64975e-11	41	3	8.15135e-07
ENSG00000165471	MBL2	3.71134e-11	3	3	8.2889e-07
ENSG00000120948	TARDBP	3.77521e-11	45	5	8.43154e-07
ENSG00000138468	SENP7	3.79969e-11	47	3	8.48622e-07
ENSG00000124614	RPS10	3.89798e-11	49	4	8.70575e-07
ENSG00000120071	KANSL1	3.91879e-11	7	3	8.75222e-07
ENSG00000112773	FAM46A	3.93589e-11	17	5	8.79041e-07
ENSG00000161955	TNFSF13	3.96041e-11	44	6	8.84518e-07
ENSG00000185499	MUC1	4.15403e-11	42	3	9.27761e-07
ENSG00000181472	ZBTB2	4.17182e-11	28	2	9.31733e-07
ENSG00000163219	ARHGAP25	4.19536e-11	44	6	9.36991e-07
ENSG00000181418	DDN	4.22644e-11	48	1	9.43934e-07
ENSG00000215906	LACTBL1	4.2781e-11	1	1	9.5547e-07
ENSG00000204610	TRIM15	4.37381e-11	11	4	9.76846e-07
ENSG00000101294	HM13	4.55924e-11	1	1	1.01826e-06
ENSG00000136630	HLX	4.57459e-11	29	5	1.02169e-06
ENSG00000134287	ARF3	4.59301e-11	49	4	1.0258e-06
ENSG00000125753	VASP	4.60206e-11	39	3	1.02782e-06
ENSG00000185651	UBE2L3	4.70791e-11	15	1	1.05146e-06
ENSG00000168268	NT5DC2	4.75834e-11	48	4	1.06273e-06
ENSG00000142046	TMEM91	4.79716e-11	45	4	1.0714e-06
ENSG00000088325	TPX2	4.8361e-11	45	5	1.08009e-06
ENSG00000172927	MYEOV	4.96897e-11	33	6	1.10977e-06
ENSG00000180329	CCDC43	5.03199e-11	15	4	1.12384e-06
ENSG00000087077	TRIP6	5.28226e-11	48	5	1.17974e-06
ENSG00000167522	ANKRD11	5.3454e-11	7	4	1.19384e-06
ENSG00000204394	VARS	5.35261e-11	35	5	1.19545e-06
ENSG00000141655	TNFRSF11A	5.46996e-11	48	4	1.22166e-06
ENSG00000146839	ZAN	5.86629e-11	4	3	1.31018e-06
ENSG00000129315	CCNT1	6.22206e-11	44	4	1.38963e-06
ENSG00000118922	KLF12	6.35469e-11	30	8	1.41926e-06
ENSG00000139223	ANP32D	6.45884e-11	6	3	1.44252e-06
ENSG00000204580	DDR1	6.65334e-11	46	8	1.48596e-06
ENSG00000124942	AHNAK	6.66433e-11	18	3	1.48841e-06
ENSG00000123388	HOXC11	7.00501e-11	4	3	1.5645e-06
ENSG00000123094	RASSF8	7.22369e-11	44	7	1.61334e-06
ENSG00000139620	KANSL2	7.27367e-11	49	2	1.6245e-06
ENSG00000110717	NDUFS8	7.28742e-11	33	4	1.62757e-06
ENSG00000163660	CCNL1	7.32057e-11	48	5	1.63498e-06
ENSG00000188976	NOC2L	7.35784e-11	47	5	1.6433e-06
ENSG00000070886	EPHA8	7.37832e-11	22	8	1.64787e-06
ENSG00000173757	STAT5B	7.68633e-11	47	2	1.71667e-06
ENSG00000178965	ERICH3	7.77732e-11	10	8	1.73699e-06
ENSG00000100314	CABP7	7.92844e-11	7	5	1.77074e-06
ENSG00000171914	TLN2	7.94199e-11	36	5	1.77376e-06
ENSG00000100359	SGSM3	7.96496e-11	12	4	1.77889e-06
ENSG00000182685	BRICD5	8.20425e-11	46	5	1.83234e-06
ENSG00000117501	MROH9	8.39329e-11	1	1	1.87456e-06
ENSG00000163235	TGFA	8.7165e-11	38	6	1.94674e-06
ENSG00000121068	TBX2	9.67146e-11	48	2	2.16002e-06
ENSG00000162595	DIRAS3	9.773e-11	45	3	2.1827e-06
ENSG00000158865	SLC5A11	9.78646e-11	47	3	2.18571e-06
ENSG00000103202	NME4	9.82086e-11	47	3	2.19339e-06
ENSG00000163462	TRIM46	9.8887e-11	18	2	2.20854e-06
ENSG00000054523	KIF1B	9.91512e-11	49	5	2.21444e-06
ENSG00000126561	STAT5A	9.94225e-11	7	3	2.2205e-06
ENSG00000110057	UNC93B1	1.01311e-10	47	4	2.26269e-06
ENSG00000120693	SMAD9	1.04413e-10	49	4	2.33197e-06
ENSG00000090621	PABPC4	1.0487e-10	46	7	2.34216e-06
ENSG00000107341	UBE2R2	1.08287e-10	39	4	2.41848e-06
ENSG00000172985	SH3RF3	1.09055e-10	24	8	2.43563e-06
ENSG00000204619	PPP1R11	1.10133e-10	42	8	2.45971e-06
ENSG00000103769	RAB11A	1.1209e-10	34	4	2.50343e-06
ENSG00000100348	TXN2	1.14043e-10	40	5	2.54704e-06
ENSG00000143776	CDC42BPA	1.151e-10	46	6	2.57064e-06
ENSG00000108256	NUFIP2	1.16012e-10	40	5	2.59101e-06
ENSG00000183625	CCR3	1.16442e-10	6	4	2.60062e-06
ENSG00000103549	RNF40	1.16639e-10	40	3	2.60502e-06
ENSG00000101306	MYLK2	1.20054e-10	45	4	2.6813e-06
ENSG00000100280	AP1B1	1.20731e-10	37	5	2.6964e-06
ENSG00000146872	TLK2	1.21392e-10	9	2	2.71117e-06
ENSG00000153391	INO80C	1.24533e-10	49	6	2.78132e-06
ENSG00000186660	ZFP91	1.25698e-10	39	4	2.80735e-06
ENSG00000068120	COASY	1.25923e-10	45	3	2.81235e-06
ENSG00000090273	NUDC	1.27577e-10	43	3	2.8493e-06
ENSG00000204613	TRIM10	1.30869e-10	13	5	2.92283e-06
ENSG00000136930	PSMB7	1.3123e-10	47	2	2.93088e-06
ENSG00000111641	NOP2	1.31414e-10	4	3	2.93499e-06
ENSG00000161180	CCDC116	1.34464e-10	47	2	3.00311e-06
ENSG00000152217	SETBP1	1.36838e-10	10	7	3.05614e-06
ENSG00000128713	HOXD11	1.37437e-10	9	3	3.06952e-06
ENSG00000130950	NUTM2F	1.38213e-10	1	1	3.08685e-06
ENSG00000075711	DLG1	1.3837e-10	19	7	3.09035e-06
ENSG00000170638	TRABD	1.41715e-10	43	8	3.16506e-06
ENSG00000144320	LNPK	1.42433e-10	49	5	3.18109e-06
ENSG00000162191	UBXN1	1.42816e-10	4	3	3.18965e-06
ENSG00000089775	ZBTB25	1.45304e-10	47	3	3.24522e-06
ENSG00000138380	CARF	1.47348e-10	49	4	3.29088e-06
ENSG00000239388	ASB14	1.47738e-10	47	3	3.29958e-06
ENSG00000213533	TMEM110	1.50402e-10	47	2	3.35907e-06
ENSG00000159650	UROC1	1.51079e-10	14	5	3.37421e-06
ENSG00000163938	GNL3	1.52033e-10	49	3	3.3955e-06
ENSG00000204991	SPIRE2	1.52381e-10	41	5	3.40328e-06
ENSG00000196449	YRDC	1.52876e-10	16	6	3.41433e-06
ENSG00000164404	GDF9	1.58993e-10	49	2	3.55095e-06
ENSG00000124678	TCP11	1.64985e-10	39	4	3.68477e-06
ENSG00000110911	SLC11A2	1.6752e-10	47	4	3.7414e-06
ENSG00000131061	ZNF341	1.70012e-10	47	2	3.79705e-06
ENSG00000099785	MARCH2	1.72124e-10	49	2	3.84422e-06
ENSG00000177370	TIMM22	1.75436e-10	34	4	3.91818e-06
ENSG00000158517	NCF1	1.79893e-10	8	5	4.01773e-06
ENSG00000184009	ACTG1	1.83852e-10	30	4	4.10616e-06
ENSG00000107779	BMPR1A	1.84745e-10	44	4	4.12609e-06
ENSG00000184661	CDCA2	1.88027e-10	36	2	4.1994e-06
ENSG00000176971	FIBIN	1.90106e-10	19	4	4.24583e-06
ENSG00000173801	JUP	1.90386e-10	47	5	4.25207e-06
ENSG00000167693	NXN	1.91524e-10	37	16	4.2775e-06
ENSG00000152284	TCF7L1	1.97921e-10	45	7	4.42037e-06
ENSG00000213199	ASIC3	2.00538e-10	42	6	4.47882e-06
ENSG00000134444	KIAA1468	2.04434e-10	48	5	4.56584e-06
ENSG00000153814	JAZF1	2.0496e-10	48	7	4.57758e-06
ENSG00000108439	PNPO	2.06919e-10	44	5	4.62134e-06
ENSG00000196544	BORCS6	2.07211e-10	26	7	4.62784e-06
ENSG00000185033	SEMA4B	2.07379e-10	44	5	4.63161e-06
ENSG00000153208	MERTK	2.11531e-10	48	4	4.72434e-06
ENSG00000100425	BRD1	2.127e-10	13	4	4.75045e-06
ENSG00000161960	EIF4A1	2.18031e-10	14	4	4.86951e-06
ENSG00000106992	AK1	2.18307e-10	22	7	4.87566e-06
ENSG00000121716	PILRB	2.19173e-10	46	1	4.89501e-06
ENSG00000277972	CISD3	2.22543e-10	44	5	4.97028e-06
ENSG00000156599	ZDHHC5	2.25038e-10	42	4	5.02599e-06
ENSG00000135406	PRPH	2.27537e-10	15	5	5.08181e-06
ENSG00000170166	HOXD4	2.28091e-10	22	3	5.09419e-06
ENSG00000186470	BTN3A2	2.2992e-10	49	1	5.13504e-06
ENSG00000196151	WDSUB1	2.32215e-10	49	2	5.18629e-06
ENSG00000171680	PLEKHG5	2.33838e-10	38	7	5.22255e-06
ENSG00000169836	TACR3	2.435e-10	15	3	5.43832e-06
ENSG00000076685	NT5C2	2.44145e-10	48	5	5.45272e-06
ENSG00000003509	NDUFAF7	2.51548e-10	45	7	5.61807e-06
ENSG00000085514	PILRA	2.52234e-10	46	1	5.6334e-06
ENSG00000119616	FCF1	2.57857e-10	44	3	5.75898e-06
ENSG00000084092	NOA1	2.60542e-10	41	4	5.81893e-06
ENSG00000114127	XRN1	2.61234e-10	24	4	5.8344e-06
ENSG00000175906	ARL4D	2.62e-10	45	4	5.8515e-06
ENSG00000138592	USP8	2.64803e-10	46	6	5.91411e-06
ENSG00000139726	DENR	2.66141e-10	17	5	5.94398e-06
ENSG00000197061	HIST1H4C	2.67035e-10	18	2	5.96397e-06
ENSG00000187642	PERM1	2.68633e-10	47	5	5.99964e-06
ENSG00000179921	GPBAR1	2.79218e-10	39	2	6.23607e-06
ENSG00000244754	N4BP2L2	2.84224e-10	48	4	6.34786e-06
ENSG00000133106	EPSTI1	2.86256e-10	43	6	6.39323e-06
ENSG00000108055	SMC3	2.8851e-10	41	5	6.44358e-06
ENSG00000179588	ZFPM1	2.90622e-10	45	9	6.49074e-06
ENSG00000165124	SVEP1	2.98413e-10	37	11	6.66475e-06
ENSG00000108828	VAT1	2.99605e-10	47	4	6.69138e-06
ENSG00000112210	RAB23	3.03603e-10	17	5	6.78068e-06
ENSG00000197345	MRPL21	3.05635e-10	29	4	6.82604e-06
ENSG00000125246	CLYBL	3.10244e-10	49	5	6.929e-06
ENSG00000155903	RASA2	3.11573e-10	38	3	6.95867e-06
ENSG00000172336	POP7	3.13236e-10	36	2	6.99582e-06
ENSG00000099992	TBC1D10A	3.14034e-10	44	4	7.01364e-06
ENSG00000169696	ASPSCR1	3.17697e-10	49	7	7.09544e-06
ENSG00000172354	GNB2	3.18606e-10	49	3	7.11575e-06
ENSG00000149480	MTA2	3.25556e-10	46	3	7.27096e-06
ENSG00000164821	DEFA4	3.28852e-10	15	5	7.34458e-06
ENSG00000189060	H1F0	3.48979e-10	45	3	7.7941e-06
ENSG00000277791	PSMB3	3.50641e-10	47	5	7.83121e-06
ENSG00000179133	C10orf67	3.56887e-10	24	2	7.97072e-06
ENSG00000126603	GLIS2	3.74084e-10	21	7	8.35479e-06
ENSG00000204388	HSPA1B	3.93931e-10	43	6	8.79805e-06
ENSG00000278615	C11orf98	4.02792e-10	37	3	8.99596e-06
ENSG00000253368	TRNP1	4.03436e-10	45	4	9.01035e-06
ENSG00000007968	E2F2	4.05449e-10	15	5	9.0553e-06
ENSG00000139053	PDE6H	4.1091e-10	12	6	9.17727e-06
ENSG00000123066	MED13L	4.11695e-10	46	3	9.19479e-06
ENSG00000160799	CCDC12	4.17626e-10	33	1	9.32726e-06
ENSG00000125944	HNRNPR	4.22482e-10	9	1	9.43571e-06
ENSG00000138411	HECW2	4.46451e-10	48	5	9.97104e-06
ENSG00000117877	CD3EAP	4.47286e-10	48	3	9.98969e-06
ENSG00000114648	KLHL18	4.4829e-10	18	2	1.00121e-05
ENSG00000144426	NBEAL1	4.51547e-10	35	3	1.00848e-05
ENSG00000181555	SETD2	4.76163e-10	47	3	1.06346e-05
ENSG00000164684	ZNF704	4.78483e-10	47	2	1.06864e-05
ENSG00000147697	GSDMC	4.80758e-10	16	6	1.07373e-05
ENSG00000160584	SIK3	4.8514e-10	36	5	1.08351e-05
ENSG00000168071	CCDC88B	4.90649e-10	49	4	1.09582e-05
ENSG00000188938	FAM120AOS	5.13071e-10	49	7	1.14589e-05
ENSG00000130511	SSBP4	5.15293e-10	47	3	1.15085e-05
ENSG00000137309	HMGA1	5.16556e-10	14	2	1.15368e-05
ENSG00000115232	ITGA4	5.26537e-10	39	6	1.17597e-05
ENSG00000183813	CCR4	5.43695e-10	10	3	1.21429e-05
ENSG00000075292	ZNF638	5.45915e-10	35	5	1.21925e-05
ENSG00000214300	SPDYE3	5.6402e-10	41	2	1.25968e-05
ENSG00000065320	NTN1	5.72863e-10	34	9	1.27943e-05
ENSG00000187024	PTRH1	5.81199e-10	40	2	1.29805e-05
ENSG00000136457	CHAD	5.84854e-10	43	5	1.30621e-05
ENSG00000197150	ABCB8	5.86849e-10	48	3	1.31067e-05
ENSG00000133665	DYDC2	5.98355e-10	27	3	1.33637e-05
ENSG00000100697	DICER1	6.05045e-10	31	8	1.35131e-05
ENSG00000162576	MXRA8	6.22081e-10	48	4	1.38936e-05
ENSG00000087502	ERGIC2	6.33455e-10	43	2	1.41476e-05
ENSG00000111348	ARHGDIB	6.34065e-10	47	6	1.41612e-05
ENSG00000100413	POLR3H	6.40827e-10	47	5	1.43122e-05
ENSG00000187942	LDLRAD2	6.60098e-10	29	6	1.47426e-05
ENSG00000131653	TRAF7	6.70275e-10	10	4	1.49699e-05
ENSG00000100353	EIF3D	6.84953e-10	44	6	1.52978e-05
ENSG00000151640	DPYSL4	7.11235e-10	49	3	1.58847e-05
ENSG00000114850	SSR3	7.12098e-10	36	3	1.5904e-05
ENSG00000177917	ARL6IP6	7.14368e-10	49	2	1.59547e-05
ENSG00000125945	ZNF436	7.17332e-10	48	4	1.60209e-05
ENSG00000145041	DCAF1	7.18709e-10	16	2	1.60516e-05
ENSG00000066651	TRMT11	7.34939e-10	38	2	1.64141e-05
ENSG00000127838	PNKD	7.40279e-10	42	2	1.65334e-05
ENSG00000104408	EIF3E	7.54455e-10	34	4	1.685e-05
ENSG00000007168	PAFAH1B1	7.71776e-10	46	2	1.72368e-05
ENSG00000167815	PRDX2	7.76327e-10	49	5	1.73385e-05
ENSG00000134222	PSRC1	7.78337e-10	47	5	1.73834e-05
ENSG00000110092	CCND1	7.98868e-10	38	5	1.78419e-05
ENSG00000153037	SRP19	8.03344e-10	46	3	1.79419e-05
ENSG00000135535	CD164	8.12709e-10	48	7	1.81511e-05
ENSG00000221890	NPTXR	8.34347e-10	48	4	1.86343e-05
ENSG00000174903	RAB1B	8.349e-10	24	5	1.86467e-05
ENSG00000166924	NYAP1	8.37456e-10	42	4	1.87038e-05
ENSG00000108219	TSPAN14	8.38358e-10	39	8	1.87239e-05
ENSG00000173486	FKBP2	8.54556e-10	46	3	1.90856e-05
ENSG00000135926	TMBIM1	8.79051e-10	48	2	1.96327e-05
ENSG00000182782	HCAR2	8.86651e-10	21	6	1.98025e-05
ENSG00000174276	ZNHIT2	8.90239e-10	46	4	1.98826e-05
ENSG00000213619	NDUFS3	9.01012e-10	43	3	2.01232e-05
ENSG00000225614	ZNF469	9.09736e-10	38	12	2.0318e-05
ENSG00000143412	ANXA9	9.11508e-10	49	7	2.03576e-05
ENSG00000143106	PSMA5	9.11835e-10	17	5	2.03649e-05
ENSG00000127837	AAMP	9.12869e-10	41	3	2.0388e-05
ENSG00000112343	TRIM38	9.3364e-10	49	6	2.08519e-05
ENSG00000167965	MLST8	9.40507e-10	44	2	2.10053e-05
ENSG00000116774	OLFML3	9.5265e-10	48	5	2.12765e-05
ENSG00000156218	ADAMTSL3	9.85356e-10	44	8	2.20069e-05
ENSG00000161179	YDJC	1.00643e-09	47	2	2.24777e-05
ENSG00000081692	JMJD4	1.01724e-09	34	5	2.27191e-05
ENSG00000153930	ANKFN1	1.09086e-09	26	3	2.43634e-05
ENSG00000106723	SPIN1	1.11767e-09	44	3	2.49621e-05
ENSG00000100116	GCAT	1.12946e-09	43	3	2.52253e-05
ENSG00000129151	BBOX1	1.13321e-09	21	6	2.53092e-05
ENSG00000189319	FAM53B	1.18058e-09	21	5	2.63671e-05
ENSG00000170236	USP50	1.18497e-09	25	4	2.64651e-05
ENSG00000103599	IQCH	1.20095e-09	47	2	2.6822e-05
ENSG00000186523	FAM86B1	1.2086e-09	35	2	2.69928e-05
ENSG00000125968	ID1	1.22851e-09	23	1	2.74375e-05
ENSG00000139597	N4BP2L1	1.23516e-09	18	7	2.75861e-05
ENSG00000137331	IER3	1.24658e-09	35	9	2.78411e-05
ENSG00000185955	C7orf61	1.27449e-09	41	2	2.84643e-05
ENSG00000090372	STRN4	1.2837e-09	42	3	2.86701e-05
ENSG00000164054	SHISA5	1.30024e-09	43	5	2.90397e-05
ENSG00000163596	ICA1L	1.31124e-09	46	3	2.92852e-05
ENSG00000185716	C16orf52	1.32868e-09	48	3	2.96748e-05
ENSG00000149634	SPATA25	1.36592e-09	44	4	3.05064e-05
ENSG00000104756	KCTD9	1.36795e-09	42	7	3.05519e-05
ENSG00000151135	TMEM263	1.42483e-09	42	2	3.18221e-05
ENSG00000105613	MAST1	1.44499e-09	21	8	3.22724e-05
ENSG00000159871	LYPD5	1.46892e-09	38	7	3.2807e-05
ENSG00000100142	POLR2F	1.48246e-09	7	2	3.31094e-05
ENSG00000100902	PSMA6	1.49956e-09	47	5	3.34911e-05
ENSG00000159593	NAE1	1.52867e-09	48	2	3.41414e-05
ENSG00000146834	MEPCE	1.53608e-09	35	2	3.43067e-05
ENSG00000239282	GATSL3	1.54172e-09	45	5	3.44328e-05
ENSG00000112812	PRSS16	1.58805e-09	38	6	3.54676e-05
ENSG00000127980	PEX1	1.59137e-09	48	2	3.55417e-05
ENSG00000007933	FMO3	1.615e-09	48	7	3.60694e-05
ENSG00000178773	CPNE7	1.62377e-09	38	8	3.62653e-05
ENSG00000010295	IFFO1	1.64081e-09	28	3	3.66459e-05
ENSG00000159256	MORC3	1.65299e-09	48	8	3.69179e-05
ENSG00000213853	EMP2	1.66224e-09	38	5	3.71245e-05
ENSG00000271824	AC009014.3	1.68534e-09	24	1	3.76404e-05
ENSG00000159899	NPR2	1.72576e-09	48	3	3.85432e-05
ENSG00000184999	SLC22A10	1.7369e-09	10	4	3.8792e-05
ENSG00000178878	APOLD1	1.81861e-09	22	4	4.06167e-05
ENSG00000162817	C1orf115	1.84279e-09	48	9	4.11568e-05
ENSG00000100234	TIMP3	1.85176e-09	10	5	4.13573e-05
ENSG00000102763	VWA8	1.88944e-09	47	6	4.21987e-05
ENSG00000166189	HPS6	1.88967e-09	43	2	4.22038e-05
ENSG00000250722	SELENOP	1.90207e-09	35	7	4.24809e-05
ENSG00000116132	PRRX1	1.94917e-09	41	6	4.35328e-05
ENSG00000007384	RHBDF1	2.00202e-09	46	5	4.47132e-05
ENSG00000241370	RPP21	2.03913e-09	41	5	4.55419e-05
ENSG00000064999	ANKS1A	2.05913e-09	48	8	4.59887e-05
ENSG00000196139	AKR1C3	2.09989e-09	38	7	4.68989e-05
ENSG00000083799	CYLD	2.12621e-09	49	6	4.74868e-05
ENSG00000163933	RFT1	2.14856e-09	42	3	4.7986e-05
ENSG00000137252	HCRTR2	2.17592e-09	9	4	4.85971e-05
ENSG00000015413	DPEP1	2.17848e-09	38	7	4.86541e-05
ENSG00000204614	TRIM40	2.18701e-09	8	4	4.88447e-05
ENSG00000156873	PHKG2	2.30342e-09	22	3	5.14446e-05
ENSG00000187860	CCDC157	2.32561e-09	41	5	5.19401e-05
ENSG00000198755	RPL10A	2.35427e-09	49	3	5.25802e-05
ENSG00000138777	PPA2	2.47559e-09	49	6	5.52899e-05
ENSG00000171793	CTPS1	2.50082e-09	43	6	5.58532e-05
ENSG00000148842	CNNM2	2.63865e-09	36	3	5.89316e-05
ENSG00000169228	RAB24	2.65184e-09	45	2	5.92261e-05
ENSG00000198523	PLN	2.70614e-09	47	4	6.04389e-05
ENSG00000100982	PCIF1	2.77285e-09	47	5	6.19288e-05
ENSG00000166598	HSP90B1	2.83752e-09	38	5	6.33733e-05
ENSG00000129521	EGLN3	2.84985e-09	11	6	6.36486e-05
ENSG00000138678	GPAT3	2.85715e-09	12	6	6.38116e-05
ENSG00000053254	FOXN3	2.86974e-09	11	9	6.40928e-05
ENSG00000188782	CATSPER4	2.91425e-09	8	5	6.50869e-05
ENSG00000203685	STUM	2.91723e-09	35	7	6.51534e-05
ENSG00000124762	CDKN1A	2.94735e-09	35	5	6.58261e-05
ENSG00000151224	MAT1A	2.95043e-09	38	4	6.58949e-05
ENSG00000111276	CDKN1B	2.96726e-09	36	5	6.62708e-05
ENSG00000105186	ANKRD27	2.97592e-09	48	2	6.64642e-05
ENSG00000131165	CHMP1A	2.9977e-09	45	6	6.69505e-05
ENSG00000160813	PPP1R35	3.02573e-09	7	3	6.75766e-05
ENSG00000183628	DGCR6	3.0934e-09	26	9	6.90881e-05
ENSG00000156853	ZNF689	3.12265e-09	38	1	6.97413e-05
ENSG00000169231	THBS3	3.23064e-09	49	1	7.21532e-05
ENSG00000138395	CDK15	3.24275e-09	21	4	7.24237e-05
ENSG00000179772	FOXS1	3.25762e-09	41	5	7.27557e-05
ENSG00000175756	AURKAIP1	3.36604e-09	35	5	7.51772e-05
ENSG00000138071	ACTR2	3.44798e-09	45	4	7.70072e-05
ENSG00000172638	EFEMP2	3.46588e-09	49	4	7.7407e-05
ENSG00000108091	CCDC6	3.56466e-09	48	5	7.9613e-05
ENSG00000254772	EEF1G	3.57331e-09	29	2	7.98062e-05
ENSG00000083642	PDS5B	3.59488e-09	49	3	8.02881e-05
ENSG00000142751	GPN2	3.60716e-09	47	2	8.05623e-05
ENSG00000163710	PCOLCE2	3.6376e-09	37	4	8.12421e-05
ENSG00000170860	LSM3	3.73457e-09	30	3	8.34079e-05
ENSG00000078487	ZCWPW1	3.73678e-09	46	5	8.34572e-05
ENSG00000196812	ZSCAN16	3.85632e-09	48	4	8.6127e-05
ENSG00000185347	C14orf80	3.86289e-09	42	7	8.62739e-05
ENSG00000174080	CTSF	3.9149e-09	49	3	8.74354e-05
ENSG00000211584	SLC48A1	3.956e-09	30	8	8.83533e-05
ENSG00000060718	COL11A1	3.98669e-09	17	6	8.90387e-05
ENSG00000177191	B3GNT8	4.05114e-09	49	3	9.04782e-05
ENSG00000179598	PLD6	4.07677e-09	48	6	9.10505e-05
ENSG00000115828	QPCT	4.08576e-09	46	7	9.12514e-05
ENSG00000205937	RNPS1	4.09543e-09	46	2	9.14673e-05
ENSG00000164294	GPX8	4.17262e-09	25	4	9.31912e-05
ENSG00000172840	PDP2	4.20107e-09	39	3	9.38267e-05
ENSG00000116786	PLEKHM2	4.22856e-09	47	3	9.44407e-05
ENSG00000115419	GLS	4.27386e-09	47	4	9.54525e-05
ENSG00000124635	HIST1H2BJ	4.3615e-09	44	2	9.74097e-05
ENSG00000105287	PRKD2	4.40753e-09	49	5	9.84378e-05
ENSG00000185338	SOCS1	4.45001e-09	33	6	9.93866e-05
ENSG00000164808	SPIDR	4.49405e-09	49	4	0.00010037
ENSG00000146670	CDCA5	4.50815e-09	49	3	0.000100685
ENSG00000116983	HPCAL4	4.51095e-09	37	7	0.000100748
ENSG00000019169	MARCO	4.54129e-09	44	3	0.000101425
ENSG00000108576	SLC6A4	4.65053e-09	33	4	0.000103865
ENSG00000149499	EML3	4.78556e-09	49	2	0.000106881
ENSG00000167216	KATNAL2	4.78689e-09	49	4	0.00010691
ENSG00000095739	BAMBI	4.80007e-09	41	5	0.000107205
ENSG00000179292	TMEM151A	4.91701e-09	42	4	0.000109816
ENSG00000021488	SLC7A9	4.96474e-09	48	3	0.000110882
ENSG00000143079	CTTNBP2NL	4.97033e-09	36	4	0.000111007
ENSG00000163466	ARPC2	5.04594e-09	48	2	0.000112696
ENSG00000104884	ERCC2	5.16073e-09	41	4	0.00011526
ENSG00000144152	FBLN7	5.17333e-09	43	5	0.000115541
ENSG00000112337	SLC17A2	5.1874e-09	2	2	0.000115855
ENSG00000106571	GLI3	5.19984e-09	44	8	0.000116133
ENSG00000064989	CALCRL	5.2256e-09	38	3	0.000116709
ENSG00000124743	KLHL31	5.24878e-09	40	6	0.000117226
ENSG00000103657	HERC1	5.42982e-09	42	6	0.00012127
ENSG00000005102	MEOX1	5.57587e-09	33	4	0.000124531
ENSG00000184908	CLCNKB	5.6527e-09	39	6	0.000126247
ENSG00000179841	AKAP5	5.82167e-09	16	4	0.000130021
ENSG00000175938	ORAI3	5.8715e-09	9	4	0.000131134
ENSG00000198563	DDX39B	5.99482e-09	46	9	0.000133888
ENSG00000135127	BICDL1	5.99836e-09	25	2	0.000133967
ENSG00000175054	ATR	6.11819e-09	47	3	0.000136644
ENSG00000204950	LRRC10B	6.11924e-09	19	4	0.000136667
ENSG00000171823	FBXL14	6.37423e-09	35	4	0.000142362
ENSG00000196275	GTF2IRD2	6.40602e-09	18	3	0.000143072
ENSG00000175879	HOXD8	6.41803e-09	18	7	0.00014334
ENSG00000054965	FAM168A	6.44567e-09	24	5	0.000143958
ENSG00000205795	CYS1	6.48065e-09	43	7	0.000144739
ENSG00000173264	GPR137	6.50758e-09	10	3	0.00014534
ENSG00000104412	EMC2	6.50796e-09	37	5	0.000145349
ENSG00000141696	P3H4	6.52778e-09	48	5	0.000145791
ENSG00000073969	NSF	6.85492e-09	5	3	0.000153098
ENSG00000083812	ZNF324	6.88104e-09	32	3	0.000153681
ENSG00000125998	FAM83C	6.95466e-09	8	3	0.000155325
ENSG00000112299	VNN1	6.96717e-09	49	5	0.000155605
ENSG00000168060	NAALADL1	7.04254e-09	21	3	0.000157288
ENSG00000127993	RBM48	7.07473e-09	49	3	0.000158007
ENSG00000136944	LMX1B	7.11842e-09	25	7	0.000158983
ENSG00000100417	PMM1	7.14299e-09	49	4	0.000159532
ENSG00000181264	TMEM136	7.26205e-09	46	2	0.000162191
ENSG00000162623	TYW3	7.28087e-09	49	4	0.000162611
ENSG00000135472	FAIM2	7.34303e-09	44	4	0.000163999
ENSG00000006071	ABCC8	7.43053e-09	46	4	0.000165953
ENSG00000140009	ESR2	7.55828e-09	29	3	0.000168807
ENSG00000196628	TCF4	7.67305e-09	31	3	0.00017137
ENSG00000175262	C1orf127	7.7928e-09	25	7	0.000174044
ENSG00000263001	GTF2I	7.81565e-09	48	2	0.000174555
ENSG00000103018	CYB5B	7.92043e-09	46	4	0.000176895
ENSG00000010438	PRSS3	7.92612e-09	47	6	0.000177022
ENSG00000168612	ZSWIM1	7.9719e-09	47	4	0.000178044
ENSG00000165416	SUGT1	7.98755e-09	49	2	0.000178394
ENSG00000104537	ANXA13	7.99361e-09	31	5	0.000178529
ENSG00000175573	C11orf68	8.00375e-09	46	3	0.000178756
ENSG00000244219	GS1-259H13.2	8.03125e-09	49	2	0.00017937
ENSG00000178175	ZNF366	8.20069e-09	11	2	0.000183154
ENSG00000100979	PLTP	8.21101e-09	49	5	0.000183385
ENSG00000171067	C11orf24	8.23779e-09	34	5	0.000183983
ENSG00000120049	KCNIP2	8.32838e-09	43	4	0.000186006
ENSG00000167637	ZNF283	8.58867e-09	43	3	0.000191819
ENSG00000166866	MYO1A	8.61627e-09	39	4	0.000192436
ENSG00000088205	DDX18	8.62489e-09	43	5	0.000192628
ENSG00000167074	TEF	8.70415e-09	15	1	0.000194399
ENSG00000198900	TOP1	8.72883e-09	45	3	0.00019495
ENSG00000100304	TTLL12	8.81143e-09	49	4	0.000196794
ENSG00000135835	KIAA1614	8.85921e-09	27	6	0.000197861
ENSG00000165917	RAPSN	8.96759e-09	46	4	0.000200282
ENSG00000120370	GORAB	9.11146e-09	49	3	0.000203495
ENSG00000088808	PPP1R13B	9.37683e-09	48	3	0.000209422
ENSG00000122574	WIPF3	9.46646e-09	40	11	0.000211424
ENSG00000156738	MS4A1	9.47254e-09	5	4	0.00021156
ENSG00000126804	ZBTB1	9.59003e-09	45	2	0.000214184
ENSG00000173457	PPP1R14B	9.87993e-09	41	2	0.000220658
ENSG00000185104	FAF1	9.93633e-09	14	5	0.000221918
ENSG00000129625	REEP5	9.99229e-09	49	6	0.000223168
ENSG00000071967	CYBRD1	1.00019e-08	47	4	0.000223383
ENSG00000083807	SLC27A5	1.01074e-08	37	6	0.000225738
ENSG00000169047	IRS1	1.01374e-08	47	6	0.000226408
ENSG00000204922	UQCC3	1.01556e-08	48	2	0.000226815
ENSG00000130338	TULP4	1.01632e-08	39	6	0.000226985
ENSG00000081154	PCNP	1.01709e-08	26	3	0.000227156
ENSG00000204178	TMEM57	1.0196e-08	43	3	0.000227716
ENSG00000166250	CLMP	1.04086e-08	36	4	0.000232466
ENSG00000143363	PRUNE1	1.04296e-08	44	8	0.000232934
ENSG00000156076	WIF1	1.06446e-08	43	8	0.000237736
ENSG00000183150	GPR19	1.07059e-08	42	3	0.000239106
ENSG00000283536	RP11-624J6.2	1.07722e-08	2	2	0.000240587
ENSG00000164402	SEPT8	1.07758e-08	34	5	0.000240667
ENSG00000131584	ACAP3	1.07781e-08	38	4	0.000240719
ENSG00000123080	CDKN2C	1.07942e-08	11	2	0.000241079
ENSG00000163528	CHCHD4	1.10157e-08	49	3	0.000246024
ENSG00000251322	SHANK3	1.10427e-08	30	1	0.000246628
ENSG00000011465	DCN	1.10997e-08	18	5	0.0002479
ENSG00000139668	WDFY2	1.11562e-08	31	5	0.000249163
ENSG00000204381	LAYN	1.13017e-08	47	4	0.000252411
ENSG00000185022	MAFF	1.17106e-08	23	4	0.000261545
ENSG00000128652	HOXD3	1.17627e-08	34	7	0.000262709
ENSG00000258947	TUBB3	1.22162e-08	39	7	0.000272836
ENSG00000132155	RAF1	1.24132e-08	37	3	0.000277237
ENSG00000123179	EBPL	1.2602e-08	49	3	0.000281452
ENSG00000198208	RPS6KL1	1.27117e-08	37	2	0.000283903
ENSG00000166925	TSC22D4	1.27187e-08	48	4	0.00028406
ENSG00000061676	NCKAP1	1.27274e-08	36	4	0.000284253
ENSG00000146039	SLC17A4	1.29632e-08	10	5	0.000289521
ENSG00000143851	PTPN7	1.35902e-08	40	6	0.000303524
ENSG00000066379	ZNRD1	1.39464e-08	48	5	0.000311478
ENSG00000095066	HOOK2	1.4255e-08	38	7	0.000318372
ENSG00000112699	GMDS	1.43079e-08	48	6	0.000319552
ENSG00000189057	FAM111B	1.44937e-08	30	4	0.000323702
ENSG00000100401	RANGAP1	1.45712e-08	48	5	0.000325433
ENSG00000171490	RSL1D1	1.47006e-08	47	5	0.000328322
ENSG00000117682	DHDDS	1.50579e-08	48	3	0.000336303
ENSG00000186115	CYP4F2	1.50779e-08	25	6	0.00033675
ENSG00000102796	DHRS12	1.51418e-08	26	7	0.000338177
ENSG00000116882	HAO2	1.51476e-08	3	3	0.000338307
ENSG00000173171	MTX1	1.51801e-08	36	2	0.000339033
ENSG00000166927	MS4A7	1.52513e-08	46	3	0.000340622
ENSG00000113742	CPEB4	1.55453e-08	37	4	0.00034719
ENSG00000120675	DNAJC15	1.56422e-08	48	1	0.000349354
ENSG00000146592	CREB5	1.57371e-08	4	4	0.000351473
ENSG00000204439	C6orf47	1.5751e-08	49	5	0.000351784
ENSG00000172757	CFL1	1.59876e-08	3	2	0.000357067
ENSG00000183831	ANKRD45	1.63229e-08	21	4	0.000364556
ENSG00000172171	TEFM	1.64204e-08	46	2	0.000366733
ENSG00000110958	PTGES3	1.67531e-08	11	4	0.000374164
ENSG00000134508	CABLES1	1.68643e-08	39	7	0.000376647
ENSG00000096996	IL12RB1	1.76234e-08	37	5	0.000393602
ENSG00000203791	METTL10	1.7668e-08	49	2	0.000394598
ENSG00000138439	FAM117B	1.7756e-08	41	4	0.000396562
ENSG00000184076	UQCR10	1.81395e-08	49	4	0.000405129
ENSG00000213719	CLIC1	1.81541e-08	46	6	0.000405453
ENSG00000119408	NEK6	1.87024e-08	37	6	0.000417699
ENSG00000119401	TRIM32	1.92007e-08	49	5	0.000428829
ENSG00000079387	SENP1	1.93442e-08	24	4	0.000432033
ENSG00000026950	BTN3A1	1.9377e-08	48	4	0.000432767
ENSG00000143355	LHX9	1.97546e-08	3	3	0.000441198
ENSG00000160305	DIP2A	2.02878e-08	49	6	0.000453108
ENSG00000181690	PLAG1	2.04505e-08	48	2	0.000456742
ENSG00000148826	NKX6-2	2.04741e-08	21	2	0.000457269
ENSG00000157107	FCHO2	2.05433e-08	35	4	0.000458815
ENSG00000221978	CCNL2	2.05943e-08	38	3	0.000459953
ENSG00000180573	HIST1H2AC	2.08574e-08	40	4	0.000465829
ENSG00000172766	NAA16	2.12623e-08	32	5	0.000474872
ENSG00000105963	ADAP1	2.13732e-08	48	12	0.000477349
ENSG00000033800	PIAS1	2.17456e-08	32	7	0.000485666
ENSG00000157259	GATAD1	2.18646e-08	49	3	0.000488324
ENSG00000110395	CBL	2.19163e-08	42	3	0.000489479
ENSG00000163885	CFAP100	2.19415e-08	25	9	0.000490042
ENSG00000182196	ARL6IP4	2.25412e-08	43	1	0.000503435
ENSG00000175489	LRRC25	2.27932e-08	46	3	0.000509063
ENSG00000107175	CREB3	2.29049e-08	46	5	0.000511559
ENSG00000198315	ZKSCAN8	2.34783e-08	48	6	0.000524365
ENSG00000119682	AREL1	2.368e-08	40	2	0.00052887
ENSG00000066468	FGFR2	2.36952e-08	29	9	0.000529208
ENSG00000137693	YAP1	2.38831e-08	47	3	0.000533404
ENSG00000104889	RNASEH2A	2.41196e-08	39	2	0.000538686
ENSG00000073350	LLGL2	2.42172e-08	46	6	0.000540868
ENSG00000170426	SDR9C7	2.42379e-08	31	3	0.00054133
ENSG00000158417	EIF5B	2.44239e-08	32	3	0.000545484
ENSG00000067208	EVI5	2.46877e-08	49	3	0.000551375
ENSG00000163825	RTP3	2.55831e-08	5	4	0.000571374
ENSG00000149541	B3GAT3	2.57823e-08	49	4	0.000575821
ENSG00000171574	ZNF584	2.59947e-08	46	2	0.000580566
ENSG00000108468	CBX1	2.67722e-08	49	3	0.00059793
ENSG00000101745	ANKRD12	2.67747e-08	46	4	0.000597985
ENSG00000131469	RPL27	2.67825e-08	11	3	0.000598161
ENSG00000184060	ADAP2	2.69556e-08	21	2	0.000602027
ENSG00000148120	C9orf3	2.6994e-08	35	7	0.000602883
ENSG00000118496	FBXO30	2.76545e-08	49	4	0.000617635
ENSG00000248098	BCKDHA	2.79666e-08	49	3	0.000624605
ENSG00000152422	XRCC4	2.83225e-08	40	4	0.000632555
ENSG00000167968	DNASE1L2	2.83743e-08	33	5	0.000633712
ENSG00000066336	SPI1	2.88207e-08	45	3	0.000643681
ENSG00000163975	MELTF	2.88858e-08	35	15	0.000645136
ENSG00000159884	CCDC107	2.96014e-08	49	5	0.000661119
ENSG00000219435	TEX40	3.02353e-08	45	1	0.000675276
ENSG00000127914	AKAP9	3.11239e-08	32	2	0.000695121
ENSG00000171492	LRRC8D	3.11791e-08	45	5	0.000696353
ENSG00000172828	CES3	3.14198e-08	46	3	0.00070173
ENSG00000146648	EGFR	3.14696e-08	46	11	0.000702843
ENSG00000073417	PDE8A	3.23256e-08	48	6	0.000721961
ENSG00000182544	MFSD5	3.25534e-08	49	3	0.000727048
ENSG00000214338	SOGA3	3.26929e-08	46	5	0.000730164
ENSG00000134817	APLNR	3.28579e-08	43	6	0.000733848
ENSG00000146828	SLC12A9	3.33978e-08	44	5	0.000745906
ENSG00000110245	APOC3	3.34187e-08	9	4	0.000746374
ENSG00000138442	WDR12	3.35463e-08	34	2	0.000749224
ENSG00000243364	EFNA4	3.36436e-08	6	5	0.000751396
ENSG00000105610	KLF1	3.36557e-08	8	3	0.000751666
ENSG00000017427	IGF1	3.36656e-08	2	2	0.000751887
ENSG00000198863	RUNDC1	3.52072e-08	16	3	0.000786318
ENSG00000198353	HOXC4	3.58548e-08	29	3	0.00080078
ENSG00000283632	EXOC3L2	3.5871e-08	30	5	0.000801143
ENSG00000166928	MS4A14	3.66585e-08	48	2	0.000818732
ENSG00000173597	SULT1B1	3.72073e-08	48	3	0.000830988
ENSG00000182173	TSEN54	3.74536e-08	47	6	0.000836488
ENSG00000160299	PCNT	3.78315e-08	47	7	0.000844928
ENSG00000114650	SCAP	3.80199e-08	49	5	0.000849136
ENSG00000012983	MAP4K5	3.83265e-08	47	4	0.000855984
ENSG00000050426	LETMD1	3.84483e-08	47	3	0.000858705
ENSG00000196935	SRGAP1	3.88297e-08	47	5	0.000867222
ENSG00000159792	PSKH1	3.95807e-08	31	2	0.000883994
ENSG00000168143	FAM83B	3.95819e-08	17	4	0.000884022
ENSG00000149016	TUT1	3.96183e-08	10	2	0.000884836
ENSG00000183908	LRRC55	4.03307e-08	38	4	0.000900745
ENSG00000083123	BCKDHB	4.03963e-08	49	3	0.000902211
ENSG00000012223	LTF	4.15805e-08	38	3	0.000928658
ENSG00000147586	MRPS28	4.16208e-08	17	3	0.000929558
ENSG00000171467	ZNF318	4.25139e-08	31	6	0.000949506
ENSG00000128709	HOXD9	4.266e-08	27	5	0.000952768
ENSG00000184408	KCND2	4.30793e-08	44	3	0.000962133
ENSG00000175467	SART1	4.34251e-08	12	6	0.000969856
ENSG00000124374	PAIP2B	4.40865e-08	32	8	0.000984628
ENSG00000256713	PGA5	4.42113e-08	12	4	0.000987415
ENSG00000176542	USF3	4.44686e-08	49	2	0.000993161
ENSG00000276293	PIP4K2B	4.45164e-08	33	7	0.000994228
ENSG00000108788	MLX	4.48859e-08	36	3	0.00100248
ENSG00000077935	SMC1B	4.492e-08	23	3	0.00100324
ENSG00000149557	FEZ1	4.56283e-08	46	6	0.00101906
ENSG00000196787	HIST1H2AG	4.5745e-08	28	6	0.00102167
ENSG00000167548	KMT2D	4.59411e-08	2	1	0.00102605
ENSG00000248746	ACTN3	4.60163e-08	22	4	0.00102773
ENSG00000150347	ARID5B	4.70907e-08	32	6	0.00105172
ENSG00000006282	SPATA20	4.71949e-08	49	2	0.00105405
ENSG00000096654	ZNF184	4.73498e-08	40	2	0.00105751
ENSG00000197312	DDI2	4.78585e-08	38	3	0.00106887
ENSG00000137204	SLC22A7	4.7885e-08	21	2	0.00106946
ENSG00000130783	CCDC62	4.80052e-08	32	2	0.00107215
ENSG00000109193	SULT1E1	4.84006e-08	15	5	0.00108098
ENSG00000168916	ZNF608	4.91863e-08	39	9	0.00109853
ENSG00000147677	EIF3H	5.03434e-08	19	3	0.00112437
ENSG00000166592	RRAD	5.08318e-08	3	3	0.00113528
ENSG00000162676	GFI1	5.1124e-08	32	3	0.0011418
ENSG00000166886	NAB2	5.16762e-08	36	3	0.00115414
ENSG00000078177	N4BP2	5.22632e-08	49	5	0.00116725
ENSG00000114491	UMPS	5.24511e-08	49	3	0.00117144
ENSG00000231852	CYP21A2	5.32098e-08	24	7	0.00118839
ENSG00000204694	OR11A1	5.43168e-08	1	1	0.00121311
ENSG00000213145	CRIP1	5.45219e-08	47	5	0.00121769
ENSG00000078043	PIAS2	5.46069e-08	46	4	0.00121959
ENSG00000179284	DAND5	5.50125e-08	36	3	0.00122865
ENSG00000182628	SKA2	5.50733e-08	47	4	0.00123001
ENSG00000188761	BCL2L15	5.56394e-08	38	5	0.00124265
ENSG00000167658	EEF2	5.63046e-08	34	5	0.00125751
ENSG00000242689	CNTF	5.67737e-08	49	2	0.00126798
ENSG00000138622	HCN4	5.71758e-08	2	2	0.00127696
ENSG00000077348	EXOSC5	5.79574e-08	45	6	0.00129442
ENSG00000172260	NEGR1	5.80263e-08	35	2	0.00129596
ENSG00000001630	CYP51A1	5.83797e-08	34	2	0.00130385
ENSG00000146215	CRIP3	6.02221e-08	42	2	0.001345
ENSG00000111642	CHD4	6.07864e-08	37	2	0.0013576
ENSG00000259224	SLC35G6	6.10498e-08	35	2	0.00136349
ENSG00000170509	HSD17B13	6.11982e-08	47	5	0.0013668
ENSG00000087995	METTL2A	6.13897e-08	21	2	0.00137108
ENSG00000074755	ZZEF1	6.20085e-08	47	4	0.0013849
ENSG00000122484	RPAP2	6.24331e-08	39	4	0.00139438
ENSG00000149489	ROM1	6.32785e-08	49	3	0.00141326
ENSG00000133246	PRAM1	6.34643e-08	46	3	0.00141741
ENSG00000155368	DBI	6.36129e-08	47	6	0.00142073
ENSG00000165807	PPP1R36	6.37223e-08	47	5	0.00142317
ENSG00000141013	GAS8	6.44822e-08	49	6	0.00144015
ENSG00000130396	AFDN	6.51416e-08	48	5	0.00145487
ENSG00000120756	PLS1	6.59004e-08	46	3	0.00147182
ENSG00000141002	TCF25	6.62387e-08	44	7	0.00147938
ENSG00000177469	PTRF	6.653e-08	32	6	0.00148588
ENSG00000143418	CERS2	6.84214e-08	47	3	0.00152812
ENSG00000121807	CCR2	6.9174e-08	35	3	0.00154493
ENSG00000135409	AMHR2	6.93102e-08	19	2	0.00154797
ENSG00000277258	PCGF2	6.94785e-08	48	4	0.00155173
ENSG00000169242	EFNA1	7.15018e-08	48	5	0.00159692
ENSG00000123411	IKZF4	7.18986e-08	32	4	0.00160578
ENSG00000168273	SMIM4	7.25652e-08	39	3	0.00162067
ENSG00000114904	NEK4	7.28802e-08	45	1	0.00162771
ENSG00000076201	PTPN23	7.43017e-08	41	1	0.00165945
ENSG00000185269	NOTUM	7.47606e-08	31	1	0.0016697
ENSG00000113578	FGF1	7.49642e-08	48	9	0.00167425
ENSG00000150995	ITPR1	7.50757e-08	21	6	0.00167674
ENSG00000084710	EFR3B	7.64312e-08	46	6	0.00170701
ENSG00000003436	TFPI	7.74738e-08	29	4	0.0017303
ENSG00000163811	WDR43	7.89204e-08	31	4	0.00176261
ENSG00000167264	DUS2	7.95099e-08	49	3	0.00177578
ENSG00000073169	SELENOO	8.02419e-08	47	4	0.00179212
ENSG00000148498	PARD3	8.12188e-08	47	7	0.00181394
ENSG00000130638	ATXN10	8.1613e-08	45	3	0.00182275
ENSG00000025423	HSD17B6	8.40159e-08	35	2	0.00187641
ENSG00000139546	TARBP2	8.44098e-08	46	3	0.00188521
ENSG00000114166	KAT2B	8.5188e-08	44	11	0.00190259
ENSG00000143409	MINDY1	8.61719e-08	26	5	0.00192456
ENSG00000110925	CSRNP2	8.71373e-08	33	3	0.00194613
ENSG00000105329	TGFB1	8.73877e-08	48	3	0.00195172
ENSG00000006704	GTF2IRD1	8.74514e-08	14	6	0.00195314
ENSG00000078114	NEBL	8.79441e-08	37	5	0.00196414
ENSG00000240720	LRRD1	9.13198e-08	34	2	0.00203954
ENSG00000139537	CCDC65	9.1358e-08	49	3	0.00204039
ENSG00000163463	KRTCAP2	9.19986e-08	4	3	0.0020547
ENSG00000105229	PIAS4	9.27282e-08	33	6	0.00207099
ENSG00000169813	HNRNPF	9.30359e-08	48	4	0.00207786
ENSG00000072736	NFATC3	9.43695e-08	48	4	0.00210765
ENSG00000125977	EIF2S2	9.46586e-08	34	2	0.00211411
ENSG00000182504	CEP97	9.51658e-08	17	5	0.00212543
ENSG00000183726	TMEM50A	9.58266e-08	45	3	0.00214019
ENSG00000113088	GZMK	9.63e-08	17	4	0.00215076
ENSG00000170298	LGALS9B	9.84062e-08	9	4	0.0021978
ENSG00000197629	MPEG1	9.89049e-08	48	3	0.00220894
ENSG00000119689	DLST	1.01131e-07	32	4	0.00225867
ENSG00000166856	GPR182	1.01295e-07	40	1	0.00226232
ENSG00000134352	IL6ST	1.01372e-07	36	2	0.00226404
ENSG00000188385	JAKMIP3	1.01753e-07	47	4	0.00227255
ENSG00000172819	RARG	1.01776e-07	3	2	0.00227306
ENSG00000162267	ITIH3	1.01941e-07	29	3	0.00227674
ENSG00000119608	PROX2	1.0425e-07	42	2	0.00232831
ENSG00000175787	ZNF169	1.04932e-07	40	5	0.00234355
ENSG00000165995	CACNB2	1.06138e-07	47	12	0.00237048
ENSG00000105612	DNASE2	1.07243e-07	31	3	0.00239517
ENSG00000241644	INMT	1.08711e-07	29	8	0.00242796
ENSG00000085760	MTIF2	1.10394e-07	45	5	0.00246554
ENSG00000197893	NRAP	1.11963e-07	38	4	0.00250058
ENSG00000143126	CELSR2	1.13149e-07	45	7	0.00252706
ENSG00000135365	PHF21A	1.13746e-07	11	3	0.0025404
ENSG00000171790	SLFNL1	1.14013e-07	48	5	0.00254636
ENSG00000131849	ZNF132	1.18134e-07	49	3	0.0026384
ENSG00000076108	BAZ2A	1.19755e-07	48	2	0.00267461
ENSG00000167077	MEI1	1.20532e-07	45	1	0.00269195
ENSG00000184922	FMNL1	1.22165e-07	25	5	0.00272844
ENSG00000006607	FARP2	1.22553e-07	49	4	0.00273711
ENSG00000187037	GPR141	1.22853e-07	29	3	0.00274379
ENSG00000188672	RHCE	1.25179e-07	49	3	0.00279576
ENSG00000076344	RGS11	1.27471e-07	47	2	0.00284695
ENSG00000116106	EPHA4	1.27546e-07	41	6	0.0028486
ENSG00000086062	B4GALT1	1.31722e-07	38	5	0.00294187
ENSG00000184602	SNN	1.31933e-07	40	7	0.00294658
ENSG00000160838	LRRC71	1.3201e-07	45	3	0.00294831
ENSG00000146376	ARHGAP18	1.32302e-07	21	7	0.00295483
ENSG00000249961	TERB1	1.32715e-07	3	2	0.00296405
ENSG00000116874	WARS2	1.33778e-07	49	2	0.00298781
ENSG00000148848	ADAM12	1.33821e-07	17	8	0.00298876
ENSG00000118197	DDX59	1.3633e-07	48	4	0.0030448
ENSG00000139675	HNRNPA1L2	1.36427e-07	41	2	0.00304696
ENSG00000121690	DEPDC7	1.36826e-07	47	7	0.00305587
ENSG00000146094	DOK3	1.38738e-07	49	3	0.00309858
ENSG00000197114	ZGPAT	1.44744e-07	29	3	0.00323272
ENSG00000111696	NT5DC3	1.45449e-07	48	9	0.00324847
ENSG00000164430	MB21D1	1.47424e-07	49	6	0.00329257
ENSG00000083857	FAT1	1.48837e-07	44	10	0.00332411
ENSG00000137312	FLOT1	1.49246e-07	49	3	0.00333326
ENSG00000172201	ID4	1.50656e-07	15	8	0.00336476
ENSG00000167543	TP53I13	1.52588e-07	49	3	0.00340789
ENSG00000152601	MBNL1	1.5313e-07	34	5	0.00342001
ENSG00000143457	GOLPH3L	1.53384e-07	39	2	0.00342569
ENSG00000156587	UBE2L6	1.53696e-07	46	5	0.00343264
ENSG00000104852	SNRNP70	1.55657e-07	49	3	0.00347643
ENSG00000128159	TUBGCP6	1.57228e-07	46	5	0.00351153
ENSG00000100412	ACO2	1.57361e-07	49	2	0.0035145
ENSG00000198561	CTNND1	1.58892e-07	27	4	0.0035487
ENSG00000117791	MARC2	1.60658e-07	43	5	0.00358814
ENSG00000169241	SLC50A1	1.62181e-07	49	7	0.00362215
ENSG00000070476	ZXDC	1.62784e-07	48	3	0.00363563
ENSG00000187987	ZSCAN23	1.63995e-07	47	2	0.00366266
ENSG00000163349	HIPK1	1.65057e-07	47	7	0.00368638
ENSG00000125970	RALY	1.65231e-07	49	4	0.00369026
ENSG00000203910	C1orf146	1.67261e-07	9	4	0.00373562
ENSG00000139547	RDH16	1.69848e-07	48	5	0.00379339
ENSG00000109339	MAPK10	1.70472e-07	41	3	0.00380732
ENSG00000065413	ANKRD44	1.70573e-07	22	7	0.00380957
ENSG00000178665	ZNF713	1.71639e-07	46	4	0.00383338
ENSG00000150281	CTF1	1.74568e-07	6	4	0.0038988
ENSG00000012660	ELOVL5	1.77548e-07	47	6	0.00396535
ENSG00000166398	KIAA0355	1.7918e-07	47	6	0.0040018
ENSG00000100612	DHRS7	1.80016e-07	48	3	0.00402047
ENSG00000141664	ZCCHC2	1.80153e-07	34	8	0.00402353
ENSG00000151778	SERP2	1.80173e-07	10	7	0.00402398
ENSG00000163629	PTPN13	1.82975e-07	41	3	0.00408657
ENSG00000188177	ZC3H6	1.83052e-07	29	5	0.00408828
ENSG00000180596	HIST1H2BC	1.83056e-07	44	3	0.00408837
ENSG00000213398	LCAT	1.83549e-07	39	3	0.00409938
ENSG00000084731	KIF3C	1.85806e-07	42	5	0.0041498
ENSG00000112425	EPM2A	1.87232e-07	49	4	0.00418164
ENSG00000064313	TAF2	1.87305e-07	49	3	0.00418327
ENSG00000085831	TTC39A	1.89708e-07	49	7	0.00423694
ENSG00000185085	INTS5	1.9018e-07	8	2	0.00424749
ENSG00000113758	DBN1	1.9123e-07	30	5	0.00427094
ENSG00000203896	LIME1	1.92054e-07	48	3	0.00428933
ENSG00000003249	DBNDD1	1.94047e-07	49	7	0.00433384
ENSG00000121579	NAA50	1.94654e-07	34	3	0.00434741
ENSG00000048828	FAM120A	1.95264e-07	35	4	0.00436102
ENSG00000204366	ZBTB12	1.99037e-07	41	5	0.00444529
ENSG00000090612	ZNF268	1.9983e-07	47	4	0.004463
ENSG00000031081	ARHGAP31	2.01404e-07	20	6	0.00449816
ENSG00000164916	FOXK1	2.03009e-07	40	5	0.004534
ENSG00000125755	SYMPK	2.03198e-07	40	7	0.00453822
ENSG00000124257	NEURL2	2.03273e-07	46	7	0.00453991
ENSG00000165916	PSMC3	2.04002e-07	48	3	0.00455619
ENSG00000196531	NACA	2.04728e-07	48	4	0.00457239
ENSG00000184986	TMEM121	2.0506e-07	38	2	0.0045798
ENSG00000107159	CA9	2.06739e-07	45	5	0.0046173
ENSG00000127377	CRYGN	2.10656e-07	32	7	0.0047048
ENSG00000008988	RPS20	2.11114e-07	49	3	0.00471502
ENSG00000138600	SPPL2A	2.11171e-07	48	3	0.0047163
ENSG00000100410	PHF5A	2.12459e-07	17	2	0.00474505
ENSG00000168061	SAC3D1	2.1427e-07	49	3	0.00478552
ENSG00000178966	RMI1	2.16004e-07	49	4	0.00482423
ENSG00000124074	ENKD1	2.16154e-07	48	3	0.00482757
ENSG00000205726	ITSN1	2.16737e-07	22	6	0.0048406
ENSG00000173436	MINOS1	2.19979e-07	47	5	0.004913
ENSG00000103199	ZNF500	2.20326e-07	49	3	0.00492076
ENSG00000118655	DCLRE1B	2.20741e-07	42	5	0.00493002
ENSG00000165915	SLC39A13	2.23575e-07	47	3	0.00499333
ENSG00000090565	RAB11FIP3	2.23631e-07	42	4	0.00499457
ENSG00000108830	RND2	2.24132e-07	45	2	0.00500577
ENSG00000133884	DPF2	2.27809e-07	40	2	0.00508789
ENSG00000243509	TNFRSF6B	2.29071e-07	45	8	0.00511607
ENSG00000184451	CCR10	2.30014e-07	33	2	0.00513714
ENSG00000187955	COL14A1	2.33786e-07	46	5	0.00522138
ENSG00000172215	CXCR6	2.34163e-07	38	4	0.00522979
ENSG00000168140	VASN	2.36304e-07	36	2	0.00527761
ENSG00000196141	SPATS2L	2.38887e-07	49	7	0.0053353
ENSG00000157111	TMEM171	2.39218e-07	36	4	0.0053427
ENSG00000176022	B3GALT6	2.40046e-07	43	2	0.00536119
ENSG00000186652	PRG2	2.44975e-07	45	3	0.00547127
ENSG00000205116	TMEM88B	2.45324e-07	28	5	0.00547907
ENSG00000160917	CPSF4	2.49536e-07	45	3	0.00557313
ENSG00000136098	NEK3	2.54525e-07	48	3	0.00568457
ENSG00000197256	KANK2	2.57972e-07	44	7	0.00576154
ENSG00000083312	TNPO1	2.60033e-07	47	3	0.00580758
ENSG00000183864	TOB2	2.60446e-07	17	2	0.00581681
ENSG00000204438	GPANK1	2.60567e-07	48	8	0.00581951
ENSG00000141084	RANBP10	2.60682e-07	42	1	0.00582208
ENSG00000111913	FAM65B	2.62468e-07	8	6	0.00586196
ENSG00000185739	SRL	2.63321e-07	37	4	0.00588102
ENSG00000165118	C9orf64	2.63815e-07	45	2	0.00589204
ENSG00000103591	AAGAB	2.66863e-07	45	4	0.00596012
ENSG00000140740	UQCRC2	2.67606e-07	34	3	0.00597672
ENSG00000174891	RSRC1	2.67672e-07	47	7	0.00597819
ENSG00000204482	LST1	2.69377e-07	46	7	0.00601626
ENSG00000144021	CIAO1	2.74612e-07	49	2	0.00613319
ENSG00000146047	HIST1H2BA	2.75992e-07	1	1	0.00616401
ENSG00000176531	PHLDB3	2.77496e-07	49	4	0.00619759
ENSG00000114573	ATP6V1A	2.78716e-07	32	2	0.00622483
ENSG00000116138	DNAJC16	2.79465e-07	44	2	0.00624157
ENSG00000070061	IKBKAP	2.80976e-07	48	6	0.00627531
ENSG00000136444	RSAD1	2.81223e-07	49	4	0.00628083
ENSG00000159720	ATP6V0D1	2.82432e-07	48	2	0.00630783
ENSG00000135317	SNX14	2.88326e-07	44	8	0.00643947
ENSG00000149483	TMEM138	2.90501e-07	49	2	0.00648805
ENSG00000146535	GNA12	2.95611e-07	44	3	0.00660217
ENSG00000133316	WDR74	2.95678e-07	31	5	0.00660367
ENSG00000025156	HSF2	2.96084e-07	46	5	0.00661273
ENSG00000242950	ERVW-1	2.96214e-07	26	2	0.00661565
ENSG00000156858	PRR14	2.97474e-07	19	4	0.00664378
ENSG00000160404	TOR2A	3.02673e-07	47	6	0.00675989
ENSG00000221869	CEBPD	3.0308e-07	45	1	0.00676899
ENSG00000169248	CXCL11	3.04586e-07	27	4	0.00680263
ENSG00000120875	DUSP4	3.08911e-07	44	4	0.00689923
ENSG00000138336	TET1	3.09925e-07	42	3	0.00692187
ENSG00000100890	KIAA0391	3.10493e-07	45	4	0.00693455
ENSG00000132535	DLG4	3.13911e-07	48	2	0.00701089
ENSG00000250312	ZNF718	3.16812e-07	49	2	0.00707568
ENSG00000140092	FBLN5	3.17774e-07	43	9	0.00709715
ENSG00000110011	DNAJC4	3.20019e-07	37	4	0.00714731
ENSG00000124782	RREB1	3.22942e-07	27	5	0.00721258
ENSG00000075399	VPS9D1	3.29411e-07	49	3	0.00735707
ENSG00000179859	AC025335.1	3.29503e-07	48	3	0.00735913
ENSG00000164619	BMPER	3.33587e-07	15	8	0.00745033
ENSG00000177628	GBA	3.34203e-07	47	3	0.0074641
ENSG00000182450	KCNK4	3.35703e-07	7	2	0.00749759
ENSG00000135945	REV1	3.36071e-07	44	4	0.00750582
ENSG00000102901	CENPT	3.38679e-07	12	2	0.00756406
ENSG00000214756	METTL12	3.38928e-07	38	1	0.00756961
ENSG00000075234	TTC38	3.4172e-07	47	3	0.00763198
ENSG00000144857	BOC	3.43395e-07	46	14	0.00766938
ENSG00000106665	CLIP2	3.43792e-07	48	4	0.00767824
ENSG00000187634	SAMD11	3.44753e-07	13	6	0.00769971
ENSG00000072786	STK10	3.50049e-07	26	9	0.007818
ENSG00000167720	SRR	3.5036e-07	49	1	0.00782494
ENSG00000039068	CDH1	3.51468e-07	30	4	0.00784969
ENSG00000150687	PRSS23	3.53391e-07	27	9	0.00789264
ENSG00000186132	C2orf76	3.5342e-07	40	5	0.00789329
ENSG00000229859	PGA3	3.5432e-07	15	2	0.00791337
ENSG00000119138	KLF9	3.5525e-07	47	5	0.00793415
ENSG00000166275	BORCS7	3.60372e-07	49	1	0.00804855
ENSG00000167969	ECI1	3.61123e-07	43	2	0.00806532
ENSG00000130584	ZBTB46	3.62677e-07	29	6	0.00810003
ENSG00000143772	ITPKB	3.62984e-07	47	5	0.00810689
ENSG00000161860	SYCE2	3.73922e-07	49	5	0.00835116
ENSG00000170100	ZNF778	3.77245e-07	49	4	0.0084254
ENSG00000094963	FMO2	3.8251e-07	47	6	0.00854297
ENSG00000141510	TP53	3.84583e-07	19	7	0.00858927
ENSG00000160307	S100B	3.85188e-07	45	5	0.00860279
ENSG00000071189	SNX13	3.86958e-07	23	4	0.00864232
ENSG00000102898	NUTF2	3.89701e-07	49	1	0.00870359
ENSG00000205643	CDPF1	3.90555e-07	41	4	0.00872265
ENSG00000256223	ZNF10	4.01329e-07	49	3	0.00896328
ENSG00000163394	CCKAR	4.02345e-07	15	4	0.00898597
ENSG00000167740	CYB5D2	4.06286e-07	48	3	0.00907398
ENSG00000150907	FOXO1	4.07456e-07	10	4	0.00910013
ENSG00000183921	SDR42E2	4.07491e-07	36	4	0.0091009
ENSG00000100416	TRMU	4.13653e-07	42	2	0.00923853
ENSG00000113575	PPP2CA	4.14822e-07	48	3	0.00926464
ENSG00000130876	SLC7A10	4.16139e-07	32	8	0.00929404
ENSG00000172269	DPAGT1	4.18146e-07	19	3	0.00933886
ENSG00000157036	EXOG	4.19497e-07	47	2	0.00936904
ENSG00000156486	KCNS2	4.20032e-07	34	7	0.009381
ENSG00000135956	TMEM127	4.20793e-07	49	2	0.00939799
ENSG00000183258	DDX41	4.21175e-07	35	7	0.00940652
ENSG00000080493	SLC4A4	4.23512e-07	42	2	0.00945872
ENSG00000196419	XRCC6	4.23546e-07	46	3	0.00945948
ENSG00000116062	MSH6	4.26452e-07	39	9	0.00952439
ENSG00000204852	TCTN1	4.32333e-07	22	3	0.00965572
ENSG00000167588	GPD1	4.34464e-07	22	4	0.00970332
ENSG00000204516	MICB	4.39232e-07	49	4	0.00980981
ENSG00000136982	DSCC1	4.39999e-07	49	2	0.00982694
ENSG00000124067	SLC12A4	4.48576e-07	16	3	0.0100185
ENSG00000115239	ASB3	4.48688e-07	48	5	0.010021
ENSG00000198732	SMOC1	4.49629e-07	43	7	0.010042
ENSG00000103152	MPG	4.51228e-07	47	5	0.0100777
ENSG00000181856	SLC2A4	4.51237e-07	49	5	0.0100779
ENSG00000099365	STX1B	4.5263e-07	37	2	0.010109
ENSG00000258839	MC1R	4.53751e-07	47	2	0.0101341
ENSG00000132906	CASP9	4.56215e-07	47	2	0.0101891
ENSG00000197930	ERO1A	4.57637e-07	44	5	0.0102209
ENSG00000108950	FAM20A	4.59183e-07	28	8	0.0102554
ENSG00000197912	SPG7	4.59337e-07	46	4	0.0102588
ENSG00000108960	MMD	4.63611e-07	26	8	0.0103543
ENSG00000118557	PMFBP1	4.65445e-07	40	3	0.0103952
ENSG00000184163	C1QTNF12	4.72355e-07	36	4	0.0105496
ENSG00000082781	ITGB5	4.75407e-07	47	5	0.0106177
ENSG00000112562	SMOC2	4.818e-07	40	10	0.0107605
ENSG00000215788	TNFRSF25	4.85874e-07	35	8	0.0108515
ENSG00000172673	THEMIS	4.8795e-07	8	4	0.0108979
ENSG00000179403	VWA1	4.92096e-07	39	3	0.0109905
ENSG00000185813	PCYT2	4.92208e-07	48	1	0.010993
ENSG00000180346	TIGD2	5.04706e-07	43	5	0.0112721
ENSG00000174206	C12orf66	5.0694e-07	5	3	0.011322
ENSG00000105855	ITGB8	5.07765e-07	15	10	0.0113404
ENSG00000183283	DAZAP2	5.084e-07	27	3	0.0113546
ENSG00000151632	AKR1C2	5.11862e-07	41	8	0.0114319
ENSG00000147459	DOCK5	5.1214e-07	45	6	0.0114381
ENSG00000184560	C17orf74	5.13123e-07	7	2	0.0114601
ENSG00000126803	HSPA2	5.1398e-07	44	5	0.0114792
ENSG00000104881	PPP1R13L	5.16378e-07	47	5	0.0115328
ENSG00000127603	MACF1	5.16503e-07	11	4	0.0115356
ENSG00000100815	TRIP11	5.22556e-07	36	3	0.0116708
ENSG00000157106	SMG1	5.28799e-07	48	3	0.0118102
ENSG00000166272	WBP1L	5.3099e-07	44	6	0.0118591
ENSG00000180336	MEIOC	5.32293e-07	29	4	0.0118882
ENSG00000127989	MTERF1	5.38409e-07	46	2	0.0120248
ENSG00000204859	ZBTB48	5.45482e-07	48	3	0.0121828
ENSG00000100380	ST13	5.46306e-07	23	4	0.0122012
ENSG00000075213	SEMA3A	5.64641e-07	25	4	0.0126107
ENSG00000151090	THRB	5.72454e-07	36	5	0.0127852
ENSG00000111801	BTN3A3	5.72788e-07	45	6	0.0127926
ENSG00000070019	GUCY2C	5.7683e-07	27	5	0.0128829
ENSG00000072778	ACADVL	5.79985e-07	23	2	0.0129534
ENSG00000142675	CNKSR1	5.84783e-07	46	3	0.0130605
ENSG00000132549	VPS13B	5.84854e-07	16	4	0.0130621
ENSG00000174842	GLMN	5.88904e-07	8	3	0.0131526
ENSG00000135720	DYNC1LI2	5.92501e-07	29	3	0.0132329
ENSG00000106113	CRHR2	5.95417e-07	35	5	0.013298
ENSG00000214029	ZNF891	5.97737e-07	48	4	0.0133499
ENSG00000125520	SLC2A4RG	6.00857e-07	47	4	0.0134195
ENSG00000111860	CEP85L	6.09709e-07	46	9	0.0136173
ENSG00000197561	ELANE	6.34097e-07	39	7	0.0141619
ENSG00000165929	TC2N	6.38275e-07	46	3	0.0142552
ENSG00000103319	EEF2K	6.38371e-07	48	4	0.0142574
ENSG00000140374	ETFA	6.41869e-07	47	6	0.0143355
ENSG00000139233	LLPH	6.51741e-07	49	3	0.014556
ENSG00000104774	MAN2B1	6.53404e-07	42	3	0.0145931
ENSG00000106819	ASPN	6.64745e-07	11	5	0.0148464
ENSG00000181885	CLDN7	6.66297e-07	49	7	0.0148811
ENSG00000146143	PRIM2	6.71531e-07	35	2	0.014998
ENSG00000134697	GNL2	6.75919e-07	42	3	0.015096
ENSG00000103496	STX4	6.79439e-07	47	2	0.0151746
ENSG00000177885	GRB2	6.79678e-07	46	5	0.0151799
ENSG00000204472	AIF1	6.83108e-07	45	8	0.0152565
ENSG00000162438	CTRC	6.90454e-07	8	6	0.0154206
ENSG00000165495	PKNOX2	6.91995e-07	20	8	0.015455
ENSG00000183741	CBX6	6.92903e-07	45	4	0.0154753
ENSG00000140937	CDH11	6.95221e-07	19	7	0.0155271
ENSG00000163818	LZTFL1	6.95665e-07	45	5	0.015537
ENSG00000082074	FYB	6.97415e-07	43	7	0.0155761
ENSG00000164683	HEY1	6.99116e-07	8	5	0.0156141
ENSG00000073670	ADAM11	6.99118e-07	43	5	0.0156141
ENSG00000160049	DFFA	7.11825e-07	36	4	0.0158979
ENSG00000150961	SEC24D	7.16417e-07	46	4	0.0160004
ENSG00000170266	GLB1	7.21713e-07	47	8	0.0161187
ENSG00000136895	GARNL3	7.26192e-07	45	5	0.0162188
ENSG00000163661	PTX3	7.37646e-07	24	3	0.0164746
ENSG00000169972	PUSL1	7.39169e-07	43	3	0.0165086
ENSG00000165671	NSD1	7.44375e-07	39	4	0.0166249
ENSG00000127528	KLF2	7.45036e-07	31	6	0.0166396
ENSG00000140993	TIGD7	7.45077e-07	46	2	0.0166406
ENSG00000124574	ABCC10	7.57991e-07	45	7	0.016929
ENSG00000160703	NLRX1	7.61344e-07	48	3	0.0170038
ENSG00000198754	OXCT2	7.69321e-07	28	8	0.017182
ENSG00000168286	THAP11	7.70127e-07	14	2	0.0172
ENSG00000133789	SWAP70	7.70407e-07	48	5	0.0172063
ENSG00000119596	YLPM1	7.71992e-07	12	3	0.0172417
ENSG00000196428	TSC22D2	7.88603e-07	27	5	0.0176127
ENSG00000144455	SUMF1	7.89577e-07	47	2	0.0176344
ENSG00000102981	PARD6A	8.01487e-07	49	3	0.0179004
ENSG00000163682	RPL9	8.03689e-07	41	3	0.0179496
ENSG00000145423	SFRP2	8.0986e-07	43	6	0.0180874
ENSG00000013588	GPRC5A	8.2025e-07	23	7	0.0183195
ENSG00000064601	CTSA	8.20577e-07	36	3	0.0183268
ENSG00000148450	MSRB2	8.28702e-07	38	5	0.0185082
ENSG00000198742	SMURF1	8.29002e-07	48	2	0.0185149
ENSG00000142207	URB1	8.37539e-07	45	5	0.0187056
ENSG00000083838	ZNF446	8.43222e-07	46	4	0.0188325
ENSG00000100253	MIOX	8.55963e-07	15	4	0.0191171
ENSG00000108262	GIT1	8.60118e-07	31	3	0.0192099
ENSG00000167986	DDB1	8.64274e-07	9	2	0.0193027
ENSG00000273899	NOL12	8.64654e-07	47	5	0.0193112
ENSG00000110987	BCL7A	8.64862e-07	23	5	0.0193158
ENSG00000110876	SELPLG	8.6924e-07	34	8	0.0194136
[truncated: 157 more rows]

## Sheet: 1b
Ensembl ID	Cluster Name	Gene Name	RCP	GTEx Tissue
ENSG00000180875	ENSG00000180875:1	GREM2	0.9998	Cells_Cultured_fibroblasts
ENSG00000099194	ENSG00000099194:1	SCD	0.9997	Adipose_Subcutaneous
ENSG00000196072	ENSG00000196072:3	BLOC1S2	0.9991	Adipose_Subcutaneous
ENSG00000213445	ENSG00000213445:1	SIPA1	0.9981	Nerve_Tibial
ENSG00000213949	ENSG00000213949:1	ITGA1	0.998	Esophagus_Gastroesophageal_Junction
ENSG00000213949	ENSG00000213949:1	ITGA1	0.9976	Colon_Transverse
ENSG00000189067	ENSG00000189067:1	LITAF	0.9974	Skin_Sun_Exposed
ENSG00000213949	ENSG00000213949:1	ITGA1	0.9957	Esophagus_Muscularis
ENSG00000138639	ENSG00000138639:1	ARHGAP24	0.9952	Artery_Tibial
ENSG00000099194	ENSG00000099194:1	SCD	0.9937	Adipose_Visceral_Omentum
ENSG00000116062	ENSG00000116062:1	MSH6	0.991	Lung
ENSG00000108654	ENSG00000108654:1	DDX5	0.989	Adipose_Subcutaneous
ENSG00000183520	ENSG00000183520:1	UTP11	0.9883	Artery_Tibial
ENSG00000171873	ENSG00000171873:1	ADRA1D	0.9874	Brain_Cortex
ENSG00000135835	ENSG00000135835:1	KIAA1614	0.9852	Artery_Tibial
ENSG00000213949	ENSG00000213949:1	ITGA1	0.9843	Spleen
ENSG00000135835	ENSG00000135835:1	KIAA1614	0.9834	Lung
ENSG00000135835	ENSG00000135835:1	KIAA1614	0.9823	Artery_Aorta
ENSG00000258890	ENSG00000258890:1	CEP95	0.9818	Artery_Tibial
ENSG00000108654	ENSG00000108654:1	DDX5	0.9817	Artery_Tibial
ENSG00000258890	ENSG00000258890:1	CEP95	0.9814	Artery_Aorta
ENSG00000108654	ENSG00000108654:1	DDX5	0.981	Breast_Mammary_Tissue
ENSG00000258890	ENSG00000258890:1	CEP95	0.981	Adipose_Subcutaneous
ENSG00000135835	ENSG00000135835:1	KIAA1614	0.9807	Cells_Cultured_fibroblasts
ENSG00000108654	ENSG00000108654:1	DDX5	0.9803	Whole_Blood
ENSG00000135835	ENSG00000135835:1	KIAA1614	0.9803	Esophagus_Muscularis
ENSG00000258890	ENSG00000258890:1	CEP95	0.98	Spleen
ENSG00000258890	ENSG00000258890:1	CEP95	0.9794	Whole_Blood
ENSG00000108654	ENSG00000108654:1	DDX5	0.9792	Artery_Aorta
ENSG00000135835	ENSG00000135835:1	KIAA1614	0.9785	Brain_Cortex
ENSG00000258890	ENSG00000258890:1	CEP95	0.9781	Skin_Not_Sun_Exposed
ENSG00000011028	ENSG00000011028:1	MRC2	0.978	Adrenal_Gland
ENSG00000183386	ENSG00000183386:1	FHL3	0.978	Cells_Cultured_fibroblasts
ENSG00000258890	ENSG00000258890:2	CEP95	0.9778	Esophagus_Muscularis
ENSG00000108654	ENSG00000108654:1	DDX5	0.9777	Spleen
ENSG00000258890	ENSG00000258890:1	CEP95	0.9776	Nerve_Tibial
ENSG00000108654	ENSG00000108654:1	DDX5	0.9774	Cells_Cultured_fibroblasts
ENSG00000011028	ENSG00000011028:1	MRC2	0.9767	Lung
ENSG00000108654	ENSG00000108654:1	DDX5	0.9767	Skin_Not_Sun_Exposed
ENSG00000108654	ENSG00000108654:1	DDX5	0.9757	Esophagus_Muscularis
ENSG00000258890	ENSG00000258890:1	CEP95	0.9755	Lung
ENSG00000258890	ENSG00000258890:1	CEP95	0.9754	Stomach
ENSG00000108654	ENSG00000108654:1	DDX5	0.9751	Nerve_Tibial
ENSG00000108654	ENSG00000108654:1	DDX5	0.975	Skin_Sun_Exposed
ENSG00000108654	ENSG00000108654:1	DDX5	0.975	Lung
ENSG00000011028	ENSG00000011028:1	MRC2	0.9746	Cells_Cultured_fibroblasts
ENSG00000258890	ENSG00000258890:1	CEP95	0.9736	Breast_Mammary_Tissue
ENSG00000108654	ENSG00000108654:1	DDX5	0.9731	Colon_Transverse
ENSG00000258890	ENSG00000258890:1	CEP95	0.973	Thyroid
ENSG00000108654	ENSG00000108654:1	DDX5	0.9727	Thyroid
ENSG00000116062	ENSG00000116062:3	MSH6	0.9713	Cells_Cultured_fibroblasts
ENSG00000258890	ENSG00000258890:1	CEP95	0.9709	Pancreas
ENSG00000258890	ENSG00000258890:1	CEP95	0.9709	Pituitary
ENSG00000108654	ENSG00000108654:1	DDX5	0.9704	Brain_Hippocampus
ENSG00000164512	ENSG00000164512:1	ANKRD55	0.9701	Spleen
ENSG00000171914	ENSG00000171914:1	TLN2	0.9697	Nerve_Tibial
ENSG00000171914	ENSG00000171914:1	TLN2	0.9697	Esophagus_Muscularis
ENSG00000166225	ENSG00000166225:1	FRS2	0.9686	Thyroid
ENSG00000108654	ENSG00000108654:1	DDX5	0.968	Esophagus_Mucosa
ENSG00000204644	ENSG00000204644:2	ZFP57	0.9678	Adipose_Visceral_Omentum
ENSG00000180875	ENSG00000180875:1	GREM2	0.9671	Artery_Tibial
ENSG00000108654	ENSG00000108654:1	DDX5	0.967	Heart_Left_Ventricle
ENSG00000204644	ENSG00000204644:1	ZFP57	0.9668	Spleen
ENSG00000183386	ENSG00000183386:1	FHL3	0.9659	Stomach
ENSG00000258890	ENSG00000258890:1	CEP95	0.9658	Small_Intestine_Terminal_Ileum
ENSG00000204644	ENSG00000204644:1	ZFP57	0.9652	Lung
ENSG00000204644	ENSG00000204644:2	ZFP57	0.9649	Adipose_Subcutaneous
ENSG00000204644	ENSG00000204644:2	ZFP57	0.9645	Adrenal_Gland
ENSG00000258890	ENSG00000258890:2	CEP95	0.9626	Skin_Sun_Exposed
ENSG00000159650	ENSG00000159650:1	UROC1	0.9625	Minor_Salivary_Gland
ENSG00000204644	ENSG00000204644:2	ZFP57	0.9623	Skin_Not_Sun_Exposed
ENSG00000171914	ENSG00000171914:1	TLN2	0.9619	Esophagus_Gastroesophageal_Junction
ENSG00000204644	ENSG00000204644:1	ZFP57	0.9607	Small_Intestine_Terminal_Ileum
ENSG00000011028	ENSG00000011028:1	MRC2	0.9605	Thyroid
ENSG00000108654	ENSG00000108654:1	DDX5	0.9601	Esophagus_Gastroesophageal_Junction
ENSG00000116062	ENSG00000116062:1	MSH6	0.9597	Adipose_Visceral_Omentum
ENSG00000204644	ENSG00000204644:1	ZFP57	0.9595	Whole_Blood
ENSG00000116062	ENSG00000116062:1	MSH6	0.9593	Artery_Tibial
ENSG00000159650	ENSG00000159650:1	UROC1	0.959	Brain_Spinal_cord_cervical_c-1
ENSG00000108654	ENSG00000108654:1	DDX5	0.9585	Testis
ENSG00000258890	ENSG00000258890:1	CEP95	0.9582	Testis
ENSG00000135835	ENSG00000135835:1	KIAA1614	0.9577	Heart_Atrial_Appendage
ENSG00000108654	ENSG00000108654:1	DDX5	0.9573	Heart_Atrial_Appendage
ENSG00000204644	ENSG00000204644:1	ZFP57	0.9551	Cells_EBV-transformed_lymphocytes
ENSG00000183386	ENSG00000183386:1	FHL3	0.9542	Artery_Tibial
ENSG00000183386	ENSG00000183386:1	FHL3	0.9542	Spleen
ENSG00000169228	ENSG00000169228:1	RAB24	0.9539	Pituitary
ENSG00000187961	ENSG00000187961:1	KLHL17	0.9538	Breast_Mammary_Tissue
ENSG00000108654	ENSG00000108654:1	DDX5	0.9535	Small_Intestine_Terminal_Ileum
ENSG00000135835	ENSG00000135835:1	KIAA1614	0.9526	Adipose_Subcutaneous
ENSG00000183520	ENSG00000183520:1	UTP11	0.9524	Adrenal_Gland
ENSG00000138639	ENSG00000138639:1	ARHGAP24	0.9516	Artery_Aorta
ENSG00000204644	ENSG00000204644:2	ZFP57	0.9513	Stomach
ENSG00000183520	ENSG00000183520:1	UTP11	0.951	Artery_Aorta
ENSG00000183386	ENSG00000183386:1	FHL3	0.9506	Artery_Aorta
ENSG00000277791	ENSG00000277791:1	PSMB3	0.95	Artery_Tibial
ENSG00000183386	ENSG00000183386:1	FHL3	0.9481	Lung
ENSG00000183386	ENSG00000183386:1	FHL3	0.9477	Adrenal_Gland
ENSG00000011028	ENSG00000011028:1	MRC2	0.9471	Artery_Aorta
ENSG00000115306	ENSG00000115306:2	SPTBN1	0.9469	Cells_Cultured_fibroblasts
ENSG00000183386	ENSG00000183386:1	FHL3	0.9467	Pituitary
ENSG00000183386	ENSG00000183386:1	FHL3	0.9465	Esophagus_Gastroesophageal_Junction
ENSG00000159650	ENSG00000159650:1	UROC1	0.9464	Brain_Caudate_basal_ganglia
ENSG00000099785	ENSG00000099785:1	MARCHF2	0.946	Cells_Cultured_fibroblasts
ENSG00000183520	ENSG00000183520:1	UTP11	0.9457	Pancreas
ENSG00000277791	ENSG00000277791:1	PSMB3	0.9457	Breast_Mammary_Tissue
ENSG00000183386	ENSG00000183386:1	FHL3	0.9455	Pancreas
ENSG00000204644	ENSG00000204644:2	ZFP57	0.9452	Esophagus_Mucosa
ENSG00000258890	ENSG00000258890:1	CEP95	0.9448	Esophagus_Gastroesophageal_Junction
ENSG00000181264	ENSG00000181264:2	TLCD5	0.9435	Nerve_Tibial
ENSG00000187961	ENSG00000187961:1	KLHL17	0.9433	Whole_Blood
ENSG00000183386	ENSG00000183386:1	FHL3	0.943	Skin_Not_Sun_Exposed
ENSG00000169228	ENSG00000169228:2	RAB24	0.9424	Adipose_Subcutaneous
ENSG00000183386	ENSG00000183386:1	FHL3	0.9421	Nerve_Tibial
ENSG00000187961	ENSG00000187961:1	KLHL17	0.9417	Cells_Cultured_fibroblasts
ENSG00000183386	ENSG00000183386:1	FHL3	0.9409	Skin_Sun_Exposed
ENSG00000276293	ENSG00000276293:1	PIP4K2B	0.9406	Artery_Tibial
ENSG00000183386	ENSG00000183386:1	FHL3	0.939	Adipose_Subcutaneous
ENSG00000277791	ENSG00000277791:2	PSMB3	0.939	Esophagus_Mucosa
ENSG00000181264	ENSG00000181264:1	TLCD5	0.9383	Lung
ENSG00000169228	ENSG00000169228:1	RAB24	0.938	Breast_Mammary_Tissue
ENSG00000277791	ENSG00000277791:1	PSMB3	0.9378	Stomach
ENSG00000204644	ENSG00000204644:2	ZFP57	0.9375	Nerve_Tibial
ENSG00000169228	ENSG00000169228:1	RAB24	0.9373	Artery_Tibial
ENSG00000276293	ENSG00000276293:1	PIP4K2B	0.9371	Artery_Aorta
ENSG00000092969	ENSG00000092969:1	TGFB2	0.937	Colon_Sigmoid
ENSG00000187961	ENSG00000187961:1	KLHL17	0.937	Artery_Aorta
ENSG00000277791	ENSG00000277791:1	PSMB3	0.937	Liver
ENSG00000181264	ENSG00000181264:2	TLCD5	0.9368	Artery_Tibial
ENSG00000277791	ENSG00000277791:1	PSMB3	0.9362	Nerve_Tibial
ENSG00000277791	ENSG00000277791:1	PSMB3	0.9359	Artery_Aorta
ENSG00000277791	ENSG00000277791:1	PSMB3	0.9358	Esophagus_Muscularis
ENSG00000169228	ENSG00000169228:1	RAB24	0.9355	Adipose_Visceral_Omentum
ENSG00000277791	ENSG00000277791:1	PSMB3	0.9355	Cells_Cultured_fibroblasts
ENSG00000277791	ENSG00000277791:1	PSMB3	0.9353	Whole_Blood
ENSG00000276293	ENSG00000276293:1	PIP4K2B	0.9351	Cells_Cultured_fibroblasts
ENSG00000181264	ENSG00000181264:1	TLCD5	0.9346	Esophagus_Muscularis
ENSG00000277791	ENSG00000277791:1	PSMB3	0.9346	Colon_Transverse
ENSG00000135835	ENSG00000135835:1	KIAA1614	0.9345	Brain_Frontal_Cortex_BA9
ENSG00000169228	ENSG00000169228:1	RAB24	0.934	Artery_Aorta
ENSG00000183386	ENSG00000183386:1	FHL3	0.9339	Esophagus_Mucosa
ENSG00000166949	ENSG00000166949:2	SMAD3	0.9336	Thyroid
ENSG00000277791	ENSG00000277791:1	PSMB3	0.9333	Adipose_Visceral_Omentum
ENSG00000169228	ENSG00000169228:1	RAB24	0.9328	Cells_Cultured_fibroblasts
ENSG00000183386	ENSG00000183386:1	FHL3	0.9326	Heart_Atrial_Appendage
ENSG00000277791	ENSG00000277791:1	PSMB3	0.9323	Lung
ENSG00000108654	ENSG00000108654:1	DDX5	0.9321	Brain_Frontal_Cortex_BA9
ENSG00000183386	ENSG00000183386:1	FHL3	0.9309	Thyroid
ENSG00000183386	ENSG00000183386:1	FHL3	0.9309	Breast_Mammary_Tissue
ENSG00000169228	ENSG00000169228:1	RAB24	0.9308	Adrenal_Gland
ENSG00000183386	ENSG00000183386:1	FHL3	0.9305	Heart_Left_Ventricle
ENSG00000181264	ENSG00000181264:1	TLCD5	0.9295	Muscle_Skeletal
ENSG00000277791	ENSG00000277791:1	PSMB3	0.9294	Adipose_Subcutaneous
ENSG00000277791	ENSG00000277791:1	PSMB3	0.9284	Artery_Coronary
ENSG00000169228	ENSG00000169228:1	RAB24	0.9283	Muscle_Skeletal
ENSG00000277791	ENSG00000277791:2	PSMB3	0.9282	Skin_Not_Sun_Exposed
ENSG00000169228	ENSG00000169228:1	RAB24	0.9278	Stomach
ENSG00000099785	ENSG00000099785:1	MARCHF2	0.9276	Colon_Transverse
ENSG00000183386	ENSG00000183386:1	FHL3	0.9274	Adipose_Visceral_Omentum
ENSG00000169228	ENSG00000169228:1	RAB24	0.9272	Esophagus_Gastroesophageal_Junction
ENSG00000276293	ENSG00000276293:1	PIP4K2B	0.9271	Breast_Mammary_Tissue
ENSG00000204644	ENSG00000204644:2	ZFP57	0.927	Colon_Transverse
ENSG00000187961	ENSG00000187961:1	KLHL17	0.9261	Artery_Tibial
ENSG00000169228	ENSG00000169228:1	RAB24	0.9255	Artery_Coronary
ENSG00000169228	ENSG00000169228:1	RAB24	0.9252	Brain_Nucleus_accumbens_basal_ganglia
ENSG00000204520	ENSG00000204520:4	MICA	0.9251	Whole_Blood
ENSG00000181264	ENSG00000181264:1	TLCD5	0.9242	Esophagus_Gastroesophageal_Junction
ENSG00000139044	ENSG00000139044:1	B4GALNT3	0.9241	Artery_Aorta
ENSG00000169228	ENSG00000169228:1	RAB24	0.9235	Esophagus_Muscularis
ENSG00000181264	ENSG00000181264:1	TLCD5	0.9235	Heart_Left_Ventricle
ENSG00000169228	ENSG00000169228:1	RAB24	0.9234	Nerve_Tibial
ENSG00000169228	ENSG00000169228:2	RAB24	0.9219	Small_Intestine_Terminal_Ileum
ENSG00000187961	ENSG00000187961:1	KLHL17	0.9218	Esophagus_Mucosa
ENSG00000169228	ENSG00000169228:3	RAB24	0.9215	Colon_Sigmoid
ENSG00000080493	ENSG00000080493:1	SLC4A4	0.9211	Cells_Cultured_fibroblasts
ENSG00000183386	ENSG00000183386:1	FHL3	0.9193	Small_Intestine_Terminal_Ileum
ENSG00000169228	ENSG00000169228:1	RAB24	0.9185	Skin_Sun_Exposed
ENSG00000181264	ENSG00000181264:1	TLCD5	0.9185	Prostate
ENSG00000011028	ENSG00000011028:1	MRC2	0.9184	Prostate
ENSG00000169228	ENSG00000169228:1	RAB24	0.9178	Ovary
ENSG00000258890	ENSG00000258890:1	CEP95	0.9175	Prostate
ENSG00000169228	ENSG00000169228:1	RAB24	0.9171	Colon_Transverse
ENSG00000258890	ENSG00000258890:1	CEP95	0.9168	Brain_Cortex
ENSG00000108654	ENSG00000108654:1	DDX5	0.9157	Brain_Putamen_basal_ganglia
ENSG00000164889	ENSG00000164889:1	SLC4A2	0.9152	Brain_Cerebellar_Hemisphere
ENSG00000185340	ENSG00000185340:1	GAS2L1	0.915	Cells_Cultured_fibroblasts
ENSG00000134222	ENSG00000134222:1	PSRC1	0.914	Pancreas
ENSG00000169228	ENSG00000169228:1	RAB24	0.913	Brain_Putamen_basal_ganglia
ENSG00000169228	ENSG00000169228:1	RAB24	0.9114	Skin_Not_Sun_Exposed
ENSG00000099785	ENSG00000099785:1	MARCHF2	0.9105	Whole_Blood
ENSG00000277791	ENSG00000277791:1	PSMB3	0.9086	Adrenal_Gland
ENSG00000277791	ENSG00000277791:1	PSMB3	0.9081	Thyroid
ENSG00000139044	ENSG00000139044:1	B4GALNT3	0.9077	Artery_Tibial
ENSG00000183386	ENSG00000183386:1	FHL3	0.9072	Esophagus_Muscularis
ENSG00000169228	ENSG00000169228:1	RAB24	0.9071	Brain_Cerebellar_Hemisphere
ENSG00000181264	ENSG00000181264:1	TLCD5	0.9059	Colon_Transverse
ENSG00000169228	ENSG00000169228:1	RAB24	0.9055	Thyroid
ENSG00000109472	ENSG00000109472:1	CPE	0.9052	Liver
ENSG00000169228	ENSG00000169228:1	RAB24	0.9049	Heart_Atrial_Appendage
ENSG00000072786	ENSG00000072786:1	STK10	0.9029	Lung
ENSG00000169228	ENSG00000169228:2	RAB24	0.9029	Brain_Caudate_basal_ganglia
ENSG00000204520	ENSG00000204520:4	MICA	0.9017	Skin_Not_Sun_Exposed
ENSG00000258890	ENSG00000258890:1	CEP95	0.9014	Adipose_Visceral_Omentum
ENSG00000165487	ENSG00000165487:1	MICU2	0.9011	Thyroid
ENSG00000184640	ENSG00000184640:1	SEPTIN9	0.8952	Muscle_Skeletal
ENSG00000187583	ENSG00000187583:1	PLEKHN1	0.893	Cells_Cultured_fibroblasts
ENSG00000213347	ENSG00000213347:3	MXD3	0.8913	Heart_Atrial_Appendage
ENSG00000277791	ENSG00000277791:1	PSMB3	0.8894	Prostate
ENSG00000187583	ENSG00000187583:1	PLEKHN1	0.8887	Artery_Tibial
ENSG00000139044	ENSG00000139044:1	B4GALNT3	0.8869	Ovary
ENSG00000160256	ENSG00000160256:3	FAM207A	0.8865	Colon_Transverse
ENSG00000165487	ENSG00000165487:1	MICU2	0.8865	Lung
ENSG00000108654	ENSG00000108654:1	DDX5	0.8852	Stomach
ENSG00000187583	ENSG00000187583:1	PLEKHN1	0.884	Adrenal_Gland
ENSG00000204644	ENSG00000204644:1	ZFP57	0.884	Vagina
ENSG00000054965	ENSG00000054965:1	FAM168A	0.8838	Artery_Tibial
ENSG00000143126	ENSG00000143126:1	CELSR2	0.8834	Muscle_Skeletal
ENSG00000054965	ENSG00000054965:2	FAM168A	0.883	Nerve_Tibial
ENSG00000277791	ENSG00000277791:1	PSMB3	0.8808	Spleen
ENSG00000148498	ENSG00000148498:2	PARD3	0.8797	Cells_Cultured_fibroblasts
ENSG00000136944	ENSG00000136944:1	LMX1B	0.8794	Adipose_Subcutaneous
ENSG00000143126	ENSG00000143126:1	CELSR2	0.8787	Liver
ENSG00000204644	ENSG00000204644:2	ZFP57	0.8781	Breast_Mammary_Tissue
ENSG00000147437	ENSG00000147437:1	GNRH1	0.8771	Whole_Blood
ENSG00000152284	ENSG00000152284:1	TCF7L1	0.8764	Artery_Aorta
ENSG00000277791	ENSG00000277791:4	PSMB3	0.8758	Small_Intestine_Terminal_Ileum
ENSG00000113658	ENSG00000113658:1	SMAD5	0.8747	Esophagus_Muscularis
ENSG00000105173	ENSG00000105173:1	CCNE1	0.8746	Thyroid
ENSG00000213347	ENSG00000213347:3	MXD3	0.874	Muscle_Skeletal
ENSG00000113319	ENSG00000113319:1	RASGRF2	0.8716	Thyroid
ENSG00000139044	ENSG00000139044:1	B4GALNT3	0.8715	Artery_Coronary
ENSG00000197586	ENSG00000197586:1	ENTPD6	0.8708	Artery_Aorta
ENSG00000277791	ENSG00000277791:1	PSMB3	0.8695	Testis
ENSG00000183762	ENSG00000183762:1	KREMEN1	0.8686	Heart_Left_Ventricle
ENSG00000138678	ENSG00000138678:1	GPAT3	0.8681	Cells_Cultured_fibroblasts
ENSG00000187961	ENSG00000187961:1	KLHL17	0.8681	Adipose_Visceral_Omentum
ENSG00000197586	ENSG00000197586:1	ENTPD6	0.868	Whole_Blood
ENSG00000066468	ENSG00000066468:1	FGFR2	0.8667	Colon_Sigmoid
ENSG00000189067	ENSG00000189067:2	LITAF	0.8652	Colon_Sigmoid
ENSG00000066248	ENSG00000066248:1	NGEF	0.8651	Artery_Aorta
ENSG00000213949	ENSG00000213949:1	ITGA1	0.8637	Nerve_Tibial
ENSG00000135835	ENSG00000135835:1	KIAA1614	0.8633	Skin_Sun_Exposed
ENSG00000179195	ENSG00000179195:1	ZNF664	0.8626	Adipose_Visceral_Omentum
ENSG00000197586	ENSG00000197586:1	ENTPD6	0.8626	Lung
ENSG00000108654	ENSG00000108654:1	DDX5	0.8614	Brain_Cerebellar_Hemisphere
ENSG00000188897	ENSG00000188897:1	AC099489.1	0.8612	Adipose_Subcutaneous
ENSG00000183386	ENSG00000183386:1	FHL3	0.8599	Ovary
ENSG00000099785	ENSG00000099785:1	MARCHF2	0.8595	Artery_Tibial
ENSG00000187961	ENSG00000187961:1	KLHL17	0.8587	Brain_Cerebellar_Hemisphere
ENSG00000197586	ENSG00000197586:1	ENTPD6	0.8587	Esophagus_Gastroesophageal_Junction
ENSG00000183520	ENSG00000183520:1	UTP11	0.8583	Adipose_Subcutaneous
ENSG00000183520	ENSG00000183520:1	UTP11	0.8579	Artery_Coronary
ENSG00000169228	ENSG00000169228:2	RAB24	0.8578	Whole_Blood
ENSG00000105173	ENSG00000105173:1	CCNE1	0.8577	Adipose_Subcutaneous
ENSG00000099785	ENSG00000099785:1	MARCHF2	0.8563	Adrenal_Gland
ENSG00000105173	ENSG00000105173:1	CCNE1	0.8546	Adrenal_Gland
ENSG00000183431	ENSG00000183431:1	SF3A3	0.8546	Brain_Putamen_basal_ganglia
ENSG00000197586	ENSG00000197586:1	ENTPD6	0.8542	Breast_Mammary_Tissue
ENSG00000099785	ENSG00000099785:1	MARCHF2	0.8541	Stomach
ENSG00000197586	ENSG00000197586:2	ENTPD6	0.8534	Artery_Tibial
ENSG00000178665	ENSG00000178665:2	ZNF713	0.8526	Esophagus_Gastroesophageal_Junction
ENSG00000276293	ENSG00000276293:1	PIP4K2B	0.8525	Brain_Frontal_Cortex_BA9
ENSG00000136944	ENSG00000136944:2	LMX1B	0.8523	Nerve_Tibial
ENSG00000099785	ENSG00000099785:1	MARCHF2	0.852	Artery_Aorta
ENSG00000099785	ENSG00000099785:1	MARCHF2	0.8514	Adipose_Visceral_Omentum
ENSG00000099785	ENSG00000099785:1	MARCHF2	0.8507	Adipose_Subcutaneous
ENSG00000197586	ENSG00000197586:1	ENTPD6	0.849	Nerve_Tibial
ENSG00000099785	ENSG00000099785:1	MARCHF2	0.8489	Esophagus_Gastroesophageal_Junction
ENSG00000105173	ENSG00000105173:1	CCNE1	0.8488	Artery_Aorta
ENSG00000137869	ENSG00000137869:1	CYP19A1	0.8468	Skin_Sun_Exposed
ENSG00000105173	ENSG00000105173:1	CCNE1	0.8464	Pancreas
ENSG00000143126	ENSG00000143126:1	CELSR2	0.8463	Pancreas
ENSG00000119242	ENSG00000119242:2	CCDC92	0.8461	Breast_Mammary_Tissue
ENSG00000169228	ENSG00000169228:1	RAB24	0.8457	Brain_Spinal_cord_cervical_c-1
ENSG00000187961	ENSG00000187961:1	KLHL17	0.8456	Esophagus_Muscularis
ENSG00000170876	ENSG00000170876:1	TMEM43	0.8449	Thyroid
ENSG00000178665	ENSG00000178665:1	ZNF713	0.8446	Skin_Sun_Exposed
ENSG00000099785	ENSG00000099785:1	MARCHF2	0.8436	Lung
ENSG00000178665	ENSG00000178665:1	ZNF713	0.8432	Stomach
ENSG00000099785	ENSG00000099785:1	MARCHF2	0.8431	Skin_Not_Sun_Exposed
ENSG00000125967	ENSG00000125967:1	NECAB3	0.842	Esophagus_Mucosa
ENSG00000099785	ENSG00000099785:1	MARCHF2	0.8415	Heart_Left_Ventricle
ENSG00000148498	ENSG00000148498:2	PARD3	0.8403	Muscle_Skeletal
ENSG00000169228	ENSG00000169228:1	RAB24	0.8398	Heart_Left_Ventricle
ENSG00000134222	ENSG00000134222:2	PSRC1	0.8382	Colon_Sigmoid
ENSG00000135956	ENSG00000135956:1	TMEM127	0.8381	Artery_Tibial
ENSG00000197586	ENSG00000197586:1	ENTPD6	0.8376	Stomach
ENSG00000099785	ENSG00000099785:1	MARCHF2	0.8375	Artery_Coronary
ENSG00000066248	ENSG00000066248:1	NGEF	0.8374	Artery_Tibial
ENSG00000151612	ENSG00000151612:1	ZNF827	0.8365	Cells_Cultured_fibroblasts
ENSG00000099785	ENSG00000099785:1	MARCHF2	0.8359	Minor_Salivary_Gland
ENSG00000108960	ENSG00000108960:1	MMD	0.8347	Brain_Hippocampus
ENSG00000179195	ENSG00000179195:1	ZNF664	0.8346	Adipose_Subcutaneous
ENSG00000135956	ENSG00000135956:1	TMEM127	0.8338	Whole_Blood
ENSG00000113658	ENSG00000113658:1	SMAD5	0.8336	Artery_Tibial
ENSG00000197586	ENSG00000197586:1	ENTPD6	0.8336	Adipose_Visceral_Omentum
ENSG00000183386	ENSG00000183386:2	FHL3	0.8333	Whole_Blood
ENSG00000134222	ENSG00000134222:1	PSRC1	0.8321	Muscle_Skeletal
ENSG00000052802	ENSG00000052802:1	MSMO1	0.8317	Brain_Caudate_basal_ganglia
ENSG00000197586	ENSG00000197586:1	ENTPD6	0.8305	Colon_Sigmoid
ENSG00000143801	ENSG00000143801:1	PSEN2	0.8304	Brain_Frontal_Cortex_BA9
ENSG00000144668	ENSG00000144668:2	ITGA9	0.83	Brain_Cerebellar_Hemisphere
ENSG00000108960	ENSG00000108960:1	MMD	0.8297	Brain_Cortex
ENSG00000178665	ENSG00000178665:1	ZNF713	0.8297	Lung
ENSG00000054965	ENSG00000054965:1	FAM168A	0.8291	Esophagus_Muscularis
ENSG00000134222	ENSG00000134222:1	PSRC1	0.8288	Esophagus_Mucosa
ENSG00000099785	ENSG00000099785:1	MARCHF2	0.8287	Brain_Hypothalamus
ENSG00000099785	ENSG00000099785:1	MARCHF2	0.8286	Muscle_Skeletal
ENSG00000099785	ENSG00000099785:1	MARCHF2	0.8279	Thyroid
ENSG00000178665	ENSG00000178665:1	ZNF713	0.8278	Esophagus_Mucosa
ENSG00000092607	ENSG00000092607:1	TBX15	0.8274	Lung
ENSG00000134222	ENSG00000134222:2	PSRC1	0.8271	Adipose_Subcutaneous
ENSG00000099785	ENSG00000099785:1	MARCHF2	0.827	Brain_Putamen_basal_ganglia
ENSG00000099785	ENSG00000099785:1	MARCHF2	0.8266	Nerve_Tibial
ENSG00000099785	ENSG00000099785:1	MARCHF2	0.8261	Brain_Spinal_cord_cervical_c-1
ENSG00000136944	ENSG00000136944:1	LMX1B	0.8237	Adipose_Visceral_Omentum
ENSG00000135956	ENSG00000135956:1	TMEM127	0.8236	Lung
ENSG00000099785	ENSG00000099785:1	MARCHF2	0.8228	Skin_Sun_Exposed
ENSG00000138678	ENSG00000138678:1	GPAT3	0.8212	Whole_Blood
ENSG00000277791	ENSG00000277791:1	PSMB3	0.8212	Ovary
ENSG00000099785	ENSG00000099785:1	MARCHF2	0.8208	Spleen
ENSG00000197586	ENSG00000197586:1	ENTPD6	0.8207	Thyroid
ENSG00000131055	ENSG00000131055:1	COX4I2	0.8196	Breast_Mammary_Tissue
ENSG00000066248	ENSG00000066248:1	NGEF	0.819	Esophagus_Mucosa
ENSG00000131055	ENSG00000131055:1	COX4I2	0.8184	Nerve_Tibial
ENSG00000134222	ENSG00000134222:2	PSRC1	0.8181	Stomach
ENSG00000138758	ENSG00000138758:1	SEPTIN11	0.8179	Pancreas
ENSG00000131055	ENSG00000131055:1	COX4I2	0.8174	Artery_Tibial
ENSG00000135956	ENSG00000135956:1	TMEM127	0.8145	Skin_Not_Sun_Exposed
ENSG00000066248	ENSG00000066248:1	NGEF	0.8136	Colon_Sigmoid
ENSG00000258890	ENSG00000258890:1	CEP95	0.8136	Brain_Frontal_Cortex_BA9
ENSG00000134222	ENSG00000134222:2	PSRC1	0.8132	Pituitary
ENSG00000135956	ENSG00000135956:1	TMEM127	0.8128	Adipose_Visceral_Omentum
ENSG00000066248	ENSG00000066248:1	NGEF	0.8124	Esophagus_Muscularis
ENSG00000099785	ENSG00000099785:1	MARCHF2	0.8119	Heart_Atrial_Appendage
ENSG00000134243	ENSG00000134243:1	SORT1	0.811	Liver
ENSG00000204644	ENSG00000204644:2	ZFP57	0.8109	Skin_Sun_Exposed
ENSG00000099785	ENSG00000099785:1	MARCHF2	0.8103	Esophagus_Mucosa
ENSG00000066248	ENSG00000066248:1	NGEF	0.8092	Heart_Left_Ventricle
ENSG00000134222	ENSG00000134222:1	PSRC1	0.8091	Skin_Sun_Exposed
ENSG00000181264	ENSG00000181264:2	TLCD5	0.809	Stomach
ENSG00000183520	ENSG00000183520:1	UTP11	0.8081	Breast_Mammary_Tissue
ENSG00000171132	ENSG00000171132:1	PRKCE	0.806	Whole_Blood
ENSG00000178665	ENSG00000178665:1	ZNF713	0.8059	Pituitary
ENSG00000134222	ENSG00000134222:1	PSRC1	0.8056	Liver
ENSG00000116774	ENSG00000116774:2	OLFML3	0.8048	Artery_Aorta
ENSG00000011105	ENSG00000011105:2	TSPAN9	0.8045	Nerve_Tibial
ENSG00000183011	ENSG00000183011:1	NAA38	0.8044	Artery_Tibial
ENSG00000185885	ENSG00000185885:1	IFITM1	0.8042	Liver
ENSG00000135956	ENSG00000135956:1	TMEM127	0.8036	Nerve_Tibial
ENSG00000099785	ENSG00000099785:1	MARCHF2	0.8025	Pancreas
ENSG00000099785	ENSG00000099785:1	MARCHF2	0.8023	Brain_Frontal_Cortex_BA9
ENSG00000183431	ENSG00000183431:2	SF3A3	0.8008	Esophagus_Mucosa
ENSG00000135835	ENSG00000135835:1	KIAA1614	0.7984	Breast_Mammary_Tissue
ENSG00000258890	ENSG00000258890:1	CEP95	0.7982	Brain_Nucleus_accumbens_basal_ganglia
ENSG00000144021	ENSG00000144021:2	CIAO1	0.7976	Muscle_Skeletal
ENSG00000131055	ENSG00000131055:1	COX4I2	0.7968	Muscle_Skeletal
ENSG00000143515	ENSG00000143515:1	ATP8B2	0.7957	Cells_Cultured_fibroblasts
ENSG00000066248	ENSG00000066248:1	NGEF	0.7956	Artery_Coronary
ENSG00000134222	ENSG00000134222:1	PSRC1	0.7952	Whole_Blood
ENSG00000100099	ENSG00000100099:1	HPS4	0.7951	Adipose_Visceral_Omentum
ENSG00000131055	ENSG00000131055:1	COX4I2	0.7949	Thyroid
ENSG00000131055	ENSG00000131055:1	COX4I2	0.7946	Esophagus_Muscularis
ENSG00000134222	ENSG00000134222:1	PSRC1	0.7946	Nerve_Tibial
ENSG00000134569	ENSG00000134569:1	LRP4	0.7943	Pancreas
ENSG00000276293	ENSG00000276293:2	PIP4K2B	0.7934	Skin_Sun_Exposed
ENSG00000134222	ENSG00000134222:2	PSRC1	0.793	Colon_Transverse
ENSG00000187961	ENSG00000187961:2	KLHL17	0.7914	Adrenal_Gland
ENSG00000100099	ENSG00000100099:1	HPS4	0.7911	Artery_Aorta
ENSG00000100099	ENSG00000100099:1	HPS4	0.7898	Artery_Tibial
ENSG00000166250	ENSG00000166250:1	CLMP	0.7898	Adipose_Visceral_Omentum
ENSG00000119878	ENSG00000119878:1	CRIPT	0.7897	Cells_EBV-transformed_lymphocytes
ENSG00000105173	ENSG00000105173:1	CCNE1	0.788	Colon_Transverse
ENSG00000100099	ENSG00000100099:1	HPS4	0.7873	Adipose_Subcutaneous
ENSG00000108654	ENSG00000108654:1	DDX5	0.7868	Liver
ENSG00000135956	ENSG00000135956:1	TMEM127	0.7861	Skin_Sun_Exposed
ENSG00000164512	ENSG00000164512:1	ANKRD55	0.7855	Whole_Blood
ENSG00000099785	ENSG00000099785:1	MARCHF2	0.7852	Breast_Mammary_Tissue
ENSG00000060138	ENSG00000060138:2	YBX3	0.785	Esophagus_Mucosa
ENSG00000187961	ENSG00000187961:1	KLHL17	0.785	Pancreas
ENSG00000134222	ENSG00000134222:2	PSRC1	0.7848	Prostate
ENSG00000135956	ENSG00000135956:1	TMEM127	0.7842	Cells_EBV-transformed_lymphocytes
ENSG00000099785	ENSG00000099785:1	MARCHF2	0.7839	Brain_Cerebellum
ENSG00000099785	ENSG00000099785:1	MARCHF2	0.7837	Brain_Caudate_basal_ganglia
ENSG00000181264	ENSG00000181264:1	TLCD5	0.7837	Testis
ENSG00000135956	ENSG00000135956:1	TMEM127	0.7835	Adipose_Subcutaneous
ENSG00000169228	ENSG00000169228:1	RAB24	0.7834	Brain_Cerebellum
ENSG00000100099	ENSG00000100099:1	HPS4	0.7822	Cells_Cultured_fibroblasts
ENSG00000166598	ENSG00000166598:1	HSP90B1	0.7821	Muscle_Skeletal
ENSG00000134222	ENSG00000134222:1	PSRC1	0.7813	Brain_Putamen_basal_ganglia
ENSG00000204644	ENSG00000204644:2	ZFP57	0.7811	Thyroid
ENSG00000183011	ENSG00000183011:1	NAA38	0.781	Adipose_Subcutaneous
ENSG00000100099	ENSG00000100099:1	HPS4	0.78	Lung
ENSG00000125089	ENSG00000125089:1	SH3TC1	0.7791	Colon_Transverse
ENSG00000183011	ENSG00000183011:1	NAA38	0.7791	Artery_Aorta
ENSG00000143126	ENSG00000143126:1	CELSR2	0.777	Minor_Salivary_Gland
ENSG00000135956	ENSG00000135956:1	TMEM127	0.7768	Artery_Aorta
ENSG00000134222	ENSG00000134222:2	PSRC1	0.7766	Esophagus_Gastroesophageal_Junction
ENSG00000169228	ENSG00000169228:1	RAB24	0.7766	Lung
ENSG00000131668	ENSG00000131668:1	BARX1	0.7764	Colon_Transverse
ENSG00000066248	ENSG00000066248:1	NGEF	0.7756	Spleen
ENSG00000187961	ENSG00000187961:1	KLHL17	0.7756	Heart_Atrial_Appendage
ENSG00000187961	ENSG00000187961:1	KLHL17	0.7755	Colon_Transverse
ENSG00000183011	ENSG00000183011:1	NAA38	0.7754	Esophagus_Gastroesophageal_Junction
ENSG00000066248	ENSG00000066248:1	NGEF	0.7742	Cells_Cultured_fibroblasts
ENSG00000187961	ENSG00000187961:1	KLHL17	0.7729	Colon_Sigmoid
ENSG00000052802	ENSG00000052802:1	MSMO1	0.7726	Brain_Putamen_basal_ganglia
ENSG00000135956	ENSG00000135956:1	TMEM127	0.7726	Stomach
ENSG00000119242	ENSG00000119242:2	CCDC92	0.7723	Adipose_Visceral_Omentum
ENSG00000134222	ENSG00000134222:2	PSRC1	0.7723	Brain_Frontal_Cortex_BA9
ENSG00000022567	ENSG00000022567:1	SLC45A4	0.7718	Adrenal_Gland
ENSG00000166598	ENSG00000166598:1	HSP90B1	0.7718	Cells_Cultured_fibroblasts
ENSG00000204520	ENSG00000204520:4	MICA	0.7715	Nerve_Tibial
ENSG00000118004	ENSG00000118004:1	COLEC11	0.7709	Liver
ENSG00000146648	ENSG00000146648:1	EGFR	0.7709	Heart_Atrial_Appendage
ENSG00000178665	ENSG00000178665:2	ZNF713	0.7706	Prostate
ENSG00000066248	ENSG00000066248:1	NGEF	0.7702	Adipose_Subcutaneous
ENSG00000183520	ENSG00000183520:1	UTP11	0.7702	Uterus
ENSG00000138639	ENSG00000138639:1	ARHGAP24	0.7688	Artery_Coronary
ENSG00000179008	ENSG00000179008:2	C14orf39	0.7682	Muscle_Skeletal
ENSG00000131242	ENSG00000131242:1	RAB11FIP4	0.7681	Thyroid
ENSG00000178665	ENSG00000178665:3	ZNF713	0.7673	Skin_Not_Sun_Exposed
ENSG00000134369	ENSG00000134369:1	NAV1	0.7671	Brain_Cerebellum
ENSG00000187961	ENSG00000187961:1	KLHL17	0.7668	Testis
ENSG00000178665	ENSG00000178665:1	ZNF713	0.7663	Brain_Amygdala
ENSG00000135956	ENSG00000135956:1	TMEM127	0.766	Esophagus_Muscularis
ENSG00000183011	ENSG00000183011:1	NAA38	0.7654	Nerve_Tibial
ENSG00000134222	ENSG00000134222:1	PSRC1	0.765	Brain_Cortex
ENSG00000120156	ENSG00000120156:2	TEK	0.7639	Artery_Tibial
ENSG00000100099	ENSG00000100099:1	HPS4	0.763	Colon_Transverse
ENSG00000134222	ENSG00000134222:1	PSRC1	0.7625	Cells_Cultured_fibroblasts
ENSG00000187961	ENSG00000187961:1	KLHL17	0.7619	Prostate
ENSG00000104852	ENSG00000104852:1	SNRNP70	0.7616	Brain_Nucleus_accumbens_basal_ganglia
ENSG00000100099	ENSG00000100099:1	HPS4	0.7615	Esophagus_Muscularis
ENSG00000108960	ENSG00000108960:1	MMD	0.7602	Brain_Anterior_cingulate_cortex_BA24
ENSG00000167637	ENSG00000167637:1	ZNF283	0.7599	Thyroid
ENSG00000160256	ENSG00000160256:2	FAM207A	0.7592	Esophagus_Muscularis
ENSG00000183011	ENSG00000183011:1	NAA38	0.7571	Cells_EBV-transformed_lymphocytes
ENSG00000144824	ENSG00000144824:1	PHLDB2	0.7566	Spleen
ENSG00000166598	ENSG00000166598:1	HSP90B1	0.7555	Esophagus_Mucosa
ENSG00000178665	ENSG00000178665:2	ZNF713	0.7553	Whole_Blood
ENSG00000188897	ENSG00000188897:2	AC099489.1	0.7537	Whole_Blood
ENSG00000142961	ENSG00000142961:1	MOB3C	0.7529	Whole_Blood
ENSG00000131055	ENSG00000131055:1	COX4I2	0.7528	Artery_Aorta
ENSG00000125967	ENSG00000125967:1	NECAB3	0.7521	Artery_Aorta
ENSG00000066248	ENSG00000066248:1	NGEF	0.7517	Esophagus_Gastroesophageal_Junction
ENSG00000099785	ENSG00000099785:1	MARCHF2	0.7517	Ovary
ENSG00000131055	ENSG00000131055:1	COX4I2	0.7513	Skin_Not_Sun_Exposed
ENSG00000144021	ENSG00000144021:2	CIAO1	0.7503	Esophagus_Muscularis
ENSG00000082497	ENSG00000082497:2	SERTAD4	0.7495	Thyroid
ENSG00000183011	ENSG00000183011:1	NAA38	0.7489	Thyroid
ENSG00000181827	ENSG00000181827:1	RFX7	0.7471	Pituitary
ENSG00000131055	ENSG00000131055:1	COX4I2	0.746	Heart_Left_Ventricle
ENSG00000099785	ENSG00000099785:1	MARCHF2	0.745	Brain_Nucleus_accumbens_basal_ganglia
ENSG00000134222	ENSG00000134222:1	PSRC1	0.7441	Esophagus_Muscularis
ENSG00000099785	ENSG00000099785:1	MARCHF2	0.7439	Testis
ENSG00000179195	ENSG00000179195:1	ZNF664	0.7438	Breast_Mammary_Tissue
ENSG00000100104	ENSG00000100104:1	SRRD	0.7433	Skin_Sun_Exposed
ENSG00000179833	ENSG00000179833:1	SERTAD2	0.7424	Muscle_Skeletal
ENSG00000134222	ENSG00000134222:2	PSRC1	0.7423	Breast_Mammary_Tissue
ENSG00000187961	ENSG00000187961:1	KLHL17	0.7406	Lung
ENSG00000135956	ENSG00000135956:1	TMEM127	0.7397	Esophagus_Mucosa
ENSG00000135956	ENSG00000135956:1	TMEM127	0.7387	Pituitary
ENSG00000197586	ENSG00000197586:1	ENTPD6	0.7379	Colon_Transverse
ENSG00000109193	ENSG00000109193:1	SULT1E1	0.7368	Lung
ENSG00000054965	ENSG00000054965:1	FAM168A	0.7361	Skin_Sun_Exposed
ENSG00000135956	ENSG00000135956:1	TMEM127	0.736	Brain_Caudate_basal_ganglia
ENSG00000183520	ENSG00000183520:1	UTP11	0.7359	Thyroid
ENSG00000183520	ENSG00000183520:1	UTP11	0.7353	Heart_Atrial_Appendage
ENSG00000183011	ENSG00000183011:1	NAA38	0.7352	Small_Intestine_Terminal_Ileum
ENSG00000131055	ENSG00000131055:1	COX4I2	0.7336	Colon_Sigmoid
ENSG00000187961	ENSG00000187961:1	KLHL17	0.7327	Spleen
ENSG00000183011	ENSG00000183011:1	NAA38	0.7324	Breast_Mammary_Tissue
ENSG00000170234	ENSG00000170234:1	PWWP2A	0.732	Nerve_Tibial
ENSG00000187583	ENSG00000187583:1	PLEKHN1	0.7314	Stomach
ENSG00000119878	ENSG00000119878:1	CRIPT	0.7312	Skin_Not_Sun_Exposed
ENSG00000180806	ENSG00000180806:1	HOXC9	0.7312	Nerve_Tibial
ENSG00000166598	ENSG00000166598:1	HSP90B1	0.731	Skin_Sun_Exposed
ENSG00000099785	ENSG00000099785:1	MARCHF2	0.7305	Brain_Hippocampus
ENSG00000132510	ENSG00000132510:1	KDM6B	0.7287	Artery_Tibial
ENSG00000100099	ENSG00000100099:1	HPS4	0.7286	Thyroid
ENSG00000100099	ENSG00000100099:1	HPS4	0.7279	Esophagus_Gastroesophageal_Junction
ENSG00000135956	ENSG00000135956:1	TMEM127	0.7272	Colon_Transverse
ENSG00000277791	ENSG00000277791:1	PSMB3	0.7257	Esophagus_Gastroesophageal_Junction
ENSG00000079277	ENSG00000079277:1	MKNK1	0.7256	Whole_Blood
ENSG00000099785	ENSG00000099785:1	MARCHF2	0.7238	Brain_Amygdala
ENSG00000178665	ENSG00000178665:1	ZNF713	0.7235	Pancreas
ENSG00000167637	ENSG00000167637:2	ZNF283	0.7233	Artery_Tibial
ENSG00000011028	ENSG00000011028:4	MRC2	0.723	Skin_Not_Sun_Exposed
ENSG00000131055	ENSG00000131055:1	COX4I2	0.722	Esophagus_Mucosa
ENSG00000181264	ENSG00000181264:2	TLCD5	0.7219	Colon_Sigmoid
ENSG00000151360	ENSG00000151360:1	ALLC	0.7209	Liver
ENSG00000100994	ENSG00000100994:2	PYGB	0.7201	Esophagus_Muscularis
ENSG00000171132	ENSG00000171132:1	PRKCE	0.7186	Cells_Cultured_fibroblasts
ENSG00000135835	ENSG00000135835:3	KIAA1614	0.7179	Nerve_Tibial
ENSG00000178665	ENSG00000178665:1	ZNF713	0.7175	Muscle_Skeletal
ENSG00000037474	ENSG00000037474:1	NSUN2	0.7169	Small_Intestine_Terminal_Ileum
ENSG00000124164	ENSG00000124164:1	VAPB	0.7162	Esophagus_Gastroesophageal_Junction
ENSG00000135956	ENSG00000135956:1	TMEM127	0.7157	Spleen
ENSG00000170876	ENSG00000170876:2	TMEM43	0.7157	Whole_Blood
ENSG00000184302	ENSG00000184302:2	SIX6	0.7147	Muscle_Skeletal
ENSG00000125967	ENSG00000125967:1	NECAB3	0.7128	Artery_Coronary
ENSG00000107186	ENSG00000107186:1	MPDZ	0.7121	Thyroid
ENSG00000066248	ENSG00000066248:1	NGEF	0.7109	Adipose_Visceral_Omentum
ENSG00000135956	ENSG00000135956:1	TMEM127	0.7101	Adrenal_Gland
ENSG00000183011	ENSG00000183011:1	NAA38	0.7091	Colon_Sigmoid
ENSG00000180376	ENSG00000180376:2	CCDC66	0.709	Whole_Blood
ENSG00000124164	ENSG00000124164:1	VAPB	0.7087	Brain_Hypothalamus
ENSG00000100099	ENSG00000100099:1	HPS4	0.7077	Colon_Sigmoid
ENSG00000152284	ENSG00000152284:1	TCF7L1	0.7077	Artery_Tibial
ENSG00000066248	ENSG00000066248:1	NGEF	0.707	Skin_Not_Sun_Exposed
ENSG00000244165	ENSG00000244165:3	P2RY11	0.7064	Heart_Atrial_Appendage
ENSG00000178665	ENSG00000178665:1	ZNF713	0.7063	Cells_EBV-transformed_lymphocytes
ENSG00000125967	ENSG00000125967:1	NECAB3	0.7055	Cells_Cultured_fibroblasts
ENSG00000125967	ENSG00000125967:1	NECAB3	0.7045	Nerve_Tibial
ENSG00000011028	ENSG00000011028:1	MRC2	0.704	Pituitary
ENSG00000124164	ENSG00000124164:1	VAPB	0.7036	Spleen
ENSG00000197586	ENSG00000197586:3	ENTPD6	0.7024	Adipose_Subcutaneous
ENSG00000167637	ENSG00000167637:1	ZNF283	0.7018	Lung
ENSG00000124164	ENSG00000124164:1	VAPB	0.7013	Artery_Tibial
ENSG00000144021	ENSG00000144021:1	CIAO1	0.7013	Testis
ENSG00000146648	ENSG00000146648:1	EGFR	0.7011	Colon_Transverse
ENSG00000187961	ENSG00000187961:1	KLHL17	0.6993	Skin_Not_Sun_Exposed
ENSG00000181264	ENSG00000181264:2	TLCD5	0.699	Skin_Sun_Exposed
ENSG00000183011	ENSG00000183011:1	NAA38	0.6988	Ovary
ENSG00000142961	ENSG00000142961:1	MOB3C	0.6986	Colon_Transverse
ENSG00000103742	ENSG00000103742:1	IGDCC4	0.6984	Adrenal_Gland
ENSG00000183011	ENSG00000183011:1	NAA38	0.6969	Heart_Atrial_Appendage
ENSG00000107669	ENSG00000107669:2	ATE1	0.6968	Whole_Blood
ENSG00000166394	ENSG00000166394:4	CYB5R2	0.6968	Whole_Blood
ENSG00000169228	ENSG00000169228:1	RAB24	0.6965	Adipose_Subcutaneous
ENSG00000128203	ENSG00000128203:1	ASPHD2	0.6964	Skin_Not_Sun_Exposed
ENSG00000169228	ENSG00000169228:1	RAB24	0.6963	Pancreas
ENSG00000162623	ENSG00000162623:2	TYW3	0.6962	Heart_Left_Ventricle
ENSG00000135956	ENSG00000135956:1	TMEM127	0.6946	Cells_Cultured_fibroblasts
ENSG00000135535	ENSG00000135535:1	CD164	0.6944	Muscle_Skeletal
ENSG00000174611	ENSG00000174611:1	KY	0.6944	Cells_Cultured_fibroblasts
ENSG00000131055	ENSG00000131055:1	COX4I2	0.6942	Adipose_Visceral_Omentum
ENSG00000100979	ENSG00000100979:1	PLTP	0.6938	Adrenal_Gland
ENSG00000135956	ENSG00000135956:1	TMEM127	0.6935	Pancreas
ENSG00000148498	ENSG00000148498:1	PARD3	0.6932	Lung
ENSG00000179598	ENSG00000179598:1	PLD6	0.6932	Thyroid
ENSG00000140455	ENSG00000140455:1	USP3	0.6927	Lung
ENSG00000113319	ENSG00000113319:1	RASGRF2	0.6925	Pancreas
ENSG00000159650	ENSG00000159650:1	UROC1	0.6922	Brain_Substantia_nigra
ENSG00000135956	ENSG00000135956:1	TMEM127	0.692	Small_Intestine_Terminal_Ileum
ENSG00000142961	ENSG00000142961:1	MOB3C	0.6917	Liver
ENSG00000149218	ENSG00000149218:1	ENDOD1	0.6917	Testis
ENSG00000180376	ENSG00000180376:1	CCDC66	0.6911	Pituitary
ENSG00000187961	ENSG00000187961:1	KLHL17	0.6906	Brain_Cerebellum
ENSG00000120708	ENSG00000120708:1	TGFBI	0.6898	Esophagus_Muscularis
ENSG00000100979	ENSG00000100979:1	PLTP	0.6889	Adipose_Visceral_Omentum
ENSG00000163528	ENSG00000163528:2	CHCHD4	0.6886	Heart_Left_Ventricle
ENSG00000276293	ENSG00000276293:1	PIP4K2B	0.6884	Whole_Blood
ENSG00000169228	ENSG00000169228:2	RAB24	0.6871	Brain_Cortex
ENSG00000169228	ENSG00000169228:1	RAB24	0.6869	Colon_Sigmoid
ENSG00000172059	ENSG00000172059:1	KLF11	0.6869	Heart_Left_Ventricle
ENSG00000159899	ENSG00000159899:1	NPR2	0.6867	Liver
ENSG00000154803	ENSG00000154803:1	FLCN	0.6849	Cells_EBV-transformed_lymphocytes
ENSG00000037474	ENSG00000037474:1	NSUN2	0.6837	Adrenal_Gland
ENSG00000134222	ENSG00000134222:2	PSRC1	0.6837	Adipose_Visceral_Omentum
ENSG00000124164	ENSG00000124164:1	VAPB	0.6834	Adrenal_Gland
ENSG00000100099	ENSG00000100099:1	HPS4	0.6828	Prostate
ENSG00000037474	ENSG00000037474:1	NSUN2	0.6827	Minor_Salivary_Gland
ENSG00000137819	ENSG00000137819:2	PAQR5	0.6821	Nerve_Tibial
ENSG00000213853	ENSG00000213853:1	EMP2	0.6821	Esophagus_Gastroesophageal_Junction
ENSG00000124164	ENSG00000124164:1	VAPB	0.6817	Stomach
ENSG00000167637	ENSG00000167637:2	ZNF283	0.6817	Skin_Not_Sun_Exposed
ENSG00000135956	ENSG00000135956:1	TMEM127	0.6814	Breast_Mammary_Tissue
ENSG00000100099	ENSG00000100099:1	HPS4	0.6801	Artery_Coronary
ENSG00000128203	ENSG00000128203:1	ASPHD2	0.6799	Skin_Sun_Exposed
ENSG00000164574	ENSG00000164574:1	GALNT10	0.6793	Artery_Tibial
ENSG00000111860	ENSG00000111860:1	CEP85L	0.6787	Pancreas
ENSG00000088448	ENSG00000088448:1	ANKRD10	0.678	Liver
ENSG00000181264	ENSG00000181264:1	TLCD5	0.6761	Brain_Spinal_cord_cervical_c-1
ENSG00000213853	ENSG00000213853:1	EMP2	0.6742	Skin_Not_Sun_Exposed
ENSG00000111860	ENSG00000111860:1	CEP85L	0.6729	Skin_Sun_Exposed
ENSG00000134222	ENSG00000134222:2	PSRC1	0.6729	Artery_Aorta
ENSG00000116791	ENSG00000116791:4	CRYZ	0.6726	Muscle_Skeletal
ENSG00000183011	ENSG00000183011:1	NAA38	0.6723	Adipose_Visceral_Omentum
ENSG00000100099	ENSG00000100099:2	HPS4	0.6717	Breast_Mammary_Tissue
ENSG00000077549	ENSG00000077549:1	CAPZB	0.6716	Testis
ENSG00000166598	ENSG00000166598:1	HSP90B1	0.6712	Skin_Not_Sun_Exposed
ENSG00000142961	ENSG00000142961:1	MOB3C	0.671	Cells_Cultured_fibroblasts
ENSG00000183386	ENSG00000183386:1	FHL3	0.6709	Prostate
ENSG00000172985	ENSG00000172985:1	SH3RF3	0.6703	Cells_Cultured_fibroblasts
ENSG00000180376	ENSG00000180376:2	CCDC66	0.6702	Minor_Salivary_Gland
ENSG00000183520	ENSG00000183520:1	UTP11	0.67	Adipose_Visceral_Omentum
ENSG00000174611	ENSG00000174611:1	KY	0.6696	Adipose_Visceral_Omentum
ENSG00000100099	ENSG00000100099:1	HPS4	0.6693	Small_Intestine_Terminal_Ileum
ENSG00000170004	ENSG00000170004:2	CHD3	0.6693	Whole_Blood
ENSG00000100979	ENSG00000100979:1	PLTP	0.6692	Artery_Tibial
ENSG00000169228	ENSG00000169228:1	RAB24	0.6684	Liver
ENSG00000037474	ENSG00000037474:1	NSUN2	0.6681	Pancreas
ENSG00000031081	ENSG00000031081:1	ARHGAP31	0.6679	Adipose_Subcutaneous
ENSG00000131055	ENSG00000131055:1	COX4I2	0.6677	Lung
ENSG00000079277	ENSG00000079277:1	MKNK1	0.6673	Lung
ENSG00000161180	ENSG00000161180:1	CCDC116	0.667	Adipose_Visceral_Omentum
ENSG00000213853	ENSG00000213853:1	EMP2	0.6662	Skin_Sun_Exposed
ENSG00000187961	ENSG00000187961:1	KLHL17	0.6661	Skin_Sun_Exposed
ENSG00000100099	ENSG00000100099:1	HPS4	0.6655	Cells_EBV-transformed_lymphocytes
ENSG00000123095	ENSG00000123095:1	BHLHE41	0.6654	Skin_Not_Sun_Exposed
ENSG00000119878	ENSG00000119878:1	CRIPT	0.6649	Heart_Atrial_Appendage
ENSG00000108654	ENSG00000108654:1	DDX5	0.6646	Pancreas
ENSG00000100099	ENSG00000100099:1	HPS4	0.6643	Heart_Left_Ventricle
ENSG00000149634	ENSG00000149634:3	SPATA25	0.6638	Adipose_Visceral_Omentum
ENSG00000128203	ENSG00000128203:1	ASPHD2	0.6621	Esophagus_Mucosa
ENSG00000088387	ENSG00000088387:1	DOCK9	0.6618	Nerve_Tibial
ENSG00000213853	ENSG00000213853:1	EMP2	0.6618	Muscle_Skeletal
ENSG00000119878	ENSG00000119878:1	CRIPT	0.6602	Esophagus_Gastroesophageal_Junction
ENSG00000100979	ENSG00000100979:1	PLTP	0.6601	Muscle_Skeletal
ENSG00000132510	ENSG00000132510:1	KDM6B	0.66	Brain_Cortex
ENSG00000183762	ENSG00000183762:1	KREMEN1	0.6599	Adipose_Subcutaneous
ENSG00000003137	ENSG00000003137:1	CYP26B1	0.6598	Adipose_Visceral_Omentum
ENSG00000205356	ENSG00000205356:2	TECPR1	0.6598	Esophagus_Muscularis
ENSG00000142961	ENSG00000142961:1	MOB3C	0.6597	Nerve_Tibial
ENSG00000170260	ENSG00000170260:2	ZNF212	0.6596	Skin_Sun_Exposed
ENSG00000183762	ENSG00000183762:1	KREMEN1	0.6596	Adipose_Visceral_Omentum
ENSG00000124164	ENSG00000124164:1	VAPB	0.6594	Adipose_Subcutaneous
ENSG00000188897	ENSG00000188897:3	AC099489.1	0.6594	Nerve_Tibial
ENSG00000124164	ENSG00000124164:1	VAPB	0.6593	Heart_Left_Ventricle
ENSG00000174611	ENSG00000174611:1	KY	0.6587	Nerve_Tibial
ENSG00000100979	ENSG00000100979:1	PLTP	0.6583	Pituitary
ENSG00000120262	ENSG00000120262:1	CCDC170	0.6582	Spleen
ENSG00000124164	ENSG00000124164:1	VAPB	0.6582	Cells_Cultured_fibroblasts
ENSG00000120708	ENSG00000120708:2	TGFBI	0.6579	Nerve_Tibial
ENSG00000204644	ENSG00000204644:2	ZFP57	0.6577	Pituitary
ENSG00000011028	ENSG00000011028:1	MRC2	0.6573	Colon_Sigmoid
ENSG00000183011	ENSG00000183011:1	NAA38	0.657	Esophagus_Mucosa
ENSG00000169894	ENSG00000169894:1	MUC3A	0.6566	Liver
ENSG00000099785	ENSG00000099785:1	MARCHF2	0.6564	Brain_Cortex
ENSG00000162623	ENSG00000162623:2	TYW3	0.656	Heart_Atrial_Appendage
ENSG00000026508	ENSG00000026508:1	CD44	0.6557	Artery_Tibial
ENSG00000166387	ENSG00000166387:1	PPFIBP2	0.6556	Cells_Cultured_fibroblasts
ENSG00000154803	ENSG00000154803:1	FLCN	0.6554	Adrenal_Gland
ENSG00000037474	ENSG00000037474:1	NSUN2	0.6553	Whole_Blood
ENSG00000087085	ENSG00000087085:1	ACHE	0.6553	Liver
ENSG00000183762	ENSG00000183762:1	KREMEN1	0.6544	Pancreas
ENSG00000143515	ENSG00000143515:2	ATP8B2	0.6539	Pancreas
ENSG00000143515	ENSG00000143515:1	ATP8B2	0.6538	Heart_Left_Ventricle
ENSG00000158865	ENSG00000158865:1	SLC5A11	0.6538	Liver
ENSG00000123095	ENSG00000123095:1	BHLHE41	0.6532	Skin_Sun_Exposed
ENSG00000132510	ENSG00000132510:1	KDM6B	0.6532	Esophagus_Muscularis
ENSG00000132510	ENSG00000132510:1	KDM6B	0.653	Cells_Cultured_fibroblasts
ENSG00000168612	ENSG00000168612:3	ZSWIM1	0.653	Adipose_Visceral_Omentum
ENSG00000124164	ENSG00000124164:1	VAPB	0.6529	Esophagus_Muscularis
ENSG00000178665	ENSG00000178665:1	ZNF713	0.6529	Thyroid
ENSG00000099785	ENSG00000099785:1	MARCHF2	0.6528	Uterus
ENSG00000119878	ENSG00000119878:1	CRIPT	0.6523	Breast_Mammary_Tissue
ENSG00000100979	ENSG00000100979:1	PLTP	0.6522	Colon_Sigmoid
ENSG00000079257	ENSG00000079257:2	LXN	0.651	Skin_Sun_Exposed
ENSG00000100994	ENSG00000100994:2	PYGB	0.6502	Skin_Sun_Exposed
ENSG00000031081	ENSG00000031081:1	ARHGAP31	0.6498	Adipose_Visceral_Omentum
ENSG00000105287	ENSG00000105287:1	PRKD2	0.6488	Cells_EBV-transformed_lymphocytes
ENSG00000100099	ENSG00000100099:1	HPS4	0.6479	Esophagus_Mucosa
ENSG00000165895	ENSG00000165895:1	ARHGAP42	0.6477	Artery_Tibial
ENSG00000120875	ENSG00000120875:1	DUSP4	0.6476	Muscle_Skeletal
ENSG00000124164	ENSG00000124164:1	VAPB	0.6476	Nerve_Tibial
ENSG00000197586	ENSG00000197586:1	ENTPD6	0.6475	Small_Intestine_Terminal_Ileum
ENSG00000131055	ENSG00000131055:1	COX4I2	0.6473	Stomach
ENSG00000187961	ENSG00000187961:1	KLHL17	0.6471	Cells_EBV-transformed_lymphocytes
ENSG00000264522	ENSG00000264522:1	OTUD7B	0.6464	Skin_Not_Sun_Exposed
ENSG00000120262	ENSG00000120262:1	CCDC170	0.6463	Adrenal_Gland
ENSG00000203896	ENSG00000203896:1	LIME1	0.6456	Artery_Tibial
ENSG00000185340	ENSG00000185340:1	GAS2L1	0.6454	Spleen
ENSG00000115306	ENSG00000115306:3	SPTBN1	0.6443	Artery_Tibial
ENSG00000037474	ENSG00000037474:1	NSUN2	0.6442	Uterus
ENSG00000172059	ENSG00000172059:1	KLF11	0.6439	Brain_Cerebellum
ENSG00000131055	ENSG00000131055:1	COX4I2	0.6437	Spleen
ENSG00000142599	ENSG00000142599:1	RERE	0.6431	Adipose_Subcutaneous
ENSG00000078177	ENSG00000078177:1	N4BP2	0.643	Cells_EBV-transformed_lymphocytes
ENSG00000213853	ENSG00000213853:1	EMP2	0.6424	Nerve_Tibial
ENSG00000105173	ENSG00000105173:1	CCNE1	0.6416	Lung
ENSG00000169504	ENSG00000169504:1	CLIC4	0.6413	Pancreas
ENSG00000119878	ENSG00000119878:1	CRIPT	0.6407	Skin_Sun_Exposed
ENSG00000253276	ENSG00000253276:1	CCDC71L	0.6407	Adipose_Subcutaneous
ENSG00000073060	ENSG00000073060:1	SCARB1	0.6405	Colon_Transverse
ENSG00000124164	ENSG00000124164:1	VAPB	0.6398	Brain_Spinal_cord_cervical_c-1
ENSG00000100099	ENSG00000100099:1	HPS4	0.6393	Ovary
ENSG00000174611	ENSG00000174611:1	KY	0.6382	Esophagus_Gastroesophageal_Junction
ENSG00000083857	ENSG00000083857:1	FAT1	0.6381	Heart_Atrial_Appendage
ENSG00000108556	ENSG00000108556:1	CHRNE	0.6378	Brain_Cerebellum
ENSG00000213347	ENSG00000213347:3	MXD3	0.6377	Nerve_Tibial
ENSG00000088888	ENSG00000088888:1	MAVS	0.6375	Adrenal_Gland
ENSG00000087085	ENSG00000087085:2	ACHE	0.6371	Artery_Aorta
ENSG00000181264	ENSG00000181264:1	TLCD5	0.6367	Brain_Putamen_basal_ganglia
ENSG00000131055	ENSG00000131055:1	COX4I2	0.6364	Small_Intestine_Terminal_Ileum
ENSG00000100099	ENSG00000100099:1	HPS4	0.6362	Heart_Atrial_Appendage
ENSG00000158865	ENSG00000158865:1	SLC5A11	0.6357	Adipose_Visceral_Omentum
ENSG00000066248	ENSG00000066248:1	NGEF	0.6355	Minor_Salivary_Gland
ENSG00000124164	ENSG00000124164:1	VAPB	0.6355	Colon_Transverse
ENSG00000037474	ENSG00000037474:1	NSUN2	0.6351	Ovary
ENSG00000066248	ENSG00000066248:1	NGEF	0.6351	Vagina
ENSG00000037474	ENSG00000037474:1	NSUN2	0.635	Colon_Sigmoid
ENSG00000183520	ENSG00000183520:1	UTP11	0.6347	Lung
ENSG00000183762	ENSG00000183762:1	KREMEN1	0.6346	Adrenal_Gland
ENSG00000203896	ENSG00000203896:2	LIME1	0.6346	Artery_Aorta
ENSG00000100104	ENSG00000100104:1	SRRD	0.6345	Skin_Not_Sun_Exposed
ENSG00000120156	ENSG00000120156:1	TEK	0.6339	Artery_Aorta
ENSG00000160305	ENSG00000160305:1	DIP2A	0.6331	Adrenal_Gland
ENSG00000179833	ENSG00000179833:1	SERTAD2	0.6329	Adipose_Visceral_Omentum
ENSG00000158865	ENSG00000158865:1	SLC5A11	0.6325	Whole_Blood
ENSG00000135956	ENSG00000135956:1	TMEM127	0.632	Brain_Cerebellum
ENSG00000131055	ENSG00000131055:1	COX4I2	0.6317	Adipose_Subcutaneous
ENSG00000120370	ENSG00000120370:3	GORAB	0.6313	Testis
ENSG00000179833	ENSG00000179833:1	SERTAD2	0.6311	Whole_Blood
ENSG00000213853	ENSG00000213853:1	EMP2	0.6309	Colon_Sigmoid
ENSG00000132510	ENSG00000132510:1	KDM6B	0.6302	Skin_Not_Sun_Exposed
ENSG00000137076	ENSG00000137076:1	TLN1	0.6302	Cells_EBV-transformed_lymphocytes
ENSG00000158865	ENSG00000158865:1	SLC5A11	0.6296	Breast_Mammary_Tissue
ENSG00000130702	ENSG00000130702:1	LAMA5	0.6295	Breast_Mammary_Tissue
ENSG00000183011	ENSG00000183011:1	NAA38	0.6293	Brain_Hypothalamus
ENSG00000113389	ENSG00000113389:1	NPR3	0.629	Adrenal_Gland
ENSG00000106511	ENSG00000106511:1	MEOX2	0.6286	Brain_Nucleus_accumbens_basal_ganglia
ENSG00000124164	ENSG00000124164:1	VAPB	0.6284	Brain_Amygdala
ENSG00000134317	ENSG00000134317:2	GRHL1	0.6277	Brain_Cerebellum
ENSG00000134222	ENSG00000134222:1	PSRC1	0.6276	Heart_Left_Ventricle
ENSG00000108654	ENSG00000108654:1	DDX5	0.6272	Prostate
ENSG00000174611	ENSG00000174611:1	KY	0.6264	Adrenal_Gland
ENSG00000183762	ENSG00000183762:1	KREMEN1	0.6264	Breast_Mammary_Tissue
ENSG00000037474	ENSG00000037474:1	NSUN2	0.6257	Lung
ENSG00000179833	ENSG00000179833:1	SERTAD2	0.6248	Adipose_Subcutaneous
ENSG00000037474	ENSG00000037474:1	NSUN2	0.6241	Artery_Coronary
ENSG00000131055	ENSG00000131055:1	COX4I2	0.6239	Esophagus_Gastroesophageal_Junction
ENSG00000181264	ENSG00000181264:1	TLCD5	0.6239	Brain_Caudate_basal_ganglia
ENSG00000204946	ENSG00000204946:4	ZNF783	0.6238	Colon_Transverse
ENSG00000108556	ENSG00000108556:1	CHRNE	0.6234	Brain_Cerebellar_Hemisphere
ENSG00000165895	ENSG00000165895:1	ARHGAP42	0.6232	Artery_Aorta
ENSG00000088888	ENSG00000088888:1	MAVS	0.6231	Spleen
ENSG00000158865	ENSG00000158865:1	SLC5A11	0.6231	Adipose_Subcutaneous
ENSG00000171813	ENSG00000171813:2	PWWP2B	0.6229	Skin_Not_Sun_Exposed
ENSG00000180376	ENSG00000180376:1	CCDC66	0.6229	Brain_Nucleus_accumbens_basal_ganglia
ENSG00000142961	ENSG00000142961:1	MOB3C	0.6224	Heart_Left_Ventricle
ENSG00000108960	ENSG00000108960:1	MMD	0.622	Skin_Sun_Exposed
ENSG00000124164	ENSG00000124164:1	VAPB	0.6219	Skin_Not_Sun_Exposed
ENSG00000158865	ENSG00000158865:1	SLC5A11	0.6215	Cells_EBV-transformed_lymphocytes
ENSG00000125967	ENSG00000125967:1	NECAB3	0.6209	Brain_Nucleus_accumbens_basal_ganglia
ENSG00000187961	ENSG00000187961:1	KLHL17	0.6207	Thyroid
ENSG00000167601	ENSG00000167601:1	AXL	0.6205	Minor_Salivary_Gland
ENSG00000158865	ENSG00000158865:1	SLC5A11	0.6199	Artery_Aorta
ENSG00000079257	ENSG00000079257:2	LXN	0.6198	Skin_Not_Sun_Exposed
ENSG00000124257	ENSG00000124257:2	NEURL2	0.6194	Colon_Sigmoid
ENSG00000037474	ENSG00000037474:1	NSUN2	0.6193	Heart_Atrial_Appendage
ENSG00000124257	ENSG00000124257:1	NEURL2	0.6183	Adipose_Visceral_Omentum
ENSG00000179832	ENSG00000179832:1	MROH1	0.6175	Brain_Cerebellar_Hemisphere
ENSG00000203896	ENSG00000203896:1	LIME1	0.6175	Lung
ENSG00000103549	ENSG00000103549:2	RNF40	0.6166	Whole_Blood
ENSG00000124104	ENSG00000124104:1	SNX21	0.6158	Whole_Blood
ENSG00000183762	ENSG00000183762:1	KREMEN1	0.6158	Liver
ENSG00000198478	ENSG00000198478:1	SH3BGRL2	0.6157	Brain_Cortex
ENSG00000213853	ENSG00000213853:1	EMP2	0.6147	Pancreas
ENSG00000142961	ENSG00000142961:1	MOB3C	0.6141	Heart_Atrial_Appendage
ENSG00000158865	ENSG00000158865:1	SLC5A11	0.6141	Colon_Sigmoid
ENSG00000174611	ENSG00000174611:1	KY	0.6134	Esophagus_Muscularis
ENSG00000158865	ENSG00000158865:1	SLC5A11	0.6133	Artery_Tibial
ENSG00000181264	ENSG00000181264:1	TLCD5	0.613	Ovary
ENSG00000125967	ENSG00000125967:1	NECAB3	0.6127	Artery_Tibial
ENSG00000037474	ENSG00000037474:1	NSUN2	0.6125	Esophagus_Gastroesophageal_Junction
ENSG00000180767	ENSG00000180767:2	CHST13	0.6125	Adipose_Visceral_Omentum
ENSG00000244754	ENSG00000244754:1	N4BP2L2	0.6124	Artery_Tibial
ENSG00000205356	ENSG00000205356:1	TECPR1	0.6122	Thyroid
ENSG00000134222	ENSG00000134222:2	PSRC1	0.6114	Artery_Tibial
ENSG00000066248	ENSG00000066248:1	NGEF	0.6107	Thyroid
ENSG00000107672	ENSG00000107672:2	NSMCE4A	0.6107	Cells_Cultured_fibroblasts
ENSG00000134222	ENSG00000134222:1	PSRC1	0.6106	Brain_Nucleus_accumbens_basal_ganglia
ENSG00000124164	ENSG00000124164:1	VAPB	0.6101	Brain_Caudate_basal_ganglia
ENSG00000113389	ENSG00000113389:1	NPR3	0.6098	Lung
ENSG00000158865	ENSG00000158865:1	SLC5A11	0.6097	Stomach
ENSG00000142599	ENSG00000142599:1	RERE	0.6093	Nerve_Tibial
ENSG00000203896	ENSG00000203896:1	LIME1	0.6093	Cells_Cultured_fibroblasts
ENSG00000213853	ENSG00000213853:2	EMP2	0.6089	Breast_Mammary_Tissue
ENSG00000132510	ENSG00000132510:1	KDM6B	0.6088	Esophagus_Gastroesophageal_Junction
ENSG00000213853	ENSG00000213853:2	EMP2	0.6087	Adipose_Visceral_Omentum
ENSG00000100979	ENSG00000100979:1	PLTP	0.6085	Lung
ENSG00000143515	ENSG00000143515:1	ATP8B2	0.6083	Stomach
ENSG00000170852	ENSG00000170852:1	KBTBD2	0.6079	Pituitary
ENSG00000180767	ENSG00000180767:2	CHST13	0.6077	Adipose_Subcutaneous
ENSG00000158865	ENSG00000158865:1	SLC5A11	0.6075	Cells_Cultured_fibroblasts
ENSG00000158865	ENSG00000158865:1	SLC5A11	0.607	Lung
ENSG00000165895	ENSG00000165895:1	ARHGAP42	0.6068	Artery_Coronary
ENSG00000120262	ENSG00000120262:3	CCDC170	0.6065	Brain_Frontal_Cortex_BA9
ENSG00000180767	ENSG00000180767:1	CHST13	0.6065	Artery_Aorta
ENSG00000100395	ENSG00000100395:1	L3MBTL2	0.6062	Cells_EBV-transformed_lymphocytes
ENSG00000150347	ENSG00000150347:1	ARID5B	0.606	Brain_Caudate_basal_ganglia
ENSG00000134222	ENSG00000134222:1	PSRC1	0.6059	Brain_Caudate_basal_ganglia
ENSG00000180767	ENSG00000180767:1	CHST13	0.6058	Lung
ENSG00000179833	ENSG00000179833:1	SERTAD2	0.6054	Esophagus_Muscularis
ENSG00000160256	ENSG00000160256:2	FAM207A	0.6049	Adipose_Subcutaneous
ENSG00000126804	ENSG00000126804:1	ZBTB1	0.6047	Brain_Frontal_Cortex_BA9
ENSG00000160712	ENSG00000160712:1	IL6R	0.6047	Cells_EBV-transformed_lymphocytes
ENSG00000167601	ENSG00000167601:2	AXL	0.6042	Esophagus_Muscularis
ENSG00000132510	ENSG00000132510:1	KDM6B	0.6041	Whole_Blood
ENSG00000264522	ENSG00000264522:1	OTUD7B	0.6038	Skin_Sun_Exposed
ENSG00000112304	ENSG00000112304:2	ACOT13	0.6034	Adipose_Visceral_Omentum
ENSG00000113389	ENSG00000113389:1	NPR3	0.6033	Nerve_Tibial
ENSG00000160305	ENSG00000160305:2	DIP2A	0.6033	Cells_Cultured_fibroblasts
ENSG00000180376	ENSG00000180376:1	CCDC66	0.6029	Brain_Frontal_Cortex_BA9
ENSG00000125945	ENSG00000125945:2	ZNF436	0.6026	Testis
ENSG00000158865	ENSG00000158865:1	SLC5A11	0.6026	Spleen
ENSG00000174611	ENSG00000174611:1	KY	0.6025	Esophagus_Mucosa
ENSG00000122512	ENSG00000122512:3	PMS2	0.6016	Whole_Blood
ENSG00000118004	ENSG00000118004:1	COLEC11	0.6013	Thyroid
ENSG00000011028	ENSG00000011028:1	MRC2	0.6012	Heart_Atrial_Appendage
ENSG00000158865	ENSG00000158865:1	SLC5A11	0.6008	Nerve_Tibial
ENSG00000124164	ENSG00000124164:1	VAPB	0.5992	Colon_Sigmoid
ENSG00000071967	ENSG00000071967:1	CYBRD1	0.599	Colon_Sigmoid
ENSG00000124164	ENSG00000124164:1	VAPB	0.5985	Heart_Atrial_Appendage
ENSG00000158865	ENSG00000158865:1	SLC5A11	0.5982	Esophagus_Gastroesophageal_Junction
ENSG00000180767	ENSG00000180767:3	CHST13	0.5982	Whole_Blood
ENSG00000122778	ENSG00000122778:2	KIAA1549	0.5978	Muscle_Skeletal
ENSG00000119878	ENSG00000119878:2	CRIPT	0.5975	Muscle_Skeletal
ENSG00000151612	ENSG00000151612:3	ZNF827	0.5972	Artery_Tibial
ENSG00000142961	ENSG00000142961:1	MOB3C	0.5969	Colon_Sigmoid
ENSG00000158865	ENSG00000158865:1	SLC5A11	0.5968	Artery_Coronary
ENSG00000100979	ENSG00000100979:1	PLTP	0.5967	Adipose_Subcutaneous
ENSG00000180376	ENSG00000180376:2	CCDC66	0.5962	Brain_Cerebellum
ENSG00000037474	ENSG00000037474:1	NSUN2	0.5957	Cells_EBV-transformed_lymphocytes
ENSG00000131055	ENSG00000131055:1	COX4I2	0.5957	Skin_Sun_Exposed
ENSG00000203896	ENSG00000203896:1	LIME1	0.5952	Esophagus_Muscularis
ENSG00000180767	ENSG00000180767:1	CHST13	0.595	Prostate
ENSG00000124257	ENSG00000124257:1	NEURL2	0.5949	Artery_Aorta
ENSG00000203896	ENSG00000203896:1	LIME1	0.5946	Nerve_Tibial
ENSG00000158865	ENSG00000158865:1	SLC5A11	0.5942	Pancreas
ENSG00000186716	ENSG00000186716:2	BCR	0.5941	Nerve_Tibial
ENSG00000158865	ENSG00000158865:1	SLC5A11	0.5927	Minor_Salivary_Gland
ENSG00000134222	ENSG00000134222:1	PSRC1	0.5926	Skin_Not_Sun_Exposed
ENSG00000151292	ENSG00000151292:1	CSNK1G3	0.5926	Brain_Nucleus_accumbens_basal_ganglia
ENSG00000124164	ENSG00000124164:1	VAPB	0.5919	Pituitary
ENSG00000100979	ENSG00000100979:1	PLTP	0.5917	Artery_Aorta
ENSG00000158865	ENSG00000158865:1	SLC5A11	0.5917	Adrenal_Gland
ENSG00000180767	ENSG00000180767:1	CHST13	0.5917	Stomach
ENSG00000198807	ENSG00000198807:1	PAX9	0.5916	Thyroid
ENSG00000160838	ENSG00000160838:1	LRRC71	0.5907	Muscle_Skeletal
ENSG00000158865	ENSG00000158865:1	SLC5A11	0.5906	Skin_Not_Sun_Exposed
ENSG00000183426	ENSG00000183426:1	NPIPA1	0.5905	Artery_Tibial
ENSG00000183793	ENSG00000183793:1	NPIPA5	0.5905	Artery_Tibial
ENSG00000183426	ENSG00000183426:1	NPIPA1	0.5904	Breast_Mammary_Tissue
ENSG00000183793	ENSG00000183793:1	NPIPA5	0.5903	Breast_Mammary_Tissue
ENSG00000100099	ENSG00000100099:1	HPS4	0.5896	Kidney_Cortex
ENSG00000120875	ENSG00000120875:1	DUSP4	0.5886	Artery_Tibial
ENSG00000136930	ENSG00000136930:1	PSMB7	0.5883	Artery_Aorta
ENSG00000183762	ENSG00000183762:1	KREMEN1	0.5883	Artery_Tibial
ENSG00000183426	ENSG00000183426:1	NPIPA1	0.5881	Adipose_Visceral_Omentum
ENSG00000099785	ENSG00000099785:1	MARCHF2	0.588	Prostate
ENSG00000105655	ENSG00000105655:1	ISYNA1	0.588	Muscle_Skeletal
ENSG00000183793	ENSG00000183793:1	NPIPA5	0.588	Adipose_Visceral_Omentum
ENSG00000183426	ENSG00000183426:1	NPIPA1	0.5879	Liver
ENSG00000183793	ENSG00000183793:1	NPIPA5	0.5878	Liver
ENSG00000108654	ENSG00000108654:1	DDX5	0.5875	Adipose_Visceral_Omentum
ENSG00000213853	ENSG00000213853:1	EMP2	0.5875	Artery_Tibial
ENSG00000198467	ENSG00000198467:1	TPM2	0.5869	Muscle_Skeletal
ENSG00000158865	ENSG00000158865:1	SLC5A11	0.5867	Esophagus_Muscularis
ENSG00000118004	ENSG00000118004:1	COLEC11	0.5862	Pancreas
ENSG00000132510	ENSG00000132510:1	KDM6B	0.586	Skin_Sun_Exposed
ENSG00000178177	ENSG00000178177:1	LCORL	0.5858	Esophagus_Gastroesophageal_Junction
ENSG00000244165	ENSG00000244165:3	P2RY11	0.5842	Stomach
ENSG00000144218	ENSG00000144218:1	AFF3	0.5837	Spleen
ENSG00000158865	ENSG00000158865:1	SLC5A11	0.5832	Muscle_Skeletal
ENSG00000124164	ENSG00000124164:1	VAPB	0.5831	Brain_Putamen_basal_ganglia
ENSG00000064989	ENSG00000064989:1	CALCRL	0.5827	Artery_Tibial
ENSG00000142961	ENSG00000142961:1	MOB3C	0.5824	Esophagus_Muscularis
ENSG00000158865	ENSG00000158865:1	SLC5A11	0.5824	Pituitary
ENSG00000180806	ENSG00000180806:1	HOXC9	0.5821	Adrenal_Gland
ENSG00000100211	ENSG00000100211:1	CBY1	0.5815	Colon_Sigmoid
ENSG00000166275	ENSG00000166275:2	BORCS7	0.5813	Pancreas
ENSG00000120262	ENSG00000120262:1	CCDC170	0.5812	Artery_Tibial
ENSG00000143515	ENSG00000143515:1	ATP8B2	0.5811	Liver
ENSG00000104852	ENSG00000104852:1	SNRNP70	0.581	Brain_Caudate_basal_ganglia
ENSG00000180806	ENSG00000180806:1	HOXC9	0.5807	Adipose_Visceral_Omentum
ENSG00000214435	ENSG00000214435:1	AS3MT	0.5805	Pancreas
ENSG00000180767	ENSG00000180767:1	CHST13	0.5804	Skin_Not_Sun_Exposed
ENSG00000088448	ENSG00000088448:3	ANKRD10	0.5803	Nerve_Tibial
ENSG00000183426	ENSG00000183426:1	NPIPA1	0.5799	Artery_Aorta
ENSG00000183793	ENSG00000183793:1	NPIPA5	0.5797	Artery_Aorta
ENSG00000158865	ENSG00000158865:1	SLC5A11	0.5792	Prostate
ENSG00000158865	ENSG00000158865:1	SLC5A11	0.5789	Colon_Transverse
ENSG00000108509	ENSG00000108509:2	CAMTA2	0.5786	Ovary
ENSG00000158865	ENSG00000158865:1	SLC5A11	0.5779	Esophagus_Mucosa
ENSG00000100979	ENSG00000100979:1	PLTP	0.5775	Stomach
ENSG00000180767	ENSG00000180767:2	CHST13	0.5767	Esophagus_Muscularis
ENSG00000183426	ENSG00000183426:1	NPIPA1	0.5765	Whole_Blood
ENSG00000183793	ENSG00000183793:1	NPIPA5	0.5763	Whole_Blood
ENSG00000144021	ENSG00000144021:2	CIAO1	0.5756	Brain_Cortex
ENSG00000144824	ENSG00000144824:1	PHLDB2	0.5756	Thyroid
ENSG00000183426	ENSG00000183426:1	NPIPA1	0.5755	Adipose_Subcutaneous
ENSG00000183793	ENSG00000183793:1	NPIPA5	0.5751	Adipose_Subcutaneous
ENSG00000183793	ENSG00000183793:1	NPIPA5	0.575	Cells_Cultured_fibroblasts
ENSG00000167637	ENSG00000167637:1	ZNF283	0.5748	Pancreas
ENSG00000169246	ENSG00000169246:2	NPIPB3	0.5748	Cells_Cultured_fibroblasts
ENSG00000103549	ENSG00000103549:2	RNF40	0.574	Artery_Tibial
ENSG00000132510	ENSG00000132510:1	KDM6B	0.5738	Artery_Aorta
ENSG00000120262	ENSG00000120262:1	CCDC170	0.5736	Skin_Sun_Exposed
ENSG00000183793	ENSG00000183793:1	NPIPA5	0.573	Stomach
ENSG00000183426	ENSG00000183426:1	NPIPA1	0.5729	Stomach
ENSG00000119878	ENSG00000119878:1	CRIPT	0.5727	Adrenal_Gland
ENSG00000196337	ENSG00000196337:2	CGB7	0.5724	Skin_Sun_Exposed
ENSG00000213949	ENSG00000213949:1	ITGA1	0.5723	Stomach
ENSG00000180767	ENSG00000180767:1	CHST13	0.5717	Pituitary
ENSG00000119878	ENSG00000119878:1	CRIPT	0.5713	Colon_Sigmoid
ENSG00000142599	ENSG00000142599:1	RERE	0.5711	Cells_Cultured_fibroblasts
ENSG00000124257	ENSG00000124257:1	NEURL2	0.571	Adipose_Subcutaneous
ENSG00000179889	ENSG00000179889:1	PDXDC1	0.5705	Muscle_Skeletal
ENSG00000183426	ENSG00000183426:1	NPIPA1	0.5705	Muscle_Skeletal
ENSG00000151135	ENSG00000151135:1	TMEM263	0.5704	Adipose_Subcutaneous
ENSG00000183793	ENSG00000183793:1	NPIPA5	0.5703	Muscle_Skeletal
ENSG00000117410	ENSG00000117410:3	ATP6V0B	0.57	Cells_Cultured_fibroblasts
ENSG00000064989	ENSG00000064989:1	CALCRL	0.5696	Artery_Aorta
ENSG00000144021	ENSG00000144021:2	CIAO1	0.5694	Nerve_Tibial
ENSG00000183762	ENSG00000183762:1	KREMEN1	0.5692	Thyroid
ENSG00000105287	ENSG00000105287:1	PRKD2	0.569	Colon_Sigmoid
ENSG00000119878	ENSG00000119878:1	CRIPT	0.5686	Adipose_Subcutaneous
ENSG00000183431	ENSG00000183431:1	SF3A3	0.5685	Cells_EBV-transformed_lymphocytes
ENSG00000146648	ENSG00000146648:2	EGFR	0.5684	Heart_Left_Ventricle
ENSG00000125089	ENSG00000125089:1	SH3TC1	0.5674	Spleen
ENSG00000185340	ENSG00000185340:3	GAS2L1	0.5672	Artery_Tibial
ENSG00000180767	ENSG00000180767:2	CHST13	0.567	Breast_Mammary_Tissue
ENSG00000119878	ENSG00000119878:1	CRIPT	0.5667	Artery_Tibial
ENSG00000198807	ENSG00000198807:1	PAX9	0.5664	Artery_Aorta
ENSG00000141030	ENSG00000141030:1	COPS3	0.5661	Whole_Blood
ENSG00000171813	ENSG00000171813:2	PWWP2B	0.566	Adipose_Subcutaneous
ENSG00000162623	ENSG00000162623:2	TYW3	0.5654	Vagina
ENSG00000144214	ENSG00000144214:2	LYG1	0.5651	Lung
ENSG00000179546	ENSG00000179546:2	HTR1D	0.565	Lung
ENSG00000100979	ENSG00000100979:1	PLTP	0.5649	Artery_Coronary
ENSG00000183426	ENSG00000183426:1	NPIPA1	0.5647	Colon_Sigmoid
ENSG00000183793	ENSG00000183793:1	NPIPA5	0.5646	Colon_Sigmoid
ENSG00000213853	ENSG00000213853:2	EMP2	0.5646	Esophagus_Mucosa
ENSG00000213853	ENSG00000213853:2	EMP2	0.5643	Adipose_Subcutaneous
ENSG00000187961	ENSG00000187961:1	KLHL17	0.5638	Pituitary
ENSG00000132854	ENSG00000132854:2	KANK4	0.5631	Nerve_Tibial
ENSG00000151135	ENSG00000151135:1	TMEM263	0.5627	Artery_Tibial
ENSG00000119878	ENSG00000119878:1	CRIPT	0.5626	Pituitary
ENSG00000119878	ENSG00000119878:1	CRIPT	0.5625	Cells_Cultured_fibroblasts
ENSG00000066248	ENSG00000066248:1	NGEF	0.5624	Skin_Sun_Exposed
ENSG00000169228	ENSG00000169228:1	RAB24	0.5624	Prostate
ENSG00000037474	ENSG00000037474:2	NSUN2	0.5613	Muscle_Skeletal
ENSG00000183426	ENSG00000183426:1	NPIPA1	0.5613	Lung
ENSG00000183793	ENSG00000183793:1	NPIPA5	0.5612	Lung
ENSG00000183426	ENSG00000183426:1	NPIPA1	0.5611	Brain_Amygdala
ENSG00000183793	ENSG00000183793:1	NPIPA5	0.5611	Brain_Amygdala
ENSG00000158865	ENSG00000158865:1	SLC5A11	0.561	Vagina
ENSG00000071967	ENSG00000071967:1	CYBRD1	0.5606	Nerve_Tibial
ENSG00000169836	ENSG00000169836:1	TACR3	0.5604	Lung
ENSG00000100979	ENSG00000100979:1	PLTP	0.5601	Nerve_Tibial
ENSG00000170260	ENSG00000170260:3	ZNF212	0.5588	Spleen
ENSG00000119408	ENSG00000119408:1	NEK6	0.5586	Thyroid
ENSG00000141030	ENSG00000141030:1	COPS3	0.5583	Artery_Aorta
ENSG00000100991	ENSG00000100991:2	TRPC4AP	0.5577	Breast_Mammary_Tissue
ENSG00000071967	ENSG00000071967:2	CYBRD1	0.557	Artery_Aorta
ENSG00000135956	ENSG00000135956:1	TMEM127	0.557	Brain_Nucleus_accumbens_basal_ganglia
ENSG00000264522	ENSG00000264522:1	OTUD7B	0.5568	Whole_Blood
ENSG00000037474	ENSG00000037474:1	NSUN2	0.556	Skin_Not_Sun_Exposed
ENSG00000183426	ENSG00000183426:1	NPIPA1	0.5559	Adrenal_Gland
ENSG00000183793	ENSG00000183793:1	NPIPA5	0.5559	Adrenal_Gland
ENSG00000163050	ENSG00000163050:1	COQ8A	0.555	Prostate
ENSG00000183793	ENSG00000183793:1	NPIPA5	0.5547	Prostate
ENSG00000060138	ENSG00000060138:2	YBX3	0.5546	Adrenal_Gland
ENSG00000158865	ENSG00000158865:1	SLC5A11	0.5546	Ovary
ENSG00000165895	ENSG00000165895:1	ARHGAP42	0.5539	Heart_Left_Ventricle
ENSG00000131055	ENSG00000131055:1	COX4I2	0.5538	Prostate
ENSG00000180767	ENSG00000180767:1	CHST13	0.5538	Small_Intestine_Terminal_Ileum
ENSG00000180767	ENSG00000180767:1	CHST13	0.5537	Colon_Sigmoid
ENSG00000182809	ENSG00000182809:3	CRIP2	0.5534	Whole_Blood
ENSG00000183793	ENSG00000183793:1	NPIPA5	0.5534	Esophagus_Gastroesophageal_Junction
ENSG00000142599	ENSG00000142599:1	RERE	0.5533	Brain_Cortex
ENSG00000083857	ENSG00000083857:1	FAT1	0.5532	Skin_Not_Sun_Exposed
ENSG00000169047	ENSG00000169047:1	IRS1	0.5531	Cells_EBV-transformed_lymphocytes
ENSG00000152767	ENSG00000152767:1	FARP1	0.5529	Stomach
ENSG00000183520	ENSG00000183520:1	UTP11	0.5529	Whole_Blood
ENSG00000158865	ENSG00000158865:1	SLC5A11	0.5528	Skin_Sun_Exposed
ENSG00000183426	ENSG00000183426:1	NPIPA1	0.5525	Minor_Salivary_Gland
ENSG00000163956	ENSG00000163956:1	LRPAP1	0.5523	Whole_Blood
ENSG00000197548	ENSG00000197548:4	ATG7	0.5523	Artery_Aorta
ENSG00000182621	ENSG00000182621:1	PLCB1	0.5521	Nerve_Tibial
ENSG00000170852	ENSG00000170852:1	KBTBD2	0.552	Pancreas
ENSG00000180767	ENSG00000180767:1	CHST13	0.5516	Nerve_Tibial
ENSG00000148396	ENSG00000148396:3	SEC16A	0.5514	Nerve_Tibial
ENSG00000180767	ENSG00000180767:1	CHST13	0.551	Esophagus_Gastroesophageal_Junction
ENSG00000107669	ENSG00000107669:2	ATE1	0.55	Esophagus_Gastroesophageal_Junction
ENSG00000120262	ENSG00000120262:1	CCDC170	0.5497	Brain_Hypothalamus
ENSG00000066248	ENSG00000066248:1	NGEF	0.5496	Lung
ENSG00000183426	ENSG00000183426:1	NPIPA1	0.5496	Artery_Coronary
ENSG00000183793	ENSG00000183793:1	NPIPA5	0.5496	Artery_Coronary
ENSG00000100099	ENSG00000100099:1	HPS4	0.5492	Testis
ENSG00000198807	ENSG00000198807:1	PAX9	0.5488	Artery_Tibial
ENSG00000088888	ENSG00000088888:1	MAVS	0.5484	Adipose_Subcutaneous
ENSG00000122008	ENSG00000122008:1	POLK	0.548	Small_Intestine_Terminal_Ileum
ENSG00000205356	ENSG00000205356:3	TECPR1	0.5476	Artery_Tibial
ENSG00000125618	ENSG00000125618:2	PAX8	0.5474	Artery_Tibial
ENSG00000125378	ENSG00000125378:1	BMP4	0.5468	Brain_Cortex
ENSG00000142961	ENSG00000142961:1	MOB3C	0.5468	Brain_Cerebellar_Hemisphere
ENSG00000203896	ENSG00000203896:1	LIME1	0.5461	Heart_Atrial_Appendage
ENSG00000146648	ENSG00000146648:1	EGFR	0.5457	Adipose_Visceral_Omentum
ENSG00000183426	ENSG00000183426:1	NPIPA1	0.5457	Pancreas
ENSG00000100979	ENSG00000100979:1	PLTP	0.5455	Esophagus_Muscularis
ENSG00000133246	ENSG00000133246:1	PRAM1	0.5455	Lung
ENSG00000203896	ENSG00000203896:2	LIME1	0.5452	Prostate
ENSG00000258890	ENSG00000258890:1	CEP95	0.5449	Esophagus_Mucosa
ENSG00000168612	ENSG00000168612:1	ZSWIM1	0.5445	Adipose_Subcutaneous
ENSG00000162998	ENSG00000162998:1	FRZB	0.5444	Nerve_Tibial
ENSG00000073350	ENSG00000073350:1	LLGL2	0.5439	Pancreas
ENSG00000121797	ENSG00000121797:1	CCRL2	0.5439	Whole_Blood
ENSG00000163050	ENSG00000163050:2	COQ8A	0.5439	Artery_Coronary
ENSG00000197548	ENSG00000197548:1	ATG7	0.5436	Prostate
ENSG00000169228	ENSG00000169228:1	RAB24	0.5434	Brain_Hypothalamus
ENSG00000197548	ENSG00000197548:2	ATG7	0.5433	Spleen
ENSG00000176125	ENSG00000176125:1	UFSP1	0.543	Esophagus_Gastroesophageal_Junction
ENSG00000158865	ENSG00000158865:1	SLC5A11	0.5426	Heart_Atrial_Appendage
ENSG00000154803	ENSG00000154803:1	FLCN	0.5412	Liver
ENSG00000180376	ENSG00000180376:1	CCDC66	0.5412	Uterus
ENSG00000140320	ENSG00000140320:1	BAHD1	0.541	Adipose_Subcutaneous
ENSG00000144455	ENSG00000144455:2	SUMF1	0.541	Adipose_Visceral_Omentum
ENSG00000120262	ENSG00000120262:1	CCDC170	0.5408	Esophagus_Muscularis
ENSG00000203896	ENSG00000203896:1	LIME1	0.5408	Thyroid
ENSG00000180767	ENSG00000180767:1	CHST13	0.5406	Colon_Transverse
ENSG00000171132	ENSG00000171132:1	PRKCE	0.5405	Skin_Not_Sun_Exposed
ENSG00000119878	ENSG00000119878:1	CRIPT	0.5397	Esophagus_Mucosa
ENSG00000183426	ENSG00000183426:1	NPIPA1	0.5395	Heart_Left_Ventricle
ENSG00000183793	ENSG00000183793:1	NPIPA5	0.5395	Heart_Left_Ventricle
ENSG00000106511	ENSG00000106511:1	MEOX2	0.5394	Brain_Frontal_Cortex_BA9
ENSG00000170606	ENSG00000170606:2	HSPA4	0.5391	Artery_Tibial
ENSG00000156265	ENSG00000156265:1	MAP3K7CL	0.5388	Whole_Blood
ENSG00000203896	ENSG00000203896:1	LIME1	0.5387	Heart_Left_Ventricle
ENSG00000138835	ENSG00000138835:1	RGS3	0.5382	Cells_Cultured_fibroblasts
ENSG00000183426	ENSG00000183426:1	NPIPA1	0.5381	Skin_Not_Sun_Exposed
ENSG00000183793	ENSG00000183793:1	NPIPA5	0.5379	Skin_Not_Sun_Exposed
ENSG00000099194	ENSG00000099194:1	SCD	0.5378	Breast_Mammary_Tissue
ENSG00000183426	ENSG00000183426:1	NPIPA1	0.5378	Esophagus_Muscularis
ENSG00000183793	ENSG00000183793:1	NPIPA5	0.5376	Esophagus_Muscularis
ENSG00000149634	ENSG00000149634:1	SPATA25	0.5375	Artery_Aorta
ENSG00000183426	ENSG00000183426:1	NPIPA1	0.5373	Nerve_Tibial
ENSG00000113657	ENSG00000113657:1	DPYSL3	0.5372	Brain_Cerebellum
ENSG00000135956	ENSG00000135956:1	TMEM127	0.5372	Testis
ENSG00000151135	ENSG00000151135:1	TMEM263	0.5371	Breast_Mammary_Tissue
ENSG00000180376	ENSG00000180376:1	CCDC66	0.5371	Brain_Amygdala
ENSG00000183793	ENSG00000183793:1	NPIPA5	0.5369	Nerve_Tibial
ENSG00000135127	ENSG00000135127:1	BICDL1	0.5365	Adipose_Subcutaneous
ENSG00000198478	ENSG00000198478:1	SH3BGRL2	0.5365	Brain_Putamen_basal_ganglia
ENSG00000254852	ENSG00000254852:1	NPIPA2	0.5364	Nerve_Tibial
ENSG00000113389	ENSG00000113389:2	NPR3	0.5363	Cells_Cultured_fibroblasts
ENSG00000119878	ENSG00000119878:1	CRIPT	0.5362	Brain_Cortex
ENSG00000170876	ENSG00000170876:1	TMEM43	0.5362	Spleen
ENSG00000125378	ENSG00000125378:1	BMP4	0.536	Brain_Frontal_Cortex_BA9
ENSG00000176125	ENSG00000176125:1	UFSP1	0.536	Adipose_Visceral_Omentum
ENSG00000244045	ENSG00000244045:1	TMEM199	0.536	Artery_Tibial
ENSG00000158865	ENSG00000158865:1	SLC5A11	0.5359	Small_Intestine_Terminal_Ileum
ENSG00000174945	ENSG00000174945:1	AMZ1	0.5357	Brain_Cortex
ENSG00000176125	ENSG00000176125:1	UFSP1	0.5356	Small_Intestine_Terminal_Ileum
ENSG00000134569	ENSG00000134569:1	LRP4	0.5355	Cells_Cultured_fibroblasts
ENSG00000170606	ENSG00000170606:2	HSPA4	0.5345	Esophagus_Muscularis
ENSG00000183426	ENSG00000183426:1	NPIPA1	0.5345	Pituitary
ENSG00000183793	ENSG00000183793:1	NPIPA5	0.5343	Pituitary
ENSG00000087085	ENSG00000087085:1	ACHE	0.5342	Esophagus_Mucosa
ENSG00000142961	ENSG00000142961:1	MOB3C	0.5342	Thyroid
ENSG00000203896	ENSG00000203896:1	LIME1	0.5339	Adrenal_Gland
ENSG00000158865	ENSG00000158865:1	SLC5A11	0.5333	Uterus
ENSG00000119878	ENSG00000119878:1	CRIPT	0.5331	Artery_Coronary
ENSG00000213853	ENSG00000213853:2	EMP2	0.5327	Spleen
ENSG00000183426	ENSG00000183426:1	NPIPA1	0.5323	Colon_Transverse
ENSG00000183793	ENSG00000183793:1	NPIPA5	0.5323	Colon_Transverse
ENSG00000073350	ENSG00000073350:2	LLGL2	0.5322	Whole_Blood
ENSG00000100994	ENSG00000100994:3	PYGB	0.5321	Cells_Cultured_fibroblasts
ENSG00000213853	ENSG00000213853:1	EMP2	0.5318	Cells_Cultured_fibroblasts
ENSG00000078177	ENSG00000078177:3	N4BP2	0.5316	Muscle_Skeletal
ENSG00000106511	ENSG00000106511:2	MEOX2	0.5315	Artery_Tibial
ENSG00000117410	ENSG00000117410:4	ATP6V0B	0.531	Cells_Cultured_fibroblasts
ENSG00000182621	ENSG00000182621:1	PLCB1	0.5303	Muscle_Skeletal
ENSG00000156113	ENSG00000156113:1	KCNMA1	0.5297	Brain_Cortex
ENSG00000105287	ENSG00000105287:1	PRKD2	0.5294	Artery_Tibial
ENSG00000197586	ENSG00000197586:2	ENTPD6	0.5294	Pancreas
ENSG00000141030	ENSG00000141030:1	COPS3	0.5292	Adipose_Subcutaneous
ENSG00000110075	ENSG00000110075:1	PPP6R3	0.5291	Thyroid
ENSG00000183762	ENSG00000183762:1	KREMEN1	0.5288	Nerve_Tibial
ENSG00000066248	ENSG00000066248:1	NGEF	0.5286	Heart_Atrial_Appendage
ENSG00000113657	ENSG00000113657:1	DPYSL3	0.5286	Brain_Cerebellar_Hemisphere
ENSG00000151292	ENSG00000151292:1	CSNK1G3	0.5286	Testis
ENSG00000037965	ENSG00000037965:2	HOXC8	0.5283	Lung
ENSG00000198807	ENSG00000198807:1	PAX9	0.5282	Skin_Not_Sun_Exposed
ENSG00000197548	ENSG00000197548:2	ATG7	0.5281	Adipose_Visceral_Omentum
ENSG00000162998	ENSG00000162998:1	FRZB	0.5279	Breast_Mammary_Tissue
ENSG00000183793	ENSG00000183793:1	NPIPA5	0.5274	Cells_EBV-transformed_lymphocytes
ENSG00000156103	ENSG00000156103:1	MMP16	0.5273	Lung
ENSG00000100991	ENSG00000100991:1	TRPC4AP	0.5271	Esophagus_Muscularis
ENSG00000088888	ENSG00000088888:1	MAVS	0.527	Lung
ENSG00000146535	ENSG00000146535:1	GNA12	0.5266	Lung
ENSG00000183793	ENSG00000183793:1	NPIPA5	0.5263	Vagina
ENSG00000184347	ENSG00000184347:1	SLIT3	0.5263	Pituitary
ENSG00000124164	ENSG00000124164:1	VAPB	0.5262	Brain_Anterior_cingulate_cortex_BA24
ENSG00000176125	ENSG00000176125:1	UFSP1	0.5254	Breast_Mammary_Tissue
ENSG00000180767	ENSG00000180767:1	CHST13	0.5254	Uterus
ENSG00000170606	ENSG00000170606:1	HSPA4	0.5253	Nerve_Tibial
ENSG00000124164	ENSG00000124164:1	VAPB	0.525	Brain_Nucleus_accumbens_basal_ganglia
ENSG00000135956	ENSG00000135956:1	TMEM127	0.5249	Thyroid
ENSG00000170606	ENSG00000170606:2	HSPA4	0.5244	Adipose_Subcutaneous
ENSG00000099785	ENSG00000099785:1	MARCHF2	0.5242	Brain_Substantia_nigra
ENSG00000183426	ENSG00000183426:1	NPIPA1	0.524	Skin_Sun_Exposed
ENSG00000213853	ENSG00000213853:1	EMP2	0.524	Uterus
ENSG00000183793	ENSG00000183793:1	NPIPA5	0.5238	Skin_Sun_Exposed
ENSG00000198807	ENSG00000198807:2	PAX9	0.5237	Cells_Cultured_fibroblasts
ENSG00000184949	ENSG00000184949:1	FAM227A	0.5235	Brain_Cortex
ENSG00000164889	ENSG00000164889:1	SLC4A2	0.523	Stomach
ENSG00000060138	ENSG00000060138:1	YBX3	0.5227	Liver
ENSG00000119878	ENSG00000119878:1	CRIPT	0.5227	Spleen
ENSG00000144455	ENSG00000144455:2	SUMF1	0.5227	Muscle_Skeletal
ENSG00000151090	ENSG00000151090:1	THRB	0.5225	Heart_Atrial_Appendage
ENSG00000139668	ENSG00000139668:1	WDFY2	0.5223	Nerve_Tibial
ENSG00000079277	ENSG00000079277:1	MKNK1	0.522	Adipose_Visceral_Omentum
ENSG00000183793	ENSG00000183793:1	NPIPA5	0.5217	Ovary
ENSG00000188976	ENSG00000188976:1	NOC2L	0.5215	Liver
ENSG00000198682	ENSG00000198682:1	PAPSS2	0.52	Pancreas
ENSG00000135535	ENSG00000135535:2	CD164	0.5199	Brain_Cortex
ENSG00000148498	ENSG00000148498:1	PARD3	0.5198	Prostate
ENSG00000197586	ENSG00000197586:2	ENTPD6	0.5198	Esophagus_Mucosa
ENSG00000134222	ENSG00000134222:2	PSRC1	0.5196	Brain_Cerebellar_Hemisphere
ENSG00000141030	ENSG00000141030:1	COPS3	0.5196	Colon_Sigmoid
ENSG00000183426	ENSG00000183426:1	NPIPA1	0.5195	Small_Intestine_Terminal_Ileum
ENSG00000183793	ENSG00000183793:1	NPIPA5	0.5195	Small_Intestine_Terminal_Ileum
ENSG00000100099	ENSG00000100099:1	HPS4	0.5181	Minor_Salivary_Gland
ENSG00000131055	ENSG00000131055:1	COX4I2	0.5174	Vagina
ENSG00000100979	ENSG00000100979:1	PLTP	0.5172	Thyroid
ENSG00000180767	ENSG00000180767:1	CHST13	0.5167	Thyroid
ENSG00000180767	ENSG00000180767:1	CHST13	0.5165	Esophagus_Mucosa
ENSG00000139668	ENSG00000139668:1	WDFY2	0.5155	Adipose_Subcutaneous
ENSG00000183386	ENSG00000183386:1	FHL3	0.5155	Kidney_Cortex
ENSG00000254852	ENSG00000254852:1	NPIPA2	0.5152	Skin_Not_Sun_Exposed
ENSG00000151135	ENSG00000151135:1	TMEM263	0.515	Colon_Sigmoid
ENSG00000183426	ENSG00000183426:1	NPIPA1	0.5147	Brain_Spinal_cord_cervical_c-1
ENSG00000144668	ENSG00000144668:1	ITGA9	0.5143	Pituitary
ENSG00000264522	ENSG00000264522:1	OTUD7B	0.5143	Colon_Transverse
ENSG00000084674	ENSG00000084674:1	APOB	0.5142	Muscle_Skeletal
ENSG00000128607	ENSG00000128607:1	KLHDC10	0.5141	Adipose_Visceral_Omentum
ENSG00000158865	ENSG00000158865:1	SLC5A11	0.514	Thyroid
ENSG00000071967	ENSG00000071967:1	CYBRD1	0.5138	Artery_Tibial
ENSG00000203896	ENSG00000203896:1	LIME1	0.5137	Esophagus_Mucosa
ENSG00000099785	ENSG00000099785:1	MARCHF2	0.5134	Pituitary
ENSG00000183793	ENSG00000183793:1	NPIPA5	0.5134	Brain_Spinal_cord_cervical_c-1
ENSG00000181264	ENSG00000181264:1	TLCD5	0.513	Brain_Substantia_nigra
ENSG00000203896	ENSG00000203896:1	LIME1	0.5128	Stomach
ENSG00000108960	ENSG00000108960:1	MMD	0.5127	Brain_Cerebellum
ENSG00000143028	ENSG00000143028:2	SYPL2	0.5117	Liver
ENSG00000183762	ENSG00000183762:1	KREMEN1	0.5116	Skin_Not_Sun_Exposed
ENSG00000101280	ENSG00000101280:1	ANGPT4	0.5114	Colon_Transverse
ENSG00000111860	ENSG00000111860:1	CEP85L	0.5113	Spleen
ENSG00000132510	ENSG00000132510:1	KDM6B	0.5113	Thyroid
ENSG00000180767	ENSG00000180767:1	CHST13	0.511	Heart_Atrial_Appendage
ENSG00000180767	ENSG00000180767:2	CHST13	0.5105	Skin_Sun_Exposed
ENSG00000198026	ENSG00000198026:1	ZNF335	0.5103	Whole_Blood
ENSG00000156103	ENSG00000156103:1	MMP16	0.51	Stomach
ENSG00000088888	ENSG00000088888:1	MAVS	0.5099	Artery_Aorta
ENSG00000170606	ENSG00000170606:2	HSPA4	0.509	Breast_Mammary_Tissue
ENSG00000167601	ENSG00000167601:2	AXL	0.5085	Skin_Sun_Exposed
ENSG00000119878	ENSG00000119878:2	CRIPT	0.5082	Brain_Frontal_Cortex_BA9
ENSG00000119878	ENSG00000119878:1	CRIPT	0.508	Whole_Blood
ENSG00000144455	ENSG00000144455:2	SUMF1	0.5076	Colon_Sigmoid
ENSG00000176125	ENSG00000176125:1	UFSP1	0.5075	Whole_Blood
ENSG00000180767	ENSG00000180767:1	CHST13	0.5074	Brain_Hypothalamus
ENSG00000148498	ENSG00000148498:1	PARD3	0.5073	Esophagus_Mucosa
ENSG00000183426	ENSG00000183426:1	NPIPA1	0.5073	Brain_Cortex
ENSG00000183793	ENSG00000183793:1	NPIPA5	0.5073	Brain_Cortex
ENSG00000088888	ENSG00000088888:1	MAVS	0.5067	Liver
ENSG00000124257	ENSG00000124257:1	NEURL2	0.5067	Lung
ENSG00000162650	ENSG00000162650:2	ATXN7L2	0.5063	Liver
ENSG00000131055	ENSG00000131055:1	COX4I2	0.5061	Heart_Atrial_Appendage
ENSG00000088888	ENSG00000088888:1	MAVS	0.5057	Thyroid
ENSG00000244045	ENSG00000244045:1	TMEM199	0.5054	Stomach
ENSG00000113163	ENSG00000113163:1	CERT1	0.5053	Nerve_Tibial
ENSG00000144810	ENSG00000144810:2	COL8A1	0.505	Nerve_Tibial
ENSG00000112237	ENSG00000112237:1	CCNC	0.5048	Stomach
ENSG00000168769	ENSG00000168769:1	TET2	0.5048	Artery_Tibial
ENSG00000180767	ENSG00000180767:1	CHST13	0.5048	Brain_Substantia_nigra
ENSG00000100991	ENSG00000100991:2	TRPC4AP	0.5047	Cells_Cultured_fibroblasts
ENSG00000185885	ENSG00000185885:3	IFITM1	0.5045	Whole_Blood
ENSG00000205356	ENSG00000205356:1	TECPR1	0.5045	Lung
ENSG00000151135	ENSG00000151135:1	TMEM263	0.5036	Skin_Not_Sun_Exposed
ENSG00000100994	ENSG00000100994:2	PYGB	0.5029	Adipose_Visceral_Omentum
ENSG00000180376	ENSG00000180376:1	CCDC66	0.5028	Brain_Spinal_cord_cervical_c-1
ENSG00000164713	ENSG00000164713:1	BRI3	0.5026	Liver
ENSG00000133246	ENSG00000133246:2	PRAM1	0.5019	Artery_Tibial
ENSG00000170430	ENSG00000170430:4	MGMT	0.5017	Skin_Not_Sun_Exposed
ENSG00000176125	ENSG00000176125:1	UFSP1	0.5016	Minor_Salivary_Gland
ENSG00000254087	ENSG00000254087:1	LYN	0.5016	Skin_Sun_Exposed
ENSG00000198807	ENSG00000198807:1	PAX9	0.5015	Breast_Mammary_Tissue
ENSG00000244045	ENSG00000244045:1	TMEM199	0.5015	Skin_Sun_Exposed
ENSG00000187961	ENSG00000187961:1	KLHL17	0.5013	Nerve_Tibial
ENSG00000144455	ENSG00000144455:2	SUMF1	0.501	Liver
ENSG00000174611	ENSG00000174611:1	KY	0.501	Colon_Sigmoid
ENSG00000183426	ENSG00000183426:1	NPIPA1	0.5009	Esophagus_Mucosa
ENSG00000183793	ENSG00000183793:1	NPIPA5	0.5009	Esophagus_Mucosa
ENSG00000154803	ENSG00000154803:1	FLCN	0.5008	Brain_Hypothalamus
ENSG00000144455	ENSG00000144455:2	SUMF1	0.5007	Spleen
ENSG00000157036	ENSG00000157036:1	EXOG	0.5006	Adrenal_Gland
ENSG00000110075	ENSG00000110075:1	PPP6R3	0.4998	Ovary
ENSG00000120049	ENSG00000120049:1	KCNIP2	0.4998	Muscle_Skeletal
ENSG00000180376	ENSG00000180376:3	CCDC66	0.4998	Spleen
ENSG00000100099	ENSG00000100099:2	HPS4	0.4996	Brain_Cortex
ENSG00000184949	ENSG00000184949:1	FAM227A	0.4994	Thyroid
ENSG00000002726	ENSG00000002726:1	AOC1	0.4993	Esophagus_Muscularis
ENSG00000037474	ENSG00000037474:1	NSUN2	0.4991	Stomach
ENSG00000157036	ENSG00000157036:1	EXOG	0.4986	Nerve_Tibial
ENSG00000170606	ENSG00000170606:2	HSPA4	0.4984	Cells_Cultured_fibroblasts
ENSG00000113600	ENSG00000113600:1	C9	0.4982	Liver
ENSG00000124356	ENSG00000124356:1	STAMBP	0.498	Artery_Aorta
ENSG00000198807	ENSG00000198807:1	PAX9	0.4979	Skin_Sun_Exposed
ENSG00000180376	ENSG00000180376:1	CCDC66	0.4978	Brain_Substantia_nigra
ENSG00000135127	ENSG00000135127:2	BICDL1	0.4977	Pancreas
ENSG00000204644	ENSG00000204644:2	ZFP57	0.4976	Artery_Aorta
ENSG00000156103	ENSG00000156103:1	MMP16	0.4974	Breast_Mammary_Tissue
ENSG00000115825	ENSG00000115825:2	PRKD3	0.4973	Adipose_Visceral_Omentum
ENSG00000244045	ENSG00000244045:1	TMEM199	0.4968	Adipose_Visceral_Omentum
ENSG00000244045	ENSG00000244045:1	TMEM199	0.4959	Adipose_Subcutaneous
ENSG00000170606	ENSG00000170606:2	HSPA4	0.4954	Skin_Sun_Exposed
ENSG00000100979	ENSG00000100979:1	PLTP	0.495	Heart_Atrial_Appendage
ENSG00000120262	ENSG00000120262:1	CCDC170	0.4948	Adipose_Visceral_Omentum
ENSG00000114127	ENSG00000114127:1	XRN1	0.4947	Cells_Cultured_fibroblasts
ENSG00000203896	ENSG00000203896:1	LIME1	0.4947	Artery_Coronary
ENSG00000164713	ENSG00000164713:2	BRI3	0.4944	Adipose_Subcutaneous
ENSG00000177311	ENSG00000177311:1	ZBTB38	0.4943	Breast_Mammary_Tissue
ENSG00000119878	ENSG00000119878:1	CRIPT	0.4942	Stomach
ENSG00000179598	ENSG00000179598:1	PLD6	0.4941	Lung
ENSG00000183426	ENSG00000183426:1	NPIPA1	0.4941	Heart_Atrial_Appendage
ENSG00000183793	ENSG00000183793:1	NPIPA5	0.4941	Heart_Atrial_Appendage
ENSG00000100991	ENSG00000100991:1	TRPC4AP	0.4938	Adipose_Subcutaneous
ENSG00000122778	ENSG00000122778:1	KIAA1549	0.4938	Adipose_Visceral_Omentum
ENSG00000100991	ENSG00000100991:2	TRPC4AP	0.4935	Colon_Sigmoid
ENSG00000132510	ENSG00000132510:1	KDM6B	0.4935	Nerve_Tibial
ENSG00000183426	ENSG00000183426:1	NPIPA1	0.4935	Brain_Hypothalamus
ENSG00000105287	ENSG00000105287:2	PRKD2	0.4934	Brain_Amygdala
ENSG00000144455	ENSG00000144455:2	SUMF1	0.4933	Breast_Mammary_Tissue
ENSG00000148737	ENSG00000148737:1	TCF7L2	0.4932	Cells_Cultured_fibroblasts
ENSG00000124257	ENSG00000124257:1	NEURL2	0.4929	Skin_Not_Sun_Exposed
ENSG00000100099	ENSG00000100099:1	HPS4	0.4927	Nerve_Tibial
ENSG00000118420	ENSG00000118420:1	UBE3D	0.4926	Lung
ENSG00000100099	ENSG00000100099:1	HPS4	0.4925	Pituitary
ENSG00000156103	ENSG00000156103:1	MMP16	0.4925	Esophagus_Mucosa
ENSG00000196937	ENSG00000196937:2	FAM3C	0.4917	Artery_Tibial
ENSG00000176125	ENSG00000176125:1	UFSP1	0.4916	Skin_Sun_Exposed
ENSG00000213853	ENSG00000213853:1	EMP2	0.4914	Artery_Coronary
ENSG00000183426	ENSG00000183426:1	NPIPA1	0.4912	Brain_Frontal_Cortex_BA9
ENSG00000002726	ENSG00000002726:1	AOC1	0.4909	Adipose_Visceral_Omentum
ENSG00000132510	ENSG00000132510:1	KDM6B	0.4908	Testis
ENSG00000178177	ENSG00000178177:1	LCORL	0.4908	Brain_Cerebellum
ENSG00000256525	ENSG00000256525:1	POLG2	0.4908	Brain_Amygdala
ENSG00000037474	ENSG00000037474:1	NSUN2	0.4905	Vagina
ENSG00000198961	ENSG00000198961:1	PJA2	0.4903	Pancreas
ENSG00000088888	ENSG00000088888:1	MAVS	0.4902	Skin_Sun_Exposed
ENSG00000180767	ENSG00000180767:1	CHST13	0.4901	Brain_Cortex
ENSG00000130702	ENSG00000130702:2	LAMA5	0.4899	Thyroid
ENSG00000125967	ENSG00000125967:1	NECAB3	0.4898	Pituitary
ENSG00000183793	ENSG00000183793:2	NPIPA5	0.4898	Brain_Frontal_Cortex_BA9
ENSG00000135127	ENSG00000135127:1	BICDL1	0.4896	Brain_Hypothalamus
ENSG00000183386	ENSG00000183386:1	FHL3	0.4895	Vagina
ENSG00000203896	ENSG00000203896:1	LIME1	0.4895	Pancreas
ENSG00000118200	ENSG00000118200:1	CAMSAP2	0.4891	Muscle_Skeletal
ENSG00000197548	ENSG00000197548:2	ATG7	0.4891	Esophagus_Mucosa
ENSG00000163349	ENSG00000163349:1	HIPK1	0.4887	Adipose_Subcutaneous
ENSG00000095777	ENSG00000095777:1	MYO3A	0.4881	Artery_Tibial
ENSG00000134222	ENSG00000134222:1	PSRC1	0.488	Testis
ENSG00000144810	ENSG00000144810:3	COL8A1	0.488	Muscle_Skeletal
ENSG00000243335	ENSG00000243335:2	KCTD7	0.488	Whole_Blood
ENSG00000120262	ENSG00000120262:1	CCDC170	0.4879	Breast_Mammary_Tissue
ENSG00000177311	ENSG00000177311:1	ZBTB38	0.4875	Esophagus_Gastroesophageal_Junction
ENSG00000136720	ENSG00000136720:1	HS6ST1	0.4871	Skin_Sun_Exposed
ENSG00000213853	ENSG00000213853:1	EMP2	0.4871	Stomach
ENSG00000078177	ENSG00000078177:2	N4BP2	0.4868	Colon_Transverse
ENSG00000184702	ENSG00000184702:1	SEPTIN5	0.4868	Skin_Sun_Exposed
ENSG00000100416	ENSG00000100416:1	TRMU	0.4867	Muscle_Skeletal
ENSG00000176125	ENSG00000176125:1	UFSP1	0.4864	Nerve_Tibial
ENSG00000037474	ENSG00000037474:1	NSUN2	0.4863	Breast_Mammary_Tissue
ENSG00000180767	ENSG00000180767:1	CHST13	0.4863	Pancreas
ENSG00000105655	ENSG00000105655:1	ISYNA1	0.4861	Heart_Left_Ventricle
ENSG00000107185	ENSG00000107185:1	RGP1	0.4861	Brain_Hippocampus
ENSG00000146828	ENSG00000146828:2	SLC12A9	0.4858	Colon_Sigmoid
ENSG00000151233	ENSG00000151233:2	GXYLT1	0.4858	Adipose_Visceral_Omentum
ENSG00000100982	ENSG00000100982:1	PCIF1	0.485	Whole_Blood
ENSG00000174611	ENSG00000174611:1	KY	0.4848	Lung
ENSG00000183426	ENSG00000183426:1	NPIPA1	0.4848	Brain_Putamen_basal_ganglia
ENSG00000183793	ENSG00000183793:1	NPIPA5	0.4848	Brain_Putamen_basal_ganglia
ENSG00000244045	ENSG00000244045:1	TMEM199	0.4845	Adrenal_Gland
ENSG00000163528	ENSG00000163528:2	CHCHD4	0.4842	Cells_Cultured_fibroblasts
ENSG00000113319	ENSG00000113319:1	RASGRF2	0.4839	Muscle_Skeletal
ENSG00000186501	ENSG00000186501:2	TMEM222	0.4837	Esophagus_Muscularis
ENSG00000244045	ENSG00000244045:1	TMEM199	0.4837	Lung
ENSG00000124257	ENSG00000124257:1	NEURL2	0.4834	Thyroid
ENSG00000117410	ENSG00000117410:1	ATP6V0B	0.4833	Whole_Blood
ENSG00000185885	ENSG00000185885:1	IFITM1	0.4831	Ovary
ENSG00000131055	ENSG00000131055:1	COX4I2	0.483	Brain_Hypothalamus
ENSG00000111860	ENSG00000111860:1	CEP85L	0.4828	Liver
ENSG00000131055	ENSG00000131055:1	COX4I2	0.4828	Brain_Nucleus_accumbens_basal_ganglia
ENSG00000183426	ENSG00000183426:1	NPIPA1	0.4825	Thyroid
ENSG00000183793	ENSG00000183793:1	NPIPA5	0.4825	Thyroid
ENSG00000128294	ENSG00000128294:1	TPST2	0.4824	Cells_Cultured_fibroblasts
ENSG00000171467	ENSG00000171467:2	ZNF318	0.4821	Esophagus_Mucosa
ENSG00000160838	ENSG00000160838:1	LRRC71	0.482	Esophagus_Mucosa
ENSG00000074755	ENSG00000074755:1	ZZEF1	0.4815	Heart_Atrial_Appendage
ENSG00000151233	ENSG00000151233:1	GXYLT1	0.4815	Breast_Mammary_Tissue
ENSG00000100979	ENSG00000100979:1	PLTP	0.4813	Heart_Left_Ventricle
ENSG00000139668	ENSG00000139668:1	WDFY2	0.4813	Adipose_Visceral_Omentum
ENSG00000183426	ENSG00000183426:1	NPIPA1	0.4807	Brain_Caudate_basal_ganglia
ENSG00000183793	ENSG00000183793:1	NPIPA5	0.4807	Brain_Caudate_basal_ganglia
ENSG00000165487	ENSG00000165487:2	MICU2	0.4805	Pancreas
ENSG00000151090	ENSG00000151090:1	THRB	0.4795	Heart_Left_Ventricle
ENSG00000184949	ENSG00000184949:1	FAM227A	0.4795	Esophagus_Gastroesophageal_Junction
ENSG00000119878	ENSG00000119878:1	CRIPT	0.4792	Minor_Salivary_Gland
ENSG00000141030	ENSG00000141030:1	COPS3	0.4792	Artery_Tibial
ENSG00000128203	ENSG00000128203:1	ASPHD2	0.4788	Whole_Blood
ENSG00000170606	ENSG00000170606:2	HSPA4	0.4787	Esophagus_Mucosa
ENSG00000108654	ENSG00000108654:1	DDX5	0.4785	Brain_Caudate_basal_ganglia
ENSG00000128203	ENSG00000128203:1	ASPHD2	0.4774	Cells_Cultured_fibroblasts
ENSG00000135835	ENSG00000135835:1	KIAA1614	0.4774	Brain_Caudate_basal_ganglia
ENSG00000178665	ENSG00000178665:2	ZNF713	0.477	Breast_Mammary_Tissue
ENSG00000244045	ENSG00000244045:1	TMEM199	0.4768	Artery_Aorta
ENSG00000119878	ENSG00000119878:1	CRIPT	0.4766	Nerve_Tibial
ENSG00000151135	ENSG00000151135:1	TMEM263	0.4765	Muscle_Skeletal
ENSG00000165895	ENSG00000165895:1	ARHGAP42	0.4765	Adipose_Subcutaneous
ENSG00000109193	ENSG00000109193:1	SULT1E1	0.4761	Skin_Not_Sun_Exposed
ENSG00000144455	ENSG00000144455:2	SUMF1	0.476	Artery_Tibial
ENSG00000088888	ENSG00000088888:1	MAVS	0.4758	Nerve_Tibial
ENSG00000075223	ENSG00000075223:1	SEMA3C	0.4755	Cells_Cultured_fibroblasts
ENSG00000156103	ENSG00000156103:1	MMP16	0.4754	Adipose_Visceral_Omentum
ENSG00000109654	ENSG00000109654:3	TRIM2	0.475	Nerve_Tibial
ENSG00000100991	ENSG00000100991:1	TRPC4AP	0.4748	Adipose_Visceral_Omentum
ENSG00000004139	ENSG00000004139:1	SARM1	0.4742	Adipose_Subcutaneous
ENSG00000162623	ENSG00000162623:1	TYW3	0.4742	Muscle_Skeletal
ENSG00000180767	ENSG00000180767:1	CHST13	0.4741	Brain_Anterior_cingulate_cortex_BA24
ENSG00000043093	ENSG00000043093:1	DCUN1D1	0.474	Cells_Cultured_fibroblasts
ENSG00000100985	ENSG00000100985:1	MMP9	0.474	Skin_Not_Sun_Exposed
ENSG00000119878	ENSG00000119878:1	CRIPT	0.474	Brain_Anterior_cingulate_cortex_BA24
ENSG00000163528	ENSG00000163528:1	CHCHD4	0.4734	Ovary
ENSG00000037474	ENSG00000037474:1	NSUN2	0.4729	Colon_Transverse
ENSG00000082641	ENSG00000082641:1	NFE2L1	0.4727	Muscle_Skeletal
ENSG00000079277	ENSG00000079277:1	MKNK1	0.4726	Spleen
ENSG00000167637	ENSG00000167637:2	ZNF283	0.4724	Skin_Sun_Exposed
ENSG00000151233	ENSG00000151233:1	GXYLT1	0.4723	Artery_Aorta
ENSG00000164889	ENSG00000164889:1	SLC4A2	0.4721	Pancreas
ENSG00000177051	ENSG00000177051:1	FBXO46	0.4721	Esophagus_Muscularis
ENSG00000138152	ENSG00000138152:1	BTBD16	0.4716	Brain_Caudate_basal_ganglia
ENSG00000105643	ENSG00000105643:1	ARRDC2	0.4715	Skin_Sun_Exposed
ENSG00000213889	ENSG00000213889:2	PPM1N	0.4712	Cells_Cultured_fibroblasts
ENSG00000144455	ENSG00000144455:2	SUMF1	0.4702	Cells_Cultured_fibroblasts
ENSG00000131055	ENSG00000131055:1	COX4I2	0.4701	Colon_Transverse
ENSG00000183793	ENSG00000183793:1	NPIPA5	0.4698	Brain_Substantia_nigra
ENSG00000183426	ENSG00000183426:1	NPIPA1	0.4697	Brain_Substantia_nigra
ENSG00000198523	ENSG00000198523:1	PLN	0.4694	Artery_Aorta
ENSG00000183426	ENSG00000183426:1	NPIPA1	0.4693	Brain_Anterior_cingulate_cortex_BA24
ENSG00000183793	ENSG00000183793:1	NPIPA5	0.4692	Brain_Anterior_cingulate_cortex_BA24
ENSG00000156535	ENSG00000156535:1	CD109	0.469	Spleen
ENSG00000099785	ENSG00000099785:1	MARCHF2	0.4689	Vagina
ENSG00000176125	ENSG00000176125:1	UFSP1	0.4688	Esophagus_Mucosa
ENSG00000120262	ENSG00000120262:1	CCDC170	0.4687	Thyroid
ENSG00000144455	ENSG00000144455:2	SUMF1	0.4686	Lung
ENSG00000183426	ENSG00000183426:1	NPIPA1	0.4686	Brain_Nucleus_accumbens_basal_ganglia
ENSG00000183793	ENSG00000183793:1	NPIPA5	0.4686	Brain_Nucleus_accumbens_basal_ganglia
ENSG00000183426	ENSG00000183426:1	NPIPA1	0.4685	Brain_Hippocampus
ENSG00000113319	ENSG00000113319:2	RASGRF2	0.4683	Spleen
ENSG00000099785	ENSG00000099785:1	MARCHF2	0.4681	Liver
ENSG00000083857	ENSG00000083857:1	FAT1	0.4667	Nerve_Tibial
ENSG00000100991	ENSG00000100991:4	TRPC4AP	0.4666	Lung
ENSG00000105287	ENSG00000105287:2	PRKD2	0.4666	Liver
ENSG00000139567	ENSG00000139567:1	ACVRL1	0.4666	Lung
ENSG00000125520	ENSG00000125520:1	SLC2A4RG	0.4665	Lung
ENSG00000279170	ENSG00000279170:2	TSTD3	0.4665	Brain_Cerebellum
ENSG00000170464	ENSG00000170464:1	DNAJC18	0.4663	Artery_Tibial
ENSG00000140320	ENSG00000140320:1	BAHD1	0.4661	Lung
ENSG00000280165	ENSG00000280165:1	PCDH20	0.4661	Skin_Sun_Exposed
ENSG00000185885	ENSG00000185885:1	IFITM1	0.4659	Adipose_Visceral_Omentum
ENSG00000244045	ENSG00000244045:1	TMEM199	0.4659	Esophagus_Muscularis
ENSG00000125378	ENSG00000125378:1	BMP4	0.4657	Testis
ENSG00000019144	ENSG00000019144:1	PHLDB1	0.4655	Pituitary
ENSG00000151233	ENSG00000151233:1	GXYLT1	0.4655	Muscle_Skeletal
ENSG00000170464	ENSG00000170464:1	DNAJC18	0.4651	Adipose_Visceral_Omentum
ENSG00000037474	ENSG00000037474:1	NSUN2	0.4649	Brain_Hypothalamus
ENSG00000140577	ENSG00000140577:1	CRTC3	0.4641	Whole_Blood
ENSG00000170606	ENSG00000170606:1	HSPA4	0.4641	Brain_Cortex
ENSG00000170852	ENSG00000170852:1	KBTBD2	0.4638	Skin_Not_Sun_Exposed
ENSG00000141030	ENSG00000141030:1	COPS3	0.4635	Spleen
ENSG00000176125	ENSG00000176125:1	UFSP1	0.4633	Brain_Amygdala
ENSG00000244045	ENSG00000244045:1	TMEM199	0.4633	Whole_Blood
ENSG00000183386	ENSG00000183386:1	FHL3	0.4625	Artery_Coronary
ENSG00000244045	ENSG00000244045:1	TMEM199	0.4624	Skin_Not_Sun_Exposed
ENSG00000115825	ENSG00000115825:2	PRKD3	0.4618	Whole_Blood
ENSG00000180767	ENSG00000180767:1	CHST13	0.4615	Brain_Hippocampus
ENSG00000127022	ENSG00000127022:2	CANX	0.4612	Skin_Sun_Exposed
ENSG00000084674	ENSG00000084674:1	APOB	0.4606	Artery_Tibial
ENSG00000088448	ENSG00000088448:1	ANKRD10	0.4605	Brain_Caudate_basal_ganglia
ENSG00000180767	ENSG00000180767:1	CHST13	0.4605	Ovary
ENSG00000184702	ENSG00000184702:1	SEPTIN5	0.4604	Adipose_Subcutaneous
ENSG00000088888	ENSG00000088888:3	MAVS	0.4603	Whole_Blood
ENSG00000170464	ENSG00000170464:1	DNAJC18	0.4603	Cells_Cultured_fibroblasts
ENSG00000088888	ENSG00000088888:1	MAVS	0.4601	Colon_Transverse
ENSG00000128294	ENSG00000128294:1	TPST2	0.46	Esophagus_Mucosa
ENSG00000026508	ENSG00000026508:1	CD44	0.4596	Adipose_Subcutaneous
ENSG00000151665	ENSG00000151665:1	PIGF	0.459	Heart_Left_Ventricle
ENSG00000138152	ENSG00000138152:1	BTBD16	0.4585	Kidney_Cortex
ENSG00000141030	ENSG00000141030:1	COPS3	0.4581	Brain_Cortex
ENSG00000170464	ENSG00000170464:1	DNAJC18	0.4581	Whole_Blood
ENSG00000119878	ENSG00000119878:1	CRIPT	0.4579	Uterus
ENSG00000143801	ENSG00000143801:1	PSEN2	0.4577	Spleen
ENSG00000174611	ENSG00000174611:1	KY	0.4576	Artery_Aorta
ENSG00000177311	ENSG00000177311:1	ZBTB38	0.4576	Whole_Blood
ENSG00000168612	ENSG00000168612:1	ZSWIM1	0.4575	Adipose_Visceral_Omentum
ENSG00000205356	ENSG00000205356:1	TECPR1	0.4574	Skin_Not_Sun_Exposed
ENSG00000198961	ENSG00000198961:1	PJA2	0.4573	Artery_Tibial
ENSG00000143801	ENSG00000143801:1	PSEN2	0.4571	Brain_Caudate_basal_ganglia
ENSG00000177311	ENSG00000177311:1	ZBTB38	0.457	Adipose_Subcutaneous
ENSG00000115648	ENSG00000115648:1	MLPH	0.4568	Prostate
ENSG00000002726	ENSG00000002726:1	AOC1	0.4566	Artery_Aorta
ENSG00000100991	ENSG00000100991:3	TRPC4AP	0.4561	Nerve_Tibial
ENSG00000011028	ENSG00000011028:1	MRC2	0.4557	Breast_Mammary_Tissue
ENSG00000171488	ENSG00000171488:1	LRRC8C	0.4555	Heart_Left_Ventricle
ENSG00000244045	ENSG00000244045:1	TMEM199	0.4549	Esophagus_Mucosa
ENSG00000156103	ENSG00000156103:1	MMP16	0.4546	Pituitary
ENSG00000163249	ENSG00000163249:1	CCNYL1	0.4545	Adipose_Subcutaneous
ENSG00000181027	ENSG00000181027:2	FKRP	0.4544	Esophagus_Mucosa
ENSG00000151233	ENSG00000151233:1	GXYLT1	0.4543	Artery_Tibial
ENSG00000158417	ENSG00000158417:1	EIF5B	0.4543	Cells_Cultured_fibroblasts
ENSG00000170464	ENSG00000170464:1	DNAJC18	0.4543	Muscle_Skeletal
ENSG00000100991	ENSG00000100991:1	TRPC4AP	0.4541	Liver
ENSG00000157036	ENSG00000157036:1	EXOG	0.4537	Adipose_Visceral_Omentum
ENSG00000105287	ENSG00000105287:1	PRKD2	0.4536	Thyroid
ENSG00000185885	ENSG00000185885:1	IFITM1	0.4536	Vagina
ENSG00000124508	ENSG00000124508:1	BTN2A2	0.4535	Whole_Blood
ENSG00000131055	ENSG00000131055:1	COX4I2	0.4533	Ovary
ENSG00000177311	ENSG00000177311:1	ZBTB38	0.453	Spleen
ENSG00000079277	ENSG00000079277:1	MKNK1	0.4523	Cells_Cultured_fibroblasts
ENSG00000144455	ENSG00000144455:1	SUMF1	0.4523	Testis
ENSG00000187583	ENSG00000187583:2	PLEKHN1	0.4521	Nerve_Tibial
ENSG00000019144	ENSG00000019144:1	PHLDB1	0.4519	Brain_Cerebellum
ENSG00000119878	ENSG00000119878:1	CRIPT	0.4518	Heart_Left_Ventricle
ENSG00000164440	ENSG00000164440:1	TXLNB	0.4518	Colon_Sigmoid
ENSG00000128203	ENSG00000128203:1	ASPHD2	0.4516	Vagina
ENSG00000148498	ENSG00000148498:1	PARD3	0.4516	Nerve_Tibial
ENSG00000054965	ENSG00000054965:1	FAM168A	0.4515	Testis
ENSG00000170464	ENSG00000170464:1	DNAJC18	0.4515	Artery_Aorta
ENSG00000088888	ENSG00000088888:1	MAVS	0.4514	Breast_Mammary_Tissue
ENSG00000117410	ENSG00000117410:2	ATP6V0B	0.4514	Pancreas
ENSG00000170606	ENSG00000170606:1	HSPA4	0.4514	Brain_Amygdala
ENSG00000170464	ENSG00000170464:1	DNAJC18	0.4512	Breast_Mammary_Tissue
ENSG00000113389	ENSG00000113389:1	NPR3	0.4511	Testis
ENSG00000140320	ENSG00000140320:1	BAHD1	0.4511	Artery_Tibial
ENSG00000170464	ENSG00000170464:1	DNAJC18	0.451	Colon_Sigmoid
ENSG00000141030	ENSG00000141030:1	COPS3	0.4507	Esophagus_Muscularis
ENSG00000198478	ENSG00000198478:1	SH3BGRL2	0.4506	Brain_Anterior_cingulate_cortex_BA24
ENSG00000184702	ENSG00000184702:1	SEPTIN5	0.4505	Skin_Not_Sun_Exposed
ENSG00000100991	ENSG00000100991:2	TRPC4AP	0.4503	Spleen
ENSG00000144455	ENSG00000144455:2	SUMF1	0.4503	Adipose_Subcutaneous
ENSG00000176125	ENSG00000176125:1	UFSP1	0.4502	Colon_Transverse
ENSG00000185651	ENSG00000185651:1	UBE2L3	0.45	Whole_Blood
ENSG00000100099	ENSG00000100099:1	HPS4	0.4499	Brain_Amygdala
ENSG00000157036	ENSG00000157036:1	EXOG	0.4498	Breast_Mammary_Tissue
ENSG00000111802	ENSG00000111802:2	TDP2	0.4497	Pituitary
ENSG00000161180	ENSG00000161180:1	CCDC116	0.4497	Artery_Aorta
ENSG00000134222	ENSG00000134222:2	PSRC1	0.4496	Lung
ENSG00000142961	ENSG00000142961:1	MOB3C	0.4495	Pituitary
ENSG00000213853	ENSG00000213853:1	EMP2	0.4494	Minor_Salivary_Gland
ENSG00000151233	ENSG00000151233:1	GXYLT1	0.4492	Prostate
ENSG00000163956	ENSG00000163956:2	LRPAP1	0.4491	Brain_Cortex
ENSG00000166598	ENSG00000166598:1	HSP90B1	0.4491	Heart_Left_Ventricle
ENSG00000163050	ENSG00000163050:1	COQ8A	0.4488	Brain_Cortex
ENSG00000087077	ENSG00000087077:1	TRIP6	0.4483	Cells_Cultured_fibroblasts
ENSG00000160469	ENSG00000160469:2	BRSK1	0.4473	Adrenal_Gland
ENSG00000079277	ENSG00000079277:1	MKNK1	0.4472	Brain_Anterior_cingulate_cortex_BA24
ENSG00000198961	ENSG00000198961:1	PJA2	0.4471	Whole_Blood
ENSG00000149634	ENSG00000149634:2	SPATA25	0.4469	Nerve_Tibial
ENSG00000170464	ENSG00000170464:1	DNAJC18	0.4469	Stomach
ENSG00000114573	ENSG00000114573:1	ATP6V1A	0.4468	Pituitary
ENSG00000161180	ENSG00000161180:1	CCDC116	0.4467	Colon_Transverse
ENSG00000165730	ENSG00000165730:1	STOX1	0.4465	Adipose_Visceral_Omentum
ENSG00000244045	ENSG00000244045:1	TMEM199	0.4463	Brain_Spinal_cord_cervical_c-1
ENSG00000088888	ENSG00000088888:2	MAVS	0.4461	Pancreas
ENSG00000186501	ENSG00000186501:2	TMEM222	0.4461	Artery_Tibial
ENSG00000174945	ENSG00000174945:2	AMZ1	0.4457	Brain_Cerebellar_Hemisphere
ENSG00000105287	ENSG00000105287:1	PRKD2	0.4456	Prostate
ENSG00000146215	ENSG00000146215:1	CRIP3	0.4453	Heart_Left_Ventricle
ENSG00000172260	ENSG00000172260:1	NEGR1	0.4452	Lung
ENSG00000176125	ENSG00000176125:1	UFSP1	0.4449	Colon_Sigmoid
ENSG00000100991	ENSG00000100991:1	TRPC4AP	0.4448	Thyroid
ENSG00000100994	ENSG00000100994:3	PYGB	0.4448	Nerve_Tibial
ENSG00000176125	ENSG00000176125:1	UFSP1	0.4446	Skin_Not_Sun_Exposed
ENSG00000075413	ENSG00000075413:1	MARK3	0.4442	Pancreas
ENSG00000161180	ENSG00000161180:1	CCDC116	0.4439	Esophagus_Gastroesophageal_Junction
ENSG00000163050	ENSG00000163050:1	COQ8A	0.4438	Esophagus_Gastroesophageal_Junction
ENSG00000178665	ENSG00000178665:1	ZNF713	0.4437	Brain_Hippocampus
ENSG00000184702	ENSG00000184702:2	SEPTIN5	0.4428	Adipose_Visceral_Omentum
ENSG00000006210	ENSG00000006210:1	CX3CL1	0.4427	Adrenal_Gland
ENSG00000213949	ENSG00000213949:1	ITGA1	0.4424	Prostate
ENSG00000189067	ENSG00000189067:2	LITAF	0.4423	Colon_Transverse
ENSG00000137449	ENSG00000137449:1	CPEB2	0.4422	Esophagus_Mucosa
ENSG00000198026	ENSG00000198026:1	ZNF335	0.4421	Skin_Not_Sun_Exposed
ENSG00000163956	ENSG00000163956:2	LRPAP1	0.4419	Brain_Frontal_Cortex_BA9
ENSG00000213853	ENSG00000213853:1	EMP2	0.4418	Esophagus_Muscularis
ENSG00000095777	ENSG00000095777:2	MYO3A	0.4415	Breast_Mammary_Tissue
ENSG00000161180	ENSG00000161180:1	CCDC116	0.4412	Adipose_Subcutaneous
ENSG00000071967	ENSG00000071967:1	CYBRD1	0.4409	Heart_Left_Ventricle
ENSG00000103966	ENSG00000103966:1	EHD4	0.4409	Colon_Transverse
ENSG00000161180	ENSG00000161180:1	CCDC116	0.4407	Artery_Tibial
ENSG00000128294	ENSG00000128294:1	TPST2	0.4405	Muscle_Skeletal
ENSG00000146215	ENSG00000146215:1	CRIP3	0.4401	Liver
ENSG00000135127	ENSG00000135127:1	BICDL1	0.44	Whole_Blood
ENSG00000183011	ENSG00000183011:1	NAA38	0.44	Brain_Cerebellar_Hemisphere
ENSG00000088888	ENSG00000088888:1	MAVS	0.4396	Colon_Sigmoid
ENSG00000114573	ENSG00000114573:1	ATP6V1A	0.4396	Breast_Mammary_Tissue
ENSG00000143494	ENSG00000143494:1	VASH2	0.4396	Lung
ENSG00000119878	ENSG00000119878:1	CRIPT	0.4391	Testis
ENSG00000075413	ENSG00000075413:1	MARK3	0.439	Breast_Mammary_Tissue
ENSG00000203896	ENSG00000203896:1	LIME1	0.439	Testis
ENSG00000172260	ENSG00000172260:2	NEGR1	0.4389	Nerve_Tibial
ENSG00000037474	ENSG00000037474:1	NSUN2	0.4387	Brain_Anterior_cingulate_cortex_BA24
ENSG00000170464	ENSG00000170464:1	DNAJC18	0.4384	Spleen
ENSG00000011028	ENSG00000011028:2	MRC2	0.438	Cells_Cultured_fibroblasts
ENSG00000280165	ENSG00000280165:1	PCDH20	0.4378	Nerve_Tibial
ENSG00000074696	ENSG00000074696:1	HACD3	0.4376	Whole_Blood
ENSG00000114491	ENSG00000114491:1	UMPS	0.4373	Muscle_Skeletal
ENSG00000135127	ENSG00000135127:1	BICDL1	0.4373	Brain_Caudate_basal_ganglia
ENSG00000135127	ENSG00000135127:1	BICDL1	0.4372	Brain_Hippocampus
ENSG00000122778	ENSG00000122778:1	KIAA1549	0.437	Pituitary
ENSG00000169836	ENSG00000169836:1	TACR3	0.4362	Brain_Frontal_Cortex_BA9
ENSG00000151233	ENSG00000151233:1	GXYLT1	0.4359	Stomach
ENSG00000114573	ENSG00000114573:1	ATP6V1A	0.4355	Muscle_Skeletal
ENSG00000156103	ENSG00000156103:1	MMP16	0.4354	Adipose_Subcutaneous
ENSG00000170876	ENSG00000170876:1	TMEM43	0.4354	Brain_Caudate_basal_ganglia
ENSG00000079819	ENSG00000079819:1	EPB41L2	0.4353	Esophagus_Muscularis
ENSG00000143515	ENSG00000143515:1	ATP8B2	0.4352	Muscle_Skeletal
ENSG00000169836	ENSG00000169836:1	TACR3	0.4346	Kidney_Cortex
ENSG00000139668	ENSG00000139668:1	WDFY2	0.4344	Brain_Hippocampus
ENSG00000170464	ENSG00000170464:1	DNAJC18	0.4336	Pancreas
ENSG00000149634	ENSG00000149634:1	SPATA25	0.4334	Adipose_Visceral_Omentum
ENSG00000152767	ENSG00000152767:2	FARP1	0.4332	Colon_Transverse
ENSG00000185885	ENSG00000185885:1	IFITM1	0.4332	Pancreas
ENSG00000108654	ENSG00000108654:1	DDX5	0.4331	Brain_Cerebellum
ENSG00000037474	ENSG00000037474:1	NSUN2	0.4329	Brain_Spinal_cord_cervical_c-1
ENSG00000157036	ENSG00000157036:1	EXOG	0.4327	Brain_Amygdala
ENSG00000261236	ENSG00000261236:1	BOP1	0.4324	Liver
ENSG00000037474	ENSG00000037474:1	NSUN2	0.4323	Prostate
ENSG00000071967	ENSG00000071967:1	CYBRD1	0.4316	Esophagus_Muscularis
ENSG00000157036	ENSG00000157036:1	EXOG	0.4314	Colon_Transverse
ENSG00000166250	ENSG00000166250:1	CLMP	0.4314	Cells_Cultured_fibroblasts
ENSG00000011028	ENSG00000011028:1	MRC2	0.4313	Testis
ENSG00000158865	ENSG00000158865:1	SLC5A11	0.4313	Testis
ENSG00000170464	ENSG00000170464:1	DNAJC18	0.4312	Minor_Salivary_Gland
ENSG00000088448	ENSG00000088448:3	ANKRD10	0.431	Whole_Blood
ENSG00000166822	ENSG00000166822:1	TMEM170A	0.431	Thyroid
ENSG00000087077	ENSG00000087077:1	TRIP6	0.4308	Lung
ENSG00000107669	ENSG00000107669:2	ATE1	0.4308	Artery_Tibial
ENSG00000103742	ENSG00000103742:1	IGDCC4	0.4305	Brain_Putamen_basal_ganglia
ENSG00000244045	ENSG00000244045:1	TMEM199	0.4302	Spleen
ENSG00000089177	ENSG00000089177:4	KIF16B	0.4296	Whole_Blood
ENSG00000187961	ENSG00000187961:1	KLHL17	0.4296	Muscle_Skeletal
ENSG00000176125	ENSG00000176125:1	UFSP1	0.4294	Artery_Tibial
ENSG00000204644	ENSG00000204644:2	ZFP57	0.4294	Heart_Left_Ventricle
ENSG00000131055	ENSG00000131055:1	COX4I2	0.4291	Pancreas
ENSG00000244045	ENSG00000244045:1	TMEM199	0.429	Colon_Sigmoid
ENSG00000095777	ENSG00000095777:2	MYO3A	0.4287	Skin_Not_Sun_Exposed
ENSG00000119878	ENSG00000119878:1	CRIPT	0.4286	Adipose_Visceral_Omentum
ENSG00000037474	ENSG00000037474:1	NSUN2	0.4282	Brain_Caudate_basal_ganglia
ENSG00000140320	ENSG00000140320:1	BAHD1	0.4282	Prostate
ENSG00000151135	ENSG00000151135:1	TMEM263	0.4282	Artery_Aorta
ENSG00000260428	ENSG00000260428:1	SCX	0.4281	Adrenal_Gland
ENSG00000070018	ENSG00000070018:2	LRP6	0.4276	Cells_Cultured_fibroblasts
ENSG00000100979	ENSG00000100979:2	PLTP	0.4276	Stomach
ENSG00000157036	ENSG00000157036:1	EXOG	0.4275	Heart_Left_Ventricle
ENSG00000180767	ENSG00000180767:1	CHST13	0.4273	Brain_Putamen_basal_ganglia
ENSG00000196337	ENSG00000196337:1	CGB7	0.4273	Brain_Cortex
ENSG00000140577	ENSG00000140577:1	CRTC3	0.4272	Skin_Not_Sun_Exposed
ENSG00000163956	ENSG00000163956:1	LRPAP1	0.427	Brain_Anterior_cingulate_cortex_BA24
ENSG00000101412	ENSG00000101412:1	E2F1	0.4269	Brain_Substantia_nigra
ENSG00000026508	ENSG00000026508:1	CD44	0.4267	Muscle_Skeletal
ENSG00000143801	ENSG00000143801:1	PSEN2	0.4265	Pituitary
ENSG00000205356	ENSG00000205356:1	TECPR1	0.4265	Skin_Sun_Exposed
ENSG00000170917	ENSG00000170917:2	NUDT6	0.4264	Pituitary
ENSG00000103335	ENSG00000103335:2	PIEZO1	0.4256	Lung
ENSG00000114573	ENSG00000114573:1	ATP6V1A	0.4256	Esophagus_Gastroesophageal_Junction
ENSG00000100991	ENSG00000100991:2	TRPC4AP	0.4255	Esophagus_Gastroesophageal_Junction
ENSG00000125378	ENSG00000125378:1	BMP4	0.4253	Thyroid
ENSG00000011028	ENSG00000011028:1	MRC2	0.4252	Stomach
ENSG00000168769	ENSG00000168769:1	TET2	0.4249	Adipose_Visceral_Omentum
ENSG00000156103	ENSG00000156103:1	MMP16	0.4248	Pancreas
ENSG00000135127	ENSG00000135127:1	BICDL1	0.4247	Brain_Cerebellum
ENSG00000136930	ENSG00000136930:1	PSMB7	0.4246	Brain_Cerebellum
ENSG00000142961	ENSG00000142961:1	MOB3C	0.4244	Lung
ENSG00000168769	ENSG00000168769:1	TET2	0.4241	Skin_Not_Sun_Exposed
ENSG00000170464	ENSG00000170464:1	DNAJC18	0.424	Liver
ENSG00000134982	ENSG00000134982:1	APC	0.4237	Adrenal_Gland
ENSG00000170464	ENSG00000170464:1	DNAJC18	0.4236	Skin_Not_Sun_Exposed
ENSG00000140320	ENSG00000140320:1	BAHD1	0.4235	Stomach
ENSG00000165730	ENSG00000165730:1	STOX1	0.4235	Adipose_Subcutaneous
ENSG00000037474	ENSG00000037474:1	NSUN2	0.4233	Spleen
ENSG00000157036	ENSG00000157036:1	EXOG	0.4229	Vagina
ENSG00000122008	ENSG00000122008:1	POLK	0.4228	Liver
ENSG00000151233	ENSG00000151233:1	GXYLT1	0.4228	Pancreas
ENSG00000100991	ENSG00000100991:2	TRPC4AP	0.4226	Pancreas
ENSG00000170464	ENSG00000170464:1	DNAJC18	0.4225	Esophagus_Gastroesophageal_Junction
ENSG00000064989	ENSG00000064989:1	CALCRL	0.4224	Adipose_Subcutaneous
ENSG00000166452	ENSG00000166452:1	AKIP1	0.422	Brain_Putamen_basal_ganglia
ENSG00000151233	ENSG00000151233:1	GXYLT1	0.4217	Colon_Transverse
ENSG00000169609	ENSG00000169609:2	C15orf40	0.4214	Liver
ENSG00000156103	ENSG00000156103:1	MMP16	0.4211	Heart_Left_Ventricle
ENSG00000232629	ENSG00000232629:2	HLA-DQB2	0.4206	Stomach
ENSG00000254852	ENSG00000254852:1	NPIPA2	0.4206	Esophagus_Gastroesophageal_Junction
ENSG00000037474	ENSG00000037474:1	NSUN2	0.4201	Adipose_Visceral_Omentum
ENSG00000157036	ENSG00000157036:1	EXOG	0.4199	Whole_Blood
ENSG00000183426	ENSG00000183426:1	NPIPA1	0.4199	Brain_Cerebellum
ENSG00000179598	ENSG00000179598:1	PLD6	0.4198	Brain_Cerebellum
ENSG00000139668	ENSG00000139668:1	WDFY2	0.4197	Brain_Cerebellum
ENSG00000183793	ENSG00000183793:1	NPIPA5	0.4197	Brain_Cerebellum
ENSG00000119878	ENSG00000119878:1	CRIPT	0.4193	Thyroid
ENSG00000180767	ENSG00000180767:1	CHST13	0.4193	Brain_Spinal_cord_cervical_c-1
ENSG00000011028	ENSG00000011028:1	MRC2	0.4192	Esophagus_Gastroesophageal_Junction
ENSG00000179133	ENSG00000179133:1	C10orf67	0.4192	Skin_Not_Sun_Exposed
ENSG00000183426	ENSG00000183426:1	NPIPA1	0.4187	Brain_Cerebellar_Hemisphere
ENSG00000244754	ENSG00000244754:1	N4BP2L2	0.4187	Artery_Aorta
ENSG00000168828	ENSG00000168828:1	OR13J1	0.4186	Heart_Left_Ventricle
ENSG00000120693	ENSG00000120693:3	SMAD9	0.4184	Cells_Cultured_fibroblasts
ENSG00000170464	ENSG00000170464:1	DNAJC18	0.4184	Colon_Transverse
ENSG00000004142	ENSG00000004142:1	POLDIP2	0.4183	Adrenal_Gland
ENSG00000142961	ENSG00000142961:1	MOB3C	0.4182	Small_Intestine_Terminal_Ileum
ENSG00000160256	ENSG00000160256:2	FAM207A	0.4181	Skin_Sun_Exposed
ENSG00000109193	ENSG00000109193:1	SULT1E1	0.4178	Esophagus_Mucosa
ENSG00000146242	ENSG00000146242:1	TPBG	0.4178	Liver
ENSG00000066248	ENSG00000066248:1	NGEF	0.4177	Brain_Hypothalamus
ENSG00000170464	ENSG00000170464:1	DNAJC18	0.4177	Esophagus_Muscularis
ENSG00000140320	ENSG00000140320:1	BAHD1	0.4175	Nerve_Tibial
ENSG00000115825	ENSG00000115825:3	PRKD3	0.4174	Artery_Aorta
ENSG00000138678	ENSG00000138678:1	GPAT3	0.4174	Brain_Nucleus_accumbens_basal_ganglia
ENSG00000154803	ENSG00000154803:1	FLCN	0.4171	Brain_Spinal_cord_cervical_c-1
ENSG00000183793	ENSG00000183793:1	NPIPA5	0.4171	Brain_Cerebellar_Hemisphere
ENSG00000172985	ENSG00000172985:1	SH3RF3	0.417	Esophagus_Mucosa
ENSG00000188897	ENSG00000188897:1	AC099489.1	0.4164	Esophagus_Mucosa
ENSG00000137098	ENSG00000137098:1	SPAG8	0.4163	Skin_Sun_Exposed
ENSG00000037474	ENSG00000037474:1	NSUN2	0.4162	Heart_Left_Ventricle
ENSG00000119878	ENSG00000119878:1	CRIPT	0.4162	Colon_Transverse
ENSG00000088448	ENSG00000088448:1	ANKRD10	0.4155	Heart_Atrial_Appendage
ENSG00000170464	ENSG00000170464:1	DNAJC18	0.4153	Lung
ENSG00000122008	ENSG00000122008:1	POLK	0.4147	Skin_Not_Sun_Exposed
ENSG00000101144	ENSG00000101144:1	BMP7	0.4146	Nerve_Tibial
ENSG00000170260	ENSG00000170260:2	ZNF212	0.4146	Colon_Transverse
ENSG00000079277	ENSG00000079277:1	MKNK1	0.4141	Liver
ENSG00000205356	ENSG00000205356:1	TECPR1	0.4139	Testis
ENSG00000004142	ENSG00000004142:1	POLDIP2	0.4138	Brain_Amygdala
ENSG00000169228	ENSG00000169228:1	RAB24	0.4138	Minor_Salivary_Gland
ENSG00000100982	ENSG00000100982:1	PCIF1	0.4137	Adrenal_Gland
ENSG00000144455	ENSG00000144455:2	SUMF1	0.4136	Esophagus_Mucosa
ENSG00000244045	ENSG00000244045:1	TMEM199	0.4134	Brain_Amygdala
ENSG00000165730	ENSG00000165730:1	STOX1	0.4133	Minor_Salivary_Gland
ENSG00000177311	ENSG00000177311:2	ZBTB38	0.4133	Artery_Tibial
ENSG00000203896	ENSG00000203896:1	LIME1	0.4131	Pituitary
ENSG00000107669	ENSG00000107669:1	ATE1	0.413	Heart_Left_Ventricle
ENSG00000156103	ENSG00000156103:1	MMP16	0.4126	Skin_Sun_Exposed
ENSG00000144455	ENSG00000144455:2	SUMF1	0.4123	Skin_Sun_Exposed
ENSG00000170464	ENSG00000170464:1	DNAJC18	0.4122	Prostate
ENSG00000249715	ENSG00000249715:1	FER1L5	0.4118	Esophagus_Muscularis
ENSG00000131437	ENSG00000131437:1	KIF3A	0.4117	Skin_Not_Sun_Exposed
ENSG00000113319	ENSG00000113319:1	RASGRF2	0.4116	Heart_Left_Ventricle
ENSG00000170464	ENSG00000170464:1	DNAJC18	0.4114	Skin_Sun_Exposed
ENSG00000244045	ENSG00000244045:1	TMEM199	0.4113	Brain_Anterior_cingulate_cortex_BA24
ENSG00000184949	ENSG00000184949:1	FAM227A	0.4109	Small_Intestine_Terminal_Ileum
ENSG00000142599	ENSG00000142599:1	RERE	0.4108	Brain_Nucleus_accumbens_basal_ganglia
ENSG00000095777	ENSG00000095777:1	MYO3A	0.4107	Artery_Coronary
ENSG00000135127	ENSG00000135127:1	BICDL1	0.4106	Brain_Cerebellar_Hemisphere
ENSG00000185651	ENSG00000185651:1	UBE2L3	0.4102	Artery_Tibial
ENSG00000198961	ENSG00000198961:1	PJA2	0.4101	Adipose_Subcutaneous
ENSG00000122008	ENSG00000122008:1	POLK	0.4099	Adipose_Subcutaneous
ENSG00000170606	ENSG00000170606:1	HSPA4	0.4097	Pituitary
ENSG00000161180	ENSG00000161180:1	CCDC116	0.4092	Esophagus_Muscularis
ENSG00000087157	ENSG00000087157:2	PGS1	0.409	Brain_Caudate_basal_ganglia
ENSG00000244045	ENSG00000244045:1	TMEM199	0.4089	Esophagus_Gastroesophageal_Junction
ENSG00000114573	ENSG00000114573:1	ATP6V1A	0.4084	Artery_Tibial
ENSG00000116774	ENSG00000116774:3	OLFML3	0.4082	Nerve_Tibial
ENSG00000160712	ENSG00000160712:2	IL6R	0.408	Small_Intestine_Terminal_Ileum
ENSG00000100104	ENSG00000100104:1	SRRD	0.4078	Brain_Cerebellar_Hemisphere
ENSG00000134222	ENSG00000134222:2	PSRC1	0.4075	Heart_Atrial_Appendage
ENSG00000197114	ENSG00000197114:1	ZGPAT	0.4075	Thyroid
ENSG00000186501	ENSG00000186501:2	TMEM222	0.4074	Artery_Aorta
ENSG00000244045	ENSG00000244045:1	TMEM199	0.4074	Liver
ENSG00000137449	ENSG00000137449:1	CPEB2	0.4068	Esophagus_Muscularis
ENSG00000157036	ENSG00000157036:1	EXOG	0.4065	Heart_Atrial_Appendage
ENSG00000004142	ENSG00000004142:1	POLDIP2	0.4063	Esophagus_Mucosa
ENSG00000165895	ENSG00000165895:1	ARHGAP42	0.406	Adipose_Visceral_Omentum
ENSG00000157036	ENSG00000157036:1	EXOG	0.4059	Skin_Not_Sun_Exposed
ENSG00000173597	ENSG00000173597:2	SULT1B1	0.4057	Whole_Blood
ENSG00000184949	ENSG00000184949:1	FAM227A	0.4054	Pituitary
ENSG00000119878	ENSG00000119878:1	CRIPT	0.4052	Pancreas
ENSG00000100991	ENSG00000100991:1	TRPC4AP	0.4051	Esophagus_Mucosa
ENSG00000151233	ENSG00000151233:1	GXYLT1	0.405	Skin_Not_Sun_Exposed
ENSG00000186510	ENSG00000186510:1	CLCNKA	0.405	Artery_Tibial
ENSG00000165730	ENSG00000165730:1	STOX1	0.4046	Prostate
ENSG00000100239	ENSG00000100239:1	PPP6R2	0.4045	Brain_Putamen_basal_ganglia
ENSG00000011028	ENSG00000011028:1	MRC2	0.4042	Esophagus_Muscularis
ENSG00000142599	ENSG00000142599:1	RERE	0.4042	Brain_Caudate_basal_ganglia
ENSG00000141030	ENSG00000141030:1	COPS3	0.4041	Breast_Mammary_Tissue
ENSG00000064601	ENSG00000064601:2	CTSA	0.4037	Whole_Blood
ENSG00000011028	ENSG00000011028:1	MRC2	0.4036	Nerve_Tibial
ENSG00000170464	ENSG00000170464:1	DNAJC18	0.4036	Ovary
ENSG00000164889	ENSG00000164889:2	SLC4A2	0.4034	Esophagus_Muscularis
ENSG00000086102	ENSG00000086102:1	NFX1	0.4031	Stomach
ENSG00000011028	ENSG00000011028:1	MRC2	0.4029	Adipose_Subcutaneous
ENSG00000095777	ENSG00000095777:1	MYO3A	0.4027	Nerve_Tibial
ENSG00000132510	ENSG00000132510:1	KDM6B	0.4023	Colon_Sigmoid
ENSG00000244045	ENSG00000244045:1	TMEM199	0.4022	Cells_EBV-transformed_lymphocytes
ENSG00000177311	ENSG00000177311:1	ZBTB38	0.4021	Esophagus_Mucosa
ENSG00000037474	ENSG00000037474:1	NSUN2	0.4019	Kidney_Cortex
ENSG00000170606	ENSG00000170606:1	HSPA4	0.4019	Brain_Nucleus_accumbens_basal_ganglia
ENSG00000144021	ENSG00000144021:2	CIAO1	0.4014	Lung
ENSG00000183386	ENSG00000183386:1	FHL3	0.4014	Colon_Transverse
ENSG00000103404	ENSG00000103404:1	USP31	0.4011	Artery_Tibial
ENSG00000143198	ENSG00000143198:1	MGST3	0.4011	Whole_Blood
ENSG00000128203	ENSG00000128203:1	ASPHD2	0.401	Lung
ENSG00000130702	ENSG00000130702:2	LAMA5	0.401	Muscle_Skeletal
ENSG00000151233	ENSG00000151233:1	GXYLT1	0.401	Heart_Atrial_Appendage
ENSG00000103404	ENSG00000103404:1	USP31	0.4009	Artery_Aorta
ENSG00000177311	ENSG00000177311:1	ZBTB38	0.4007	Thyroid
ENSG00000170606	ENSG00000170606:1	HSPA4	0.4005	Brain_Hypothalamus
ENSG00000134982	ENSG00000134982:2	APC	0.4004	Muscle_Skeletal
ENSG00000186501	ENSG00000186501:2	TMEM222	0.4004	Thyroid
ENSG00000111328	ENSG00000111328:1	CDK2AP1	0.4002	Cells_Cultured_fibroblasts
ENSG00000089177	ENSG00000089177:3	KIF16B	0.4	Lung
ENSG00000254087	ENSG00000254087:1	LYN	0.4	Skin_Not_Sun_Exposed
ENSG00000161180	ENSG00000161180:1	CCDC116	0.3999	Spleen
ENSG00000172260	ENSG00000172260:1	NEGR1	0.3998	Brain_Putamen_basal_ganglia
ENSG00000156052	ENSG00000156052:1	GNAQ	0.3995	Cells_Cultured_fibroblasts
ENSG00000183011	ENSG00000183011:1	NAA38	0.3994	Esophagus_Muscularis
ENSG00000198478	ENSG00000198478:1	SH3BGRL2	0.3992	Brain_Amygdala
ENSG00000151292	ENSG00000151292:1	CSNK1G3	0.399	Brain_Anterior_cingulate_cortex_BA24
ENSG00000142961	ENSG00000142961:1	MOB3C	0.3988	Brain_Frontal_Cortex_BA9
ENSG00000144455	ENSG00000144455:2	SUMF1	0.3985	Colon_Transverse
ENSG00000185651	ENSG00000185651:1	UBE2L3	0.3983	Artery_Aorta
ENSG00000170606	ENSG00000170606:2	HSPA4	0.3979	Minor_Salivary_Gland
ENSG00000118655	ENSG00000118655:1	DCLRE1B	0.3977	Nerve_Tibial
ENSG00000115306	ENSG00000115306:2	SPTBN1	0.3974	Adipose_Subcutaneous
ENSG00000143198	ENSG00000143198:1	MGST3	0.3972	Cells_Cultured_fibroblasts
ENSG00000143801	ENSG00000143801:1	PSEN2	0.3971	Adrenal_Gland
ENSG00000137449	ENSG00000137449:1	CPEB2	0.397	Whole_Blood
ENSG00000004139	ENSG00000004139:1	SARM1	0.3968	Cells_Cultured_fibroblasts
ENSG00000111328	ENSG00000111328:2	CDK2AP1	0.3965	Whole_Blood
ENSG00000143198	ENSG00000143198:1	MGST3	0.3964	Cells_EBV-transformed_lymphocytes
ENSG00000120256	ENSG00000120256:1	LRP11	0.3963	Cells_Cultured_fibroblasts
ENSG00000095777	ENSG00000095777:1	MYO3A	0.396	Esophagus_Mucosa
ENSG00000108654	ENSG00000108654:1	DDX5	0.3959	Colon_Sigmoid
ENSG00000170606	ENSG00000170606:1	HSPA4	0.3959	Brain_Anterior_cingulate_cortex_BA24
ENSG00000148180	ENSG00000148180:1	GSN	0.3958	Kidney_Cortex
ENSG00000157036	ENSG00000157036:1	EXOG	0.3955	Uterus
ENSG00000185651	ENSG00000185651:1	UBE2L3	0.3954	Skin_Sun_Exposed
ENSG00000079277	ENSG00000079277:1	MKNK1	0.3952	Breast_Mammary_Tissue
ENSG00000005243	ENSG00000005243:1	COPZ2	0.3951	Testis
ENSG00000154803	ENSG00000154803:2	FLCN	0.3949	Thyroid
ENSG00000170606	ENSG00000170606:1	HSPA4	0.3949	Brain_Frontal_Cortex_BA9
ENSG00000185651	ENSG00000185651:1	UBE2L3	0.3949	Muscle_Skeletal
ENSG00000165730	ENSG00000165730:1	STOX1	0.3948	Artery_Coronary
ENSG00000111328	ENSG00000111328:1	CDK2AP1	0.3944	Liver
ENSG00000075413	ENSG00000075413:1	MARK3	0.3941	Colon_Transverse
ENSG00000151233	ENSG00000151233:1	GXYLT1	0.3941	Artery_Coronary
ENSG00000183011	ENSG00000183011:1	NAA38	0.3941	Brain_Nucleus_accumbens_basal_ganglia
ENSG00000100994	ENSG00000100994:2	PYGB	0.3939	Adrenal_Gland
ENSG00000214435	ENSG00000214435:2	AS3MT	0.3939	Whole_Blood
ENSG00000170464	ENSG00000170464:1	DNAJC18	0.3938	Heart_Left_Ventricle
ENSG00000075413	ENSG00000075413:1	MARK3	0.3937	Thyroid
ENSG00000137449	ENSG00000137449:1	CPEB2	0.3937	Skin_Sun_Exposed
ENSG00000084674	ENSG00000084674:1	APOB	0.3936	Esophagus_Gastroesophageal_Junction
ENSG00000135956	ENSG00000135956:1	TMEM127	0.3935	Esophagus_Gastroesophageal_Junction
ENSG00000054965	ENSG00000054965:2	FAM168A	0.3934	Spleen
ENSG00000135956	ENSG00000135956:1	TMEM127	0.3931	Brain_Hypothalamus
ENSG00000100991	ENSG00000100991:1	TRPC4AP	0.3928	Adrenal_Gland
ENSG00000136141	ENSG00000136141:2	LRCH1	0.3928	Liver
ENSG00000197930	ENSG00000197930:1	ERO1A	0.3926	Cells_Cultured_fibroblasts
ENSG00000244045	ENSG00000244045:1	TMEM199	0.3926	Breast_Mammary_Tissue
ENSG00000142961	ENSG00000142961:1	MOB3C	0.3919	Prostate
ENSG00000106511	ENSG00000106511:1	MEOX2	0.3916	Brain_Caudate_basal_ganglia
ENSG00000244045	ENSG00000244045:1	TMEM199	0.3916	Colon_Transverse
ENSG00000244045	ENSG00000244045:1	TMEM199	0.3915	Brain_Caudate_basal_ganglia
ENSG00000140320	ENSG00000140320:1	BAHD1	0.391	Skin_Sun_Exposed
ENSG00000011028	ENSG00000011028:1	MRC2	0.3909	Skin_Sun_Exposed
ENSG00000145358	ENSG00000145358:1	DDIT4L	0.3906	Muscle_Skeletal
ENSG00000075711	ENSG00000075711:1	DLG1	0.3902	Cells_Cultured_fibroblasts
ENSG00000144021	ENSG00000144021:2	CIAO1	0.3902	Prostate
ENSG00000244045	ENSG00000244045:1	TMEM199	0.3901	Brain_Putamen_basal_ganglia
ENSG00000115825	ENSG00000115825:3	PRKD3	0.39	Nerve_Tibial
ENSG00000140320	ENSG00000140320:1	BAHD1	0.3895	Breast_Mammary_Tissue
ENSG00000119878	ENSG00000119878:2	CRIPT	0.3891	Brain_Caudate_basal_ganglia
ENSG00000205356	ENSG00000205356:1	TECPR1	0.3891	Esophagus_Gastroesophageal_Junction
ENSG00000244045	ENSG00000244045:1	TMEM199	0.389	Thyroid
ENSG00000120833	ENSG00000120833:1	SOCS2	0.3888	Cells_Cultured_fibroblasts
ENSG00000213853	ENSG00000213853:1	EMP2	0.3888	Ovary
ENSG00000004139	ENSG00000004139:1	SARM1	0.3886	Whole_Blood
ENSG00000010295	ENSG00000010295:1	IFFO1	0.3886	Brain_Amygdala
ENSG00000139668	ENSG00000139668:1	WDFY2	0.3884	Brain_Cerebellar_Hemisphere
ENSG00000170464	ENSG00000170464:1	DNAJC18	0.3882	Esophagus_Mucosa
ENSG00000086102	ENSG00000086102:1	NFX1	0.3881	Adipose_Visceral_Omentum
ENSG00000134294	ENSG00000134294:1	SLC38A2	0.3881	Cells_Cultured_fibroblasts
ENSG00000100991	ENSG00000100991:2	TRPC4AP	0.388	Pituitary
ENSG00000174611	ENSG00000174611:1	KY	0.388	Testis
ENSG00000144810	ENSG00000144810:2	COL8A1	0.3879	Adipose_Subcutaneous
ENSG00000177311	ENSG00000177311:1	ZBTB38	0.3878	Skin_Sun_Exposed
ENSG00000117408	ENSG00000117408:1	IPO13	0.3877	Muscle_Skeletal
ENSG00000011028	ENSG00000011028:1	MRC2	0.3875	Colon_Transverse
ENSG00000170430	ENSG00000170430:4	MGMT	0.3875	Cells_Cultured_fibroblasts
ENSG00000213949	ENSG00000213949:2	ITGA1	0.3875	Pancreas
ENSG00000135956	ENSG00000135956:1	TMEM127	0.3874	Muscle_Skeletal
ENSG00000144455	ENSG00000144455:2	SUMF1	0.3874	Esophagus_Muscularis
ENSG00000164654	ENSG00000164654:2	MIOS	0.3874	Spleen
ENSG00000118200	ENSG00000118200:3	CAMSAP2	0.3871	Adipose_Subcutaneous
ENSG00000182584	ENSG00000182584:1	ACTL10	0.3871	Lung
ENSG00000141030	ENSG00000141030:1	COPS3	0.3868	Cells_Cultured_fibroblasts
ENSG00000163349	ENSG00000163349:1	HIPK1	0.3868	Brain_Cortex
ENSG00000037474	ENSG00000037474:1	NSUN2	0.3865	Brain_Amygdala
ENSG00000141030	ENSG00000141030:1	COPS3	0.3864	Colon_Transverse
ENSG00000164111	ENSG00000164111:2	ANXA5	0.3864	Whole_Blood
ENSG00000124356	ENSG00000124356:1	STAMBP	0.3861	Adipose_Subcutaneous
ENSG00000161180	ENSG00000161180:1	CCDC116	0.3858	Skin_Sun_Exposed
ENSG00000183011	ENSG00000183011:1	NAA38	0.3857	Skin_Not_Sun_Exposed
ENSG00000205795	ENSG00000205795:1	CYS1	0.3857	Heart_Atrial_Appendage
ENSG00000100099	ENSG00000100099:1	HPS4	0.3856	Brain_Hippocampus
ENSG00000142961	ENSG00000142961:1	MOB3C	0.385	Adipose_Subcutaneous
ENSG00000180806	ENSG00000180806:1	HOXC9	0.385	Lung
ENSG00000118420	ENSG00000118420:1	UBE3D	0.3848	Cells_Cultured_fibroblasts
ENSG00000186501	ENSG00000186501:1	TMEM222	0.3845	Prostate
ENSG00000111860	ENSG00000111860:1	CEP85L	0.3843	Esophagus_Muscularis
ENSG00000163349	ENSG00000163349:1	HIPK1	0.3843	Breast_Mammary_Tissue
ENSG00000273559	ENSG00000273559:2	CWC25	0.3843	Cells_Cultured_fibroblasts
ENSG00000172260	ENSG00000172260:1	NEGR1	0.3841	Brain_Caudate_basal_ganglia
ENSG00000180376	ENSG00000180376:4	CCDC66	0.3839	Muscle_Skeletal
ENSG00000119878	ENSG00000119878:1	CRIPT	0.3835	Artery_Aorta
ENSG00000165730	ENSG00000165730:1	STOX1	0.3835	Breast_Mammary_Tissue
ENSG00000183426	ENSG00000183426:1	NPIPA1	0.3832	Testis
ENSG00000183793	ENSG00000183793:1	NPIPA5	0.3832	Testis
ENSG00000198682	ENSG00000198682:1	PAPSS2	0.3831	Adipose_Subcutaneous
ENSG00000165730	ENSG00000165730:1	STOX1	0.383	Artery_Aorta
ENSG00000244045	ENSG00000244045:1	TMEM199	0.383	Brain_Nucleus_accumbens_basal_ganglia
ENSG00000184949	ENSG00000184949:1	FAM227A	0.3827	Heart_Left_Ventricle
ENSG00000088888	ENSG00000088888:1	MAVS	0.3825	Esophagus_Mucosa
ENSG00000075413	ENSG00000075413:1	MARK3	0.3822	Adipose_Subcutaneous
ENSG00000123095	ENSG00000123095:1	BHLHE41	0.3821	Liver
ENSG00000125520	ENSG00000125520:1	SLC2A4RG	0.382	Stomach
ENSG00000151233	ENSG00000151233:2	GXYLT1	0.3818	Esophagus_Muscularis
ENSG00000004139	ENSG00000004139:1	SARM1	0.3815	Breast_Mammary_Tissue
ENSG00000244045	ENSG00000244045:1	TMEM199	0.3814	Nerve_Tibial
ENSG00000144455	ENSG00000144455:2	SUMF1	0.3813	Artery_Coronary
ENSG00000178665	ENSG00000178665:4	ZNF713	0.3807	Artery_Aorta
ENSG00000092607	ENSG00000092607:1	TBX15	0.3806	Breast_Mammary_Tissue
ENSG00000169836	ENSG00000169836:1	TACR3	0.3806	Brain_Cortex
ENSG00000114573	ENSG00000114573:1	ATP6V1A	0.3801	Colon_Sigmoid
ENSG00000086102	ENSG00000086102:1	NFX1	0.38	Pancreas
ENSG00000142961	ENSG00000142961:1	MOB3C	0.38	Breast_Mammary_Tissue
ENSG00000161180	ENSG00000161180:1	CCDC116	0.3799	Artery_Coronary
ENSG00000125618	ENSG00000125618:2	PAX8	0.3798	Esophagus_Muscularis
ENSG00000019144	ENSG00000019144:1	PHLDB1	0.3796	Esophagus_Mucosa
ENSG00000171105	ENSG00000171105:3	INSR	0.3795	Artery_Tibial
ENSG00000174611	ENSG00000174611:1	KY	0.3795	Heart_Atrial_Appendage
ENSG00000183386	ENSG00000183386:1	FHL3	0.3795	Colon_Sigmoid
ENSG00000115694	ENSG00000115694:1	STK25	0.3794	Skin_Sun_Exposed
ENSG00000170606	ENSG00000170606:1	HSPA4	0.3794	Testis
ENSG00000071967	ENSG00000071967:2	CYBRD1	0.3792	Heart_Atrial_Appendage
ENSG00000144668	ENSG00000144668:1	ITGA9	0.379	Nerve_Tibial
ENSG00000026508	ENSG00000026508:1	CD44	0.3789	Nerve_Tibial
ENSG00000150051	ENSG00000150051:1	MKX	0.3789	Skin_Sun_Exposed
ENSG00000154803	ENSG00000154803:3	FLCN	0.3788	Adipose_Subcutaneous
ENSG00000079277	ENSG00000079277:1	MKNK1	0.3785	Artery_Aorta
ENSG00000079277	ENSG00000079277:1	MKNK1	0.3785	Brain_Frontal_Cortex_BA9
ENSG00000088888	ENSG00000088888:2	MAVS	0.3782	Pituitary
ENSG00000144455	ENSG00000144455:2	SUMF1	0.3782	Brain_Caudate_basal_ganglia
ENSG00000181264	ENSG00000181264:1	TLCD5	0.3782	Brain_Amygdala
ENSG00000239264	ENSG00000239264:1	TXNDC5	0.3782	Artery_Tibial
ENSG00000100982	ENSG00000100982:1	PCIF1	0.3781	Skin_Sun_Exposed
ENSG00000162104	ENSG00000162104:2	ADCY9	0.378	Pancreas
ENSG00000185651	ENSG00000185651:1	UBE2L3	0.378	Adipose_Subcutaneous
ENSG00000161180	ENSG00000161180:1	CCDC116	0.3779	Muscle_Skeletal
ENSG00000170464	ENSG00000170464:1	DNAJC18	0.3778	Heart_Atrial_Appendage
ENSG00000183431	ENSG00000183431:1	SF3A3	0.3778	Brain_Hippocampus
ENSG00000185651	ENSG00000185651:1	UBE2L3	0.3778	Esophagus_Muscularis
ENSG00000213445	ENSG00000213445:1	SIPA1	0.3777	Colon_Sigmoid
ENSG00000180767	ENSG00000180767:1	CHST13	0.3775	Minor_Salivary_Gland
ENSG00000002726	ENSG00000002726:1	AOC1	0.3773	Adipose_Subcutaneous
ENSG00000143198	ENSG00000143198:1	MGST3	0.3773	Colon_Sigmoid
ENSG00000088448	ENSG00000088448:2	ANKRD10	0.3769	Testis
ENSG00000090612	ENSG00000090612:1	ZNF268	0.3769	Esophagus_Mucosa
ENSG00000140320	ENSG00000140320:1	BAHD1	0.3769	Whole_Blood
ENSG00000165119	ENSG00000165119:1	HNRNPK	0.3769	Pancreas
ENSG00000145375	ENSG00000145375:1	SPATA5	0.3766	Artery_Tibial
ENSG00000120262	ENSG00000120262:1	CCDC170	0.3765	Heart_Atrial_Appendage
ENSG00000161180	ENSG00000161180:1	CCDC116	0.3764	Breast_Mammary_Tissue
ENSG00000143198	ENSG00000143198:1	MGST3	0.3763	Liver
ENSG00000095777	ENSG00000095777:1	MYO3A	0.3761	Thyroid
ENSG00000203896	ENSG00000203896:1	LIME1	0.3761	Breast_Mammary_Tissue
ENSG00000161179	ENSG00000161179:2	YDJC	0.3759	Breast_Mammary_Tissue
ENSG00000086102	ENSG00000086102:2	NFX1	0.3757	Cells_Cultured_fibroblasts
ENSG00000178966	ENSG00000178966:1	RMI1	0.3754	Liver
ENSG00000100304	ENSG00000100304:2	TTLL12	0.3751	Brain_Frontal_Cortex_BA9
ENSG00000170464	ENSG00000170464:1	DNAJC18	0.3748	Adrenal_Gland
ENSG00000178966	ENSG00000178966:1	RMI1	0.3747	Whole_Blood
ENSG00000151704	ENSG00000151704:1	KCNJ1	0.3745	Small_Intestine_Terminal_Ileum
ENSG00000187583	ENSG00000187583:1	PLEKHN1	0.374	Breast_Mammary_Tissue
ENSG00000170606	ENSG00000170606:1	HSPA4	0.3737	Brain_Putamen_basal_ganglia
ENSG00000179598	ENSG00000179598:1	PLD6	0.3737	Artery_Aorta
ENSG00000079277	ENSG00000079277:1	MKNK1	0.3736	Minor_Salivary_Gland
ENSG00000197930	ENSG00000197930:2	ERO1A	0.3735	Artery_Tibial
ENSG00000143198	ENSG00000143198:1	MGST3	0.3733	Adipose_Visceral_Omentum
ENSG00000280165	ENSG00000280165:1	PCDH20	0.373	Thyroid
ENSG00000105173	ENSG00000105173:1	CCNE1	0.3729	Kidney_Cortex
ENSG00000114573	ENSG00000114573:1	ATP6V1A	0.3729	Skin_Sun_Exposed
ENSG00000139668	ENSG00000139668:1	WDFY2	0.3729	Esophagus_Gastroesophageal_Junction
ENSG00000079277	ENSG00000079277:1	MKNK1	0.3728	Colon_Transverse
ENSG00000140577	ENSG00000140577:1	CRTC3	0.3727	Esophagus_Mucosa
ENSG00000114573	ENSG00000114573:1	ATP6V1A	0.3726	Colon_Transverse
ENSG00000073350	ENSG00000073350:1	LLGL2	0.3725	Breast_Mammary_Tissue
ENSG00000079277	ENSG00000079277:1	MKNK1	0.3725	Pituitary
ENSG00000070018	ENSG00000070018:2	LRP6	0.3724	Artery_Tibial
ENSG00000178966	ENSG00000178966:1	RMI1	0.3723	Breast_Mammary_Tissue
ENSG00000099785	ENSG00000099785:1	MARCHF2	0.3722	Kidney_Cortex
ENSG00000011028	ENSG00000011028:2	MRC2	0.371	Artery_Tibial
ENSG00000111328	ENSG00000111328:1	CDK2AP1	0.371	Esophagus_Gastroesophageal_Junction
ENSG00000022567	ENSG00000022567:1	SLC45A4	0.3709	Cells_Cultured_fibroblasts
ENSG00000086102	ENSG00000086102:1	NFX1	0.3707	Pituitary
ENSG00000071967	ENSG00000071967:1	CYBRD1	0.3705	Brain_Amygdala
ENSG00000177311	ENSG00000177311:1	ZBTB38	0.3704	Skin_Not_Sun_Exposed
ENSG00000134243	ENSG00000134243:1	SORT1	0.3703	Minor_Salivary_Gland
ENSG00000183779	ENSG00000183779:1	ZNF703	0.3703	Adipose_Subcutaneous
ENSG00000197548	ENSG00000197548:1	ATG7	0.3703	Liver
ENSG00000084674	ENSG00000084674:1	APOB	0.37	Esophagus_Muscularis
ENSG00000120860	ENSG00000120860:1	WASHC3	0.3698	Cells_Cultured_fibroblasts
ENSG00000166250	ENSG00000166250:1	CLMP	0.3697	Heart_Left_Ventricle
ENSG00000011028	ENSG00000011028:3	MRC2	0.3691	Esophagus_Mucosa
ENSG00000113205	ENSG00000113205:2	PCDHB3	0.369	Artery_Tibial
ENSG00000100304	ENSG00000100304:1	TTLL12	0.3688	Brain_Cortex
ENSG00000111328	ENSG00000111328:1	CDK2AP1	0.3688	Colon_Sigmoid
ENSG00000079277	ENSG00000079277:1	MKNK1	0.3687	Artery_Coronary
ENSG00000244045	ENSG00000244045:1	TMEM199	0.3685	Brain_Hippocampus
ENSG00000071967	ENSG00000071967:1	CYBRD1	0.3681	Brain_Cortex
ENSG00000100239	ENSG00000100239:2	PPP6R2	0.3677	Muscle_Skeletal
ENSG00000244045	ENSG00000244045:1	TMEM199	0.3677	Heart_Atrial_Appendage
ENSG00000144455	ENSG00000144455:2	SUMF1	0.3676	Nerve_Tibial
ENSG00000166444	ENSG00000166444:1	DENND2B	0.3676	Cells_EBV-transformed_lymphocytes
ENSG00000185499	ENSG00000185499:1	MUC1	0.3676	Testis
ENSG00000244045	ENSG00000244045:1	TMEM199	0.3676	Heart_Left_Ventricle
ENSG00000122778	ENSG00000122778:3	KIAA1549	0.3675	Muscle_Skeletal
ENSG00000075413	ENSG00000075413:1	MARK3	0.3673	Prostate
ENSG00000083123	ENSG00000083123:1	BCKDHB	0.3673	Artery_Tibial
ENSG00000170464	ENSG00000170464:1	DNAJC18	0.3673	Artery_Coronary
ENSG00000196504	ENSG00000196504:1	PRPF40A	0.3671	Cells_Cultured_fibroblasts
ENSG00000004139	ENSG00000004139:1	SARM1	0.367	Artery_Aorta
ENSG00000178665	ENSG00000178665:3	ZNF713	0.367	Esophagus_Muscularis
ENSG00000157036	ENSG00000157036:1	EXOG	0.3669	Adipose_Subcutaneous
ENSG00000165730	ENSG00000165730:1	STOX1	0.3669	Stomach
ENSG00000183520	ENSG00000183520:1	UTP11	0.3668	Cells_Cultured_fibroblasts
ENSG00000007944	ENSG00000007944:1	MYLIP	0.3667	Brain_Cerebellar_Hemisphere
ENSG00000135127	ENSG00000135127:1	BICDL1	0.3666	Brain_Nucleus_accumbens_basal_ganglia
ENSG00000197980	ENSG00000197980:1	LEKR1	0.3665	Brain_Amygdala
ENSG00000143198	ENSG00000143198:1	MGST3	0.3664	Nerve_Tibial
ENSG00000162104	ENSG00000162104:3	ADCY9	0.3662	Skin_Sun_Exposed
ENSG00000178966	ENSG00000178966:1	RMI1	0.3662	Cells_Cultured_fibroblasts
ENSG00000085832	ENSG00000085832:2	EPS15	0.3661	Thyroid
ENSG00000185651	ENSG00000185651:1	UBE2L3	0.3661	Spleen
ENSG00000165730	ENSG00000165730:1	STOX1	0.366	Esophagus_Gastroesophageal_Junction
ENSG00000111328	ENSG00000111328:1	CDK2AP1	0.3659	Adipose_Visceral_Omentum
ENSG00000198682	ENSG00000198682:1	PAPSS2	0.3658	Muscle_Skeletal
ENSG00000183762	ENSG00000183762:1	KREMEN1	0.3656	Skin_Sun_Exposed
ENSG00000239264	ENSG00000239264:1	TXNDC5	0.3656	Esophagus_Gastroesophageal_Junction
ENSG00000071967	ENSG00000071967:1	CYBRD1	0.3654	Esophagus_Gastroesophageal_Junction
ENSG00000143198	ENSG00000143198:1	MGST3	0.3649	Spleen
ENSG00000280165	ENSG00000280165:1	PCDH20	0.3648	Skin_Not_Sun_Exposed
ENSG00000143198	ENSG00000143198:1	MGST3	0.3645	Adrenal_Gland
ENSG00000185201	ENSG00000185201:1	IFITM2	0.3645	Adipose_Visceral_Omentum
ENSG00000111328	ENSG00000111328:1	CDK2AP1	0.3644	Artery_Tibial
ENSG00000161180	ENSG00000161180:1	CCDC116	0.3644	Cells_Cultured_fibroblasts
ENSG00000100979	ENSG00000100979:1	PLTP	0.364	Brain_Cerebellum
ENSG00000161180	ENSG00000161180:1	CCDC116	0.364	Minor_Salivary_Gland
ENSG00000179133	ENSG00000179133:1	C10orf67	0.3637	Skin_Sun_Exposed
ENSG00000111328	ENSG00000111328:1	CDK2AP1	0.3635	Skin_Sun_Exposed
ENSG00000180767	ENSG00000180767:1	CHST13	0.3635	Testis
ENSG00000187772	ENSG00000187772:1	LIN28B	0.3634	Pituitary
ENSG00000131055	ENSG00000131055:1	COX4I2	0.3632	Pituitary
ENSG00000070476	ENSG00000070476:2	ZXDC	0.363	Cells_Cultured_fibroblasts
ENSG00000131055	ENSG00000131055:1	COX4I2	0.363	Artery_Coronary
ENSG00000100239	ENSG00000100239:1	PPP6R2	0.3627	Brain_Caudate_basal_ganglia
ENSG00000100104	ENSG00000100104:1	SRRD	0.3626	Colon_Transverse
ENSG00000146535	ENSG00000146535:1	GNA12	0.3626	Small_Intestine_Terminal_Ileum
ENSG00000161180	ENSG00000161180:1	CCDC116	0.3625	Thyroid
ENSG00000116774	ENSG00000116774:3	OLFML3	0.3624	Muscle_Skeletal
ENSG00000108960	ENSG00000108960:1	MMD	0.3623	Brain_Amygdala
ENSG00000137166	ENSG00000137166:1	FOXP4	0.3623	Esophagus_Mucosa
ENSG00000088448	ENSG00000088448:2	ANKRD10	0.3622	Brain_Frontal_Cortex_BA9
ENSG00000037474	ENSG00000037474:1	NSUN2	0.362	Pituitary
ENSG00000105287	ENSG00000105287:1	PRKD2	0.362	Adrenal_Gland
ENSG00000143801	ENSG00000143801:1	PSEN2	0.362	Lung
ENSG00000140320	ENSG00000140320:1	BAHD1	0.3619	Spleen
ENSG00000144214	ENSG00000144214:1	LYG1	0.3619	Skin_Not_Sun_Exposed
ENSG00000185651	ENSG00000185651:1	UBE2L3	0.3618	Nerve_Tibial
ENSG00000088888	ENSG00000088888:1	MAVS	0.3617	Artery_Tibial
ENSG00000213445	ENSG00000213445:1	SIPA1	0.3617	Cells_Cultured_fibroblasts
ENSG00000178665	ENSG00000178665:1	ZNF713	0.3616	Spleen
ENSG00000107669	ENSG00000107669:2	ATE1	0.3615	Adipose_Visceral_Omentum
ENSG00000188290	ENSG00000188290:1	HES4	0.3612	Brain_Anterior_cingulate_cortex_BA24
ENSG00000004142	ENSG00000004142:2	POLDIP2	0.3611	Esophagus_Muscularis
ENSG00000161180	ENSG00000161180:1	CCDC116	0.3611	Heart_Left_Ventricle
ENSG00000197930	ENSG00000197930:1	ERO1A	0.361	Thyroid
ENSG00000140320	ENSG00000140320:1	BAHD1	0.3608	Pancreas
ENSG00000151240	ENSG00000151240:1	DIP2C	0.3608	Brain_Putamen_basal_ganglia
ENSG00000161180	ENSG00000161180:1	CCDC116	0.3607	Stomach
ENSG00000037474	ENSG00000037474:1	NSUN2	0.3605	Brain_Putamen_basal_ganglia
ENSG00000170606	ENSG00000170606:1	HSPA4	0.3605	Brain_Caudate_basal_ganglia
ENSG00000083123	ENSG00000083123:1	BCKDHB	0.3603	Artery_Aorta
ENSG00000140577	ENSG00000140577:1	CRTC3	0.3603	Skin_Sun_Exposed
[truncated: 4,689 more rows]

## Sheet: 1c
Ensembl ID	Cluster ID	Gene Name	RCP	GTEx Tissue	Nominal TWAS P-value	Bonferroni P-Value
ENSG00000115306	ENSG00000115306:3	SPTBN1	0.3344	Nerve_Tibial	0	<1E-325
ENSG00000115306	ENSG00000115306:2	SPTBN1	0.9469	Cells_Cultured_fibroblasts	0	<1E-325
ENSG00000115306	ENSG00000115306:1	SPTBN1	0.2516	Adipose_Visceral_Omentum	0	<1E-325
ENSG00000115306	ENSG00000115306:3	SPTBN1	0.6443	Artery_Tibial	0	<1E-325
ENSG00000115306	ENSG00000115306:1	SPTBN1	0.16	Kidney_Cortex	0	<1E-325
ENSG00000115306	ENSG00000115306:1	SPTBN1	0.2392	Colon_Sigmoid	0	<1E-325
ENSG00000115306	ENSG00000115306:2	SPTBN1	0.3974	Adipose_Subcutaneous	0	<1E-325
ENSG00000115306	ENSG00000115306:3	SPTBN1	0.2982	Esophagus_Muscularis	0	<1E-325
ENSG00000120262	ENSG00000120262:1	CCDC170	0.5812	Artery_Tibial	0	<1E-325
ENSG00000120262	ENSG00000120262:1	CCDC170	0.5497	Brain_Hypothalamus	0	<1E-325
ENSG00000120262	ENSG00000120262:1	CCDC170	0.6463	Adrenal_Gland	0	<1E-325
ENSG00000120262	ENSG00000120262:1	CCDC170	0.4948	Adipose_Visceral_Omentum	0	<1E-325
ENSG00000120262	ENSG00000120262:1	CCDC170	0.6582	Spleen	0	<1E-325
ENSG00000120262	ENSG00000120262:1	CCDC170	0.5408	Esophagus_Muscularis	0	<1E-325
ENSG00000120262	ENSG00000120262:3	CCDC170	0.6065	Brain_Frontal_Cortex_BA9	0	<1E-325
ENSG00000120262	ENSG00000120262:1	CCDC170	0.4687	Thyroid	0	<1E-325
ENSG00000120262	ENSG00000120262:1	CCDC170	0.1998	Esophagus_Gastroesophageal_Junction	0	<1E-325
ENSG00000120262	ENSG00000120262:1	CCDC170	0.3765	Heart_Atrial_Appendage	0	<1E-325
ENSG00000120262	ENSG00000120262:1	CCDC170	0.4879	Breast_Mammary_Tissue	0	<1E-325
ENSG00000120262	ENSG00000120262:1	CCDC170	0.5736	Skin_Sun_Exposed	0	<1E-325
ENSG00000120262	ENSG00000120262:2	CCDC170	0.3109	Lung	0	<1E-325
ENSG00000196937	ENSG00000196937:2	FAM3C	0.1462	Adipose_Visceral_Omentum	0	<1E-325
ENSG00000196937	ENSG00000196937:2	FAM3C	0.4917	Artery_Tibial	0	<1E-325
ENSG00000184702	ENSG00000184702:2	SEPT5	0.4428	Adipose_Visceral_Omentum	1.00975e-290	2.25517e-286
ENSG00000184702	ENSG00000184702:1	SEPT5	0.4505	Skin_Not_Sun_Exposed	1.00975e-290	2.25517e-286
ENSG00000184702	ENSG00000184702:1	SEPT5	0.4604	Adipose_Subcutaneous	1.00975e-290	2.25517e-286
ENSG00000184702	ENSG00000184702:2	SEPT5	0.3312	Breast_Mammary_Tissue	1.00975e-290	2.25517e-286
ENSG00000184702	ENSG00000184702:1	SEPT5	0.4868	Skin_Sun_Exposed	1.00975e-290	2.25517e-286
ENSG00000127418	ENSG00000127418:2	FGFRL1	0.1611	Cells_Cultured_fibroblasts	2.3766e-276	5.30789e-272
ENSG00000180875	ENSG00000180875:1	GREM2	0.2493	Adipose_Subcutaneous	1.92851e-261	4.30714e-257
ENSG00000180875	ENSG00000180875:1	GREM2	0.9998	Cells_Cultured_fibroblasts	1.92851e-261	4.30714e-257
ENSG00000180875	ENSG00000180875:1	GREM2	0.9671	Artery_Tibial	1.92851e-261	4.30714e-257
ENSG00000076650	ENSG00000076650:1	GPATCH1	0.3564	Whole_Blood	1.53854e-230	3.43618e-226
ENSG00000076650	ENSG00000076650:1	GPATCH1	0.1526	Spleen	1.53854e-230	3.43618e-226
ENSG00000131941	ENSG00000131941:2	RHPN2	0.1413	Brain_Anterior_cingulate_cortex_BA24	3.89882e-225	8.70762e-221
ENSG00000131941	ENSG00000131941:2	RHPN2	0.1187	Brain_Nucleus_accumbens_basal_ganglia	3.89882e-225	8.70762e-221
ENSG00000131941	ENSG00000131941:1	RHPN2	0.1741	Brain_Amygdala	3.89882e-225	8.70762e-221
ENSG00000131941	ENSG00000131941:2	RHPN2	0.2181	Pituitary	3.89882e-225	8.70762e-221
ENSG00000125378	ENSG00000125378:1	BMP4	0.2935	Pituitary	2.45957e-173	5.4932e-169
ENSG00000125378	ENSG00000125378:1	BMP4	0.1593	Adrenal_Gland	2.45957e-173	5.4932e-169
ENSG00000125378	ENSG00000125378:1	BMP4	0.4253	Thyroid	2.45957e-173	5.4932e-169
ENSG00000125378	ENSG00000125378:2	BMP4	0.3482	Brain_Cerebellum	2.45957e-173	5.4932e-169
ENSG00000125378	ENSG00000125378:1	BMP4	0.2938	Ovary	2.45957e-173	5.4932e-169
ENSG00000125378	ENSG00000125378:1	BMP4	0.5468	Brain_Cortex	2.45957e-173	5.4932e-169
ENSG00000125378	ENSG00000125378:1	BMP4	0.2295	Brain_Hippocampus	2.45957e-173	5.4932e-169
ENSG00000125378	ENSG00000125378:1	BMP4	0.1696	Artery_Aorta	2.45957e-173	5.4932e-169
ENSG00000125378	ENSG00000125378:1	BMP4	0.536	Brain_Frontal_Cortex_BA9	2.45957e-173	5.4932e-169
ENSG00000125378	ENSG00000125378:2	BMP4	0.2028	Brain_Caudate_basal_ganglia	2.45957e-173	5.4932e-169
ENSG00000125378	ENSG00000125378:1	BMP4	0.4657	Testis	2.45957e-173	5.4932e-169
ENSG00000125378	ENSG00000125378:1	BMP4	0.2276	Brain_Hypothalamus	2.45957e-173	5.4932e-169
ENSG00000125378	ENSG00000125378:1	BMP4	0.1538	Brain_Nucleus_accumbens_basal_ganglia	2.45957e-173	5.4932e-169
ENSG00000124813	ENSG00000124813:1	RUNX2	0.2372	Esophagus_Gastroesophageal_Junction	8.89681e-151	1.98701e-146
ENSG00000162878	ENSG00000162878:1	PKDCC	0.2904	Brain_Cortex	2.5347e-136	5.66101e-132
ENSG00000177150	ENSG00000177150:1	FAM210A	0.1964	Spleen	1.94132e-132	4.33575e-128
ENSG00000177150	ENSG00000177150:2	FAM210A	0.1516	Cells_Cultured_fibroblasts	1.94132e-132	4.33575e-128
ENSG00000137869	ENSG00000137869:1	CYP19A1	0.8468	Skin_Sun_Exposed	4.90554e-108	1.0956e-103
ENSG00000137869	ENSG00000137869:1	CYP19A1	0.186	Spleen	4.90554e-108	1.0956e-103
ENSG00000137869	ENSG00000137869:1	CYP19A1	0.3186	Whole_Blood	4.90554e-108	1.0956e-103
ENSG00000100249	ENSG00000100249:1	C22orf31	0.2462	Adrenal_Gland	8.1798e-104	1.82688e-99
ENSG00000100249	ENSG00000100249:1	C22orf31	0.1453	Thyroid	8.1798e-104	1.82688e-99
ENSG00000162552	ENSG00000162552:2	WNT4	0.1717	Colon_Transverse	3.91834e-100	8.75122e-96
ENSG00000166166	ENSG00000166166:1	TRMT61A	0.1116	Breast_Mammary_Tissue	8.52529e-99	1.90404e-94
ENSG00000166166	ENSG00000166166:1	TRMT61A	0.1712	Adipose_Subcutaneous	8.52529e-99	1.90404e-94
ENSG00000166166	ENSG00000166166:1	TRMT61A	0.1022	Lung	8.52529e-99	1.90404e-94
ENSG00000166165	ENSG00000166165:1	CKB	0.141	Lung	3.1732e-98	7.08702e-94
ENSG00000110075	ENSG00000110075:1	PPP6R3	0.1376	Stomach	2.55023e-97	5.69568e-93
ENSG00000110075	ENSG00000110075:1	PPP6R3	0.2755	Brain_Putamen_basal_ganglia	2.55023e-97	5.69568e-93
ENSG00000110075	ENSG00000110075:1	PPP6R3	0.4998	Ovary	2.55023e-97	5.69568e-93
ENSG00000110075	ENSG00000110075:1	PPP6R3	0.5291	Thyroid	2.55023e-97	5.69568e-93
ENSG00000183762	ENSG00000183762:1	KREMEN1	0.1343	Esophagus_Gastroesophageal_Junction	6.73594e-95	1.5044e-90
ENSG00000183762	ENSG00000183762:2	KREMEN1	0.1079	Esophagus_Mucosa	6.73594e-95	1.5044e-90
ENSG00000183762	ENSG00000183762:1	KREMEN1	0.1088	Kidney_Cortex	6.73594e-95	1.5044e-90
ENSG00000183762	ENSG00000183762:1	KREMEN1	0.5692	Thyroid	6.73594e-95	1.5044e-90
ENSG00000183762	ENSG00000183762:1	KREMEN1	0.1032	Minor_Salivary_Gland	6.73594e-95	1.5044e-90
ENSG00000183762	ENSG00000183762:1	KREMEN1	0.2407	Colon_Sigmoid	6.73594e-95	1.5044e-90
ENSG00000183762	ENSG00000183762:1	KREMEN1	0.6158	Liver	6.73594e-95	1.5044e-90
ENSG00000183762	ENSG00000183762:1	KREMEN1	0.6599	Adipose_Subcutaneous	6.73594e-95	1.5044e-90
ENSG00000183762	ENSG00000183762:1	KREMEN1	0.1514	Esophagus_Muscularis	6.73594e-95	1.5044e-90
ENSG00000183762	ENSG00000183762:1	KREMEN1	0.5883	Artery_Tibial	6.73594e-95	1.5044e-90
ENSG00000183762	ENSG00000183762:1	KREMEN1	0.3215	Pituitary	6.73594e-95	1.5044e-90
ENSG00000183762	ENSG00000183762:1	KREMEN1	0.6346	Adrenal_Gland	6.73594e-95	1.5044e-90
ENSG00000183762	ENSG00000183762:1	KREMEN1	0.6264	Breast_Mammary_Tissue	6.73594e-95	1.5044e-90
ENSG00000183762	ENSG00000183762:1	KREMEN1	0.3656	Skin_Sun_Exposed	6.73594e-95	1.5044e-90
ENSG00000183762	ENSG00000183762:1	KREMEN1	0.3512	Artery_Coronary	6.73594e-95	1.5044e-90
ENSG00000183762	ENSG00000183762:1	KREMEN1	0.5288	Nerve_Tibial	6.73594e-95	1.5044e-90
ENSG00000183762	ENSG00000183762:1	KREMEN1	0.6596	Adipose_Visceral_Omentum	6.73594e-95	1.5044e-90
ENSG00000183762	ENSG00000183762:1	KREMEN1	0.6544	Pancreas	6.73594e-95	1.5044e-90
ENSG00000183762	ENSG00000183762:1	KREMEN1	0.5116	Skin_Not_Sun_Exposed	6.73594e-95	1.5044e-90
ENSG00000183762	ENSG00000183762:1	KREMEN1	0.8686	Heart_Left_Ventricle	6.73594e-95	1.5044e-90
ENSG00000075413	ENSG00000075413:2	MARK3	0.158	Muscle_Skeletal	2.15943e-92	4.82288e-88
ENSG00000075413	ENSG00000075413:1	MARK3	0.3466	Pituitary	2.15943e-92	4.82288e-88
ENSG00000075413	ENSG00000075413:1	MARK3	0.1647	Brain_Caudate_basal_ganglia	2.15943e-92	4.82288e-88
ENSG00000075413	ENSG00000075413:1	MARK3	0.1068	Brain_Anterior_cingulate_cortex_BA24	2.15943e-92	4.82288e-88
ENSG00000075413	ENSG00000075413:1	MARK3	0.3673	Prostate	2.15943e-92	4.82288e-88
ENSG00000075413	ENSG00000075413:1	MARK3	0.2943	Brain_Frontal_Cortex_BA9	2.15943e-92	4.82288e-88
ENSG00000075413	ENSG00000075413:1	MARK3	0.2974	Skin_Sun_Exposed	2.15943e-92	4.82288e-88
ENSG00000075413	ENSG00000075413:1	MARK3	0.439	Breast_Mammary_Tissue	2.15943e-92	4.82288e-88
ENSG00000075413	ENSG00000075413:1	MARK3	0.238	Skin_Not_Sun_Exposed	2.15943e-92	4.82288e-88
ENSG00000075413	ENSG00000075413:1	MARK3	0.3937	Thyroid	2.15943e-92	4.82288e-88
ENSG00000075413	ENSG00000075413:1	MARK3	0.2924	Minor_Salivary_Gland	2.15943e-92	4.82288e-88
ENSG00000075413	ENSG00000075413:1	MARK3	0.4442	Pancreas	2.15943e-92	4.82288e-88
ENSG00000075413	ENSG00000075413:1	MARK3	0.2158	Stomach	2.15943e-92	4.82288e-88
ENSG00000075413	ENSG00000075413:1	MARK3	0.3822	Adipose_Subcutaneous	2.15943e-92	4.82288e-88
ENSG00000075413	ENSG00000075413:1	MARK3	0.1287	Brain_Cortex	2.15943e-92	4.82288e-88
ENSG00000075413	ENSG00000075413:1	MARK3	0.3283	Nerve_Tibial	2.15943e-92	4.82288e-88
ENSG00000075413	ENSG00000075413:1	MARK3	0.2435	Ovary	2.15943e-92	4.82288e-88
ENSG00000075413	ENSG00000075413:1	MARK3	0.3354	Lung	2.15943e-92	4.82288e-88
ENSG00000075413	ENSG00000075413:1	MARK3	0.3941	Colon_Transverse	2.15943e-92	4.82288e-88
ENSG00000196660	ENSG00000196660:1	SLC30A10	0.1162	Brain_Cortex	1.71391e-75	3.82785e-71
ENSG00000197980	ENSG00000197980:1	LEKR1	0.1453	Brain_Spinal_cord_cervical_c-1	1.26201e-74	2.81856e-70
ENSG00000197980	ENSG00000197980:1	LEKR1	0.3576	Brain_Putamen_basal_ganglia	1.26201e-74	2.81856e-70
ENSG00000197980	ENSG00000197980:1	LEKR1	0.3665	Brain_Amygdala	1.26201e-74	2.81856e-70
ENSG00000197980	ENSG00000197980:1	LEKR1	0.2094	Brain_Hypothalamus	1.26201e-74	2.81856e-70
ENSG00000197980	ENSG00000197980:1	LEKR1	0.2836	Esophagus_Gastroesophageal_Junction	1.26201e-74	2.81856e-70
ENSG00000197980	ENSG00000197980:1	LEKR1	0.2353	Brain_Frontal_Cortex_BA9	1.26201e-74	2.81856e-70
ENSG00000197980	ENSG00000197980:1	LEKR1	0.1312	Heart_Atrial_Appendage	1.26201e-74	2.81856e-70
ENSG00000197980	ENSG00000197980:1	LEKR1	0.1024	Esophagus_Muscularis	1.26201e-74	2.81856e-70
ENSG00000111186	ENSG00000111186:2	WNT5B	0.1678	Artery_Coronary	2.09328e-73	4.67514e-69
ENSG00000150051	ENSG00000150051:1	MKX	0.3789	Skin_Sun_Exposed	4.44698e-69	9.93188e-65
ENSG00000131668	ENSG00000131668:1	BARX1	0.7764	Colon_Transverse	2.84879e-67	6.3625e-63
ENSG00000134569	ENSG00000134569:1	LRP4	0.7943	Pancreas	6.78536e-67	1.51544e-62
ENSG00000134569	ENSG00000134569:1	LRP4	0.5355	Cells_Cultured_fibroblasts	6.78536e-67	1.51544e-62
ENSG00000149182	ENSG00000149182:1	ARFGAP2	0.135	Esophagus_Mucosa	8.60647e-66	1.92217e-61
ENSG00000149182	ENSG00000149182:1	ARFGAP2	0.2238	Skin_Not_Sun_Exposed	8.60647e-66	1.92217e-61
ENSG00000165912	ENSG00000165912:1	PACSIN3	0.2758	Artery_Aorta	2.3789e-62	5.31304e-58
ENSG00000106511	ENSG00000106511:1	MEOX2	0.3264	Brain_Anterior_cingulate_cortex_BA24	1.43559e-57	3.20625e-53
ENSG00000106511	ENSG00000106511:2	MEOX2	0.5315	Artery_Tibial	1.43559e-57	3.20625e-53
ENSG00000106511	ENSG00000106511:1	MEOX2	0.3916	Brain_Caudate_basal_ganglia	1.43559e-57	3.20625e-53
ENSG00000106511	ENSG00000106511:1	MEOX2	0.1741	Brain_Hypothalamus	1.43559e-57	3.20625e-53
ENSG00000106511	ENSG00000106511:1	MEOX2	0.5394	Brain_Frontal_Cortex_BA9	1.43559e-57	3.20625e-53
ENSG00000106511	ENSG00000106511:1	MEOX2	0.6286	Brain_Nucleus_accumbens_basal_ganglia	1.43559e-57	3.20625e-53
ENSG00000064932	ENSG00000064932:1	SBNO2	0.1365	Adrenal_Gland	1.73518e-54	3.87535e-50
ENSG00000142599	ENSG00000142599:1	RERE	0.4108	Brain_Nucleus_accumbens_basal_ganglia	3.11106e-50	6.94825e-46
ENSG00000142599	ENSG00000142599:1	RERE	0.6093	Nerve_Tibial	3.11106e-50	6.94825e-46
ENSG00000142599	ENSG00000142599:1	RERE	0.4042	Brain_Caudate_basal_ganglia	3.11106e-50	6.94825e-46
ENSG00000142599	ENSG00000142599:1	RERE	0.1617	Brain_Frontal_Cortex_BA9	3.11106e-50	6.94825e-46
ENSG00000142599	ENSG00000142599:1	RERE	0.5711	Cells_Cultured_fibroblasts	3.11106e-50	6.94825e-46
ENSG00000142599	ENSG00000142599:1	RERE	0.2865	Breast_Mammary_Tissue	3.11106e-50	6.94825e-46
ENSG00000142599	ENSG00000142599:1	RERE	0.6431	Adipose_Subcutaneous	3.11106e-50	6.94825e-46
ENSG00000142599	ENSG00000142599:1	RERE	0.1396	Brain_Putamen_basal_ganglia	3.11106e-50	6.94825e-46
ENSG00000142599	ENSG00000142599:1	RERE	0.5533	Brain_Cortex	3.11106e-50	6.94825e-46
ENSG00000142599	ENSG00000142599:1	RERE	0.1922	Brain_Anterior_cingulate_cortex_BA24	3.11106e-50	6.94825e-46
ENSG00000088387	ENSG00000088387:1	DOCK9	0.2473	Heart_Left_Ventricle	3.538e-49	7.90176e-45
ENSG00000088387	ENSG00000088387:1	DOCK9	0.3052	Skin_Sun_Exposed	3.538e-49	7.90176e-45
ENSG00000088387	ENSG00000088387:1	DOCK9	0.6618	Nerve_Tibial	3.538e-49	7.90176e-45
ENSG00000026508	ENSG00000026508:1	CD44	0.6557	Artery_Tibial	4.41256e-48	9.85502e-44
ENSG00000026508	ENSG00000026508:1	CD44	0.3789	Nerve_Tibial	4.41256e-48	9.85502e-44
ENSG00000026508	ENSG00000026508:1	CD44	0.4267	Muscle_Skeletal	4.41256e-48	9.85502e-44
ENSG00000026508	ENSG00000026508:1	CD44	0.4596	Adipose_Subcutaneous	4.41256e-48	9.85502e-44
ENSG00000026508	ENSG00000026508:1	CD44	0.1641	Artery_Aorta	4.41256e-48	9.85502e-44
ENSG00000079819	ENSG00000079819:1	EPB41L2	0.1893	Heart_Left_Ventricle	2.03049e-47	4.53489e-43
ENSG00000079819	ENSG00000079819:1	EPB41L2	0.2641	Colon_Sigmoid	2.03049e-47	4.53489e-43
ENSG00000079819	ENSG00000079819:2	EPB41L2	0.1301	Brain_Cortex	2.03049e-47	4.53489e-43
ENSG00000079819	ENSG00000079819:1	EPB41L2	0.4353	Esophagus_Muscularis	2.03049e-47	4.53489e-43
ENSG00000079819	ENSG00000079819:1	EPB41L2	0.2563	Esophagus_Gastroesophageal_Junction	2.03049e-47	4.53489e-43
ENSG00000079819	ENSG00000079819:1	EPB41L2	0.169	Heart_Atrial_Appendage	2.03049e-47	4.53489e-43
ENSG00000079819	ENSG00000079819:2	EPB41L2	0.2017	Esophagus_Mucosa	2.03049e-47	4.53489e-43
ENSG00000079819	ENSG00000079819:1	EPB41L2	0.2772	Lung	2.03049e-47	4.53489e-43
ENSG00000148737	ENSG00000148737:1	TCF7L2	0.4932	Cells_Cultured_fibroblasts	9.16138e-47	2.0461e-42
ENSG00000149179	ENSG00000149179:2	C11orf49	0.2155	Esophagus_Mucosa	4.63077e-46	1.03424e-41
ENSG00000213445	ENSG00000213445:1	SIPA1	0.2325	Brain_Cerebellum	1.90622e-45	4.25734e-41
ENSG00000213445	ENSG00000213445:1	SIPA1	0.3555	Whole_Blood	1.90622e-45	4.25734e-41
ENSG00000213445	ENSG00000213445:1	SIPA1	0.2564	Brain_Hippocampus	1.90622e-45	4.25734e-41
ENSG00000213445	ENSG00000213445:1	SIPA1	0.1138	Small_Intestine_Terminal_Ileum	1.90622e-45	4.25734e-41
ENSG00000213445	ENSG00000213445:1	SIPA1	0.3777	Colon_Sigmoid	1.90622e-45	4.25734e-41
ENSG00000213445	ENSG00000213445:1	SIPA1	0.2307	Breast_Mammary_Tissue	1.90622e-45	4.25734e-41
ENSG00000213445	ENSG00000213445:1	SIPA1	0.3617	Cells_Cultured_fibroblasts	1.90622e-45	4.25734e-41
ENSG00000213445	ENSG00000213445:1	SIPA1	0.3355	Minor_Salivary_Gland	1.90622e-45	4.25734e-41
ENSG00000213445	ENSG00000213445:1	SIPA1	0.3506	Cells_EBV-transformed_lymphocytes	1.90622e-45	4.25734e-41
ENSG00000213445	ENSG00000213445:1	SIPA1	0.36	Adipose_Subcutaneous	1.90622e-45	4.25734e-41
ENSG00000213445	ENSG00000213445:1	SIPA1	0.3345	Esophagus_Gastroesophageal_Junction	1.90622e-45	4.25734e-41
ENSG00000213445	ENSG00000213445:1	SIPA1	0.1646	Brain_Cortex	1.90622e-45	4.25734e-41
ENSG00000213445	ENSG00000213445:1	SIPA1	0.2579	Esophagus_Muscularis	1.90622e-45	4.25734e-41
ENSG00000213445	ENSG00000213445:2	SIPA1	0.1585	Pancreas	1.90622e-45	4.25734e-41
ENSG00000213445	ENSG00000213445:1	SIPA1	0.1821	Uterus	1.90622e-45	4.25734e-41
ENSG00000213445	ENSG00000213445:1	SIPA1	0.2169	Heart_Atrial_Appendage	1.90622e-45	4.25734e-41
ENSG00000213445	ENSG00000213445:1	SIPA1	0.2783	Thyroid	1.90622e-45	4.25734e-41
ENSG00000213445	ENSG00000213445:1	SIPA1	0.9981	Nerve_Tibial	1.90622e-45	4.25734e-41
ENSG00000213445	ENSG00000213445:1	SIPA1	0.2956	Esophagus_Mucosa	1.90622e-45	4.25734e-41
ENSG00000213445	ENSG00000213445:1	SIPA1	0.3464	Lung	1.90622e-45	4.25734e-41
ENSG00000213445	ENSG00000213445:1	SIPA1	0.3224	Colon_Transverse	1.90622e-45	4.25734e-41
ENSG00000213445	ENSG00000213445:1	SIPA1	0.124	Brain_Caudate_basal_ganglia	1.90622e-45	4.25734e-41
ENSG00000213445	ENSG00000213445:1	SIPA1	0.2315	Brain_Cerebellar_Hemisphere	1.90622e-45	4.25734e-41
ENSG00000213445	ENSG00000213445:4	SIPA1	0.2598	Cells_Cultured_fibroblasts	1.90622e-45	4.25734e-41
ENSG00000182179	ENSG00000182179:2	UBA7	0.1045	Artery_Aorta	8.24447e-45	1.84132e-40
ENSG00000110696	ENSG00000110696:1	C11orf58	0.1334	Pancreas	1.08186e-44	2.41622e-40
ENSG00000110696	ENSG00000110696:1	C11orf58	0.2521	Testis	1.08186e-44	2.41622e-40
ENSG00000110696	ENSG00000110696:1	C11orf58	0.1294	Artery_Coronary	1.08186e-44	2.41622e-40
ENSG00000164077	ENSG00000164077:1	MON1A	0.1407	Heart_Atrial_Appendage	8.42744e-44	1.88219e-39
ENSG00000164077	ENSG00000164077:2	MON1A	0.1511	Thyroid	8.42744e-44	1.88219e-39
ENSG00000164077	ENSG00000164077:1	MON1A	0.1622	Whole_Blood	8.42744e-44	1.88219e-39
ENSG00000156535	ENSG00000156535:1	CD109	0.469	Spleen	5.33328e-43	1.19113e-38
ENSG00000156535	ENSG00000156535:2	CD109	0.1303	Colon_Sigmoid	5.33328e-43	1.19113e-38
ENSG00000166949	ENSG00000166949:2	SMAD3	0.9336	Thyroid	2.22e-41	4.95816e-37
ENSG00000136628	ENSG00000136628:1	EPRS	0.2229	Muscle_Skeletal	8.39887e-38	1.8758e-33
ENSG00000138639	ENSG00000138639:1	ARHGAP24	0.7688	Artery_Coronary	1.48749e-37	3.32216e-33
ENSG00000138639	ENSG00000138639:1	ARHGAP24	0.3497	Cells_Cultured_fibroblasts	1.48749e-37	3.32216e-33
ENSG00000138639	ENSG00000138639:1	ARHGAP24	0.9952	Artery_Tibial	1.48749e-37	3.32216e-33
ENSG00000138639	ENSG00000138639:1	ARHGAP24	0.1948	Breast_Mammary_Tissue	1.48749e-37	3.32216e-33
ENSG00000138639	ENSG00000138639:1	ARHGAP24	0.1661	Adipose_Subcutaneous	1.48749e-37	3.32216e-33
ENSG00000138639	ENSG00000138639:1	ARHGAP24	0.9516	Artery_Aorta	1.48749e-37	3.32216e-33
ENSG00000077549	ENSG00000077549:1	CAPZB	0.6716	Testis	1.63196e-37	3.64481e-33
ENSG00000153071	ENSG00000153071:1	DAB2	0.1501	Thyroid	4.69773e-37	1.04919e-32
ENSG00000139044	ENSG00000139044:1	B4GALNT3	0.8715	Artery_Coronary	2.68795e-35	6.00326e-31
ENSG00000139044	ENSG00000139044:1	B4GALNT3	0.9241	Artery_Aorta	2.68795e-35	6.00326e-31
ENSG00000139044	ENSG00000139044:1	B4GALNT3	0.8869	Ovary	2.68795e-35	6.00326e-31
ENSG00000139044	ENSG00000139044:1	B4GALNT3	0.9077	Artery_Tibial	2.68795e-35	6.00326e-31
ENSG00000100991	ENSG00000100991:1	TRPC4AP	0.4938	Adipose_Subcutaneous	3.85781e-35	8.61602e-31
ENSG00000100991	ENSG00000100991:2	TRPC4AP	0.2398	Skin_Sun_Exposed	3.85781e-35	8.61602e-31
ENSG00000100991	ENSG00000100991:1	TRPC4AP	0.4051	Esophagus_Mucosa	3.85781e-35	8.61602e-31
ENSG00000100991	ENSG00000100991:2	TRPC4AP	0.1138	Small_Intestine_Terminal_Ileum	3.85781e-35	8.61602e-31
ENSG00000100991	ENSG00000100991:3	TRPC4AP	0.2525	Whole_Blood	3.85781e-35	8.61602e-31
ENSG00000100991	ENSG00000100991:1	TRPC4AP	0.3928	Adrenal_Gland	3.85781e-35	8.61602e-31
ENSG00000100991	ENSG00000100991:1	TRPC4AP	0.4748	Adipose_Visceral_Omentum	3.85781e-35	8.61602e-31
ENSG00000100991	ENSG00000100991:1	TRPC4AP	0.4541	Liver	3.85781e-35	8.61602e-31
ENSG00000100991	ENSG00000100991:3	TRPC4AP	0.4561	Nerve_Tibial	3.85781e-35	8.61602e-31
ENSG00000100991	ENSG00000100991:2	TRPC4AP	0.4503	Spleen	3.85781e-35	8.61602e-31
ENSG00000100991	ENSG00000100991:4	TRPC4AP	0.4666	Lung	3.85781e-35	8.61602e-31
ENSG00000100991	ENSG00000100991:1	TRPC4AP	0.4448	Thyroid	3.85781e-35	8.61602e-31
ENSG00000100991	ENSG00000100991:2	TRPC4AP	0.388	Pituitary	3.85781e-35	8.61602e-31
ENSG00000100991	ENSG00000100991:1	TRPC4AP	0.5271	Esophagus_Muscularis	3.85781e-35	8.61602e-31
ENSG00000100991	ENSG00000100991:2	TRPC4AP	0.4255	Esophagus_Gastroesophageal_Junction	3.85781e-35	8.61602e-31
ENSG00000100991	ENSG00000100991:2	TRPC4AP	0.5047	Cells_Cultured_fibroblasts	3.85781e-35	8.61602e-31
ENSG00000100991	ENSG00000100991:2	TRPC4AP	0.5577	Breast_Mammary_Tissue	3.85781e-35	8.61602e-31
ENSG00000100991	ENSG00000100991:2	TRPC4AP	0.4226	Pancreas	3.85781e-35	8.61602e-31
ENSG00000100991	ENSG00000100991:2	TRPC4AP	0.1655	Stomach	3.85781e-35	8.61602e-31
ENSG00000100991	ENSG00000100991:1	TRPC4AP	0.2595	Heart_Atrial_Appendage	3.85781e-35	8.61602e-31
ENSG00000100991	ENSG00000100991:2	TRPC4AP	0.4935	Colon_Sigmoid	3.85781e-35	8.61602e-31
ENSG00000100991	ENSG00000100991:1	TRPC4AP	0.3322	Colon_Transverse	3.85781e-35	8.61602e-31
ENSG00000163104	ENSG00000163104:1	SMARCAD1	0.1327	Pituitary	4.15926e-35	9.28928e-31
ENSG00000163104	ENSG00000163104:1	SMARCAD1	0.1093	Adipose_Subcutaneous	4.15926e-35	9.28928e-31
ENSG00000163104	ENSG00000163104:1	SMARCAD1	0.1328	Testis	4.15926e-35	9.28928e-31
ENSG00000163104	ENSG00000163104:1	SMARCAD1	0.1077	Lung	4.15926e-35	9.28928e-31
ENSG00000163104	ENSG00000163104:1	SMARCAD1	0.1294	Esophagus_Mucosa	4.15926e-35	9.28928e-31
ENSG00000167601	ENSG00000167601:2	AXL	0.6042	Esophagus_Muscularis	4.36132e-35	9.74057e-31
ENSG00000167601	ENSG00000167601:2	AXL	0.5085	Skin_Sun_Exposed	4.36132e-35	9.74057e-31
ENSG00000167601	ENSG00000167601:2	AXL	0.137	Adipose_Subcutaneous	4.36132e-35	9.74057e-31
ENSG00000167601	ENSG00000167601:1	AXL	0.6205	Minor_Salivary_Gland	4.36132e-35	9.74057e-31
ENSG00000167601	ENSG00000167601:2	AXL	0.2534	Esophagus_Gastroesophageal_Junction	4.36132e-35	9.74057e-31
ENSG00000167601	ENSG00000167601:2	AXL	0.2676	Ovary	4.36132e-35	9.74057e-31
ENSG00000113319	ENSG00000113319:2	RASGRF2	0.4683	Spleen	8.04855e-35	1.79756e-30
ENSG00000113319	ENSG00000113319:3	RASGRF2	0.1521	Heart_Atrial_Appendage	8.04855e-35	1.79756e-30
ENSG00000113319	ENSG00000113319:1	RASGRF2	0.4116	Heart_Left_Ventricle	8.04855e-35	1.79756e-30
ENSG00000113319	ENSG00000113319:1	RASGRF2	0.8716	Thyroid	8.04855e-35	1.79756e-30
ENSG00000113319	ENSG00000113319:1	RASGRF2	0.6925	Pancreas	8.04855e-35	1.79756e-30
ENSG00000113319	ENSG00000113319:1	RASGRF2	0.4839	Muscle_Skeletal	8.04855e-35	1.79756e-30
ENSG00000019144	ENSG00000019144:2	PHLDB1	0.2601	Thyroid	9.72508e-35	2.172e-30
ENSG00000019144	ENSG00000019144:1	PHLDB1	0.4519	Brain_Cerebellum	9.72508e-35	2.172e-30
ENSG00000019144	ENSG00000019144:1	PHLDB1	0.3796	Esophagus_Mucosa	9.72508e-35	2.172e-30
ENSG00000019144	ENSG00000019144:1	PHLDB1	0.4655	Pituitary	9.72508e-35	2.172e-30
ENSG00000019144	ENSG00000019144:1	PHLDB1	0.3528	Brain_Cerebellar_Hemisphere	9.72508e-35	2.172e-30
ENSG00000206503	ENSG00000206503:1	HLA-A	0.1382	Minor_Salivary_Gland	1.23623e-34	2.76099e-30
ENSG00000074696	ENSG00000074696:1	HACD3	0.1145	Colon_Transverse	2.66109e-34	5.94328e-30
ENSG00000074696	ENSG00000074696:1	HACD3	0.4376	Whole_Blood	2.66109e-34	5.94328e-30
ENSG00000123095	ENSG00000123095:1	BHLHE41	0.3821	Liver	1.31807e-33	2.94378e-29
ENSG00000123095	ENSG00000123095:1	BHLHE41	0.6654	Skin_Not_Sun_Exposed	1.31807e-33	2.94378e-29
ENSG00000123095	ENSG00000123095:1	BHLHE41	0.6532	Skin_Sun_Exposed	1.31807e-33	2.94378e-29
ENSG00000187492	ENSG00000187492:1	CDHR4	0.1253	Skin_Sun_Exposed	2.97884e-33	6.65295e-29
ENSG00000132510	ENSG00000132510:1	KDM6B	0.6088	Esophagus_Gastroesophageal_Junction	3.76964e-33	8.41912e-29
ENSG00000132510	ENSG00000132510:1	KDM6B	0.66	Brain_Cortex	3.76964e-33	8.41912e-29
ENSG00000132510	ENSG00000132510:1	KDM6B	0.5738	Artery_Aorta	3.76964e-33	8.41912e-29
ENSG00000132510	ENSG00000132510:1	KDM6B	0.653	Cells_Cultured_fibroblasts	3.76964e-33	8.41912e-29
ENSG00000132510	ENSG00000132510:1	KDM6B	0.6041	Whole_Blood	3.76964e-33	8.41912e-29
ENSG00000132510	ENSG00000132510:1	KDM6B	0.6302	Skin_Not_Sun_Exposed	3.76964e-33	8.41912e-29
ENSG00000132510	ENSG00000132510:1	KDM6B	0.1804	Brain_Anterior_cingulate_cortex_BA24	3.76964e-33	8.41912e-29
ENSG00000132510	ENSG00000132510:1	KDM6B	0.4908	Testis	3.76964e-33	8.41912e-29
ENSG00000132510	ENSG00000132510:1	KDM6B	0.586	Skin_Sun_Exposed	3.76964e-33	8.41912e-29
ENSG00000132510	ENSG00000132510:1	KDM6B	0.2176	Adipose_Visceral_Omentum	3.76964e-33	8.41912e-29
ENSG00000132510	ENSG00000132510:1	KDM6B	0.6532	Esophagus_Muscularis	3.76964e-33	8.41912e-29
ENSG00000132510	ENSG00000132510:2	KDM6B	0.3203	Breast_Mammary_Tissue	3.76964e-33	8.41912e-29
ENSG00000132510	ENSG00000132510:1	KDM6B	0.4935	Nerve_Tibial	3.76964e-33	8.41912e-29
ENSG00000132510	ENSG00000132510:1	KDM6B	0.4023	Colon_Sigmoid	3.76964e-33	8.41912e-29
ENSG00000132510	ENSG00000132510:1	KDM6B	0.5113	Thyroid	3.76964e-33	8.41912e-29
ENSG00000132510	ENSG00000132510:1	KDM6B	0.7287	Artery_Tibial	3.76964e-33	8.41912e-29
ENSG00000100216	ENSG00000100216:2	TOMM22	0.115	Colon_Sigmoid	5.31253e-33	1.1865e-28
ENSG00000100216	ENSG00000100216:1	TOMM22	0.109	Esophagus_Gastroesophageal_Junction	5.31253e-33	1.1865e-28
ENSG00000100216	ENSG00000100216:1	TOMM22	0.1369	Artery_Tibial	5.31253e-33	1.1865e-28
ENSG00000100216	ENSG00000100216:2	TOMM22	0.1313	Breast_Mammary_Tissue	5.31253e-33	1.1865e-28
ENSG00000100216	ENSG00000100216:1	TOMM22	0.1237	Lung	5.31253e-33	1.1865e-28
ENSG00000092607	ENSG00000092607:1	TBX15	0.8274	Lung	8.83279e-33	1.97272e-28
ENSG00000092607	ENSG00000092607:1	TBX15	0.3806	Breast_Mammary_Tissue	8.83279e-33	1.97272e-28
ENSG00000183011	ENSG00000183011:1	NAA38	0.2844	Brain_Frontal_Cortex_BA9	1.01928e-32	2.27646e-28
ENSG00000183011	ENSG00000183011:1	NAA38	0.7571	Cells_EBV-transformed_lymphocytes	1.01928e-32	2.27646e-28
ENSG00000183011	ENSG00000183011:1	NAA38	0.3857	Skin_Not_Sun_Exposed	1.01928e-32	2.27646e-28
ENSG00000183011	ENSG00000183011:1	NAA38	0.657	Esophagus_Mucosa	1.01928e-32	2.27646e-28
ENSG00000183011	ENSG00000183011:1	NAA38	0.7352	Small_Intestine_Terminal_Ileum	1.01928e-32	2.27646e-28
ENSG00000183011	ENSG00000183011:1	NAA38	0.7091	Colon_Sigmoid	1.01928e-32	2.27646e-28
ENSG00000183011	ENSG00000183011:1	NAA38	0.6988	Ovary	1.01928e-32	2.27646e-28
ENSG00000183011	ENSG00000183011:1	NAA38	0.7489	Thyroid	1.01928e-32	2.27646e-28
ENSG00000183011	ENSG00000183011:1	NAA38	0.6293	Brain_Hypothalamus	1.01928e-32	2.27646e-28
ENSG00000183011	ENSG00000183011:2	NAA38	0.1056	Brain_Putamen_basal_ganglia	1.01928e-32	2.27646e-28
ENSG00000183011	ENSG00000183011:2	NAA38	0.2855	Cells_Cultured_fibroblasts	1.01928e-32	2.27646e-28
ENSG00000183011	ENSG00000183011:2	NAA38	0.2184	Pancreas	1.01928e-32	2.27646e-28
ENSG00000183011	ENSG00000183011:1	NAA38	0.7791	Artery_Aorta	1.01928e-32	2.27646e-28
ENSG00000183011	ENSG00000183011:1	NAA38	0.8044	Artery_Tibial	1.01928e-32	2.27646e-28
ENSG00000183011	ENSG00000183011:1	NAA38	0.6969	Heart_Atrial_Appendage	1.01928e-32	2.27646e-28
ENSG00000183011	ENSG00000183011:2	NAA38	0.304	Lung	1.01928e-32	2.27646e-28
ENSG00000183011	ENSG00000183011:1	NAA38	0.7324	Breast_Mammary_Tissue	1.01928e-32	2.27646e-28
ENSG00000183011	ENSG00000183011:1	NAA38	0.7654	Nerve_Tibial	1.01928e-32	2.27646e-28
ENSG00000183011	ENSG00000183011:1	NAA38	0.3941	Brain_Nucleus_accumbens_basal_ganglia	1.01928e-32	2.27646e-28
ENSG00000183011	ENSG00000183011:1	NAA38	0.3994	Esophagus_Muscularis	1.01928e-32	2.27646e-28
ENSG00000183011	ENSG00000183011:1	NAA38	0.2843	Skin_Sun_Exposed	1.01928e-32	2.27646e-28
ENSG00000183011	ENSG00000183011:1	NAA38	0.6723	Adipose_Visceral_Omentum	1.01928e-32	2.27646e-28
ENSG00000183011	ENSG00000183011:1	NAA38	0.44	Brain_Cerebellar_Hemisphere	1.01928e-32	2.27646e-28
ENSG00000183011	ENSG00000183011:1	NAA38	0.7754	Esophagus_Gastroesophageal_Junction	1.01928e-32	2.27646e-28
ENSG00000183011	ENSG00000183011:1	NAA38	0.1002	Artery_Coronary	1.01928e-32	2.27646e-28
ENSG00000183011	ENSG00000183011:1	NAA38	0.781	Adipose_Subcutaneous	1.01928e-32	2.27646e-28
ENSG00000099194	ENSG00000099194:1	SCD	0.9997	Adipose_Subcutaneous	1.53263e-32	3.42297e-28
ENSG00000099194	ENSG00000099194:1	SCD	0.9937	Adipose_Visceral_Omentum	1.53263e-32	3.42297e-28
ENSG00000099194	ENSG00000099194:1	SCD	0.227	Nerve_Tibial	1.53263e-32	3.42297e-28
ENSG00000099194	ENSG00000099194:1	SCD	0.5378	Breast_Mammary_Tissue	1.53263e-32	3.42297e-28
ENSG00000170004	ENSG00000170004:1	CHD3	0.1037	Breast_Mammary_Tissue	5.60336e-32	1.25146e-27
ENSG00000170004	ENSG00000170004:2	CHD3	0.6693	Whole_Blood	5.60336e-32	1.25146e-27
ENSG00000140577	ENSG00000140577:1	CRTC3	0.1429	Esophagus_Muscularis	9.28972e-32	2.07477e-27
ENSG00000140577	ENSG00000140577:1	CRTC3	0.4641	Whole_Blood	9.28972e-32	2.07477e-27
ENSG00000140577	ENSG00000140577:2	CRTC3	0.187	Stomach	9.28972e-32	2.07477e-27
ENSG00000140577	ENSG00000140577:2	CRTC3	0.1175	Uterus	9.28972e-32	2.07477e-27
ENSG00000140577	ENSG00000140577:1	CRTC3	0.3603	Skin_Sun_Exposed	9.28972e-32	2.07477e-27
ENSG00000140577	ENSG00000140577:2	CRTC3	0.2981	Thyroid	9.28972e-32	2.07477e-27
ENSG00000140577	ENSG00000140577:1	CRTC3	0.1261	Brain_Nucleus_accumbens_basal_ganglia	9.28972e-32	2.07477e-27
ENSG00000140577	ENSG00000140577:1	CRTC3	0.3263	Colon_Transverse	9.28972e-32	2.07477e-27
ENSG00000140577	ENSG00000140577:1	CRTC3	0.2711	Esophagus_Gastroesophageal_Junction	9.28972e-32	2.07477e-27
ENSG00000140577	ENSG00000140577:1	CRTC3	0.1901	Colon_Sigmoid	9.28972e-32	2.07477e-27
ENSG00000140577	ENSG00000140577:1	CRTC3	0.4272	Skin_Not_Sun_Exposed	9.28972e-32	2.07477e-27
ENSG00000140577	ENSG00000140577:1	CRTC3	0.1004	Artery_Coronary	9.28972e-32	2.07477e-27
ENSG00000140577	ENSG00000140577:1	CRTC3	0.3727	Esophagus_Mucosa	9.28972e-32	2.07477e-27
ENSG00000140577	ENSG00000140577:1	CRTC3	0.3088	Ovary	9.28972e-32	2.07477e-27
ENSG00000140577	ENSG00000140577:1	CRTC3	0.2025	Spleen	9.28972e-32	2.07477e-27
ENSG00000140577	ENSG00000140577:1	CRTC3	0.222	Small_Intestine_Terminal_Ileum	9.28972e-32	2.07477e-27
ENSG00000182224	ENSG00000182224:1	CYB5D1	0.1168	Colon_Sigmoid	9.53106e-32	2.12867e-27
ENSG00000182224	ENSG00000182224:1	CYB5D1	0.2102	Vagina	9.53106e-32	2.12867e-27
ENSG00000182224	ENSG00000182224:1	CYB5D1	0.1945	Testis	9.53106e-32	2.12867e-27
ENSG00000182224	ENSG00000182224:1	CYB5D1	0.3563	Adipose_Subcutaneous	9.53106e-32	2.12867e-27
ENSG00000182224	ENSG00000182224:1	CYB5D1	0.1592	Brain_Cerebellum	9.53106e-32	2.12867e-27
ENSG00000182224	ENSG00000182224:2	CYB5D1	0.1193	Thyroid	9.53106e-32	2.12867e-27
ENSG00000182224	ENSG00000182224:1	CYB5D1	0.1847	Pancreas	9.53106e-32	2.12867e-27
ENSG00000100226	ENSG00000100226:1	GTPBP1	0.1061	Stomach	1.59269e-31	3.55711e-27
ENSG00000118094	ENSG00000118094:1	TREH	0.1711	Small_Intestine_Terminal_Ileum	1.74641e-31	3.90044e-27
ENSG00000100221	ENSG00000100221:1	JOSD1	0.1928	Skin_Sun_Exposed	3.33045e-31	7.43823e-27
ENSG00000100221	ENSG00000100221:1	JOSD1	0.1116	Stomach	3.33045e-31	7.43823e-27
ENSG00000100221	ENSG00000100221:1	JOSD1	0.1209	Cells_EBV-transformed_lymphocytes	3.33045e-31	7.43823e-27
ENSG00000100221	ENSG00000100221:1	JOSD1	0.1616	Muscle_Skeletal	3.33045e-31	7.43823e-27
ENSG00000100221	ENSG00000100221:1	JOSD1	0.1499	Lung	3.33045e-31	7.43823e-27
ENSG00000100221	ENSG00000100221:1	JOSD1	0.1214	Cells_Cultured_fibroblasts	3.33045e-31	7.43823e-27
ENSG00000100221	ENSG00000100221:1	JOSD1	0.1607	Skin_Not_Sun_Exposed	3.33045e-31	7.43823e-27
ENSG00000184949	ENSG00000184949:1	FAM227A	0.1217	Brain_Cerebellum	7.43349e-31	1.6602e-26
ENSG00000184949	ENSG00000184949:1	FAM227A	0.1644	Artery_Coronary	7.43349e-31	1.6602e-26
ENSG00000184949	ENSG00000184949:1	FAM227A	0.1038	Brain_Putamen_basal_ganglia	7.43349e-31	1.6602e-26
ENSG00000184949	ENSG00000184949:1	FAM227A	0.1733	Spleen	7.43349e-31	1.6602e-26
ENSG00000184949	ENSG00000184949:1	FAM227A	0.18	Vagina	7.43349e-31	1.6602e-26
ENSG00000184949	ENSG00000184949:1	FAM227A	0.1569	Muscle_Skeletal	7.43349e-31	1.6602e-26
ENSG00000184949	ENSG00000184949:1	FAM227A	0.1506	Cells_EBV-transformed_lymphocytes	7.43349e-31	1.6602e-26
ENSG00000184949	ENSG00000184949:1	FAM227A	0.1323	Brain_Frontal_Cortex_BA9	7.43349e-31	1.6602e-26
ENSG00000184949	ENSG00000184949:1	FAM227A	0.2706	Brain_Hypothalamus	7.43349e-31	1.6602e-26
ENSG00000184949	ENSG00000184949:1	FAM227A	0.1404	Esophagus_Mucosa	7.43349e-31	1.6602e-26
ENSG00000184949	ENSG00000184949:1	FAM227A	0.2092	Artery_Aorta	7.43349e-31	1.6602e-26
ENSG00000184949	ENSG00000184949:1	FAM227A	0.4054	Pituitary	7.43349e-31	1.6602e-26
ENSG00000184949	ENSG00000184949:1	FAM227A	0.1988	Lung	7.43349e-31	1.6602e-26
ENSG00000184949	ENSG00000184949:1	FAM227A	0.4994	Thyroid	7.43349e-31	1.6602e-26
ENSG00000184949	ENSG00000184949:1	FAM227A	0.2549	Artery_Tibial	7.43349e-31	1.6602e-26
ENSG00000184949	ENSG00000184949:1	FAM227A	0.1362	Brain_Substantia_nigra	7.43349e-31	1.6602e-26
ENSG00000184949	ENSG00000184949:1	FAM227A	0.1765	Esophagus_Muscularis	7.43349e-31	1.6602e-26
ENSG00000184949	ENSG00000184949:1	FAM227A	0.181	Brain_Amygdala	7.43349e-31	1.6602e-26
ENSG00000184949	ENSG00000184949:1	FAM227A	0.2005	Minor_Salivary_Gland	7.43349e-31	1.6602e-26
ENSG00000184949	ENSG00000184949:2	FAM227A	0.1654	Nerve_Tibial	7.43349e-31	1.6602e-26
ENSG00000184949	ENSG00000184949:1	FAM227A	0.1835	Prostate	7.43349e-31	1.6602e-26
ENSG00000184949	ENSG00000184949:1	FAM227A	0.1892	Colon_Sigmoid	7.43349e-31	1.6602e-26
ENSG00000184949	ENSG00000184949:1	FAM227A	0.2252	Adipose_Visceral_Omentum	7.43349e-31	1.6602e-26
ENSG00000184949	ENSG00000184949:1	FAM227A	0.4109	Small_Intestine_Terminal_Ileum	7.43349e-31	1.6602e-26
ENSG00000184949	ENSG00000184949:1	FAM227A	0.1784	Colon_Transverse	7.43349e-31	1.6602e-26
ENSG00000184949	ENSG00000184949:1	FAM227A	0.1148	Brain_Cerebellar_Hemisphere	7.43349e-31	1.6602e-26
ENSG00000184949	ENSG00000184949:1	FAM227A	0.163	Ovary	7.43349e-31	1.6602e-26
ENSG00000184949	ENSG00000184949:1	FAM227A	0.1869	Pancreas	7.43349e-31	1.6602e-26
ENSG00000184949	ENSG00000184949:1	FAM227A	0.4795	Esophagus_Gastroesophageal_Junction	7.43349e-31	1.6602e-26
ENSG00000184949	ENSG00000184949:1	FAM227A	0.5235	Brain_Cortex	7.43349e-31	1.6602e-26
ENSG00000184949	ENSG00000184949:1	FAM227A	0.1689	Adipose_Subcutaneous	7.43349e-31	1.6602e-26
ENSG00000184949	ENSG00000184949:1	FAM227A	0.2054	Stomach	7.43349e-31	1.6602e-26
ENSG00000184949	ENSG00000184949:1	FAM227A	0.1324	Uterus	7.43349e-31	1.6602e-26
ENSG00000184949	ENSG00000184949:1	FAM227A	0.1098	Testis	7.43349e-31	1.6602e-26
ENSG00000184949	ENSG00000184949:1	FAM227A	0.3827	Heart_Left_Ventricle	7.43349e-31	1.6602e-26
ENSG00000184949	ENSG00000184949:1	FAM227A	0.2062	Breast_Mammary_Tissue	7.43349e-31	1.6602e-26
ENSG00000167549	ENSG00000167549:1	CORO6	0.2294	Pituitary	1.21029e-30	2.70307e-26
ENSG00000167549	ENSG00000167549:1	CORO6	0.3065	Brain_Cerebellar_Hemisphere	1.21029e-30	2.70307e-26
ENSG00000167549	ENSG00000167549:1	CORO6	0.1715	Adrenal_Gland	1.21029e-30	2.70307e-26
ENSG00000100211	ENSG00000100211:2	CBY1	0.1395	Esophagus_Mucosa	1.38802e-30	3.10001e-26
ENSG00000100211	ENSG00000100211:1	CBY1	0.1006	Small_Intestine_Terminal_Ileum	1.38802e-30	3.10001e-26
ENSG00000100211	ENSG00000100211:1	CBY1	0.1862	Cells_EBV-transformed_lymphocytes	1.38802e-30	3.10001e-26
ENSG00000100211	ENSG00000100211:1	CBY1	0.2381	Liver	1.38802e-30	3.10001e-26
ENSG00000100211	ENSG00000100211:1	CBY1	0.1432	Brain_Frontal_Cortex_BA9	1.38802e-30	3.10001e-26
ENSG00000100211	ENSG00000100211:1	CBY1	0.2184	Pancreas	1.38802e-30	3.10001e-26
ENSG00000100211	ENSG00000100211:2	CBY1	0.1072	Brain_Hypothalamus	1.38802e-30	3.10001e-26
ENSG00000100211	ENSG00000100211:1	CBY1	0.1975	Adrenal_Gland	1.38802e-30	3.10001e-26
ENSG00000100211	ENSG00000100211:1	CBY1	0.1479	Brain_Spinal_cord_cervical_c-1	1.38802e-30	3.10001e-26
ENSG00000100211	ENSG00000100211:1	CBY1	0.254	Ovary	1.38802e-30	3.10001e-26
ENSG00000100211	ENSG00000100211:1	CBY1	0.1662	Cells_Cultured_fibroblasts	1.38802e-30	3.10001e-26
ENSG00000100211	ENSG00000100211:1	CBY1	0.1938	Pituitary	1.38802e-30	3.10001e-26
ENSG00000100211	ENSG00000100211:1	CBY1	0.1764	Adipose_Subcutaneous	1.38802e-30	3.10001e-26
ENSG00000100211	ENSG00000100211:1	CBY1	0.5815	Colon_Sigmoid	1.38802e-30	3.10001e-26
ENSG00000100211	ENSG00000100211:1	CBY1	0.2118	Muscle_Skeletal	1.38802e-30	3.10001e-26
ENSG00000100211	ENSG00000100211:1	CBY1	0.1216	Uterus	1.38802e-30	3.10001e-26
ENSG00000100211	ENSG00000100211:2	CBY1	0.1149	Vagina	1.38802e-30	3.10001e-26
ENSG00000100211	ENSG00000100211:1	CBY1	0.1127	Skin_Not_Sun_Exposed	1.38802e-30	3.10001e-26
ENSG00000107669	ENSG00000107669:3	ATE1	0.2091	Adipose_Subcutaneous	1.6737e-29	3.73804e-25
ENSG00000107669	ENSG00000107669:2	ATE1	0.6968	Whole_Blood	1.6737e-29	3.73804e-25
ENSG00000107669	ENSG00000107669:1	ATE1	0.1233	Brain_Hippocampus	1.6737e-29	3.73804e-25
ENSG00000107669	ENSG00000107669:1	ATE1	0.3288	Heart_Atrial_Appendage	1.6737e-29	3.73804e-25
ENSG00000107669	ENSG00000107669:2	ATE1	0.55	Esophagus_Gastroesophageal_Junction	1.6737e-29	3.73804e-25
ENSG00000107669	ENSG00000107669:1	ATE1	0.413	Heart_Left_Ventricle	1.6737e-29	3.73804e-25
ENSG00000107669	ENSG00000107669:2	ATE1	0.3615	Adipose_Visceral_Omentum	1.6737e-29	3.73804e-25
ENSG00000107669	ENSG00000107669:2	ATE1	0.2953	Artery_Coronary	1.6737e-29	3.73804e-25
ENSG00000107669	ENSG00000107669:1	ATE1	0.3263	Testis	1.6737e-29	3.73804e-25
ENSG00000107669	ENSG00000107669:2	ATE1	0.4308	Artery_Tibial	1.6737e-29	3.73804e-25
ENSG00000107669	ENSG00000107669:2	ATE1	0.2416	Esophagus_Muscularis	1.6737e-29	3.73804e-25
ENSG00000107669	ENSG00000107669:2	ATE1	0.1713	Ovary	1.6737e-29	3.73804e-25
ENSG00000107669	ENSG00000107669:1	ATE1	0.3583	Muscle_Skeletal	1.6737e-29	3.73804e-25
ENSG00000100201	ENSG00000100201:1	DDX17	0.1051	Esophagus_Muscularis	2.19268e-29	4.89713e-25
ENSG00000151292	ENSG00000151292:1	CSNK1G3	0.3535	Cells_Cultured_fibroblasts	2.62442e-29	5.86137e-25
ENSG00000151292	ENSG00000151292:1	CSNK1G3	0.399	Brain_Anterior_cingulate_cortex_BA24	2.62442e-29	5.86137e-25
ENSG00000151292	ENSG00000151292:2	CSNK1G3	0.1211	Lung	2.62442e-29	5.86137e-25
ENSG00000151292	ENSG00000151292:1	CSNK1G3	0.5926	Brain_Nucleus_accumbens_basal_ganglia	2.62442e-29	5.86137e-25
ENSG00000151292	ENSG00000151292:1	CSNK1G3	0.104	Adipose_Subcutaneous	2.62442e-29	5.86137e-25
ENSG00000151292	ENSG00000151292:1	CSNK1G3	0.1623	Brain_Putamen_basal_ganglia	2.62442e-29	5.86137e-25
ENSG00000151292	ENSG00000151292:2	CSNK1G3	0.1497	Brain_Hypothalamus	2.62442e-29	5.86137e-25
ENSG00000151292	ENSG00000151292:1	CSNK1G3	0.1324	Nerve_Tibial	2.62442e-29	5.86137e-25
ENSG00000151292	ENSG00000151292:1	CSNK1G3	0.1773	Thyroid	2.62442e-29	5.86137e-25
ENSG00000151292	ENSG00000151292:2	CSNK1G3	0.2209	Artery_Tibial	2.62442e-29	5.86137e-25
ENSG00000151292	ENSG00000151292:1	CSNK1G3	0.5286	Testis	2.62442e-29	5.86137e-25
ENSG00000116809	ENSG00000116809:1	ZBTB17	0.1663	Adipose_Visceral_Omentum	3.98951e-28	8.91017e-24
ENSG00000166452	ENSG00000166452:3	AKIP1	0.1756	Esophagus_Mucosa	3.22667e-27	7.20645e-23
ENSG00000166452	ENSG00000166452:1	AKIP1	0.422	Brain_Putamen_basal_ganglia	3.22667e-27	7.20645e-23
ENSG00000166452	ENSG00000166452:1	AKIP1	0.2931	Esophagus_Gastroesophageal_Junction	3.22667e-27	7.20645e-23
ENSG00000166452	ENSG00000166452:2	AKIP1	0.2019	Testis	3.22667e-27	7.20645e-23
ENSG00000166452	ENSG00000166452:2	AKIP1	0.2909	Cells_Cultured_fibroblasts	3.22667e-27	7.20645e-23
ENSG00000204160	ENSG00000204160:1	ZDHHC18	0.1563	Skin_Sun_Exposed	4.73515e-27	1.05755e-22
ENSG00000103335	ENSG00000103335:2	PIEZO1	0.4256	Lung	9.18288e-27	2.0509e-22
ENSG00000088298	ENSG00000088298:1	EDEM2	0.1273	Muscle_Skeletal	1.06073e-26	2.36902e-22
ENSG00000088298	ENSG00000088298:1	EDEM2	0.1708	Brain_Nucleus_accumbens_basal_ganglia	1.06073e-26	2.36902e-22
ENSG00000101000	ENSG00000101000:1	PROCR	0.1739	Artery_Aorta	1.21195e-26	2.70678e-22
ENSG00000078814	ENSG00000078814:1	MYH7B	0.322	Esophagus_Mucosa	1.55251e-26	3.46738e-22
ENSG00000078814	ENSG00000078814:1	MYH7B	0.3121	Artery_Tibial	1.55251e-26	3.46738e-22
ENSG00000078814	ENSG00000078814:1	MYH7B	0.2355	Lung	1.55251e-26	3.46738e-22
ENSG00000078814	ENSG00000078814:1	MYH7B	0.2918	Liver	1.55251e-26	3.46738e-22
ENSG00000078814	ENSG00000078814:1	MYH7B	0.1909	Pancreas	1.55251e-26	3.46738e-22
ENSG00000078814	ENSG00000078814:1	MYH7B	0.1563	Adrenal_Gland	1.55251e-26	3.46738e-22
ENSG00000078814	ENSG00000078814:1	MYH7B	0.3108	Spleen	1.55251e-26	3.46738e-22
ENSG00000078814	ENSG00000078814:1	MYH7B	0.1764	Artery_Coronary	1.55251e-26	3.46738e-22
ENSG00000078814	ENSG00000078814:1	MYH7B	0.1256	Brain_Cerebellar_Hemisphere	1.55251e-26	3.46738e-22
ENSG00000078814	ENSG00000078814:1	MYH7B	0.231	Brain_Cerebellum	1.55251e-26	3.46738e-22
ENSG00000078814	ENSG00000078814:1	MYH7B	0.2977	Skin_Not_Sun_Exposed	1.55251e-26	3.46738e-22
ENSG00000078814	ENSG00000078814:1	MYH7B	0.3166	Adipose_Subcutaneous	1.55251e-26	3.46738e-22
ENSG00000078814	ENSG00000078814:1	MYH7B	0.2668	Adipose_Visceral_Omentum	1.55251e-26	3.46738e-22
ENSG00000078814	ENSG00000078814:1	MYH7B	0.1977	Esophagus_Muscularis	1.55251e-26	3.46738e-22
ENSG00000078814	ENSG00000078814:1	MYH7B	0.3234	Whole_Blood	1.55251e-26	3.46738e-22
ENSG00000078814	ENSG00000078814:1	MYH7B	0.2718	Pituitary	1.55251e-26	3.46738e-22
ENSG00000078814	ENSG00000078814:1	MYH7B	0.3464	Cells_Cultured_fibroblasts	1.55251e-26	3.46738e-22
ENSG00000078814	ENSG00000078814:1	MYH7B	0.2792	Nerve_Tibial	1.55251e-26	3.46738e-22
ENSG00000078814	ENSG00000078814:1	MYH7B	0.2194	Colon_Sigmoid	1.55251e-26	3.46738e-22
ENSG00000078814	ENSG00000078814:1	MYH7B	0.255	Breast_Mammary_Tissue	1.55251e-26	3.46738e-22
ENSG00000078814	ENSG00000078814:1	MYH7B	0.3055	Artery_Aorta	1.55251e-26	3.46738e-22
ENSG00000078814	ENSG00000078814:1	MYH7B	0.308	Thyroid	1.55251e-26	3.46738e-22
ENSG00000078814	ENSG00000078814:1	MYH7B	0.2419	Esophagus_Gastroesophageal_Junction	1.55251e-26	3.46738e-22
ENSG00000078814	ENSG00000078814:1	MYH7B	0.1946	Small_Intestine_Terminal_Ileum	1.55251e-26	3.46738e-22
ENSG00000078814	ENSG00000078814:1	MYH7B	0.2691	Stomach	1.55251e-26	3.46738e-22
ENSG00000078814	ENSG00000078814:1	MYH7B	0.1774	Skin_Sun_Exposed	1.55251e-26	3.46738e-22
ENSG00000213639	ENSG00000213639:2	PPP1CB	0.1155	Heart_Left_Ventricle	1.7652e-26	3.9424e-22
ENSG00000213639	ENSG00000213639:1	PPP1CB	0.1471	Cells_EBV-transformed_lymphocytes	1.7652e-26	3.9424e-22
ENSG00000011028	ENSG00000011028:1	MRC2	0.9746	Cells_Cultured_fibroblasts	1.81487e-26	4.05334e-22
ENSG00000011028	ENSG00000011028:4	MRC2	0.723	Skin_Not_Sun_Exposed	1.81487e-26	4.05334e-22
ENSG00000011028	ENSG00000011028:2	MRC2	0.305	Ovary	1.81487e-26	4.05334e-22
ENSG00000011028	ENSG00000011028:1	MRC2	0.1999	Brain_Nucleus_accumbens_basal_ganglia	1.81487e-26	4.05334e-22
ENSG00000011028	ENSG00000011028:3	MRC2	0.3691	Esophagus_Mucosa	1.81487e-26	4.05334e-22
ENSG00000011028	ENSG00000011028:1	MRC2	0.4252	Stomach	1.81487e-26	4.05334e-22
ENSG00000011028	ENSG00000011028:1	MRC2	0.4192	Esophagus_Gastroesophageal_Junction	1.81487e-26	4.05334e-22
ENSG00000011028	ENSG00000011028:1	MRC2	0.4029	Adipose_Subcutaneous	1.81487e-26	4.05334e-22
ENSG00000011028	ENSG00000011028:1	MRC2	0.9605	Thyroid	1.81487e-26	4.05334e-22
ENSG00000011028	ENSG00000011028:1	MRC2	0.704	Pituitary	1.81487e-26	4.05334e-22
ENSG00000011028	ENSG00000011028:1	MRC2	0.9767	Lung	1.81487e-26	4.05334e-22
ENSG00000011028	ENSG00000011028:1	MRC2	0.3909	Skin_Sun_Exposed	1.81487e-26	4.05334e-22
ENSG00000011028	ENSG00000011028:1	MRC2	0.978	Adrenal_Gland	1.81487e-26	4.05334e-22
ENSG00000011028	ENSG00000011028:1	MRC2	0.9184	Prostate	1.81487e-26	4.05334e-22
ENSG00000011028	ENSG00000011028:1	MRC2	0.4036	Nerve_Tibial	1.81487e-26	4.05334e-22
ENSG00000011028	ENSG00000011028:2	MRC2	0.371	Artery_Tibial	1.81487e-26	4.05334e-22
ENSG00000011028	ENSG00000011028:1	MRC2	0.3502	Brain_Caudate_basal_ganglia	1.81487e-26	4.05334e-22
ENSG00000011028	ENSG00000011028:1	MRC2	0.3875	Colon_Transverse	1.81487e-26	4.05334e-22
ENSG00000011028	ENSG00000011028:2	MRC2	0.438	Cells_Cultured_fibroblasts	1.81487e-26	4.05334e-22
ENSG00000011028	ENSG00000011028:1	MRC2	0.4557	Breast_Mammary_Tissue	1.81487e-26	4.05334e-22
ENSG00000011028	ENSG00000011028:1	MRC2	0.3354	Adipose_Visceral_Omentum	1.81487e-26	4.05334e-22
ENSG00000011028	ENSG00000011028:1	MRC2	0.4313	Testis	1.81487e-26	4.05334e-22
ENSG00000011028	ENSG00000011028:1	MRC2	0.6573	Colon_Sigmoid	1.81487e-26	4.05334e-22
ENSG00000011028	ENSG00000011028:1	MRC2	0.6012	Heart_Atrial_Appendage	1.81487e-26	4.05334e-22
ENSG00000011028	ENSG00000011028:2	MRC2	0.2495	Adipose_Visceral_Omentum	1.81487e-26	4.05334e-22
ENSG00000011028	ENSG00000011028:1	MRC2	0.4042	Esophagus_Muscularis	1.81487e-26	4.05334e-22
ENSG00000011028	ENSG00000011028:1	MRC2	0.9471	Artery_Aorta	1.81487e-26	4.05334e-22
ENSG00000011028	ENSG00000011028:1	MRC2	0.2038	Spleen	1.81487e-26	4.05334e-22
ENSG00000171132	ENSG00000171132:1	PRKCE	0.5405	Skin_Not_Sun_Exposed	1.93661e-26	4.32523e-22
ENSG00000171132	ENSG00000171132:1	PRKCE	0.2004	Brain_Cortex	1.93661e-26	4.32523e-22
ENSG00000171132	ENSG00000171132:1	PRKCE	0.1905	Uterus	1.93661e-26	4.32523e-22
ENSG00000171132	ENSG00000171132:1	PRKCE	0.806	Whole_Blood	1.93661e-26	4.32523e-22
ENSG00000171132	ENSG00000171132:1	PRKCE	0.26	Vagina	1.93661e-26	4.32523e-22
ENSG00000171132	ENSG00000171132:1	PRKCE	0.1226	Artery_Tibial	1.93661e-26	4.32523e-22
ENSG00000171132	ENSG00000171132:1	PRKCE	0.7186	Cells_Cultured_fibroblasts	1.93661e-26	4.32523e-22
ENSG00000185950	ENSG00000185950:1	IRS2	0.3519	Muscle_Skeletal	5.06917e-26	1.13215e-21
ENSG00000183386	ENSG00000183386:1	FHL3	0.3795	Colon_Sigmoid	7.57198e-26	1.69113e-21
ENSG00000183386	ENSG00000183386:1	FHL3	0.9339	Esophagus_Mucosa	7.57198e-26	1.69113e-21
ENSG00000183386	ENSG00000183386:1	FHL3	0.9326	Heart_Atrial_Appendage	7.57198e-26	1.69113e-21
ENSG00000183386	ENSG00000183386:1	FHL3	0.4014	Colon_Transverse	7.57198e-26	1.69113e-21
ENSG00000183386	ENSG00000183386:1	FHL3	0.9542	Spleen	7.57198e-26	1.69113e-21
ENSG00000183386	ENSG00000183386:1	FHL3	0.9409	Skin_Sun_Exposed	7.57198e-26	1.69113e-21
ENSG00000183386	ENSG00000183386:1	FHL3	0.2949	Brain_Hypothalamus	7.57198e-26	1.69113e-21
ENSG00000183386	ENSG00000183386:1	FHL3	0.9455	Pancreas	7.57198e-26	1.69113e-21
ENSG00000183386	ENSG00000183386:1	FHL3	0.1477	Uterus	7.57198e-26	1.69113e-21
ENSG00000183386	ENSG00000183386:1	FHL3	0.9274	Adipose_Visceral_Omentum	7.57198e-26	1.69113e-21
ENSG00000183386	ENSG00000183386:1	FHL3	0.9467	Pituitary	7.57198e-26	1.69113e-21
ENSG00000183386	ENSG00000183386:1	FHL3	0.9309	Breast_Mammary_Tissue	7.57198e-26	1.69113e-21
ENSG00000183386	ENSG00000183386:1	FHL3	0.9305	Heart_Left_Ventricle	7.57198e-26	1.69113e-21
ENSG00000183386	ENSG00000183386:1	FHL3	0.9659	Stomach	7.57198e-26	1.69113e-21
ENSG00000183386	ENSG00000183386:1	FHL3	0.9542	Artery_Tibial	7.57198e-26	1.69113e-21
ENSG00000183386	ENSG00000183386:1	FHL3	0.9506	Artery_Aorta	7.57198e-26	1.69113e-21
ENSG00000183386	ENSG00000183386:2	FHL3	0.8333	Whole_Blood	7.57198e-26	1.69113e-21
ENSG00000183386	ENSG00000183386:1	FHL3	0.1193	Cells_EBV-transformed_lymphocytes	7.57198e-26	1.69113e-21
ENSG00000183386	ENSG00000183386:1	FHL3	0.8599	Ovary	7.57198e-26	1.69113e-21
ENSG00000183386	ENSG00000183386:1	FHL3	0.9421	Nerve_Tibial	7.57198e-26	1.69113e-21
ENSG00000183386	ENSG00000183386:1	FHL3	0.9072	Esophagus_Muscularis	7.57198e-26	1.69113e-21
ENSG00000183386	ENSG00000183386:1	FHL3	0.4895	Vagina	7.57198e-26	1.69113e-21
ENSG00000183386	ENSG00000183386:1	FHL3	0.9309	Thyroid	7.57198e-26	1.69113e-21
ENSG00000183386	ENSG00000183386:1	FHL3	0.9465	Esophagus_Gastroesophageal_Junction	7.57198e-26	1.69113e-21
ENSG00000183386	ENSG00000183386:1	FHL3	0.1942	Brain_Caudate_basal_ganglia	7.57198e-26	1.69113e-21
ENSG00000183386	ENSG00000183386:1	FHL3	0.978	Cells_Cultured_fibroblasts	7.57198e-26	1.69113e-21
ENSG00000183386	ENSG00000183386:1	FHL3	0.943	Skin_Not_Sun_Exposed	7.57198e-26	1.69113e-21
ENSG00000183386	ENSG00000183386:1	FHL3	0.4625	Artery_Coronary	7.57198e-26	1.69113e-21
ENSG00000183386	ENSG00000183386:1	FHL3	0.9481	Lung	7.57198e-26	1.69113e-21
ENSG00000183386	ENSG00000183386:1	FHL3	0.939	Adipose_Subcutaneous	7.57198e-26	1.69113e-21
ENSG00000183386	ENSG00000183386:1	FHL3	0.6709	Prostate	7.57198e-26	1.69113e-21
ENSG00000183386	ENSG00000183386:1	FHL3	0.5155	Kidney_Cortex	7.57198e-26	1.69113e-21
ENSG00000183386	ENSG00000183386:1	FHL3	0.9193	Small_Intestine_Terminal_Ileum	7.57198e-26	1.69113e-21
ENSG00000183386	ENSG00000183386:1	FHL3	0.9477	Adrenal_Gland	7.57198e-26	1.69113e-21
ENSG00000151612	ENSG00000151612:2	ZNF827	0.1939	Skin_Not_Sun_Exposed	2.52364e-25	5.6363e-21
ENSG00000151612	ENSG00000151612:3	ZNF827	0.5972	Artery_Tibial	2.52364e-25	5.6363e-21
ENSG00000151612	ENSG00000151612:2	ZNF827	0.1634	Artery_Aorta	2.52364e-25	5.6363e-21
ENSG00000151612	ENSG00000151612:1	ZNF827	0.8365	Cells_Cultured_fibroblasts	2.52364e-25	5.6363e-21
ENSG00000197548	ENSG00000197548:1	ATG7	0.1456	Pituitary	3.5922e-25	8.02282e-21
ENSG00000197548	ENSG00000197548:2	ATG7	0.5281	Adipose_Visceral_Omentum	3.5922e-25	8.02282e-21
ENSG00000197548	ENSG00000197548:3	ATG7	0.2851	Heart_Left_Ventricle	3.5922e-25	8.02282e-21
ENSG00000197548	ENSG00000197548:1	ATG7	0.284	Testis	3.5922e-25	8.02282e-21
ENSG00000197548	ENSG00000197548:2	ATG7	0.5433	Spleen	3.5922e-25	8.02282e-21
ENSG00000197548	ENSG00000197548:1	ATG7	0.3703	Liver	3.5922e-25	8.02282e-21
ENSG00000197548	ENSG00000197548:4	ATG7	0.5523	Artery_Aorta	3.5922e-25	8.02282e-21
ENSG00000197548	ENSG00000197548:1	ATG7	0.5436	Prostate	3.5922e-25	8.02282e-21
ENSG00000197548	ENSG00000197548:2	ATG7	0.4891	Esophagus_Mucosa	3.5922e-25	8.02282e-21
ENSG00000197548	ENSG00000197548:1	ATG7	0.1845	Kidney_Cortex	3.5922e-25	8.02282e-21
ENSG00000183431	ENSG00000183431:1	SF3A3	0.1585	Breast_Mammary_Tissue	5.19318e-25	1.15985e-20
ENSG00000183431	ENSG00000183431:1	SF3A3	0.1321	Minor_Salivary_Gland	5.19318e-25	1.15985e-20
ENSG00000183431	ENSG00000183431:1	SF3A3	0.1383	Prostate	5.19318e-25	1.15985e-20
ENSG00000183431	ENSG00000183431:1	SF3A3	0.1511	Artery_Aorta	5.19318e-25	1.15985e-20
ENSG00000183431	ENSG00000183431:1	SF3A3	0.5685	Cells_EBV-transformed_lymphocytes	5.19318e-25	1.15985e-20
ENSG00000183431	ENSG00000183431:1	SF3A3	0.1109	Esophagus_Muscularis	5.19318e-25	1.15985e-20
ENSG00000183431	ENSG00000183431:1	SF3A3	0.3778	Brain_Hippocampus	5.19318e-25	1.15985e-20
ENSG00000183431	ENSG00000183431:1	SF3A3	0.2144	Adrenal_Gland	5.19318e-25	1.15985e-20
ENSG00000183431	ENSG00000183431:1	SF3A3	0.1313	Colon_Sigmoid	5.19318e-25	1.15985e-20
ENSG00000183431	ENSG00000183431:1	SF3A3	0.291	Liver	5.19318e-25	1.15985e-20
ENSG00000183431	ENSG00000183431:2	SF3A3	0.1007	Skin_Sun_Exposed	5.19318e-25	1.15985e-20
ENSG00000183431	ENSG00000183431:1	SF3A3	0.2258	Small_Intestine_Terminal_Ileum	5.19318e-25	1.15985e-20
ENSG00000183431	ENSG00000183431:1	SF3A3	0.8546	Brain_Putamen_basal_ganglia	5.19318e-25	1.15985e-20
ENSG00000183431	ENSG00000183431:1	SF3A3	0.1408	Spleen	5.19318e-25	1.15985e-20
ENSG00000183431	ENSG00000183431:1	SF3A3	0.1401	Stomach	5.19318e-25	1.15985e-20
ENSG00000183431	ENSG00000183431:2	SF3A3	0.1552	Whole_Blood	5.19318e-25	1.15985e-20
ENSG00000183431	ENSG00000183431:1	SF3A3	0.1124	Testis	5.19318e-25	1.15985e-20
ENSG00000183431	ENSG00000183431:1	SF3A3	0.1116	Artery_Coronary	5.19318e-25	1.15985e-20
ENSG00000183431	ENSG00000183431:1	SF3A3	0.1056	Cells_Cultured_fibroblasts	5.19318e-25	1.15985e-20
ENSG00000183431	ENSG00000183431:1	SF3A3	0.147	Adipose_Visceral_Omentum	5.19318e-25	1.15985e-20
ENSG00000183431	ENSG00000183431:1	SF3A3	0.1031	Pituitary	5.19318e-25	1.15985e-20
ENSG00000183431	ENSG00000183431:2	SF3A3	0.8008	Esophagus_Mucosa	5.19318e-25	1.15985e-20
ENSG00000183431	ENSG00000183431:1	SF3A3	0.1132	Vagina	5.19318e-25	1.15985e-20
ENSG00000198945	ENSG00000198945:1	L3MBTL3	0.1058	Heart_Left_Ventricle	5.23959e-25	1.17021e-20
ENSG00000198945	ENSG00000198945:1	L3MBTL3	0.1143	Vagina	5.23959e-25	1.17021e-20
ENSG00000166444	ENSG00000166444:1	ST5	0.3676	Cells_EBV-transformed_lymphocytes	5.94093e-25	1.32685e-20
ENSG00000185340	ENSG00000185340:1	GAS2L1	0.915	Cells_Cultured_fibroblasts	9.31095e-25	2.07951e-20
ENSG00000185340	ENSG00000185340:1	GAS2L1	0.6454	Spleen	9.31095e-25	2.07951e-20
ENSG00000185340	ENSG00000185340:3	GAS2L1	0.5672	Artery_Tibial	9.31095e-25	2.07951e-20
ENSG00000185340	ENSG00000185340:1	GAS2L1	0.1239	Heart_Left_Ventricle	9.31095e-25	2.07951e-20
ENSG00000122870	ENSG00000122870:1	BICC1	0.2328	Brain_Amygdala	1.03695e-24	2.31593e-20
ENSG00000122870	ENSG00000122870:1	BICC1	0.1369	Heart_Atrial_Appendage	1.03695e-24	2.31593e-20
ENSG00000122870	ENSG00000122870:1	BICC1	0.2256	Brain_Cortex	1.03695e-24	2.31593e-20
ENSG00000122870	ENSG00000122870:2	BICC1	0.2479	Esophagus_Gastroesophageal_Junction	1.03695e-24	2.31593e-20
ENSG00000122870	ENSG00000122870:1	BICC1	0.1786	Brain_Anterior_cingulate_cortex_BA24	1.03695e-24	2.31593e-20
ENSG00000122870	ENSG00000122870:2	BICC1	0.1941	Skin_Sun_Exposed	1.03695e-24	2.31593e-20
ENSG00000122870	ENSG00000122870:2	BICC1	0.2528	Artery_Tibial	1.03695e-24	2.31593e-20
ENSG00000122870	ENSG00000122870:1	BICC1	0.1004	Brain_Nucleus_accumbens_basal_ganglia	1.03695e-24	2.31593e-20
ENSG00000122870	ENSG00000122870:1	BICC1	0.1235	Adipose_Visceral_Omentum	1.03695e-24	2.31593e-20
ENSG00000122870	ENSG00000122870:1	BICC1	0.2061	Brain_Caudate_basal_ganglia	1.03695e-24	2.31593e-20
ENSG00000122870	ENSG00000122870:2	BICC1	0.2035	Thyroid	1.03695e-24	2.31593e-20
ENSG00000122870	ENSG00000122870:1	BICC1	0.1737	Brain_Frontal_Cortex_BA9	1.03695e-24	2.31593e-20
ENSG00000122870	ENSG00000122870:2	BICC1	0.1026	Esophagus_Mucosa	1.03695e-24	2.31593e-20
ENSG00000122870	ENSG00000122870:2	BICC1	0.3237	Colon_Sigmoid	1.03695e-24	2.31593e-20
ENSG00000122870	ENSG00000122870:2	BICC1	0.2153	Artery_Coronary	1.03695e-24	2.31593e-20
ENSG00000122870	ENSG00000122870:2	BICC1	0.1061	Brain_Substantia_nigra	1.03695e-24	2.31593e-20
ENSG00000122870	ENSG00000122870:1	BICC1	0.2414	Brain_Putamen_basal_ganglia	1.03695e-24	2.31593e-20
ENSG00000122870	ENSG00000122870:2	BICC1	0.1438	Skin_Not_Sun_Exposed	1.03695e-24	2.31593e-20
ENSG00000122870	ENSG00000122870:1	BICC1	0.2364	Colon_Transverse	1.03695e-24	2.31593e-20
ENSG00000122870	ENSG00000122870:2	BICC1	0.2467	Artery_Aorta	1.03695e-24	2.31593e-20
ENSG00000122870	ENSG00000122870:1	BICC1	0.1206	Prostate	1.03695e-24	2.31593e-20
ENSG00000122870	ENSG00000122870:1	BICC1	0.1865	Heart_Left_Ventricle	1.03695e-24	2.31593e-20
ENSG00000122870	ENSG00000122870:1	BICC1	0.158	Small_Intestine_Terminal_Ileum	1.03695e-24	2.31593e-20
ENSG00000122870	ENSG00000122870:2	BICC1	0.1072	Breast_Mammary_Tissue	1.03695e-24	2.31593e-20
ENSG00000122870	ENSG00000122870:2	BICC1	0.1943	Esophagus_Muscularis	1.03695e-24	2.31593e-20
ENSG00000122870	ENSG00000122870:2	BICC1	0.2259	Muscle_Skeletal	1.03695e-24	2.31593e-20
ENSG00000122870	ENSG00000122870:1	BICC1	0.1581	Lung	1.03695e-24	2.31593e-20
ENSG00000120594	ENSG00000120594:1	PLXDC2	0.1196	Pancreas	1.14065e-24	2.54752e-20
ENSG00000131242	ENSG00000131242:1	RAB11FIP4	0.7681	Thyroid	1.27379e-24	2.84488e-20
ENSG00000066248	ENSG00000066248:1	NGEF	0.7702	Adipose_Subcutaneous	1.51777e-24	3.38979e-20
ENSG00000066248	ENSG00000066248:1	NGEF	0.7742	Cells_Cultured_fibroblasts	1.51777e-24	3.38979e-20
ENSG00000066248	ENSG00000066248:1	NGEF	0.6107	Thyroid	1.51777e-24	3.38979e-20
ENSG00000066248	ENSG00000066248:1	NGEF	0.5496	Lung	1.51777e-24	3.38979e-20
ENSG00000066248	ENSG00000066248:1	NGEF	0.819	Esophagus_Mucosa	1.51777e-24	3.38979e-20
ENSG00000066248	ENSG00000066248:1	NGEF	0.8124	Esophagus_Muscularis	1.51777e-24	3.38979e-20
ENSG00000066248	ENSG00000066248:1	NGEF	0.8651	Artery_Aorta	1.51777e-24	3.38979e-20
ENSG00000066248	ENSG00000066248:1	NGEF	0.1574	Small_Intestine_Terminal_Ileum	1.51777e-24	3.38979e-20
ENSG00000066248	ENSG00000066248:1	NGEF	0.7517	Esophagus_Gastroesophageal_Junction	1.51777e-24	3.38979e-20
ENSG00000066248	ENSG00000066248:1	NGEF	0.8092	Heart_Left_Ventricle	1.51777e-24	3.38979e-20
ENSG00000066248	ENSG00000066248:1	NGEF	0.7956	Artery_Coronary	1.51777e-24	3.38979e-20
ENSG00000066248	ENSG00000066248:1	NGEF	0.6351	Vagina	1.51777e-24	3.38979e-20
ENSG00000066248	ENSG00000066248:1	NGEF	0.5624	Skin_Sun_Exposed	1.51777e-24	3.38979e-20
ENSG00000066248	ENSG00000066248:1	NGEF	0.5286	Heart_Atrial_Appendage	1.51777e-24	3.38979e-20
ENSG00000066248	ENSG00000066248:1	NGEF	0.6355	Minor_Salivary_Gland	1.51777e-24	3.38979e-20
ENSG00000066248	ENSG00000066248:1	NGEF	0.2222	Prostate	1.51777e-24	3.38979e-20
ENSG00000066248	ENSG00000066248:1	NGEF	0.707	Skin_Not_Sun_Exposed	1.51777e-24	3.38979e-20
ENSG00000066248	ENSG00000066248:1	NGEF	0.4177	Brain_Hypothalamus	1.51777e-24	3.38979e-20
ENSG00000066248	ENSG00000066248:1	NGEF	0.1553	Stomach	1.51777e-24	3.38979e-20
ENSG00000066248	ENSG00000066248:1	NGEF	0.8374	Artery_Tibial	1.51777e-24	3.38979e-20
ENSG00000066248	ENSG00000066248:1	NGEF	0.7756	Spleen	1.51777e-24	3.38979e-20
ENSG00000066248	ENSG00000066248:1	NGEF	0.7109	Adipose_Visceral_Omentum	1.51777e-24	3.38979e-20
ENSG00000066248	ENSG00000066248:1	NGEF	0.8136	Colon_Sigmoid	1.51777e-24	3.38979e-20
ENSG00000070018	ENSG00000070018:1	LRP6	0.2737	Brain_Frontal_Cortex_BA9	2.98793e-24	6.67324e-20
ENSG00000070018	ENSG00000070018:1	LRP6	0.1452	Brain_Spinal_cord_cervical_c-1	2.98793e-24	6.67324e-20
ENSG00000070018	ENSG00000070018:1	LRP6	0.1103	Nerve_Tibial	2.98793e-24	6.67324e-20
ENSG00000070018	ENSG00000070018:1	LRP6	0.1843	Brain_Putamen_basal_ganglia	2.98793e-24	6.67324e-20
ENSG00000070018	ENSG00000070018:1	LRP6	0.2765	Testis	2.98793e-24	6.67324e-20
ENSG00000070018	ENSG00000070018:2	LRP6	0.3724	Artery_Tibial	2.98793e-24	6.67324e-20
ENSG00000070018	ENSG00000070018:1	LRP6	0.1945	Esophagus_Mucosa	2.98793e-24	6.67324e-20
ENSG00000070018	ENSG00000070018:2	LRP6	0.4276	Cells_Cultured_fibroblasts	2.98793e-24	6.67324e-20
ENSG00000041988	ENSG00000041988:1	THAP3	0.1051	Small_Intestine_Terminal_Ileum	4.54926e-24	1.01603e-19
ENSG00000213889	ENSG00000213889:1	PPM1N	0.2204	Brain_Cerebellum	8.78096e-24	1.96114e-19
ENSG00000213889	ENSG00000213889:2	PPM1N	0.4712	Cells_Cultured_fibroblasts	8.78096e-24	1.96114e-19
ENSG00000162104	ENSG00000162104:2	ADCY9	0.1439	Thyroid	2.02436e-23	4.5212e-19
ENSG00000162104	ENSG00000162104:1	ADCY9	0.1706	Esophagus_Muscularis	2.02436e-23	4.5212e-19
ENSG00000162104	ENSG00000162104:3	ADCY9	0.3662	Skin_Sun_Exposed	2.02436e-23	4.5212e-19
ENSG00000162104	ENSG00000162104:2	ADCY9	0.378	Pancreas	2.02436e-23	4.5212e-19
ENSG00000162104	ENSG00000162104:1	ADCY9	0.1319	Nerve_Tibial	2.02436e-23	4.5212e-19
ENSG00000179195	ENSG00000179195:1	ZNF664	0.8346	Adipose_Subcutaneous	2.9911e-23	6.68033e-19
ENSG00000179195	ENSG00000179195:1	ZNF664	0.7438	Breast_Mammary_Tissue	2.9911e-23	6.68033e-19
ENSG00000179195	ENSG00000179195:1	ZNF664	0.8626	Adipose_Visceral_Omentum	2.9911e-23	6.68033e-19
ENSG00000004534	ENSG00000004534:3	RBM6	0.159	Esophagus_Muscularis	4.6094e-23	1.02946e-18
ENSG00000100399	ENSG00000100399:1	CHADL	0.3037	Colon_Sigmoid	4.73364e-23	1.05721e-18
ENSG00000100399	ENSG00000100399:2	CHADL	0.158	Adipose_Subcutaneous	4.73364e-23	1.05721e-18
ENSG00000125740	ENSG00000125740:1	FOSB	0.1068	Breast_Mammary_Tissue	1.11449e-22	2.4891e-18
ENSG00000125740	ENSG00000125740:1	FOSB	0.3486	Minor_Salivary_Gland	1.11449e-22	2.4891e-18
ENSG00000125740	ENSG00000125740:1	FOSB	0.1168	Ovary	1.11449e-22	2.4891e-18
ENSG00000115648	ENSG00000115648:1	MLPH	0.1083	Heart_Left_Ventricle	1.70187e-22	3.80096e-18
ENSG00000115648	ENSG00000115648:1	MLPH	0.2245	Esophagus_Mucosa	1.70187e-22	3.80096e-18
ENSG00000115648	ENSG00000115648:1	MLPH	0.1248	Adipose_Visceral_Omentum	1.70187e-22	3.80096e-18
ENSG00000115648	ENSG00000115648:1	MLPH	0.4568	Prostate	1.70187e-22	3.80096e-18
ENSG00000189067	ENSG00000189067:1	LITAF	0.1685	Breast_Mammary_Tissue	3.7448e-22	8.36364e-18
ENSG00000189067	ENSG00000189067:1	LITAF	0.9974	Skin_Sun_Exposed	3.7448e-22	8.36364e-18
ENSG00000189067	ENSG00000189067:2	LITAF	0.8652	Colon_Sigmoid	3.7448e-22	8.36364e-18
ENSG00000189067	ENSG00000189067:1	LITAF	0.1781	Adipose_Subcutaneous	3.7448e-22	8.36364e-18
ENSG00000189067	ENSG00000189067:1	LITAF	0.1181	Esophagus_Mucosa	3.7448e-22	8.36364e-18
ENSG00000189067	ENSG00000189067:1	LITAF	0.1854	Liver	3.7448e-22	8.36364e-18
ENSG00000189067	ENSG00000189067:2	LITAF	0.4423	Colon_Transverse	3.7448e-22	8.36364e-18
ENSG00000189067	ENSG00000189067:1	LITAF	0.1966	Adipose_Visceral_Omentum	3.7448e-22	8.36364e-18
ENSG00000105643	ENSG00000105643:1	ARRDC2	0.1583	Artery_Aorta	7.72707e-22	1.72576e-17
ENSG00000105643	ENSG00000105643:1	ARRDC2	0.4715	Skin_Sun_Exposed	7.72707e-22	1.72576e-17
ENSG00000105643	ENSG00000105643:1	ARRDC2	0.1133	Thyroid	7.72707e-22	1.72576e-17
ENSG00000105643	ENSG00000105643:1	ARRDC2	0.1532	Adipose_Visceral_Omentum	7.72707e-22	1.72576e-17
ENSG00000065243	ENSG00000065243:1	PKN2	0.2446	Cells_Cultured_fibroblasts	7.95806e-22	1.77735e-17
ENSG00000115461	ENSG00000115461:1	IGFBP5	0.2067	Cells_Cultured_fibroblasts	1.08178e-21	2.41605e-17
ENSG00000157227	ENSG00000157227:1	MMP14	0.2918	Brain_Anterior_cingulate_cortex_BA24	1.12189e-21	2.50562e-17
ENSG00000157227	ENSG00000157227:1	MMP14	0.1993	Brain_Putamen_basal_ganglia	1.12189e-21	2.50562e-17
ENSG00000107672	ENSG00000107672:2	NSMCE4A	0.6107	Cells_Cultured_fibroblasts	1.22401e-21	2.7337e-17
ENSG00000107672	ENSG00000107672:1	NSMCE4A	0.1654	Cells_EBV-transformed_lymphocytes	1.22401e-21	2.7337e-17
ENSG00000078699	ENSG00000078699:1	CBFA2T2	0.2837	Lung	1.48519e-21	3.31703e-17
ENSG00000078699	ENSG00000078699:1	CBFA2T2	0.2227	Colon_Transverse	1.48519e-21	3.31703e-17
ENSG00000078699	ENSG00000078699:1	CBFA2T2	0.195	Artery_Tibial	1.48519e-21	3.31703e-17
ENSG00000078699	ENSG00000078699:1	CBFA2T2	0.1791	Brain_Cerebellar_Hemisphere	1.48519e-21	3.31703e-17
ENSG00000078699	ENSG00000078699:1	CBFA2T2	0.2136	Liver	1.48519e-21	3.31703e-17
ENSG00000078699	ENSG00000078699:1	CBFA2T2	0.3537	Skin_Sun_Exposed	1.48519e-21	3.31703e-17
ENSG00000188897	ENSG00000188897:1	CTD-3088G3.8	0.8612	Adipose_Subcutaneous	2.44374e-21	5.45784e-17
ENSG00000188897	ENSG00000188897:3	CTD-3088G3.8	0.6594	Nerve_Tibial	2.44374e-21	5.45784e-17
ENSG00000188897	ENSG00000188897:4	CTD-3088G3.8	0.1047	Thyroid	2.44374e-21	5.45784e-17
ENSG00000188897	ENSG00000188897:1	CTD-3088G3.8	0.4164	Esophagus_Mucosa	2.44374e-21	5.45784e-17
ENSG00000188897	ENSG00000188897:2	CTD-3088G3.8	0.1644	Adipose_Visceral_Omentum	2.44374e-21	5.45784e-17
ENSG00000188897	ENSG00000188897:2	CTD-3088G3.8	0.7537	Whole_Blood	2.44374e-21	5.45784e-17
ENSG00000037965	ENSG00000037965:2	HOXC8	0.1397	Esophagus_Muscularis	2.56759e-21	5.73445e-17
ENSG00000037965	ENSG00000037965:2	HOXC8	0.5283	Lung	2.56759e-21	5.73445e-17
ENSG00000118420	ENSG00000118420:1	UBE3D	0.3848	Cells_Cultured_fibroblasts	2.69022e-21	6.00834e-17
ENSG00000118420	ENSG00000118420:1	UBE3D	0.4926	Lung	2.69022e-21	6.00834e-17
ENSG00000118420	ENSG00000118420:1	UBE3D	0.1208	Esophagus_Muscularis	2.69022e-21	6.00834e-17
ENSG00000183520	ENSG00000183520:1	UTP11	0.67	Adipose_Visceral_Omentum	4.13018e-21	9.22434e-17
ENSG00000183520	ENSG00000183520:1	UTP11	0.8579	Artery_Coronary	4.13018e-21	9.22434e-17
ENSG00000183520	ENSG00000183520:1	UTP11	0.1722	Nerve_Tibial	4.13018e-21	9.22434e-17
ENSG00000183520	ENSG00000183520:1	UTP11	0.9457	Pancreas	4.13018e-21	9.22434e-17
ENSG00000183520	ENSG00000183520:1	UTP11	0.7702	Uterus	4.13018e-21	9.22434e-17
ENSG00000183520	ENSG00000183520:1	UTP11	0.2815	Skin_Sun_Exposed	4.13018e-21	9.22434e-17
ENSG00000183520	ENSG00000183520:1	UTP11	0.9524	Adrenal_Gland	4.13018e-21	9.22434e-17
ENSG00000183520	ENSG00000183520:1	UTP11	0.9883	Artery_Tibial	4.13018e-21	9.22434e-17
ENSG00000183520	ENSG00000183520:1	UTP11	0.8583	Adipose_Subcutaneous	4.13018e-21	9.22434e-17
ENSG00000183520	ENSG00000183520:1	UTP11	0.3668	Cells_Cultured_fibroblasts	4.13018e-21	9.22434e-17
ENSG00000183520	ENSG00000183520:1	UTP11	0.1026	Skin_Not_Sun_Exposed	4.13018e-21	9.22434e-17
ENSG00000183520	ENSG00000183520:1	UTP11	0.951	Artery_Aorta	4.13018e-21	9.22434e-17
ENSG00000183520	ENSG00000183520:1	UTP11	0.7359	Thyroid	4.13018e-21	9.22434e-17
ENSG00000183520	ENSG00000183520:1	UTP11	0.1056	Small_Intestine_Terminal_Ileum	4.13018e-21	9.22434e-17
ENSG00000183520	ENSG00000183520:1	UTP11	0.7353	Heart_Atrial_Appendage	4.13018e-21	9.22434e-17
ENSG00000183520	ENSG00000183520:1	UTP11	0.8081	Breast_Mammary_Tissue	4.13018e-21	9.22434e-17
ENSG00000183520	ENSG00000183520:1	UTP11	0.6347	Lung	4.13018e-21	9.22434e-17
ENSG00000183520	ENSG00000183520:1	UTP11	0.5529	Whole_Blood	4.13018e-21	9.22434e-17
ENSG00000074603	ENSG00000074603:1	DPP8	0.1181	Muscle_Skeletal	5.40931e-21	1.20812e-16
ENSG00000074603	ENSG00000074603:1	DPP8	0.1799	Adrenal_Gland	5.40931e-21	1.20812e-16
ENSG00000074603	ENSG00000074603:2	DPP8	0.196	Whole_Blood	5.40931e-21	1.20812e-16
ENSG00000171813	ENSG00000171813:4	PWWP2B	0.1447	Esophagus_Mucosa	7.38585e-21	1.64956e-16
ENSG00000171813	ENSG00000171813:2	PWWP2B	0.1882	Adipose_Visceral_Omentum	7.38585e-21	1.64956e-16
ENSG00000171813	ENSG00000171813:2	PWWP2B	0.566	Adipose_Subcutaneous	7.38585e-21	1.64956e-16
ENSG00000171813	ENSG00000171813:2	PWWP2B	0.318	Pancreas	7.38585e-21	1.64956e-16
ENSG00000171813	ENSG00000171813:3	PWWP2B	0.177	Pancreas	7.38585e-21	1.64956e-16
ENSG00000171813	ENSG00000171813:2	PWWP2B	0.6229	Skin_Not_Sun_Exposed	7.38585e-21	1.64956e-16
ENSG00000171813	ENSG00000171813:1	PWWP2B	0.2332	Whole_Blood	7.38585e-21	1.64956e-16
ENSG00000100395	ENSG00000100395:1	L3MBTL2	0.1376	Brain_Nucleus_accumbens_basal_ganglia	1.55864e-20	3.48108e-16
ENSG00000100395	ENSG00000100395:1	L3MBTL2	0.1235	Small_Intestine_Terminal_Ileum	1.55864e-20	3.48108e-16
ENSG00000100395	ENSG00000100395:1	L3MBTL2	0.1069	Artery_Coronary	1.55864e-20	3.48108e-16
ENSG00000100395	ENSG00000100395:1	L3MBTL2	0.6062	Cells_EBV-transformed_lymphocytes	1.55864e-20	3.48108e-16
ENSG00000100395	ENSG00000100395:1	L3MBTL2	0.198	Artery_Tibial	1.55864e-20	3.48108e-16
ENSG00000100395	ENSG00000100395:1	L3MBTL2	0.206	Artery_Aorta	1.55864e-20	3.48108e-16
ENSG00000100395	ENSG00000100395:1	L3MBTL2	0.1282	Kidney_Cortex	1.55864e-20	3.48108e-16
ENSG00000124508	ENSG00000124508:1	BTN2A2	0.4535	Whole_Blood	1.84051e-20	4.11059e-16
ENSG00000124508	ENSG00000124508:1	BTN2A2	0.1416	Kidney_Cortex	1.84051e-20	4.11059e-16
ENSG00000156113	ENSG00000156113:3	KCNMA1	0.115	Lung	1.87599e-20	4.18983e-16
ENSG00000156113	ENSG00000156113:1	KCNMA1	0.5297	Brain_Cortex	1.87599e-20	4.18983e-16
ENSG00000204655	ENSG00000204655:1	MOG	0.1877	Artery_Coronary	3.03883e-20	6.78692e-16
ENSG00000204655	ENSG00000204655:1	MOG	0.1081	Lung	3.03883e-20	6.78692e-16
ENSG00000159713	ENSG00000159713:2	TPPP3	0.1829	Thyroid	3.25721e-20	7.27464e-16
ENSG00000120708	ENSG00000120708:2	TGFBI	0.6579	Nerve_Tibial	3.28444e-20	7.33547e-16
ENSG00000120708	ENSG00000120708:1	TGFBI	0.6898	Esophagus_Muscularis	3.28444e-20	7.33547e-16
ENSG00000170606	ENSG00000170606:2	HSPA4	0.5345	Esophagus_Muscularis	5.53601e-20	1.23641e-15
ENSG00000170606	ENSG00000170606:2	HSPA4	0.2589	Skin_Not_Sun_Exposed	5.53601e-20	1.23641e-15
ENSG00000170606	ENSG00000170606:1	HSPA4	0.357	Heart_Left_Ventricle	5.53601e-20	1.23641e-15
ENSG00000170606	ENSG00000170606:2	HSPA4	0.4984	Cells_Cultured_fibroblasts	5.53601e-20	1.23641e-15
ENSG00000170606	ENSG00000170606:1	HSPA4	0.4641	Brain_Cortex	5.53601e-20	1.23641e-15
ENSG00000170606	ENSG00000170606:2	HSPA4	0.4787	Esophagus_Mucosa	5.53601e-20	1.23641e-15
ENSG00000170606	ENSG00000170606:1	HSPA4	0.4005	Brain_Hypothalamus	5.53601e-20	1.23641e-15
ENSG00000170606	ENSG00000170606:1	HSPA4	0.2275	Brain_Cerebellum	5.53601e-20	1.23641e-15
ENSG00000170606	ENSG00000170606:2	HSPA4	0.3979	Minor_Salivary_Gland	5.53601e-20	1.23641e-15
ENSG00000170606	ENSG00000170606:1	HSPA4	0.3959	Brain_Anterior_cingulate_cortex_BA24	5.53601e-20	1.23641e-15
ENSG00000170606	ENSG00000170606:1	HSPA4	0.4019	Brain_Nucleus_accumbens_basal_ganglia	5.53601e-20	1.23641e-15
ENSG00000170606	ENSG00000170606:1	HSPA4	0.3345	Brain_Cerebellar_Hemisphere	5.53601e-20	1.23641e-15
ENSG00000170606	ENSG00000170606:1	HSPA4	0.2846	Brain_Spinal_cord_cervical_c-1	5.53601e-20	1.23641e-15
ENSG00000170606	ENSG00000170606:1	HSPA4	0.1732	Uterus	5.53601e-20	1.23641e-15
ENSG00000170606	ENSG00000170606:1	HSPA4	0.5253	Nerve_Tibial	5.53601e-20	1.23641e-15
ENSG00000170606	ENSG00000170606:1	HSPA4	0.238	Muscle_Skeletal	5.53601e-20	1.23641e-15
ENSG00000170606	ENSG00000170606:1	HSPA4	0.4514	Brain_Amygdala	5.53601e-20	1.23641e-15
ENSG00000170606	ENSG00000170606:2	HSPA4	0.2038	Heart_Atrial_Appendage	5.53601e-20	1.23641e-15
ENSG00000170606	ENSG00000170606:1	HSPA4	0.3794	Testis	5.53601e-20	1.23641e-15
ENSG00000170606	ENSG00000170606:1	HSPA4	0.3556	Colon_Transverse	5.53601e-20	1.23641e-15
ENSG00000170606	ENSG00000170606:2	HSPA4	0.509	Breast_Mammary_Tissue	5.53601e-20	1.23641e-15
ENSG00000170606	ENSG00000170606:1	HSPA4	0.4097	Pituitary	5.53601e-20	1.23641e-15
ENSG00000170606	ENSG00000170606:2	HSPA4	0.4954	Skin_Sun_Exposed	5.53601e-20	1.23641e-15
ENSG00000170606	ENSG00000170606:1	HSPA4	0.3426	Kidney_Cortex	5.53601e-20	1.23641e-15
ENSG00000170606	ENSG00000170606:2	HSPA4	0.5244	Adipose_Subcutaneous	5.53601e-20	1.23641e-15
ENSG00000170606	ENSG00000170606:1	HSPA4	0.2513	Artery_Aorta	5.53601e-20	1.23641e-15
ENSG00000170606	ENSG00000170606:1	HSPA4	0.1019	Esophagus_Gastroesophageal_Junction	5.53601e-20	1.23641e-15
ENSG00000170606	ENSG00000170606:1	HSPA4	0.3737	Brain_Putamen_basal_ganglia	5.53601e-20	1.23641e-15
ENSG00000170606	ENSG00000170606:1	HSPA4	0.2399	Adipose_Visceral_Omentum	5.53601e-20	1.23641e-15
ENSG00000170606	ENSG00000170606:1	HSPA4	0.3605	Brain_Caudate_basal_ganglia	5.53601e-20	1.23641e-15
ENSG00000170606	ENSG00000170606:2	HSPA4	0.5391	Artery_Tibial	5.53601e-20	1.23641e-15
ENSG00000170606	ENSG00000170606:1	HSPA4	0.1751	Colon_Sigmoid	5.53601e-20	1.23641e-15
ENSG00000170606	ENSG00000170606:1	HSPA4	0.1958	Brain_Hippocampus	5.53601e-20	1.23641e-15
ENSG00000170606	ENSG00000170606:1	HSPA4	0.1785	Thyroid	5.53601e-20	1.23641e-15
ENSG00000170606	ENSG00000170606:1	HSPA4	0.3949	Brain_Frontal_Cortex_BA9	5.53601e-20	1.23641e-15
ENSG00000182584	ENSG00000182584:1	ACTL10	0.3871	Lung	6.08488e-20	1.359e-15
ENSG00000118200	ENSG00000118200:2	CAMSAP2	0.2021	Testis	1.02276e-19	2.28423e-15
ENSG00000118200	ENSG00000118200:2	CAMSAP2	0.2498	Skin_Sun_Exposed	1.02276e-19	2.28423e-15
ENSG00000118200	ENSG00000118200:1	CAMSAP2	0.4891	Muscle_Skeletal	1.02276e-19	2.28423e-15
ENSG00000118200	ENSG00000118200:3	CAMSAP2	0.3871	Adipose_Subcutaneous	1.02276e-19	2.28423e-15
ENSG00000084093	ENSG00000084093:1	REST	0.1965	Spleen	1.92255e-19	4.29381e-15
ENSG00000084093	ENSG00000084093:1	REST	0.1438	Pituitary	1.92255e-19	4.29381e-15
ENSG00000084093	ENSG00000084093:2	REST	0.1425	Testis	1.92255e-19	4.29381e-15
ENSG00000084093	ENSG00000084093:1	REST	0.2421	Prostate	1.92255e-19	4.29381e-15
ENSG00000084093	ENSG00000084093:1	REST	0.1565	Adipose_Subcutaneous	1.92255e-19	4.29381e-15
ENSG00000084093	ENSG00000084093:1	REST	0.3487	Artery_Tibial	1.92255e-19	4.29381e-15
ENSG00000084093	ENSG00000084093:1	REST	0.3347	Adipose_Visceral_Omentum	1.92255e-19	4.29381e-15
ENSG00000084093	ENSG00000084093:1	REST	0.1762	Muscle_Skeletal	1.92255e-19	4.29381e-15
ENSG00000084093	ENSG00000084093:1	REST	0.3602	Cells_Cultured_fibroblasts	1.92255e-19	4.29381e-15
ENSG00000084093	ENSG00000084093:1	REST	0.2061	Thyroid	1.92255e-19	4.29381e-15
ENSG00000084093	ENSG00000084093:1	REST	0.3071	Artery_Aorta	1.92255e-19	4.29381e-15
ENSG00000084093	ENSG00000084093:1	REST	0.2917	Artery_Coronary	1.92255e-19	4.29381e-15
ENSG00000101417	ENSG00000101417:1	PXMP4	0.1182	Brain_Cerebellar_Hemisphere	2.50538e-19	5.59552e-15
ENSG00000101417	ENSG00000101417:1	PXMP4	0.2105	Brain_Cerebellum	2.50538e-19	5.59552e-15
ENSG00000101417	ENSG00000101417:1	PXMP4	0.2586	Brain_Frontal_Cortex_BA9	2.50538e-19	5.59552e-15
ENSG00000204644	ENSG00000204644:1	ZFP57	0.9551	Cells_EBV-transformed_lymphocytes	2.75587e-19	6.15495e-15
ENSG00000204644	ENSG00000204644:1	ZFP57	0.9595	Whole_Blood	2.75587e-19	6.15495e-15
ENSG00000204644	ENSG00000204644:2	ZFP57	0.927	Colon_Transverse	2.75587e-19	6.15495e-15
ENSG00000204644	ENSG00000204644:2	ZFP57	0.9623	Skin_Not_Sun_Exposed	2.75587e-19	6.15495e-15
ENSG00000204644	ENSG00000204644:1	ZFP57	0.1565	Ovary	2.75587e-19	6.15495e-15
ENSG00000204644	ENSG00000204644:2	ZFP57	0.9645	Adrenal_Gland	2.75587e-19	6.15495e-15
ENSG00000204644	ENSG00000204644:2	ZFP57	0.9678	Adipose_Visceral_Omentum	2.75587e-19	6.15495e-15
ENSG00000204644	ENSG00000204644:2	ZFP57	0.9649	Adipose_Subcutaneous	2.75587e-19	6.15495e-15
ENSG00000204644	ENSG00000204644:1	ZFP57	0.884	Vagina	2.75587e-19	6.15495e-15
ENSG00000204644	ENSG00000204644:2	ZFP57	0.8781	Breast_Mammary_Tissue	2.75587e-19	6.15495e-15
ENSG00000204644	ENSG00000204644:1	ZFP57	0.9607	Small_Intestine_Terminal_Ileum	2.75587e-19	6.15495e-15
ENSG00000204644	ENSG00000204644:1	ZFP57	0.9652	Lung	2.75587e-19	6.15495e-15
ENSG00000204644	ENSG00000204644:2	ZFP57	0.4976	Artery_Aorta	2.75587e-19	6.15495e-15
ENSG00000204644	ENSG00000204644:2	ZFP57	0.2374	Liver	2.75587e-19	6.15495e-15
ENSG00000204644	ENSG00000204644:2	ZFP57	0.9513	Stomach	2.75587e-19	6.15495e-15
ENSG00000204644	ENSG00000204644:2	ZFP57	0.6577	Pituitary	2.75587e-19	6.15495e-15
ENSG00000204644	ENSG00000204644:2	ZFP57	0.2717	Artery_Coronary	2.75587e-19	6.15495e-15
ENSG00000204644	ENSG00000204644:2	ZFP57	0.9375	Nerve_Tibial	2.75587e-19	6.15495e-15
ENSG00000204644	ENSG00000204644:2	ZFP57	0.8109	Skin_Sun_Exposed	2.75587e-19	6.15495e-15
ENSG00000204644	ENSG00000204644:2	ZFP57	0.7811	Thyroid	2.75587e-19	6.15495e-15
ENSG00000204644	ENSG00000204644:2	ZFP57	0.4294	Heart_Left_Ventricle	2.75587e-19	6.15495e-15
ENSG00000204644	ENSG00000204644:2	ZFP57	0.9452	Esophagus_Mucosa	2.75587e-19	6.15495e-15
ENSG00000204644	ENSG00000204644:1	ZFP57	0.9668	Spleen	2.75587e-19	6.15495e-15
ENSG00000204644	ENSG00000204644:2	ZFP57	0.219	Cells_Cultured_fibroblasts	2.75587e-19	6.15495e-15
ENSG00000167600	ENSG00000167600:2	CYP2S1	0.1481	Skin_Not_Sun_Exposed	3.46444e-19	7.73749e-15
ENSG00000116273	ENSG00000116273:1	PHF13	0.2131	Adrenal_Gland	3.75311e-19	8.3822e-15
ENSG00000119718	ENSG00000119718:1	EIF2B2	0.1702	Adrenal_Gland	3.99465e-19	8.92164e-15
ENSG00000119718	ENSG00000119718:1	EIF2B2	0.1691	Brain_Amygdala	3.99465e-19	8.92164e-15
ENSG00000119718	ENSG00000119718:1	EIF2B2	0.1222	Small_Intestine_Terminal_Ileum	3.99465e-19	8.92164e-15
ENSG00000119718	ENSG00000119718:1	EIF2B2	0.2228	Colon_Sigmoid	3.99465e-19	8.92164e-15
ENSG00000119718	ENSG00000119718:1	EIF2B2	0.1258	Brain_Frontal_Cortex_BA9	3.99465e-19	8.92164e-15
ENSG00000119718	ENSG00000119718:1	EIF2B2	0.1883	Skin_Sun_Exposed	3.99465e-19	8.92164e-15
ENSG00000119718	ENSG00000119718:1	EIF2B2	0.1543	Thyroid	3.99465e-19	8.92164e-15
ENSG00000119718	ENSG00000119718:1	EIF2B2	0.1614	Artery_Coronary	3.99465e-19	8.92164e-15
ENSG00000119718	ENSG00000119718:1	EIF2B2	0.1399	Pituitary	3.99465e-19	8.92164e-15
ENSG00000119718	ENSG00000119718:1	EIF2B2	0.1076	Brain_Hippocampus	3.99465e-19	8.92164e-15
ENSG00000119718	ENSG00000119718:1	EIF2B2	0.1613	Muscle_Skeletal	3.99465e-19	8.92164e-15
ENSG00000119718	ENSG00000119718:1	EIF2B2	0.2207	Breast_Mammary_Tissue	3.99465e-19	8.92164e-15
ENSG00000119718	ENSG00000119718:1	EIF2B2	0.155	Spleen	3.99465e-19	8.92164e-15
ENSG00000119718	ENSG00000119718:1	EIF2B2	0.1145	Brain_Caudate_basal_ganglia	3.99465e-19	8.92164e-15
ENSG00000119718	ENSG00000119718:1	EIF2B2	0.2519	Whole_Blood	3.99465e-19	8.92164e-15
ENSG00000119718	ENSG00000119718:1	EIF2B2	0.18	Uterus	3.99465e-19	8.92164e-15
ENSG00000119718	ENSG00000119718:1	EIF2B2	0.1437	Vagina	3.99465e-19	8.92164e-15
ENSG00000119718	ENSG00000119718:1	EIF2B2	0.1159	Brain_Hypothalamus	3.99465e-19	8.92164e-15
ENSG00000119718	ENSG00000119718:1	EIF2B2	0.1076	Cells_Cultured_fibroblasts	3.99465e-19	8.92164e-15
ENSG00000119718	ENSG00000119718:1	EIF2B2	0.1293	Testis	3.99465e-19	8.92164e-15
ENSG00000119718	ENSG00000119718:1	EIF2B2	0.1686	Minor_Salivary_Gland	3.99465e-19	8.92164e-15
ENSG00000119718	ENSG00000119718:1	EIF2B2	0.219	Adipose_Visceral_Omentum	3.99465e-19	8.92164e-15
ENSG00000119718	ENSG00000119718:1	EIF2B2	0.2609	Adipose_Subcutaneous	3.99465e-19	8.92164e-15
ENSG00000119718	ENSG00000119718:1	EIF2B2	0.1697	Artery_Aorta	3.99465e-19	8.92164e-15
ENSG00000119718	ENSG00000119718:1	EIF2B2	0.1538	Brain_Cortex	3.99465e-19	8.92164e-15
ENSG00000119718	ENSG00000119718:1	EIF2B2	0.119	Heart_Atrial_Appendage	3.99465e-19	8.92164e-15
ENSG00000119718	ENSG00000119718:1	EIF2B2	0.24	Lung	3.99465e-19	8.92164e-15
ENSG00000119718	ENSG00000119718:1	EIF2B2	0.1826	Skin_Not_Sun_Exposed	3.99465e-19	8.92164e-15
ENSG00000119718	ENSG00000119718:1	EIF2B2	0.2279	Nerve_Tibial	3.99465e-19	8.92164e-15
ENSG00000119718	ENSG00000119718:1	EIF2B2	0.2363	Stomach	3.99465e-19	8.92164e-15
ENSG00000119718	ENSG00000119718:1	EIF2B2	0.1472	Kidney_Cortex	3.99465e-19	8.92164e-15
ENSG00000119718	ENSG00000119718:1	EIF2B2	0.1475	Brain_Putamen_basal_ganglia	3.99465e-19	8.92164e-15
ENSG00000119718	ENSG00000119718:1	EIF2B2	0.138	Esophagus_Mucosa	3.99465e-19	8.92164e-15
ENSG00000119718	ENSG00000119718:1	EIF2B2	0.1692	Artery_Tibial	3.99465e-19	8.92164e-15
ENSG00000119718	ENSG00000119718:1	EIF2B2	0.1278	Cells_EBV-transformed_lymphocytes	3.99465e-19	8.92164e-15
ENSG00000119718	ENSG00000119718:1	EIF2B2	0.1674	Heart_Left_Ventricle	3.99465e-19	8.92164e-15
ENSG00000119718	ENSG00000119718:1	EIF2B2	0.1516	Esophagus_Gastroesophageal_Junction	3.99465e-19	8.92164e-15
ENSG00000119718	ENSG00000119718:1	EIF2B2	0.1248	Brain_Nucleus_accumbens_basal_ganglia	3.99465e-19	8.92164e-15
ENSG00000119718	ENSG00000119718:1	EIF2B2	0.1868	Brain_Spinal_cord_cervical_c-1	3.99465e-19	8.92164e-15
ENSG00000119718	ENSG00000119718:1	EIF2B2	0.1804	Colon_Transverse	3.99465e-19	8.92164e-15
ENSG00000119718	ENSG00000119718:1	EIF2B2	0.2197	Esophagus_Muscularis	3.99465e-19	8.92164e-15
ENSG00000177311	ENSG00000177311:1	ZBTB38	0.3704	Skin_Not_Sun_Exposed	5.88776e-19	1.31497e-14
ENSG00000177311	ENSG00000177311:1	ZBTB38	0.457	Adipose_Subcutaneous	5.88776e-19	1.31497e-14
ENSG00000177311	ENSG00000177311:2	ZBTB38	0.4133	Artery_Tibial	5.88776e-19	1.31497e-14
ENSG00000177311	ENSG00000177311:1	ZBTB38	0.4021	Esophagus_Mucosa	5.88776e-19	1.31497e-14
ENSG00000177311	ENSG00000177311:1	ZBTB38	0.4875	Esophagus_Gastroesophageal_Junction	5.88776e-19	1.31497e-14
ENSG00000177311	ENSG00000177311:2	ZBTB38	0.2883	Esophagus_Muscularis	5.88776e-19	1.31497e-14
ENSG00000177311	ENSG00000177311:1	ZBTB38	0.3878	Skin_Sun_Exposed	5.88776e-19	1.31497e-14
ENSG00000177311	ENSG00000177311:1	ZBTB38	0.1363	Heart_Atrial_Appendage	5.88776e-19	1.31497e-14
ENSG00000177311	ENSG00000177311:1	ZBTB38	0.4943	Breast_Mammary_Tissue	5.88776e-19	1.31497e-14
ENSG00000177311	ENSG00000177311:1	ZBTB38	0.4576	Whole_Blood	5.88776e-19	1.31497e-14
ENSG00000177311	ENSG00000177311:1	ZBTB38	0.453	Spleen	5.88776e-19	1.31497e-14
ENSG00000177311	ENSG00000177311:1	ZBTB38	0.4007	Thyroid	5.88776e-19	1.31497e-14
ENSG00000198682	ENSG00000198682:1	PAPSS2	0.3582	Breast_Mammary_Tissue	6.2374e-19	1.39306e-14
ENSG00000198682	ENSG00000198682:1	PAPSS2	0.234	Testis	6.2374e-19	1.39306e-14
ENSG00000198682	ENSG00000198682:1	PAPSS2	0.3831	Adipose_Subcutaneous	6.2374e-19	1.39306e-14
ENSG00000198682	ENSG00000198682:1	PAPSS2	0.3658	Muscle_Skeletal	6.2374e-19	1.39306e-14
ENSG00000198682	ENSG00000198682:2	PAPSS2	0.277	Skin_Sun_Exposed	6.2374e-19	1.39306e-14
ENSG00000198682	ENSG00000198682:1	PAPSS2	0.3219	Heart_Left_Ventricle	6.2374e-19	1.39306e-14
ENSG00000198682	ENSG00000198682:1	PAPSS2	0.287	Heart_Atrial_Appendage	6.2374e-19	1.39306e-14
ENSG00000198682	ENSG00000198682:1	PAPSS2	0.3544	Adipose_Visceral_Omentum	6.2374e-19	1.39306e-14
ENSG00000198682	ENSG00000198682:2	PAPSS2	0.3311	Esophagus_Muscularis	6.2374e-19	1.39306e-14
ENSG00000198682	ENSG00000198682:1	PAPSS2	0.52	Pancreas	6.2374e-19	1.39306e-14
ENSG00000168769	ENSG00000168769:1	TET2	0.2196	Esophagus_Gastroesophageal_Junction	6.23792e-19	1.39318e-14
ENSG00000168769	ENSG00000168769:1	TET2	0.1507	Esophagus_Muscularis	6.23792e-19	1.39318e-14
ENSG00000168769	ENSG00000168769:1	TET2	0.5048	Artery_Tibial	6.23792e-19	1.39318e-14
ENSG00000168769	ENSG00000168769:2	TET2	0.1247	Cells_Cultured_fibroblasts	6.23792e-19	1.39318e-14
ENSG00000168769	ENSG00000168769:1	TET2	0.4241	Skin_Not_Sun_Exposed	6.23792e-19	1.39318e-14
ENSG00000168769	ENSG00000168769:1	TET2	0.4249	Adipose_Visceral_Omentum	6.23792e-19	1.39318e-14
ENSG00000168769	ENSG00000168769:1	TET2	0.2865	Adipose_Subcutaneous	6.23792e-19	1.39318e-14
ENSG00000179008	ENSG00000179008:1	C14orf39	0.1896	Minor_Salivary_Gland	6.7099e-19	1.49859e-14
ENSG00000179008	ENSG00000179008:1	C14orf39	0.2246	Cells_Cultured_fibroblasts	6.7099e-19	1.49859e-14
ENSG00000179008	ENSG00000179008:1	C14orf39	0.1886	Pituitary	6.7099e-19	1.49859e-14
ENSG00000179008	ENSG00000179008:1	C14orf39	0.1019	Artery_Tibial	6.7099e-19	1.49859e-14
ENSG00000179008	ENSG00000179008:1	C14orf39	0.1301	Breast_Mammary_Tissue	6.7099e-19	1.49859e-14
ENSG00000179008	ENSG00000179008:2	C14orf39	0.7682	Muscle_Skeletal	6.7099e-19	1.49859e-14
ENSG00000179008	ENSG00000179008:1	C14orf39	0.2028	Esophagus_Muscularis	6.7099e-19	1.49859e-14
ENSG00000179008	ENSG00000179008:1	C14orf39	0.1329	Prostate	6.7099e-19	1.49859e-14
ENSG00000100345	ENSG00000100345:1	MYH9	0.1631	Brain_Hypothalamus	9.39652e-19	2.09862e-14
ENSG00000105656	ENSG00000105656:1	ELL	0.1942	Adipose_Subcutaneous	9.56608e-19	2.13649e-14
ENSG00000105656	ENSG00000105656:1	ELL	0.1394	Esophagus_Gastroesophageal_Junction	9.56608e-19	2.13649e-14
ENSG00000105656	ENSG00000105656:1	ELL	0.1521	Brain_Cerebellum	9.56608e-19	2.13649e-14
ENSG00000105656	ENSG00000105656:2	ELL	0.1056	Cells_EBV-transformed_lymphocytes	9.56608e-19	2.13649e-14
ENSG00000105656	ENSG00000105656:1	ELL	0.1276	Colon_Transverse	9.56608e-19	2.13649e-14
ENSG00000264522	ENSG00000264522:1	OTUD7B	0.152	Cells_Cultured_fibroblasts	1.01679e-18	2.27089e-14
ENSG00000264522	ENSG00000264522:1	OTUD7B	0.1316	Brain_Frontal_Cortex_BA9	1.01679e-18	2.27089e-14
ENSG00000264522	ENSG00000264522:1	OTUD7B	0.5568	Whole_Blood	1.01679e-18	2.27089e-14
ENSG00000264522	ENSG00000264522:1	OTUD7B	0.322	Brain_Nucleus_accumbens_basal_ganglia	1.01679e-18	2.27089e-14
ENSG00000264522	ENSG00000264522:1	OTUD7B	0.1058	Stomach	1.01679e-18	2.27089e-14
ENSG00000264522	ENSG00000264522:1	OTUD7B	0.6464	Skin_Not_Sun_Exposed	1.01679e-18	2.27089e-14
ENSG00000264522	ENSG00000264522:1	OTUD7B	0.5143	Colon_Transverse	1.01679e-18	2.27089e-14
ENSG00000264522	ENSG00000264522:1	OTUD7B	0.6038	Skin_Sun_Exposed	1.01679e-18	2.27089e-14
ENSG00000171824	ENSG00000171824:1	EXOSC10	0.132	Brain_Cerebellum	1.31191e-18	2.93002e-14
ENSG00000171824	ENSG00000171824:1	EXOSC10	0.2334	Esophagus_Muscularis	1.31191e-18	2.93002e-14
ENSG00000171824	ENSG00000171824:2	EXOSC10	0.1182	Adipose_Subcutaneous	1.31191e-18	2.93002e-14
ENSG00000171824	ENSG00000171824:1	EXOSC10	0.2055	Pancreas	1.31191e-18	2.93002e-14
ENSG00000171824	ENSG00000171824:1	EXOSC10	0.1493	Brain_Cerebellar_Hemisphere	1.31191e-18	2.93002e-14
ENSG00000171824	ENSG00000171824:1	EXOSC10	0.2084	Artery_Tibial	1.31191e-18	2.93002e-14
ENSG00000171824	ENSG00000171824:1	EXOSC10	0.2572	Colon_Transverse	1.31191e-18	2.93002e-14
ENSG00000171824	ENSG00000171824:1	EXOSC10	0.2036	Kidney_Cortex	1.31191e-18	2.93002e-14
ENSG00000171824	ENSG00000171824:1	EXOSC10	0.1121	Whole_Blood	1.31191e-18	2.93002e-14
ENSG00000171824	ENSG00000171824:3	EXOSC10	0.1498	Skin_Not_Sun_Exposed	1.31191e-18	2.93002e-14
ENSG00000171824	ENSG00000171824:1	EXOSC10	0.1139	Brain_Cortex	1.31191e-18	2.93002e-14
ENSG00000171824	ENSG00000171824:1	EXOSC10	0.2174	Brain_Nucleus_accumbens_basal_ganglia	1.31191e-18	2.93002e-14
ENSG00000171824	ENSG00000171824:1	EXOSC10	0.2455	Esophagus_Gastroesophageal_Junction	1.31191e-18	2.93002e-14
ENSG00000171824	ENSG00000171824:1	EXOSC10	0.1629	Breast_Mammary_Tissue	1.31191e-18	2.93002e-14
ENSG00000171824	ENSG00000171824:1	EXOSC10	0.252	Stomach	1.31191e-18	2.93002e-14
ENSG00000171824	ENSG00000171824:1	EXOSC10	0.1605	Heart_Left_Ventricle	1.31191e-18	2.93002e-14
ENSG00000171824	ENSG00000171824:1	EXOSC10	0.1692	Thyroid	1.31191e-18	2.93002e-14
ENSG00000171824	ENSG00000171824:1	EXOSC10	0.2483	Colon_Sigmoid	1.31191e-18	2.93002e-14
ENSG00000171824	ENSG00000171824:1	EXOSC10	0.1757	Skin_Sun_Exposed	1.31191e-18	2.93002e-14
ENSG00000171824	ENSG00000171824:1	EXOSC10	0.2893	Lung	1.31191e-18	2.93002e-14
ENSG00000171824	ENSG00000171824:1	EXOSC10	0.2499	Pituitary	1.31191e-18	2.93002e-14
ENSG00000171824	ENSG00000171824:2	EXOSC10	0.1378	Testis	1.31191e-18	2.93002e-14
ENSG00000171824	ENSG00000171824:1	EXOSC10	0.1705	Adrenal_Gland	1.31191e-18	2.93002e-14
ENSG00000092969	ENSG00000092969:1	TGFB2	0.937	Colon_Sigmoid	1.43251e-18	3.19937e-14
ENSG00000103742	ENSG00000103742:1	IGDCC4	0.3575	Pancreas	1.92013e-18	4.28841e-14
ENSG00000103742	ENSG00000103742:1	IGDCC4	0.1813	Esophagus_Muscularis	1.92013e-18	4.28841e-14
ENSG00000103742	ENSG00000103742:1	IGDCC4	0.1016	Colon_Transverse	1.92013e-18	4.28841e-14
ENSG00000103742	ENSG00000103742:2	IGDCC4	0.1392	Adipose_Subcutaneous	1.92013e-18	4.28841e-14
ENSG00000103742	ENSG00000103742:1	IGDCC4	0.6984	Adrenal_Gland	1.92013e-18	4.28841e-14
ENSG00000103742	ENSG00000103742:1	IGDCC4	0.118	Brain_Cerebellar_Hemisphere	1.92013e-18	4.28841e-14
ENSG00000103742	ENSG00000103742:1	IGDCC4	0.269	Brain_Caudate_basal_ganglia	1.92013e-18	4.28841e-14
ENSG00000103742	ENSG00000103742:1	IGDCC4	0.1224	Muscle_Skeletal	1.92013e-18	4.28841e-14
ENSG00000103742	ENSG00000103742:1	IGDCC4	0.4305	Brain_Putamen_basal_ganglia	1.92013e-18	4.28841e-14
ENSG00000171819	ENSG00000171819:1	ANGPTL7	0.1403	Adrenal_Gland	2.41406e-18	5.39156e-14
ENSG00000171819	ENSG00000171819:2	ANGPTL7	0.1941	Nerve_Tibial	2.41406e-18	5.39156e-14
ENSG00000171819	ENSG00000171819:1	ANGPTL7	0.3039	Pituitary	2.41406e-18	5.39156e-14
ENSG00000171819	ENSG00000171819:1	ANGPTL7	0.1387	Nerve_Tibial	2.41406e-18	5.39156e-14
ENSG00000119242	ENSG00000119242:2	CCDC92	0.7723	Adipose_Visceral_Omentum	2.68949e-18	6.0067e-14
ENSG00000119242	ENSG00000119242:2	CCDC92	0.8461	Breast_Mammary_Tissue	2.68949e-18	6.0067e-14
ENSG00000184302	ENSG00000184302:1	SIX6	0.2201	Muscle_Skeletal	3.76967e-18	8.41919e-14
ENSG00000184302	ENSG00000184302:2	SIX6	0.7147	Muscle_Skeletal	3.76967e-18	8.41919e-14
ENSG00000180376	ENSG00000180376:1	CCDC66	0.1898	Brain_Hypothalamus	4.42889e-18	9.89149e-14
ENSG00000180376	ENSG00000180376:1	CCDC66	0.5412	Uterus	4.42889e-18	9.89149e-14
ENSG00000180376	ENSG00000180376:2	CCDC66	0.709	Whole_Blood	4.42889e-18	9.89149e-14
ENSG00000180376	ENSG00000180376:2	CCDC66	0.6702	Minor_Salivary_Gland	4.42889e-18	9.89149e-14
ENSG00000180376	ENSG00000180376:2	CCDC66	0.1081	Adrenal_Gland	4.42889e-18	9.89149e-14
ENSG00000180376	ENSG00000180376:1	CCDC66	0.5371	Brain_Amygdala	4.42889e-18	9.89149e-14
ENSG00000180376	ENSG00000180376:3	CCDC66	0.4998	Spleen	4.42889e-18	9.89149e-14
ENSG00000180376	ENSG00000180376:1	CCDC66	0.5028	Brain_Spinal_cord_cervical_c-1	4.42889e-18	9.89149e-14
ENSG00000180376	ENSG00000180376:1	CCDC66	0.1359	Brain_Anterior_cingulate_cortex_BA24	4.42889e-18	9.89149e-14
ENSG00000180376	ENSG00000180376:2	CCDC66	0.5962	Brain_Cerebellum	4.42889e-18	9.89149e-14
ENSG00000180376	ENSG00000180376:1	CCDC66	0.6029	Brain_Frontal_Cortex_BA9	4.42889e-18	9.89149e-14
ENSG00000180376	ENSG00000180376:4	CCDC66	0.3839	Muscle_Skeletal	4.42889e-18	9.89149e-14
ENSG00000180376	ENSG00000180376:1	CCDC66	0.4978	Brain_Substantia_nigra	4.42889e-18	9.89149e-14
ENSG00000180376	ENSG00000180376:1	CCDC66	0.6229	Brain_Nucleus_accumbens_basal_ganglia	4.42889e-18	9.89149e-14
ENSG00000180376	ENSG00000180376:1	CCDC66	0.6911	Pituitary	4.42889e-18	9.89149e-14
ENSG00000180376	ENSG00000180376:2	CCDC66	0.1205	Brain_Cortex	4.42889e-18	9.89149e-14
ENSG00000113658	ENSG00000113658:2	SMAD5	0.2795	Cells_Cultured_fibroblasts	4.67628e-18	1.0444e-13
ENSG00000113658	ENSG00000113658:2	SMAD5	0.1134	Prostate	4.67628e-18	1.0444e-13
ENSG00000113658	ENSG00000113658:1	SMAD5	0.2118	Heart_Atrial_Appendage	4.67628e-18	1.0444e-13
ENSG00000113658	ENSG00000113658:1	SMAD5	0.8747	Esophagus_Muscularis	4.67628e-18	1.0444e-13
ENSG00000113658	ENSG00000113658:1	SMAD5	0.8336	Artery_Tibial	4.67628e-18	1.0444e-13
ENSG00000008441	ENSG00000008441:1	NFIX	0.2017	Heart_Atrial_Appendage	5.23673e-18	1.16957e-13
ENSG00000008441	ENSG00000008441:1	NFIX	0.2032	Whole_Blood	5.23673e-18	1.16957e-13
ENSG00000198793	ENSG00000198793:1	MTOR	0.144	Adipose_Subcutaneous	6.03592e-18	1.34806e-13
ENSG00000198793	ENSG00000198793:1	MTOR	0.1091	Brain_Putamen_basal_ganglia	6.03592e-18	1.34806e-13
ENSG00000198793	ENSG00000198793:1	MTOR	0.1497	Brain_Caudate_basal_ganglia	6.03592e-18	1.34806e-13
ENSG00000213949	ENSG00000213949:1	ITGA1	0.4424	Prostate	7.0521e-18	1.57501e-13
ENSG00000213949	ENSG00000213949:1	ITGA1	0.9957	Esophagus_Muscularis	7.0521e-18	1.57501e-13
ENSG00000213949	ENSG00000213949:1	ITGA1	0.8637	Nerve_Tibial	7.0521e-18	1.57501e-13
ENSG00000213949	ENSG00000213949:1	ITGA1	0.9843	Spleen	7.0521e-18	1.57501e-13
ENSG00000213949	ENSG00000213949:1	ITGA1	0.9976	Colon_Transverse	7.0521e-18	1.57501e-13
ENSG00000213949	ENSG00000213949:2	ITGA1	0.1434	Thyroid	7.0521e-18	1.57501e-13
ENSG00000213949	ENSG00000213949:2	ITGA1	0.3875	Pancreas	7.0521e-18	1.57501e-13
ENSG00000213949	ENSG00000213949:1	ITGA1	0.5723	Stomach	7.0521e-18	1.57501e-13
ENSG00000213949	ENSG00000213949:1	ITGA1	0.998	Esophagus_Gastroesophageal_Junction	7.0521e-18	1.57501e-13
ENSG00000213949	ENSG00000213949:2	ITGA1	0.2808	Skin_Not_Sun_Exposed	7.0521e-18	1.57501e-13
ENSG00000125967	ENSG00000125967:1	NECAB3	0.1038	Lung	9.47888e-18	2.11701e-13
ENSG00000125967	ENSG00000125967:1	NECAB3	0.7045	Nerve_Tibial	9.47888e-18	2.11701e-13
ENSG00000125967	ENSG00000125967:1	NECAB3	0.7521	Artery_Aorta	9.47888e-18	2.11701e-13
ENSG00000125967	ENSG00000125967:1	NECAB3	0.6127	Artery_Tibial	9.47888e-18	2.11701e-13
ENSG00000125967	ENSG00000125967:1	NECAB3	0.3386	Brain_Putamen_basal_ganglia	9.47888e-18	2.11701e-13
ENSG00000125967	ENSG00000125967:1	NECAB3	0.842	Esophagus_Mucosa	9.47888e-18	2.11701e-13
ENSG00000125967	ENSG00000125967:1	NECAB3	0.7128	Artery_Coronary	9.47888e-18	2.11701e-13
ENSG00000125967	ENSG00000125967:1	NECAB3	0.1131	Skin_Sun_Exposed	9.47888e-18	2.11701e-13
ENSG00000125967	ENSG00000125967:1	NECAB3	0.1294	Liver	9.47888e-18	2.11701e-13
ENSG00000125967	ENSG00000125967:1	NECAB3	0.6209	Brain_Nucleus_accumbens_basal_ganglia	9.47888e-18	2.11701e-13
ENSG00000125967	ENSG00000125967:1	NECAB3	0.4898	Pituitary	9.47888e-18	2.11701e-13
ENSG00000125967	ENSG00000125967:1	NECAB3	0.7055	Cells_Cultured_fibroblasts	9.47888e-18	2.11701e-13
ENSG00000125967	ENSG00000125967:2	NECAB3	0.1447	Adrenal_Gland	9.47888e-18	2.11701e-13
ENSG00000118473	ENSG00000118473:1	SGIP1	0.2829	Cells_Cultured_fibroblasts	1.24143e-17	2.7726e-13
ENSG00000162998	ENSG00000162998:2	FRZB	0.1016	Esophagus_Mucosa	1.24162e-17	2.77303e-13
ENSG00000162998	ENSG00000162998:2	FRZB	0.1065	Brain_Frontal_Cortex_BA9	1.24162e-17	2.77303e-13
ENSG00000162998	ENSG00000162998:1	FRZB	0.1292	Small_Intestine_Terminal_Ileum	1.24162e-17	2.77303e-13
ENSG00000162998	ENSG00000162998:2	FRZB	0.2433	Vagina	1.24162e-17	2.77303e-13
ENSG00000162998	ENSG00000162998:1	FRZB	0.5279	Breast_Mammary_Tissue	1.24162e-17	2.77303e-13
ENSG00000162998	ENSG00000162998:1	FRZB	0.5444	Nerve_Tibial	1.24162e-17	2.77303e-13
ENSG00000147437	ENSG00000147437:1	GNRH1	0.8771	Whole_Blood	1.29103e-17	2.88338e-13
ENSG00000147437	ENSG00000147437:1	GNRH1	0.1062	Skin_Sun_Exposed	1.29103e-17	2.88338e-13
ENSG00000116649	ENSG00000116649:1	SRM	0.1835	Esophagus_Mucosa	2.77791e-17	6.20419e-13
ENSG00000116649	ENSG00000116649:1	SRM	0.2005	Skin_Not_Sun_Exposed	2.77791e-17	6.20419e-13
ENSG00000116649	ENSG00000116649:1	SRM	0.11	Brain_Frontal_Cortex_BA9	2.77791e-17	6.20419e-13
ENSG00000138152	ENSG00000138152:1	BTBD16	0.1401	Uterus	3.30418e-17	7.37956e-13
ENSG00000138152	ENSG00000138152:1	BTBD16	0.175	Stomach	3.30418e-17	7.37956e-13
ENSG00000138152	ENSG00000138152:1	BTBD16	0.4716	Brain_Caudate_basal_ganglia	3.30418e-17	7.37956e-13
ENSG00000138152	ENSG00000138152:1	BTBD16	0.286	Small_Intestine_Terminal_Ileum	3.30418e-17	7.37956e-13
ENSG00000138152	ENSG00000138152:1	BTBD16	0.4585	Kidney_Cortex	3.30418e-17	7.37956e-13
ENSG00000138152	ENSG00000138152:1	BTBD16	0.2641	Adipose_Subcutaneous	3.30418e-17	7.37956e-13
ENSG00000138152	ENSG00000138152:1	BTBD16	0.1724	Heart_Atrial_Appendage	3.30418e-17	7.37956e-13
ENSG00000138152	ENSG00000138152:1	BTBD16	0.2849	Vagina	3.30418e-17	7.37956e-13
ENSG00000138152	ENSG00000138152:1	BTBD16	0.1601	Minor_Salivary_Gland	3.30418e-17	7.37956e-13
ENSG00000138152	ENSG00000138152:1	BTBD16	0.2701	Breast_Mammary_Tissue	3.30418e-17	7.37956e-13
ENSG00000138152	ENSG00000138152:1	BTBD16	0.213	Brain_Amygdala	3.30418e-17	7.37956e-13
ENSG00000138152	ENSG00000138152:1	BTBD16	0.2583	Adrenal_Gland	3.30418e-17	7.37956e-13
ENSG00000138152	ENSG00000138152:4	BTBD16	0.1088	Thyroid	3.30418e-17	7.37956e-13
ENSG00000138152	ENSG00000138152:1	BTBD16	0.1536	Brain_Hypothalamus	3.30418e-17	7.37956e-13
ENSG00000138152	ENSG00000138152:1	BTBD16	0.3025	Brain_Nucleus_accumbens_basal_ganglia	3.30418e-17	7.37956e-13
ENSG00000005243	ENSG00000005243:1	COPZ2	0.3951	Testis	4.42009e-17	9.87182e-13
ENSG00000005243	ENSG00000005243:1	COPZ2	0.2815	Pituitary	4.42009e-17	9.87182e-13
ENSG00000004139	ENSG00000004139:1	SARM1	0.2749	Skin_Not_Sun_Exposed	4.69813e-17	1.04928e-12
ENSG00000004139	ENSG00000004139:2	SARM1	0.3367	Prostate	4.69813e-17	1.04928e-12
ENSG00000004139	ENSG00000004139:1	SARM1	0.2351	Skin_Sun_Exposed	4.69813e-17	1.04928e-12
ENSG00000004139	ENSG00000004139:1	SARM1	0.367	Artery_Aorta	4.69813e-17	1.04928e-12
ENSG00000004139	ENSG00000004139:1	SARM1	0.3968	Cells_Cultured_fibroblasts	4.69813e-17	1.04928e-12
ENSG00000004139	ENSG00000004139:1	SARM1	0.4742	Adipose_Subcutaneous	4.69813e-17	1.04928e-12
ENSG00000004139	ENSG00000004139:1	SARM1	0.3135	Thyroid	4.69813e-17	1.04928e-12
ENSG00000004139	ENSG00000004139:1	SARM1	0.2777	Spleen	4.69813e-17	1.04928e-12
ENSG00000004139	ENSG00000004139:1	SARM1	0.1205	Adipose_Visceral_Omentum	4.69813e-17	1.04928e-12
ENSG00000004139	ENSG00000004139:1	SARM1	0.3815	Breast_Mammary_Tissue	4.69813e-17	1.04928e-12
ENSG00000004139	ENSG00000004139:1	SARM1	0.3886	Whole_Blood	4.69813e-17	1.04928e-12
ENSG00000004139	ENSG00000004139:1	SARM1	0.1024	Esophagus_Mucosa	4.69813e-17	1.04928e-12
ENSG00000101412	ENSG00000101412:1	E2F1	0.3421	Brain_Nucleus_accumbens_basal_ganglia	7.9728e-17	1.78064e-12
ENSG00000101412	ENSG00000101412:1	E2F1	0.4269	Brain_Substantia_nigra	7.9728e-17	1.78064e-12
ENSG00000101412	ENSG00000101412:1	E2F1	0.1308	Adipose_Subcutaneous	7.9728e-17	1.78064e-12
ENSG00000101412	ENSG00000101412:1	E2F1	0.2497	Brain_Amygdala	7.9728e-17	1.78064e-12
ENSG00000101412	ENSG00000101412:1	E2F1	0.2284	Brain_Hippocampus	7.9728e-17	1.78064e-12
ENSG00000101412	ENSG00000101412:1	E2F1	0.3589	Brain_Cortex	7.9728e-17	1.78064e-12
ENSG00000101412	ENSG00000101412:1	E2F1	0.1489	Brain_Frontal_Cortex_BA9	7.9728e-17	1.78064e-12
ENSG00000101412	ENSG00000101412:1	E2F1	0.1763	Testis	7.9728e-17	1.78064e-12
ENSG00000101412	ENSG00000101412:1	E2F1	0.2575	Brain_Spinal_cord_cervical_c-1	7.9728e-17	1.78064e-12
ENSG00000108654	ENSG00000108654:1	DDX5	0.8614	Brain_Cerebellar_Hemisphere	9.93249e-17	2.21832e-12
ENSG00000108654	ENSG00000108654:1	DDX5	0.9601	Esophagus_Gastroesophageal_Junction	9.93249e-17	2.21832e-12
ENSG00000108654	ENSG00000108654:1	DDX5	0.4331	Brain_Cerebellum	9.93249e-17	2.21832e-12
ENSG00000108654	ENSG00000108654:1	DDX5	0.989	Adipose_Subcutaneous	9.93249e-17	2.21832e-12
ENSG00000108654	ENSG00000108654:1	DDX5	0.2735	Artery_Coronary	9.93249e-17	2.21832e-12
ENSG00000108654	ENSG00000108654:1	DDX5	0.3959	Colon_Sigmoid	9.93249e-17	2.21832e-12
ENSG00000108654	ENSG00000108654:1	DDX5	0.9731	Colon_Transverse	9.93249e-17	2.21832e-12
ENSG00000108654	ENSG00000108654:1	DDX5	0.968	Esophagus_Mucosa	9.93249e-17	2.21832e-12
ENSG00000108654	ENSG00000108654:1	DDX5	0.9777	Spleen	9.93249e-17	2.21832e-12
ENSG00000108654	ENSG00000108654:1	DDX5	0.9321	Brain_Frontal_Cortex_BA9	9.93249e-17	2.21832e-12
ENSG00000108654	ENSG00000108654:1	DDX5	0.975	Skin_Sun_Exposed	9.93249e-17	2.21832e-12
ENSG00000108654	ENSG00000108654:1	DDX5	0.9157	Brain_Putamen_basal_ganglia	9.93249e-17	2.21832e-12
ENSG00000108654	ENSG00000108654:1	DDX5	0.967	Heart_Left_Ventricle	9.93249e-17	2.21832e-12
ENSG00000108654	ENSG00000108654:1	DDX5	0.9704	Brain_Hippocampus	9.93249e-17	2.21832e-12
ENSG00000108654	ENSG00000108654:1	DDX5	0.4785	Brain_Caudate_basal_ganglia	9.93249e-17	2.21832e-12
ENSG00000108654	ENSG00000108654:1	DDX5	0.8852	Stomach	9.93249e-17	2.21832e-12
ENSG00000108654	ENSG00000108654:1	DDX5	0.9774	Cells_Cultured_fibroblasts	9.93249e-17	2.21832e-12
ENSG00000108654	ENSG00000108654:1	DDX5	0.9767	Skin_Not_Sun_Exposed	9.93249e-17	2.21832e-12
ENSG00000108654	ENSG00000108654:1	DDX5	0.6272	Prostate	9.93249e-17	2.21832e-12
ENSG00000108654	ENSG00000108654:1	DDX5	0.9757	Esophagus_Muscularis	9.93249e-17	2.21832e-12
ENSG00000108654	ENSG00000108654:1	DDX5	0.9817	Artery_Tibial	9.93249e-17	2.21832e-12
ENSG00000108654	ENSG00000108654:1	DDX5	0.1373	Brain_Cortex	9.93249e-17	2.21832e-12
ENSG00000108654	ENSG00000108654:1	DDX5	0.9792	Artery_Aorta	9.93249e-17	2.21832e-12
ENSG00000108654	ENSG00000108654:1	DDX5	0.9585	Testis	9.93249e-17	2.21832e-12
ENSG00000108654	ENSG00000108654:1	DDX5	0.9751	Nerve_Tibial	9.93249e-17	2.21832e-12
ENSG00000108654	ENSG00000108654:1	DDX5	0.5875	Adipose_Visceral_Omentum	9.93249e-17	2.21832e-12
ENSG00000108654	ENSG00000108654:1	DDX5	0.9803	Whole_Blood	9.93249e-17	2.21832e-12
ENSG00000108654	ENSG00000108654:1	DDX5	0.6646	Pancreas	9.93249e-17	2.21832e-12
ENSG00000108654	ENSG00000108654:1	DDX5	0.981	Breast_Mammary_Tissue	9.93249e-17	2.21832e-12
ENSG00000108654	ENSG00000108654:1	DDX5	0.975	Lung	9.93249e-17	2.21832e-12
ENSG00000108654	ENSG00000108654:1	DDX5	0.9535	Small_Intestine_Terminal_Ileum	9.93249e-17	2.21832e-12
ENSG00000108654	ENSG00000108654:1	DDX5	0.9727	Thyroid	9.93249e-17	2.21832e-12
ENSG00000108654	ENSG00000108654:1	DDX5	0.7868	Liver	9.93249e-17	2.21832e-12
ENSG00000108654	ENSG00000108654:1	DDX5	0.9573	Heart_Atrial_Appendage	9.93249e-17	2.21832e-12
ENSG00000126785	ENSG00000126785:1	RHOJ	0.352	Cells_Cultured_fibroblasts	1.11209e-16	2.48375e-12
ENSG00000126785	ENSG00000126785:2	RHOJ	0.166	Artery_Tibial	1.11209e-16	2.48375e-12
ENSG00000138758	ENSG00000138758:1	SEPT11	0.8179	Pancreas	1.12096e-16	2.50355e-12
ENSG00000105655	ENSG00000105655:1	ISYNA1	0.1529	Brain_Anterior_cingulate_cortex_BA24	1.13401e-16	2.53269e-12
ENSG00000105655	ENSG00000105655:1	ISYNA1	0.2259	Artery_Coronary	1.13401e-16	2.53269e-12
ENSG00000105655	ENSG00000105655:1	ISYNA1	0.4861	Heart_Left_Ventricle	1.13401e-16	2.53269e-12
ENSG00000105655	ENSG00000105655:2	ISYNA1	0.1374	Stomach	1.13401e-16	2.53269e-12
ENSG00000105655	ENSG00000105655:1	ISYNA1	0.588	Muscle_Skeletal	1.13401e-16	2.53269e-12
ENSG00000105655	ENSG00000105655:1	ISYNA1	0.3474	Cells_Cultured_fibroblasts	1.13401e-16	2.53269e-12
ENSG00000105655	ENSG00000105655:1	ISYNA1	0.2542	Brain_Cerebellum	1.13401e-16	2.53269e-12
ENSG00000105655	ENSG00000105655:1	ISYNA1	0.157	Brain_Cortex	1.13401e-16	2.53269e-12
ENSG00000105655	ENSG00000105655:1	ISYNA1	0.2346	Ovary	1.13401e-16	2.53269e-12
ENSG00000166828	ENSG00000166828:1	SCNN1G	0.1009	Stomach	1.40964e-16	3.1483e-12
ENSG00000164885	ENSG00000164885:1	CDK5	0.1812	Testis	1.54151e-16	3.4428e-12
ENSG00000164885	ENSG00000164885:1	CDK5	0.1556	Lung	1.54151e-16	3.4428e-12
ENSG00000099246	ENSG00000099246:1	RAB18	0.2328	Thyroid	1.79036e-16	3.99859e-12
ENSG00000010803	ENSG00000010803:1	SCMH1	0.2161	Heart_Left_Ventricle	2.2073e-16	4.92979e-12
ENSG00000010803	ENSG00000010803:1	SCMH1	0.2494	Brain_Cortex	2.2073e-16	4.92979e-12
ENSG00000010803	ENSG00000010803:1	SCMH1	0.2412	Brain_Anterior_cingulate_cortex_BA24	2.2073e-16	4.92979e-12
ENSG00000010803	ENSG00000010803:1	SCMH1	0.1414	Brain_Nucleus_accumbens_basal_ganglia	2.2073e-16	4.92979e-12
ENSG00000010803	ENSG00000010803:1	SCMH1	0.1163	Brain_Hypothalamus	2.2073e-16	4.92979e-12
ENSG00000010803	ENSG00000010803:1	SCMH1	0.2362	Heart_Atrial_Appendage	2.2073e-16	4.92979e-12
ENSG00000010803	ENSG00000010803:1	SCMH1	0.1193	Cells_Cultured_fibroblasts	2.2073e-16	4.92979e-12
ENSG00000010803	ENSG00000010803:3	SCMH1	0.2335	Muscle_Skeletal	2.2073e-16	4.92979e-12
ENSG00000082641	ENSG00000082641:1	NFE2L1	0.4727	Muscle_Skeletal	2.81867e-16	6.29522e-12
ENSG00000082641	ENSG00000082641:2	NFE2L1	0.1868	Testis	2.81867e-16	6.29522e-12
ENSG00000103404	ENSG00000103404:1	USP31	0.2575	Adipose_Subcutaneous	2.82211e-16	6.3029e-12
ENSG00000103404	ENSG00000103404:1	USP31	0.2845	Adrenal_Gland	2.82211e-16	6.3029e-12
ENSG00000103404	ENSG00000103404:1	USP31	0.35	Muscle_Skeletal	2.82211e-16	6.3029e-12
ENSG00000103404	ENSG00000103404:1	USP31	0.2898	Esophagus_Gastroesophageal_Junction	2.82211e-16	6.3029e-12
ENSG00000103404	ENSG00000103404:1	USP31	0.2317	Testis	2.82211e-16	6.3029e-12
ENSG00000103404	ENSG00000103404:1	USP31	0.3157	Colon_Sigmoid	2.82211e-16	6.3029e-12
ENSG00000103404	ENSG00000103404:1	USP31	0.3066	Skin_Sun_Exposed	2.82211e-16	6.3029e-12
ENSG00000103404	ENSG00000103404:1	USP31	0.3261	Skin_Not_Sun_Exposed	2.82211e-16	6.3029e-12
ENSG00000103404	ENSG00000103404:1	USP31	0.4009	Artery_Aorta	2.82211e-16	6.3029e-12
ENSG00000103404	ENSG00000103404:1	USP31	0.3183	Artery_Coronary	2.82211e-16	6.3029e-12
ENSG00000103404	ENSG00000103404:1	USP31	0.3228	Colon_Transverse	2.82211e-16	6.3029e-12
ENSG00000103404	ENSG00000103404:1	USP31	0.1469	Small_Intestine_Terminal_Ileum	2.82211e-16	6.3029e-12
ENSG00000103404	ENSG00000103404:1	USP31	0.2939	Heart_Left_Ventricle	2.82211e-16	6.3029e-12
ENSG00000103404	ENSG00000103404:2	USP31	0.1672	Esophagus_Muscularis	2.82211e-16	6.3029e-12
ENSG00000103404	ENSG00000103404:2	USP31	0.3041	Esophagus_Mucosa	2.82211e-16	6.3029e-12
ENSG00000103404	ENSG00000103404:1	USP31	0.287	Spleen	2.82211e-16	6.3029e-12
ENSG00000103404	ENSG00000103404:1	USP31	0.4011	Artery_Tibial	2.82211e-16	6.3029e-12
ENSG00000103404	ENSG00000103404:1	USP31	0.356	Adipose_Visceral_Omentum	2.82211e-16	6.3029e-12
ENSG00000103404	ENSG00000103404:1	USP31	0.3455	Liver	2.82211e-16	6.3029e-12
ENSG00000103404	ENSG00000103404:1	USP31	0.1528	Pancreas	2.82211e-16	6.3029e-12
ENSG00000258890	ENSG00000258890:2	CEP95	0.1227	Heart_Atrial_Appendage	3.22368e-16	7.19976e-12
ENSG00000258890	ENSG00000258890:1	CEP95	0.1187	Brain_Spinal_cord_cervical_c-1	3.22368e-16	7.19976e-12
ENSG00000258890	ENSG00000258890:1	CEP95	0.8136	Brain_Frontal_Cortex_BA9	3.22368e-16	7.19976e-12
ENSG00000258890	ENSG00000258890:2	CEP95	0.9626	Skin_Sun_Exposed	3.22368e-16	7.19976e-12
ENSG00000258890	ENSG00000258890:1	CEP95	0.9709	Pituitary	3.22368e-16	7.19976e-12
ENSG00000258890	ENSG00000258890:1	CEP95	0.9754	Stomach	3.22368e-16	7.19976e-12
ENSG00000258890	ENSG00000258890:1	CEP95	0.1649	Brain_Putamen_basal_ganglia	3.22368e-16	7.19976e-12
ENSG00000258890	ENSG00000258890:2	CEP95	0.3502	Cells_Cultured_fibroblasts	3.22368e-16	7.19976e-12
ENSG00000258890	ENSG00000258890:1	CEP95	0.118	Artery_Coronary	3.22368e-16	7.19976e-12
ENSG00000258890	ENSG00000258890:1	CEP95	0.7982	Brain_Nucleus_accumbens_basal_ganglia	3.22368e-16	7.19976e-12
ENSG00000258890	ENSG00000258890:1	CEP95	0.5449	Esophagus_Mucosa	3.22368e-16	7.19976e-12
ENSG00000258890	ENSG00000258890:1	CEP95	0.9175	Prostate	3.22368e-16	7.19976e-12
ENSG00000258890	ENSG00000258890:1	CEP95	0.9776	Nerve_Tibial	3.22368e-16	7.19976e-12
ENSG00000258890	ENSG00000258890:1	CEP95	0.2063	Brain_Hippocampus	3.22368e-16	7.19976e-12
ENSG00000258890	ENSG00000258890:1	CEP95	0.981	Adipose_Subcutaneous	3.22368e-16	7.19976e-12
ENSG00000258890	ENSG00000258890:1	CEP95	0.9014	Adipose_Visceral_Omentum	3.22368e-16	7.19976e-12
ENSG00000258890	ENSG00000258890:1	CEP95	0.9781	Skin_Not_Sun_Exposed	3.22368e-16	7.19976e-12
ENSG00000258890	ENSG00000258890:1	CEP95	0.3121	Colon_Transverse	3.22368e-16	7.19976e-12
ENSG00000258890	ENSG00000258890:2	CEP95	0.134	Heart_Left_Ventricle	3.22368e-16	7.19976e-12
ENSG00000258890	ENSG00000258890:1	CEP95	0.9736	Breast_Mammary_Tissue	3.22368e-16	7.19976e-12
ENSG00000258890	ENSG00000258890:1	CEP95	0.9709	Pancreas	3.22368e-16	7.19976e-12
ENSG00000258890	ENSG00000258890:1	CEP95	0.9818	Artery_Tibial	3.22368e-16	7.19976e-12
ENSG00000258890	ENSG00000258890:1	CEP95	0.9582	Testis	3.22368e-16	7.19976e-12
ENSG00000258890	ENSG00000258890:2	CEP95	0.9778	Esophagus_Muscularis	3.22368e-16	7.19976e-12
ENSG00000258890	ENSG00000258890:1	CEP95	0.9755	Lung	3.22368e-16	7.19976e-12
ENSG00000258890	ENSG00000258890:2	CEP95	0.1372	Colon_Sigmoid	3.22368e-16	7.19976e-12
ENSG00000258890	ENSG00000258890:1	CEP95	0.1273	Brain_Amygdala	3.22368e-16	7.19976e-12
ENSG00000258890	ENSG00000258890:1	CEP95	0.9168	Brain_Cortex	3.22368e-16	7.19976e-12
ENSG00000258890	ENSG00000258890:1	CEP95	0.9794	Whole_Blood	3.22368e-16	7.19976e-12
ENSG00000258890	ENSG00000258890:1	CEP95	0.9448	Esophagus_Gastroesophageal_Junction	3.22368e-16	7.19976e-12
ENSG00000258890	ENSG00000258890:1	CEP95	0.1766	Brain_Hypothalamus	3.22368e-16	7.19976e-12
ENSG00000258890	ENSG00000258890:1	CEP95	0.98	Spleen	3.22368e-16	7.19976e-12
ENSG00000258890	ENSG00000258890:1	CEP95	0.9658	Small_Intestine_Terminal_Ileum	3.22368e-16	7.19976e-12
ENSG00000258890	ENSG00000258890:1	CEP95	0.9814	Artery_Aorta	3.22368e-16	7.19976e-12
ENSG00000258890	ENSG00000258890:1	CEP95	0.973	Thyroid	3.22368e-16	7.19976e-12
ENSG00000140455	ENSG00000140455:1	USP3	0.6927	Lung	3.59574e-16	8.03073e-12
ENSG00000004142	ENSG00000004142:1	POLDIP2	0.306	Whole_Blood	3.61377e-16	8.071e-12
ENSG00000004142	ENSG00000004142:1	POLDIP2	0.187	Adipose_Visceral_Omentum	3.61377e-16	8.071e-12
ENSG00000004142	ENSG00000004142:1	POLDIP2	0.3543	Kidney_Cortex	3.61377e-16	8.071e-12
ENSG00000004142	ENSG00000004142:1	POLDIP2	0.2995	Skin_Not_Sun_Exposed	3.61377e-16	8.071e-12
ENSG00000004142	ENSG00000004142:1	POLDIP2	0.3516	Minor_Salivary_Gland	3.61377e-16	8.071e-12
ENSG00000004142	ENSG00000004142:1	POLDIP2	0.327	Skin_Sun_Exposed	3.61377e-16	8.071e-12
ENSG00000004142	ENSG00000004142:1	POLDIP2	0.1026	Brain_Spinal_cord_cervical_c-1	3.61377e-16	8.071e-12
ENSG00000004142	ENSG00000004142:1	POLDIP2	0.1453	Artery_Tibial	3.61377e-16	8.071e-12
ENSG00000004142	ENSG00000004142:2	POLDIP2	0.3611	Esophagus_Muscularis	3.61377e-16	8.071e-12
ENSG00000004142	ENSG00000004142:1	POLDIP2	0.2415	Cells_Cultured_fibroblasts	3.61377e-16	8.071e-12
ENSG00000004142	ENSG00000004142:1	POLDIP2	0.3537	Spleen	3.61377e-16	8.071e-12
ENSG00000004142	ENSG00000004142:1	POLDIP2	0.4183	Adrenal_Gland	3.61377e-16	8.071e-12
ENSG00000004142	ENSG00000004142:1	POLDIP2	0.4138	Brain_Amygdala	3.61377e-16	8.071e-12
ENSG00000004142	ENSG00000004142:1	POLDIP2	0.1453	Brain_Hypothalamus	3.61377e-16	8.071e-12
ENSG00000004142	ENSG00000004142:1	POLDIP2	0.1098	Pituitary	3.61377e-16	8.071e-12
ENSG00000004142	ENSG00000004142:1	POLDIP2	0.2065	Adipose_Subcutaneous	3.61377e-16	8.071e-12
ENSG00000004142	ENSG00000004142:1	POLDIP2	0.1624	Lung	3.61377e-16	8.071e-12
ENSG00000004142	ENSG00000004142:1	POLDIP2	0.4063	Esophagus_Mucosa	3.61377e-16	8.071e-12
ENSG00000051825	ENSG00000051825:1	MPHOSPH9	0.1056	Colon_Sigmoid	3.82097e-16	8.53375e-12
ENSG00000051825	ENSG00000051825:1	MPHOSPH9	0.1465	Brain_Hippocampus	3.82097e-16	8.53375e-12
ENSG00000051825	ENSG00000051825:1	MPHOSPH9	0.1705	Ovary	3.82097e-16	8.53375e-12
ENSG00000051825	ENSG00000051825:1	MPHOSPH9	0.2639	Nerve_Tibial	3.82097e-16	8.53375e-12
ENSG00000051825	ENSG00000051825:1	MPHOSPH9	0.1355	Colon_Transverse	3.82097e-16	8.53375e-12
ENSG00000051825	ENSG00000051825:1	MPHOSPH9	0.2175	Pituitary	3.82097e-16	8.53375e-12
ENSG00000051825	ENSG00000051825:1	MPHOSPH9	0.1237	Adipose_Visceral_Omentum	3.82097e-16	8.53375e-12
ENSG00000051825	ENSG00000051825:1	MPHOSPH9	0.1157	Artery_Aorta	3.82097e-16	8.53375e-12
ENSG00000051825	ENSG00000051825:1	MPHOSPH9	0.129	Prostate	3.82097e-16	8.53375e-12
ENSG00000051825	ENSG00000051825:1	MPHOSPH9	0.2121	Lung	3.82097e-16	8.53375e-12
ENSG00000141568	ENSG00000141568:1	FOXK2	0.1417	Esophagus_Mucosa	4.39812e-16	9.82277e-12
ENSG00000138386	ENSG00000138386:1	NAB1	0.3077	Thyroid	4.98233e-16	1.11275e-11
ENSG00000196576	ENSG00000196576:1	PLXNB2	0.1674	Brain_Cerebellum	5.1964e-16	1.16056e-11
ENSG00000178177	ENSG00000178177:1	LCORL	0.4908	Brain_Cerebellum	5.30694e-16	1.18525e-11
ENSG00000178177	ENSG00000178177:1	LCORL	0.5858	Esophagus_Gastroesophageal_Junction	5.30694e-16	1.18525e-11
ENSG00000178177	ENSG00000178177:1	LCORL	0.2115	Brain_Cerebellar_Hemisphere	5.30694e-16	1.18525e-11
ENSG00000120833	ENSG00000120833:1	SOCS2	0.3888	Cells_Cultured_fibroblasts	6.11054e-16	1.36473e-11
ENSG00000159261	ENSG00000159261:2	CLDN14	0.1136	Nerve_Tibial	8.14201e-16	1.81844e-11
ENSG00000003137	ENSG00000003137:1	CYP26B1	0.6598	Adipose_Visceral_Omentum	8.39003e-16	1.87383e-11
ENSG00000121075	ENSG00000121075:1	TBX4	0.171	Adipose_Visceral_Omentum	8.56428e-16	1.91275e-11
ENSG00000244045	ENSG00000244045:1	TMEM199	0.4768	Artery_Aorta	9.78399e-16	2.18516e-11
ENSG00000244045	ENSG00000244045:1	TMEM199	0.5054	Stomach	9.78399e-16	2.18516e-11
ENSG00000244045	ENSG00000244045:1	TMEM199	0.4624	Skin_Not_Sun_Exposed	9.78399e-16	2.18516e-11
ENSG00000244045	ENSG00000244045:1	TMEM199	0.4022	Cells_EBV-transformed_lymphocytes	9.78399e-16	2.18516e-11
ENSG00000244045	ENSG00000244045:1	TMEM199	0.4113	Brain_Anterior_cingulate_cortex_BA24	9.78399e-16	2.18516e-11
ENSG00000244045	ENSG00000244045:1	TMEM199	0.3814	Nerve_Tibial	9.78399e-16	2.18516e-11
ENSG00000244045	ENSG00000244045:1	TMEM199	0.383	Brain_Nucleus_accumbens_basal_ganglia	9.78399e-16	2.18516e-11
ENSG00000244045	ENSG00000244045:1	TMEM199	0.2365	Brain_Frontal_Cortex_BA9	9.78399e-16	2.18516e-11
ENSG00000244045	ENSG00000244045:1	TMEM199	0.4074	Liver	9.78399e-16	2.18516e-11
ENSG00000244045	ENSG00000244045:1	TMEM199	0.3926	Breast_Mammary_Tissue	9.78399e-16	2.18516e-11
ENSG00000244045	ENSG00000244045:1	TMEM199	0.4633	Whole_Blood	9.78399e-16	2.18516e-11
ENSG00000244045	ENSG00000244045:1	TMEM199	0.536	Artery_Tibial	9.78399e-16	2.18516e-11
ENSG00000244045	ENSG00000244045:1	TMEM199	0.4463	Brain_Spinal_cord_cervical_c-1	9.78399e-16	2.18516e-11
ENSG00000244045	ENSG00000244045:1	TMEM199	0.4089	Esophagus_Gastroesophageal_Junction	9.78399e-16	2.18516e-11
ENSG00000244045	ENSG00000244045:1	TMEM199	0.4302	Spleen	9.78399e-16	2.18516e-11
ENSG00000244045	ENSG00000244045:1	TMEM199	0.3901	Brain_Putamen_basal_ganglia	9.78399e-16	2.18516e-11
ENSG00000244045	ENSG00000244045:1	TMEM199	0.2317	Prostate	9.78399e-16	2.18516e-11
ENSG00000244045	ENSG00000244045:1	TMEM199	0.3685	Brain_Hippocampus	9.78399e-16	2.18516e-11
ENSG00000244045	ENSG00000244045:1	TMEM199	0.2501	Cells_Cultured_fibroblasts	9.78399e-16	2.18516e-11
ENSG00000244045	ENSG00000244045:1	TMEM199	0.2669	Testis	9.78399e-16	2.18516e-11
ENSG00000244045	ENSG00000244045:1	TMEM199	0.5015	Skin_Sun_Exposed	9.78399e-16	2.18516e-11
ENSG00000244045	ENSG00000244045:1	TMEM199	0.3066	Brain_Substantia_nigra	9.78399e-16	2.18516e-11
ENSG00000244045	ENSG00000244045:1	TMEM199	0.3677	Heart_Atrial_Appendage	9.78399e-16	2.18516e-11
ENSG00000244045	ENSG00000244045:1	TMEM199	0.3676	Heart_Left_Ventricle	9.78399e-16	2.18516e-11
ENSG00000244045	ENSG00000244045:1	TMEM199	0.2074	Vagina	9.78399e-16	2.18516e-11
ENSG00000244045	ENSG00000244045:1	TMEM199	0.3916	Colon_Transverse	9.78399e-16	2.18516e-11
ENSG00000244045	ENSG00000244045:1	TMEM199	0.429	Colon_Sigmoid	9.78399e-16	2.18516e-11
ENSG00000244045	ENSG00000244045:1	TMEM199	0.389	Thyroid	9.78399e-16	2.18516e-11
ENSG00000244045	ENSG00000244045:1	TMEM199	0.4549	Esophagus_Mucosa	9.78399e-16	2.18516e-11
ENSG00000244045	ENSG00000244045:1	TMEM199	0.4968	Adipose_Visceral_Omentum	9.78399e-16	2.18516e-11
ENSG00000244045	ENSG00000244045:1	TMEM199	0.4659	Esophagus_Muscularis	9.78399e-16	2.18516e-11
ENSG00000244045	ENSG00000244045:1	TMEM199	0.4837	Lung	9.78399e-16	2.18516e-11
ENSG00000244045	ENSG00000244045:1	TMEM199	0.2565	Brain_Cortex	9.78399e-16	2.18516e-11
ENSG00000244045	ENSG00000244045:1	TMEM199	0.3915	Brain_Caudate_basal_ganglia	9.78399e-16	2.18516e-11
ENSG00000244045	ENSG00000244045:1	TMEM199	0.4134	Brain_Amygdala	9.78399e-16	2.18516e-11
ENSG00000244045	ENSG00000244045:1	TMEM199	0.4845	Adrenal_Gland	9.78399e-16	2.18516e-11
ENSG00000244045	ENSG00000244045:1	TMEM199	0.3403	Brain_Hypothalamus	9.78399e-16	2.18516e-11
ENSG00000244045	ENSG00000244045:1	TMEM199	0.4959	Adipose_Subcutaneous	9.78399e-16	2.18516e-11
ENSG00000164919	ENSG00000164919:1	COX6C	0.1187	Brain_Anterior_cingulate_cortex_BA24	1.07039e-15	2.39061e-11
ENSG00000164919	ENSG00000164919:1	COX6C	0.1038	Brain_Hypothalamus	1.07039e-15	2.39061e-11
ENSG00000164889	ENSG00000164889:1	SLC4A2	0.3285	Esophagus_Mucosa	1.41865e-15	3.16842e-11
ENSG00000164889	ENSG00000164889:1	SLC4A2	0.2251	Esophagus_Gastroesophageal_Junction	1.41865e-15	3.16842e-11
ENSG00000164889	ENSG00000164889:2	SLC4A2	0.2447	Adipose_Subcutaneous	1.41865e-15	3.16842e-11
ENSG00000164889	ENSG00000164889:2	SLC4A2	0.1929	Pituitary	1.41865e-15	3.16842e-11
ENSG00000164889	ENSG00000164889:1	SLC4A2	0.2287	Whole_Blood	1.41865e-15	3.16842e-11
ENSG00000164889	ENSG00000164889:1	SLC4A2	0.523	Stomach	1.41865e-15	3.16842e-11
ENSG00000164889	ENSG00000164889:1	SLC4A2	0.3448	Artery_Tibial	1.41865e-15	3.16842e-11
ENSG00000164889	ENSG00000164889:1	SLC4A2	0.4721	Pancreas	1.41865e-15	3.16842e-11
ENSG00000164889	ENSG00000164889:1	SLC4A2	0.9152	Brain_Cerebellar_Hemisphere	1.41865e-15	3.16842e-11
ENSG00000164889	ENSG00000164889:1	SLC4A2	0.1596	Brain_Cerebellum	1.41865e-15	3.16842e-11
ENSG00000164889	ENSG00000164889:1	SLC4A2	0.1505	Adrenal_Gland	1.41865e-15	3.16842e-11
ENSG00000164889	ENSG00000164889:1	SLC4A2	0.1807	Heart_Left_Ventricle	1.41865e-15	3.16842e-11
ENSG00000164889	ENSG00000164889:2	SLC4A2	0.4034	Esophagus_Muscularis	1.41865e-15	3.16842e-11
ENSG00000164889	ENSG00000164889:1	SLC4A2	0.127	Skin_Sun_Exposed	1.41865e-15	3.16842e-11
ENSG00000109079	ENSG00000109079:1	TNFAIP1	0.3001	Cells_Cultured_fibroblasts	1.84786e-15	4.12701e-11
ENSG00000109079	ENSG00000109079:1	TNFAIP1	0.2082	Artery_Coronary	1.84786e-15	4.12701e-11
ENSG00000270882	ENSG00000270882:1	HIST2H4A	0.1092	Artery_Aorta	1.93117e-15	4.31307e-11
ENSG00000163257	ENSG00000163257:1	DCAF16	0.1139	Liver	2.36923e-15	5.29144e-11
ENSG00000163257	ENSG00000163257:1	DCAF16	0.1239	Artery_Aorta	2.36923e-15	5.29144e-11
ENSG00000163257	ENSG00000163257:1	DCAF16	0.1129	Adrenal_Gland	2.36923e-15	5.29144e-11
ENSG00000163257	ENSG00000163257:1	DCAF16	0.1058	Esophagus_Gastroesophageal_Junction	2.36923e-15	5.29144e-11
ENSG00000163257	ENSG00000163257:1	DCAF16	0.1171	Artery_Coronary	2.36923e-15	5.29144e-11
ENSG00000163257	ENSG00000163257:1	DCAF16	0.1367	Muscle_Skeletal	2.36923e-15	5.29144e-11
ENSG00000163257	ENSG00000163257:1	DCAF16	0.113	Ovary	2.36923e-15	5.29144e-11
ENSG00000163257	ENSG00000163257:1	DCAF16	0.12	Spleen	2.36923e-15	5.29144e-11
ENSG00000186510	ENSG00000186510:1	CLCNKA	0.405	Artery_Tibial	2.93595e-15	6.55714e-11
ENSG00000111328	ENSG00000111328:1	CDK2AP1	0.1681	Artery_Coronary	3.81041e-15	8.51018e-11
ENSG00000111328	ENSG00000111328:1	CDK2AP1	0.3659	Adipose_Visceral_Omentum	3.81041e-15	8.51018e-11
ENSG00000111328	ENSG00000111328:1	CDK2AP1	0.4002	Cells_Cultured_fibroblasts	3.81041e-15	8.51018e-11
ENSG00000111328	ENSG00000111328:1	CDK2AP1	0.3254	Colon_Transverse	3.81041e-15	8.51018e-11
ENSG00000111328	ENSG00000111328:1	CDK2AP1	0.3355	Stomach	3.81041e-15	8.51018e-11
ENSG00000111328	ENSG00000111328:1	CDK2AP1	0.3944	Liver	3.81041e-15	8.51018e-11
ENSG00000111328	ENSG00000111328:1	CDK2AP1	0.3236	Esophagus_Muscularis	3.81041e-15	8.51018e-11
ENSG00000111328	ENSG00000111328:1	CDK2AP1	0.1967	Prostate	3.81041e-15	8.51018e-11
ENSG00000111328	ENSG00000111328:1	CDK2AP1	0.3178	Esophagus_Mucosa	3.81041e-15	8.51018e-11
ENSG00000111328	ENSG00000111328:2	CDK2AP1	0.3965	Whole_Blood	3.81041e-15	8.51018e-11
ENSG00000111328	ENSG00000111328:1	CDK2AP1	0.2276	Spleen	3.81041e-15	8.51018e-11
ENSG00000111328	ENSG00000111328:1	CDK2AP1	0.2191	Breast_Mammary_Tissue	3.81041e-15	8.51018e-11
ENSG00000111328	ENSG00000111328:1	CDK2AP1	0.2216	Vagina	3.81041e-15	8.51018e-11
ENSG00000111328	ENSG00000111328:1	CDK2AP1	0.2891	Adipose_Subcutaneous	3.81041e-15	8.51018e-11
ENSG00000111328	ENSG00000111328:1	CDK2AP1	0.2539	Minor_Salivary_Gland	3.81041e-15	8.51018e-11
ENSG00000111328	ENSG00000111328:1	CDK2AP1	0.2205	Thyroid	3.81041e-15	8.51018e-11
ENSG00000111328	ENSG00000111328:1	CDK2AP1	0.1601	Heart_Atrial_Appendage	3.81041e-15	8.51018e-11
ENSG00000111328	ENSG00000111328:1	CDK2AP1	0.3602	Skin_Not_Sun_Exposed	3.81041e-15	8.51018e-11
ENSG00000111328	ENSG00000111328:1	CDK2AP1	0.2035	Nerve_Tibial	3.81041e-15	8.51018e-11
ENSG00000111328	ENSG00000111328:1	CDK2AP1	0.371	Esophagus_Gastroesophageal_Junction	3.81041e-15	8.51018e-11
ENSG00000111328	ENSG00000111328:1	CDK2AP1	0.3635	Skin_Sun_Exposed	3.81041e-15	8.51018e-11
ENSG00000111328	ENSG00000111328:1	CDK2AP1	0.3033	Lung	3.81041e-15	8.51018e-11
ENSG00000111328	ENSG00000111328:1	CDK2AP1	0.2458	Small_Intestine_Terminal_Ileum	3.81041e-15	8.51018e-11
ENSG00000111328	ENSG00000111328:1	CDK2AP1	0.3688	Colon_Sigmoid	3.81041e-15	8.51018e-11
ENSG00000111328	ENSG00000111328:1	CDK2AP1	0.1563	Cells_EBV-transformed_lymphocytes	3.81041e-15	8.51018e-11
ENSG00000111328	ENSG00000111328:1	CDK2AP1	0.2112	Artery_Aorta	3.81041e-15	8.51018e-11
ENSG00000111328	ENSG00000111328:1	CDK2AP1	0.1921	Uterus	3.81041e-15	8.51018e-11
ENSG00000111328	ENSG00000111328:1	CDK2AP1	0.3644	Artery_Tibial	3.81041e-15	8.51018e-11
ENSG00000111328	ENSG00000111328:1	CDK2AP1	0.3172	Adrenal_Gland	3.81041e-15	8.51018e-11
ENSG00000111328	ENSG00000111328:1	CDK2AP1	0.3364	Pancreas	3.81041e-15	8.51018e-11
ENSG00000183955	ENSG00000183955:1	KMT5A	0.1402	Artery_Aorta	4.07898e-15	9.11e-11
ENSG00000183955	ENSG00000183955:1	KMT5A	0.1394	Muscle_Skeletal	4.07898e-15	9.11e-11
ENSG00000183955	ENSG00000183955:1	KMT5A	0.2452	Heart_Atrial_Appendage	4.07898e-15	9.11e-11
ENSG00000183955	ENSG00000183955:1	KMT5A	0.1818	Esophagus_Mucosa	4.07898e-15	9.11e-11
ENSG00000183955	ENSG00000183955:2	KMT5A	0.1081	Pituitary	4.07898e-15	9.11e-11
ENSG00000183955	ENSG00000183955:2	KMT5A	0.2347	Skin_Sun_Exposed	4.07898e-15	9.11e-11
ENSG00000183955	ENSG00000183955:1	KMT5A	0.1515	Brain_Cerebellar_Hemisphere	4.07898e-15	9.11e-11
ENSG00000183955	ENSG00000183955:1	KMT5A	0.2231	Skin_Not_Sun_Exposed	4.07898e-15	9.11e-11
ENSG00000183955	ENSG00000183955:2	KMT5A	0.1512	Artery_Tibial	4.07898e-15	9.11e-11
ENSG00000103197	ENSG00000103197:1	TSC2	0.1124	Brain_Cerebellum	4.42896e-15	9.89165e-11
ENSG00000145216	ENSG00000145216:1	FIP1L1	0.2458	Muscle_Skeletal	9.55502e-15	2.13402e-10
ENSG00000061455	ENSG00000061455:1	PRDM6	0.1138	Brain_Amygdala	1.04742e-14	2.33932e-10
ENSG00000061455	ENSG00000061455:2	PRDM6	0.1064	Adipose_Visceral_Omentum	1.04742e-14	2.33932e-10
ENSG00000185386	ENSG00000185386:1	MAPK11	0.1319	Brain_Cerebellar_Hemisphere	1.059e-14	2.36516e-10
ENSG00000009724	ENSG00000009724:1	MASP2	0.1449	Prostate	1.30126e-14	2.90623e-10
ENSG00000156103	ENSG00000156103:1	MMP16	0.4974	Breast_Mammary_Tissue	1.36836e-14	3.05608e-10
ENSG00000156103	ENSG00000156103:1	MMP16	0.3016	Minor_Salivary_Gland	1.36836e-14	3.05608e-10
ENSG00000156103	ENSG00000156103:1	MMP16	0.237	Ovary	1.36836e-14	3.05608e-10
ENSG00000156103	ENSG00000156103:1	MMP16	0.3367	Skin_Not_Sun_Exposed	1.36836e-14	3.05608e-10
ENSG00000156103	ENSG00000156103:1	MMP16	0.3104	Colon_Transverse	1.36836e-14	3.05608e-10
ENSG00000156103	ENSG00000156103:1	MMP16	0.51	Stomach	1.36836e-14	3.05608e-10
ENSG00000156103	ENSG00000156103:1	MMP16	0.4248	Pancreas	1.36836e-14	3.05608e-10
ENSG00000156103	ENSG00000156103:1	MMP16	0.165	Kidney_Cortex	1.36836e-14	3.05608e-10
ENSG00000156103	ENSG00000156103:1	MMP16	0.4354	Adipose_Subcutaneous	1.36836e-14	3.05608e-10
ENSG00000156103	ENSG00000156103:1	MMP16	0.1144	Colon_Sigmoid	1.36836e-14	3.05608e-10
ENSG00000156103	ENSG00000156103:2	MMP16	0.2176	Thyroid	1.36836e-14	3.05608e-10
ENSG00000156103	ENSG00000156103:1	MMP16	0.2794	Artery_Coronary	1.36836e-14	3.05608e-10
ENSG00000156103	ENSG00000156103:2	MMP16	0.3165	Artery_Aorta	1.36836e-14	3.05608e-10
ENSG00000156103	ENSG00000156103:1	MMP16	0.1784	Adrenal_Gland	1.36836e-14	3.05608e-10
ENSG00000156103	ENSG00000156103:1	MMP16	0.1788	Spleen	1.36836e-14	3.05608e-10
ENSG00000156103	ENSG00000156103:1	MMP16	0.4211	Heart_Left_Ventricle	1.36836e-14	3.05608e-10
ENSG00000156103	ENSG00000156103:1	MMP16	0.4925	Esophagus_Mucosa	1.36836e-14	3.05608e-10
ENSG00000156103	ENSG00000156103:1	MMP16	0.1582	Heart_Atrial_Appendage	1.36836e-14	3.05608e-10
ENSG00000156103	ENSG00000156103:1	MMP16	0.2991	Cells_Cultured_fibroblasts	1.36836e-14	3.05608e-10
ENSG00000156103	ENSG00000156103:1	MMP16	0.4546	Pituitary	1.36836e-14	3.05608e-10
ENSG00000156103	ENSG00000156103:1	MMP16	0.5273	Lung	1.36836e-14	3.05608e-10
ENSG00000156103	ENSG00000156103:1	MMP16	0.4754	Adipose_Visceral_Omentum	1.36836e-14	3.05608e-10
ENSG00000156103	ENSG00000156103:1	MMP16	0.4126	Skin_Sun_Exposed	1.36836e-14	3.05608e-10
ENSG00000156103	ENSG00000156103:1	MMP16	0.2233	Small_Intestine_Terminal_Ileum	1.36836e-14	3.05608e-10
ENSG00000156103	ENSG00000156103:1	MMP16	0.1243	Brain_Nucleus_accumbens_basal_ganglia	1.36836e-14	3.05608e-10
ENSG00000156103	ENSG00000156103:1	MMP16	0.1697	Prostate	1.36836e-14	3.05608e-10
ENSG00000187961	ENSG00000187961:1	KLHL17	0.7406	Lung	1.43876e-14	3.21332e-10
ENSG00000187961	ENSG00000187961:1	KLHL17	0.9261	Artery_Tibial	1.43876e-14	3.21332e-10
ENSG00000187961	ENSG00000187961:1	KLHL17	0.9538	Breast_Mammary_Tissue	1.43876e-14	3.21332e-10
ENSG00000187961	ENSG00000187961:2	KLHL17	0.2117	Heart_Left_Ventricle	1.43876e-14	3.21332e-10
ENSG00000187961	ENSG00000187961:1	KLHL17	0.1151	Brain_Caudate_basal_ganglia	1.43876e-14	3.21332e-10
ENSG00000187961	ENSG00000187961:1	KLHL17	0.5013	Nerve_Tibial	1.43876e-14	3.21332e-10
ENSG00000187961	ENSG00000187961:1	KLHL17	0.937	Artery_Aorta	1.43876e-14	3.21332e-10
ENSG00000187961	ENSG00000187961:1	KLHL17	0.785	Pancreas	1.43876e-14	3.21332e-10
ENSG00000187961	ENSG00000187961:1	KLHL17	0.7755	Colon_Transverse	1.43876e-14	3.21332e-10
ENSG00000187961	ENSG00000187961:1	KLHL17	0.8587	Brain_Cerebellar_Hemisphere	1.43876e-14	3.21332e-10
ENSG00000187961	ENSG00000187961:1	KLHL17	0.1466	Minor_Salivary_Gland	1.43876e-14	3.21332e-10
ENSG00000187961	ENSG00000187961:1	KLHL17	0.5638	Pituitary	1.43876e-14	3.21332e-10
ENSG00000187961	ENSG00000187961:1	KLHL17	0.7619	Prostate	1.43876e-14	3.21332e-10
ENSG00000187961	ENSG00000187961:1	KLHL17	0.302	Stomach	1.43876e-14	3.21332e-10
ENSG00000187961	ENSG00000187961:1	KLHL17	0.7756	Heart_Atrial_Appendage	1.43876e-14	3.21332e-10
ENSG00000187961	ENSG00000187961:1	KLHL17	0.2605	Brain_Anterior_cingulate_cortex_BA24	1.43876e-14	3.21332e-10
ENSG00000187961	ENSG00000187961:1	KLHL17	0.6906	Brain_Cerebellum	1.43876e-14	3.21332e-10
ENSG00000187961	ENSG00000187961:1	KLHL17	0.8456	Esophagus_Muscularis	1.43876e-14	3.21332e-10
ENSG00000187961	ENSG00000187961:1	KLHL17	0.9417	Cells_Cultured_fibroblasts	1.43876e-14	3.21332e-10
ENSG00000187961	ENSG00000187961:1	KLHL17	0.7729	Colon_Sigmoid	1.43876e-14	3.21332e-10
ENSG00000187961	ENSG00000187961:1	KLHL17	0.7668	Testis	1.43876e-14	3.21332e-10
ENSG00000187961	ENSG00000187961:1	KLHL17	0.1267	Heart_Left_Ventricle	1.43876e-14	3.21332e-10
ENSG00000187961	ENSG00000187961:1	KLHL17	0.9433	Whole_Blood	1.43876e-14	3.21332e-10
ENSG00000187961	ENSG00000187961:1	KLHL17	0.1939	Small_Intestine_Terminal_Ileum	1.43876e-14	3.21332e-10
ENSG00000187961	ENSG00000187961:1	KLHL17	0.9218	Esophagus_Mucosa	1.43876e-14	3.21332e-10
ENSG00000187961	ENSG00000187961:1	KLHL17	0.1729	Ovary	1.43876e-14	3.21332e-10
ENSG00000187961	ENSG00000187961:1	KLHL17	0.6471	Cells_EBV-transformed_lymphocytes	1.43876e-14	3.21332e-10
ENSG00000187961	ENSG00000187961:1	KLHL17	0.6661	Skin_Sun_Exposed	1.43876e-14	3.21332e-10
ENSG00000187961	ENSG00000187961:1	KLHL17	0.6207	Thyroid	1.43876e-14	3.21332e-10
ENSG00000187961	ENSG00000187961:1	KLHL17	0.8681	Adipose_Visceral_Omentum	1.43876e-14	3.21332e-10
ENSG00000187961	ENSG00000187961:2	KLHL17	0.7914	Adrenal_Gland	1.43876e-14	3.21332e-10
ENSG00000187961	ENSG00000187961:1	KLHL17	0.7327	Spleen	1.43876e-14	3.21332e-10
ENSG00000187961	ENSG00000187961:1	KLHL17	0.4296	Muscle_Skeletal	1.43876e-14	3.21332e-10
ENSG00000187961	ENSG00000187961:1	KLHL17	0.6993	Skin_Not_Sun_Exposed	1.43876e-14	3.21332e-10
ENSG00000139697	ENSG00000139697:1	SBNO1	0.1252	Brain_Frontal_Cortex_BA9	1.47339e-14	3.29067e-10
ENSG00000139697	ENSG00000139697:3	SBNO1	0.323	Cells_Cultured_fibroblasts	1.47339e-14	3.29067e-10
ENSG00000139697	ENSG00000139697:2	SBNO1	0.1556	Liver	1.47339e-14	3.29067e-10
ENSG00000011105	ENSG00000011105:1	TSPAN9	0.2867	Small_Intestine_Terminal_Ileum	1.66415e-14	3.7167e-10
ENSG00000011105	ENSG00000011105:2	TSPAN9	0.1625	Ovary	1.66415e-14	3.7167e-10
ENSG00000011105	ENSG00000011105:2	TSPAN9	0.8045	Nerve_Tibial	1.66415e-14	3.7167e-10
ENSG00000163050	ENSG00000163050:1	COQ8A	0.106	Skin_Not_Sun_Exposed	1.70128e-14	3.79965e-10
ENSG00000163050	ENSG00000163050:2	COQ8A	0.1372	Brain_Anterior_cingulate_cortex_BA24	1.70128e-14	3.79965e-10
ENSG00000163050	ENSG00000163050:2	COQ8A	0.5439	Artery_Coronary	1.70128e-14	3.79965e-10
ENSG00000163050	ENSG00000163050:1	COQ8A	0.3567	Brain_Cerebellar_Hemisphere	1.70128e-14	3.79965e-10
ENSG00000163050	ENSG00000163050:2	COQ8A	0.3292	Uterus	1.70128e-14	3.79965e-10
ENSG00000163050	ENSG00000163050:1	COQ8A	0.555	Prostate	1.70128e-14	3.79965e-10
ENSG00000163050	ENSG00000163050:1	COQ8A	0.1909	Adipose_Visceral_Omentum	1.70128e-14	3.79965e-10
ENSG00000163050	ENSG00000163050:1	COQ8A	0.2527	Skin_Sun_Exposed	1.70128e-14	3.79965e-10
ENSG00000163050	ENSG00000163050:3	COQ8A	0.1144	Artery_Aorta	1.70128e-14	3.79965e-10
ENSG00000163050	ENSG00000163050:2	COQ8A	0.3594	Pituitary	1.70128e-14	3.79965e-10
ENSG00000163050	ENSG00000163050:2	COQ8A	0.1359	Brain_Caudate_basal_ganglia	1.70128e-14	3.79965e-10
ENSG00000163050	ENSG00000163050:1	COQ8A	0.4488	Brain_Cortex	1.70128e-14	3.79965e-10
ENSG00000163050	ENSG00000163050:1	COQ8A	0.4438	Esophagus_Gastroesophageal_Junction	1.70128e-14	3.79965e-10
ENSG00000121797	ENSG00000121797:1	CCRL2	0.5439	Whole_Blood	1.71225e-14	3.82414e-10
ENSG00000052802	ENSG00000052802:1	MSMO1	0.3045	Pituitary	1.97784e-14	4.41731e-10
ENSG00000052802	ENSG00000052802:1	MSMO1	0.1065	Brain_Cortex	1.97784e-14	4.41731e-10
ENSG00000052802	ENSG00000052802:1	MSMO1	0.8317	Brain_Caudate_basal_ganglia	1.97784e-14	4.41731e-10
ENSG00000052802	ENSG00000052802:1	MSMO1	0.7726	Brain_Putamen_basal_ganglia	1.97784e-14	4.41731e-10
ENSG00000108001	ENSG00000108001:1	EBF3	0.3252	Muscle_Skeletal	2.12976e-14	4.75662e-10
ENSG00000100239	ENSG00000100239:2	PPP6R2	0.3059	Brain_Spinal_cord_cervical_c-1	2.22674e-14	4.97321e-10
ENSG00000100239	ENSG00000100239:1	PPP6R2	0.1684	Brain_Hypothalamus	2.22674e-14	4.97321e-10
ENSG00000100239	ENSG00000100239:2	PPP6R2	0.3677	Muscle_Skeletal	2.22674e-14	4.97321e-10
ENSG00000100239	ENSG00000100239:1	PPP6R2	0.4045	Brain_Putamen_basal_ganglia	2.22674e-14	4.97321e-10
ENSG00000100239	ENSG00000100239:1	PPP6R2	0.3627	Brain_Caudate_basal_ganglia	2.22674e-14	4.97321e-10
ENSG00000100239	ENSG00000100239:1	PPP6R2	0.1283	Brain_Cortex	2.22674e-14	4.97321e-10
ENSG00000100239	ENSG00000100239:1	PPP6R2	0.1592	Brain_Amygdala	2.22674e-14	4.97321e-10
ENSG00000079215	ENSG00000079215:1	SLC1A3	0.327	Cells_Cultured_fibroblasts	2.81628e-14	6.28988e-10
ENSG00000169504	ENSG00000169504:2	CLIC4	0.1812	Cells_Cultured_fibroblasts	3.21283e-14	7.17554e-10
ENSG00000169504	ENSG00000169504:1	CLIC4	0.3397	Heart_Atrial_Appendage	3.21283e-14	7.17554e-10
ENSG00000169504	ENSG00000169504:2	CLIC4	0.1286	Adrenal_Gland	3.21283e-14	7.17554e-10
ENSG00000169504	ENSG00000169504:1	CLIC4	0.1911	Adipose_Subcutaneous	3.21283e-14	7.17554e-10
ENSG00000169504	ENSG00000169504:1	CLIC4	0.6413	Pancreas	3.21283e-14	7.17554e-10
ENSG00000094914	ENSG00000094914:1	AAAS	0.2026	Ovary	3.23963e-14	7.23539e-10
ENSG00000099308	ENSG00000099308:1	MAST3	0.1223	Thyroid	5.14056e-14	1.14809e-09
ENSG00000087085	ENSG00000087085:1	ACHE	0.5342	Esophagus_Mucosa	5.36447e-14	1.1981e-09
ENSG00000087085	ENSG00000087085:1	ACHE	0.6553	Liver	5.36447e-14	1.1981e-09
ENSG00000087085	ENSG00000087085:2	ACHE	0.6371	Artery_Aorta	5.36447e-14	1.1981e-09
ENSG00000087085	ENSG00000087085:2	ACHE	0.215	Heart_Atrial_Appendage	5.36447e-14	1.1981e-09
ENSG00000087085	ENSG00000087085:1	ACHE	0.1107	Brain_Caudate_basal_ganglia	5.36447e-14	1.1981e-09
ENSG00000087085	ENSG00000087085:2	ACHE	0.1554	Thyroid	5.36447e-14	1.1981e-09
ENSG00000087085	ENSG00000087085:2	ACHE	0.2169	Nerve_Tibial	5.36447e-14	1.1981e-09
ENSG00000169894	ENSG00000169894:1	MUC3A	0.6566	Liver	6.71551e-14	1.49984e-09
ENSG00000133612	ENSG00000133612:1	AGAP3	0.257	Colon_Sigmoid	1.09773e-13	2.45166e-09
ENSG00000130921	ENSG00000130921:1	C12orf65	0.1296	Colon_Sigmoid	1.17423e-13	2.62252e-09
ENSG00000130921	ENSG00000130921:1	C12orf65	0.2139	Esophagus_Gastroesophageal_Junction	1.17423e-13	2.62252e-09
ENSG00000134982	ENSG00000134982:1	APC	0.2298	Esophagus_Gastroesophageal_Junction	1.20181e-13	2.68412e-09
ENSG00000134982	ENSG00000134982:1	APC	0.1464	Nerve_Tibial	1.20181e-13	2.68412e-09
ENSG00000134982	ENSG00000134982:1	APC	0.4237	Adrenal_Gland	1.20181e-13	2.68412e-09
ENSG00000134982	ENSG00000134982:2	APC	0.4004	Muscle_Skeletal	1.20181e-13	2.68412e-09
ENSG00000134982	ENSG00000134982:1	APC	0.2598	Cells_Cultured_fibroblasts	1.20181e-13	2.68412e-09
ENSG00000134982	ENSG00000134982:1	APC	0.168	Pancreas	1.20181e-13	2.68412e-09
ENSG00000171488	ENSG00000171488:1	LRRC8C	0.4555	Heart_Left_Ventricle	1.23519e-13	2.75868e-09
ENSG00000180806	ENSG00000180806:1	HOXC9	0.5807	Adipose_Visceral_Omentum	1.33902e-13	2.99057e-09
ENSG00000180806	ENSG00000180806:1	HOXC9	0.385	Lung	1.33902e-13	2.99057e-09
ENSG00000180806	ENSG00000180806:1	HOXC9	0.7312	Nerve_Tibial	1.33902e-13	2.99057e-09
ENSG00000180806	ENSG00000180806:1	HOXC9	0.2269	Breast_Mammary_Tissue	1.33902e-13	2.99057e-09
ENSG00000180806	ENSG00000180806:1	HOXC9	0.5821	Adrenal_Gland	1.33902e-13	2.99057e-09
ENSG00000152219	ENSG00000152219:2	ARL14EP	0.1042	Colon_Sigmoid	1.38099e-13	3.08429e-09
ENSG00000152219	ENSG00000152219:2	ARL14EP	0.1349	Artery_Tibial	1.38099e-13	3.08429e-09
ENSG00000152219	ENSG00000152219:2	ARL14EP	0.1826	Breast_Mammary_Tissue	1.38099e-13	3.08429e-09
ENSG00000152219	ENSG00000152219:2	ARL14EP	0.1727	Small_Intestine_Terminal_Ileum	1.38099e-13	3.08429e-09
ENSG00000152219	ENSG00000152219:2	ARL14EP	0.1588	Adipose_Subcutaneous	1.38099e-13	3.08429e-09
ENSG00000152219	ENSG00000152219:2	ARL14EP	0.133	Brain_Frontal_Cortex_BA9	1.38099e-13	3.08429e-09
ENSG00000152219	ENSG00000152219:1	ARL14EP	0.106	Minor_Salivary_Gland	1.38099e-13	3.08429e-09
ENSG00000152219	ENSG00000152219:2	ARL14EP	0.1045	Nerve_Tibial	1.38099e-13	3.08429e-09
ENSG00000152219	ENSG00000152219:2	ARL14EP	0.116	Lung	1.38099e-13	3.08429e-09
ENSG00000152219	ENSG00000152219:3	ARL14EP	0.1325	Thyroid	1.38099e-13	3.08429e-09
ENSG00000188130	ENSG00000188130:3	MAPK12	0.1428	Stomach	1.50272e-13	3.35618e-09
ENSG00000143801	ENSG00000143801:1	PSEN2	0.2572	Heart_Atrial_Appendage	1.68132e-13	3.75506e-09
ENSG00000143801	ENSG00000143801:1	PSEN2	0.2943	Brain_Anterior_cingulate_cortex_BA24	1.68132e-13	3.75506e-09
ENSG00000143801	ENSG00000143801:1	PSEN2	0.4577	Spleen	1.68132e-13	3.75506e-09
ENSG00000143801	ENSG00000143801:1	PSEN2	0.4571	Brain_Caudate_basal_ganglia	1.68132e-13	3.75506e-09
ENSG00000143801	ENSG00000143801:1	PSEN2	0.1782	Colon_Transverse	1.68132e-13	3.75506e-09
ENSG00000143801	ENSG00000143801:1	PSEN2	0.362	Lung	1.68132e-13	3.75506e-09
ENSG00000143801	ENSG00000143801:1	PSEN2	0.3131	Brain_Putamen_basal_ganglia	1.68132e-13	3.75506e-09
ENSG00000143801	ENSG00000143801:1	PSEN2	0.2494	Brain_Cortex	1.68132e-13	3.75506e-09
ENSG00000143801	ENSG00000143801:1	PSEN2	0.3212	Esophagus_Mucosa	1.68132e-13	3.75506e-09
ENSG00000143801	ENSG00000143801:1	PSEN2	0.3114	Brain_Nucleus_accumbens_basal_ganglia	1.68132e-13	3.75506e-09
ENSG00000143801	ENSG00000143801:1	PSEN2	0.8304	Brain_Frontal_Cortex_BA9	1.68132e-13	3.75506e-09
ENSG00000143801	ENSG00000143801:1	PSEN2	0.3971	Adrenal_Gland	1.68132e-13	3.75506e-09
ENSG00000143801	ENSG00000143801:1	PSEN2	0.1832	Testis	1.68132e-13	3.75506e-09
ENSG00000143801	ENSG00000143801:1	PSEN2	0.4265	Pituitary	1.68132e-13	3.75506e-09
ENSG00000143801	ENSG00000143801:1	PSEN2	0.1412	Cells_EBV-transformed_lymphocytes	1.68132e-13	3.75506e-09
ENSG00000122778	ENSG00000122778:1	KIAA1549	0.437	Pituitary	1.77969e-13	3.97475e-09
ENSG00000122778	ENSG00000122778:1	KIAA1549	0.2869	Artery_Aorta	1.77969e-13	3.97475e-09
ENSG00000122778	ENSG00000122778:3	KIAA1549	0.3675	Muscle_Skeletal	1.77969e-13	3.97475e-09
ENSG00000122778	ENSG00000122778:1	KIAA1549	0.2877	Esophagus_Mucosa	1.77969e-13	3.97475e-09
ENSG00000122778	ENSG00000122778:1	KIAA1549	0.4938	Adipose_Visceral_Omentum	1.77969e-13	3.97475e-09
ENSG00000122778	ENSG00000122778:2	KIAA1549	0.5978	Muscle_Skeletal	1.77969e-13	3.97475e-09
ENSG00000122778	ENSG00000122778:1	KIAA1549	0.1873	Heart_Left_Ventricle	1.77969e-13	3.97475e-09
ENSG00000122778	ENSG00000122778:1	KIAA1549	0.1356	Cells_EBV-transformed_lymphocytes	1.77969e-13	3.97475e-09
ENSG00000122778	ENSG00000122778:1	KIAA1549	0.1741	Spleen	1.77969e-13	3.97475e-09
ENSG00000122778	ENSG00000122778:1	KIAA1549	0.2457	Adipose_Subcutaneous	1.77969e-13	3.97475e-09
ENSG00000176125	ENSG00000176125:2	UFSP1	0.2275	Heart_Left_Ventricle	2.12846e-13	4.7537e-09
ENSG00000176125	ENSG00000176125:1	UFSP1	0.4446	Skin_Not_Sun_Exposed	2.12846e-13	4.7537e-09
ENSG00000176125	ENSG00000176125:1	UFSP1	0.4688	Esophagus_Mucosa	2.12846e-13	4.7537e-09
ENSG00000176125	ENSG00000176125:3	UFSP1	0.2513	Cells_Cultured_fibroblasts	2.12846e-13	4.7537e-09
ENSG00000176125	ENSG00000176125:1	UFSP1	0.5075	Whole_Blood	2.12846e-13	4.7537e-09
ENSG00000176125	ENSG00000176125:1	UFSP1	0.4864	Nerve_Tibial	2.12846e-13	4.7537e-09
ENSG00000176125	ENSG00000176125:1	UFSP1	0.4449	Colon_Sigmoid	2.12846e-13	4.7537e-09
ENSG00000176125	ENSG00000176125:1	UFSP1	0.296	Brain_Hypothalamus	2.12846e-13	4.7537e-09
ENSG00000176125	ENSG00000176125:1	UFSP1	0.4916	Skin_Sun_Exposed	2.12846e-13	4.7537e-09
ENSG00000176125	ENSG00000176125:1	UFSP1	0.5254	Breast_Mammary_Tissue	2.12846e-13	4.7537e-09
ENSG00000176125	ENSG00000176125:1	UFSP1	0.536	Adipose_Visceral_Omentum	2.12846e-13	4.7537e-09
ENSG00000176125	ENSG00000176125:1	UFSP1	0.3219	Brain_Cerebellar_Hemisphere	2.12846e-13	4.7537e-09
ENSG00000176125	ENSG00000176125:1	UFSP1	0.3068	Stomach	2.12846e-13	4.7537e-09
ENSG00000176125	ENSG00000176125:1	UFSP1	0.2581	Heart_Atrial_Appendage	2.12846e-13	4.7537e-09
ENSG00000176125	ENSG00000176125:2	UFSP1	0.1659	Muscle_Skeletal	2.12846e-13	4.7537e-09
ENSG00000176125	ENSG00000176125:1	UFSP1	0.4633	Brain_Amygdala	2.12846e-13	4.7537e-09
ENSG00000176125	ENSG00000176125:1	UFSP1	0.27	Vagina	2.12846e-13	4.7537e-09
ENSG00000176125	ENSG00000176125:1	UFSP1	0.2776	Thyroid	2.12846e-13	4.7537e-09
ENSG00000176125	ENSG00000176125:1	UFSP1	0.2017	Brain_Frontal_Cortex_BA9	2.12846e-13	4.7537e-09
ENSG00000176125	ENSG00000176125:1	UFSP1	0.4294	Artery_Tibial	2.12846e-13	4.7537e-09
ENSG00000176125	ENSG00000176125:1	UFSP1	0.3104	Adipose_Subcutaneous	2.12846e-13	4.7537e-09
ENSG00000176125	ENSG00000176125:1	UFSP1	0.5016	Minor_Salivary_Gland	2.12846e-13	4.7537e-09
ENSG00000176125	ENSG00000176125:1	UFSP1	0.5356	Small_Intestine_Terminal_Ileum	2.12846e-13	4.7537e-09
ENSG00000176125	ENSG00000176125:1	UFSP1	0.543	Esophagus_Gastroesophageal_Junction	2.12846e-13	4.7537e-09
ENSG00000176125	ENSG00000176125:1	UFSP1	0.4502	Colon_Transverse	2.12846e-13	4.7537e-09
ENSG00000115825	ENSG00000115825:3	PRKD3	0.4174	Artery_Aorta	2.46244e-13	5.49961e-09
ENSG00000115825	ENSG00000115825:2	PRKD3	0.1762	Colon_Transverse	2.46244e-13	5.49961e-09
ENSG00000115825	ENSG00000115825:3	PRKD3	0.39	Nerve_Tibial	2.46244e-13	5.49961e-09
ENSG00000115825	ENSG00000115825:2	PRKD3	0.4618	Whole_Blood	2.46244e-13	5.49961e-09
ENSG00000115825	ENSG00000115825:2	PRKD3	0.4973	Adipose_Visceral_Omentum	2.46244e-13	5.49961e-09
ENSG00000115825	ENSG00000115825:3	PRKD3	0.1508	Esophagus_Mucosa	2.46244e-13	5.49961e-09
ENSG00000115825	ENSG00000115825:4	PRKD3	0.1256	Nerve_Tibial	2.46244e-13	5.49961e-09
ENSG00000115825	ENSG00000115825:2	PRKD3	0.2602	Stomach	2.46244e-13	5.49961e-09
ENSG00000278828	ENSG00000278828:1	HIST1H3H	0.1595	Esophagus_Muscularis	3.19726e-13	7.14076e-09
ENSG00000187772	ENSG00000187772:1	LIN28B	0.1488	Testis	3.34868e-13	7.47893e-09
ENSG00000187772	ENSG00000187772:1	LIN28B	0.1815	Brain_Nucleus_accumbens_basal_ganglia	3.34868e-13	7.47893e-09
ENSG00000187772	ENSG00000187772:1	LIN28B	0.3634	Pituitary	3.34868e-13	7.47893e-09
ENSG00000187772	ENSG00000187772:1	LIN28B	0.1931	Brain_Cortex	3.34868e-13	7.47893e-09
ENSG00000187772	ENSG00000187772:1	LIN28B	0.305	Brain_Hypothalamus	3.34868e-13	7.47893e-09
ENSG00000137449	ENSG00000137449:1	CPEB2	0.1209	Breast_Mammary_Tissue	3.79946e-13	8.48572e-09
ENSG00000137449	ENSG00000137449:1	CPEB2	0.3937	Skin_Sun_Exposed	3.79946e-13	8.48572e-09
ENSG00000137449	ENSG00000137449:1	CPEB2	0.4068	Esophagus_Muscularis	3.79946e-13	8.48572e-09
ENSG00000137449	ENSG00000137449:1	CPEB2	0.4422	Esophagus_Mucosa	3.79946e-13	8.48572e-09
ENSG00000137449	ENSG00000137449:1	CPEB2	0.336	Esophagus_Gastroesophageal_Junction	3.79946e-13	8.48572e-09
ENSG00000137449	ENSG00000137449:1	CPEB2	0.1027	Artery_Tibial	3.79946e-13	8.48572e-09
ENSG00000137449	ENSG00000137449:1	CPEB2	0.2957	Nerve_Tibial	3.79946e-13	8.48572e-09
ENSG00000137449	ENSG00000137449:2	CPEB2	0.2301	Skin_Not_Sun_Exposed	3.79946e-13	8.48572e-09
ENSG00000137449	ENSG00000137449:1	CPEB2	0.397	Whole_Blood	3.79946e-13	8.48572e-09
ENSG00000137449	ENSG00000137449:1	CPEB2	0.151	Spleen	3.79946e-13	8.48572e-09
ENSG00000109084	ENSG00000109084:1	TMEM97	0.1292	Brain_Putamen_basal_ganglia	4.04708e-13	9.03875e-09
ENSG00000109084	ENSG00000109084:1	TMEM97	0.1182	Spleen	4.04708e-13	9.03875e-09
ENSG00000175707	ENSG00000175707:1	KDF1	0.1071	Esophagus_Muscularis	8.77534e-13	1.95988e-08
ENSG00000141030	ENSG00000141030:1	COPS3	0.5661	Whole_Blood	1.14674e-12	2.56113e-08
ENSG00000141030	ENSG00000141030:1	COPS3	0.4507	Esophagus_Muscularis	1.14674e-12	2.56113e-08
ENSG00000141030	ENSG00000141030:1	COPS3	0.4635	Spleen	1.14674e-12	2.56113e-08
ENSG00000141030	ENSG00000141030:1	COPS3	0.1461	Pituitary	1.14674e-12	2.56113e-08
ENSG00000141030	ENSG00000141030:1	COPS3	0.174	Heart_Atrial_Appendage	1.14674e-12	2.56113e-08
ENSG00000141030	ENSG00000141030:1	COPS3	0.5292	Adipose_Subcutaneous	1.14674e-12	2.56113e-08
ENSG00000141030	ENSG00000141030:1	COPS3	0.5583	Artery_Aorta	1.14674e-12	2.56113e-08
ENSG00000141030	ENSG00000141030:1	COPS3	0.158	Esophagus_Gastroesophageal_Junction	1.14674e-12	2.56113e-08
ENSG00000141030	ENSG00000141030:1	COPS3	0.3864	Colon_Transverse	1.14674e-12	2.56113e-08
ENSG00000141030	ENSG00000141030:1	COPS3	0.4792	Artery_Tibial	1.14674e-12	2.56113e-08
ENSG00000141030	ENSG00000141030:1	COPS3	0.5196	Colon_Sigmoid	1.14674e-12	2.56113e-08
ENSG00000141030	ENSG00000141030:1	COPS3	0.1015	Stomach	1.14674e-12	2.56113e-08
ENSG00000141030	ENSG00000141030:1	COPS3	0.4581	Brain_Cortex	1.14674e-12	2.56113e-08
ENSG00000141030	ENSG00000141030:3	COPS3	0.1312	Muscle_Skeletal	1.14674e-12	2.56113e-08
ENSG00000141030	ENSG00000141030:1	COPS3	0.4041	Breast_Mammary_Tissue	1.14674e-12	2.56113e-08
ENSG00000141030	ENSG00000141030:2	COPS3	0.1179	Adipose_Visceral_Omentum	1.14674e-12	2.56113e-08
ENSG00000141030	ENSG00000141030:1	COPS3	0.1402	Testis	1.14674e-12	2.56113e-08
ENSG00000141030	ENSG00000141030:1	COPS3	0.3868	Cells_Cultured_fibroblasts	1.14674e-12	2.56113e-08
ENSG00000141030	ENSG00000141030:1	COPS3	0.1023	Brain_Spinal_cord_cervical_c-1	1.14674e-12	2.56113e-08
ENSG00000196504	ENSG00000196504:1	PRPF40A	0.3671	Cells_Cultured_fibroblasts	1.26506e-12	2.82537e-08
ENSG00000196504	ENSG00000196504:1	PRPF40A	0.303	Breast_Mammary_Tissue	1.26506e-12	2.82537e-08
ENSG00000196504	ENSG00000196504:1	PRPF40A	0.1965	Colon_Sigmoid	1.26506e-12	2.82537e-08
ENSG00000196504	ENSG00000196504:1	PRPF40A	0.2649	Nerve_Tibial	1.26506e-12	2.82537e-08
ENSG00000196504	ENSG00000196504:1	PRPF40A	0.3039	Esophagus_Mucosa	1.26506e-12	2.82537e-08
ENSG00000196504	ENSG00000196504:1	PRPF40A	0.1965	Brain_Spinal_cord_cervical_c-1	1.26506e-12	2.82537e-08
ENSG00000196504	ENSG00000196504:1	PRPF40A	0.1569	Spleen	1.26506e-12	2.82537e-08
ENSG00000196504	ENSG00000196504:1	PRPF40A	0.292	Thyroid	1.26506e-12	2.82537e-08
ENSG00000196504	ENSG00000196504:1	PRPF40A	0.2129	Small_Intestine_Terminal_Ileum	1.26506e-12	2.82537e-08
ENSG00000196504	ENSG00000196504:1	PRPF40A	0.2532	Esophagus_Gastroesophageal_Junction	1.26506e-12	2.82537e-08
ENSG00000196504	ENSG00000196504:1	PRPF40A	0.2141	Stomach	1.26506e-12	2.82537e-08
ENSG00000196504	ENSG00000196504:1	PRPF40A	0.3168	Lung	1.26506e-12	2.82537e-08
ENSG00000163823	ENSG00000163823:1	CCR1	0.1075	Lung	2.04611e-12	4.56978e-08
ENSG00000083720	ENSG00000083720:1	OXCT1	0.1052	Esophagus_Mucosa	2.14687e-12	4.79481e-08
ENSG00000083720	ENSG00000083720:1	OXCT1	0.1418	Colon_Sigmoid	2.14687e-12	4.79481e-08
ENSG00000083720	ENSG00000083720:1	OXCT1	0.1102	Adipose_Subcutaneous	2.14687e-12	4.79481e-08
ENSG00000083720	ENSG00000083720:1	OXCT1	0.157	Esophagus_Muscularis	2.14687e-12	4.79481e-08
ENSG00000172053	ENSG00000172053:1	QARS	0.1346	Esophagus_Mucosa	2.24162e-12	5.00643e-08
ENSG00000266074	ENSG00000266074:2	BAHCC1	0.2514	Cells_Cultured_fibroblasts	2.62564e-12	5.8641e-08
ENSG00000266074	ENSG00000266074:1	BAHCC1	0.1555	Stomach	2.62564e-12	5.8641e-08
ENSG00000131055	ENSG00000131055:1	COX4I2	0.2149	Brain_Putamen_basal_ganglia	3.31843e-12	7.41139e-08
ENSG00000131055	ENSG00000131055:1	COX4I2	0.2154	Brain_Cerebellar_Hemisphere	3.31843e-12	7.41139e-08
ENSG00000131055	ENSG00000131055:1	COX4I2	0.7949	Thyroid	3.31843e-12	7.41139e-08
ENSG00000131055	ENSG00000131055:1	COX4I2	0.5174	Vagina	3.31843e-12	7.41139e-08
ENSG00000131055	ENSG00000131055:1	COX4I2	0.4533	Ovary	3.31843e-12	7.41139e-08
ENSG00000131055	ENSG00000131055:1	COX4I2	0.363	Artery_Coronary	3.31843e-12	7.41139e-08
ENSG00000131055	ENSG00000131055:1	COX4I2	0.4828	Brain_Nucleus_accumbens_basal_ganglia	3.31843e-12	7.41139e-08
ENSG00000131055	ENSG00000131055:2	COX4I2	0.1156	Lung	3.31843e-12	7.41139e-08
ENSG00000131055	ENSG00000131055:1	COX4I2	0.1836	Brain_Substantia_nigra	3.31843e-12	7.41139e-08
ENSG00000131055	ENSG00000131055:1	COX4I2	0.2246	Brain_Cerebellum	3.31843e-12	7.41139e-08
ENSG00000131055	ENSG00000131055:1	COX4I2	0.2406	Adrenal_Gland	3.31843e-12	7.41139e-08
ENSG00000131055	ENSG00000131055:1	COX4I2	0.1145	Brain_Amygdala	3.31843e-12	7.41139e-08
ENSG00000131055	ENSG00000131055:1	COX4I2	0.5538	Prostate	3.31843e-12	7.41139e-08
ENSG00000131055	ENSG00000131055:1	COX4I2	0.4701	Colon_Transverse	3.31843e-12	7.41139e-08
ENSG00000131055	ENSG00000131055:1	COX4I2	0.7968	Muscle_Skeletal	3.31843e-12	7.41139e-08
ENSG00000131055	ENSG00000131055:1	COX4I2	0.722	Esophagus_Mucosa	3.31843e-12	7.41139e-08
ENSG00000131055	ENSG00000131055:1	COX4I2	0.6239	Esophagus_Gastroesophageal_Junction	3.31843e-12	7.41139e-08
ENSG00000131055	ENSG00000131055:1	COX4I2	0.7946	Esophagus_Muscularis	3.31843e-12	7.41139e-08
ENSG00000131055	ENSG00000131055:1	COX4I2	0.8184	Nerve_Tibial	3.31843e-12	7.41139e-08
ENSG00000131055	ENSG00000131055:1	COX4I2	0.7513	Skin_Not_Sun_Exposed	3.31843e-12	7.41139e-08
ENSG00000131055	ENSG00000131055:1	COX4I2	0.6437	Spleen	3.31843e-12	7.41139e-08
ENSG00000131055	ENSG00000131055:1	COX4I2	0.746	Heart_Left_Ventricle	3.31843e-12	7.41139e-08
ENSG00000131055	ENSG00000131055:1	COX4I2	0.7336	Colon_Sigmoid	3.31843e-12	7.41139e-08
ENSG00000131055	ENSG00000131055:1	COX4I2	0.6317	Adipose_Subcutaneous	3.31843e-12	7.41139e-08
ENSG00000131055	ENSG00000131055:1	COX4I2	0.6364	Small_Intestine_Terminal_Ileum	3.31843e-12	7.41139e-08
ENSG00000131055	ENSG00000131055:1	COX4I2	0.8196	Breast_Mammary_Tissue	3.31843e-12	7.41139e-08
ENSG00000131055	ENSG00000131055:1	COX4I2	0.4291	Pancreas	3.31843e-12	7.41139e-08
ENSG00000131055	ENSG00000131055:1	COX4I2	0.6473	Stomach	3.31843e-12	7.41139e-08
ENSG00000131055	ENSG00000131055:1	COX4I2	0.6942	Adipose_Visceral_Omentum	3.31843e-12	7.41139e-08
ENSG00000131055	ENSG00000131055:1	COX4I2	0.1072	Brain_Anterior_cingulate_cortex_BA24	3.31843e-12	7.41139e-08
ENSG00000131055	ENSG00000131055:1	COX4I2	0.2634	Liver	3.31843e-12	7.41139e-08
ENSG00000131055	ENSG00000131055:1	COX4I2	0.483	Brain_Hypothalamus	3.31843e-12	7.41139e-08
ENSG00000131055	ENSG00000131055:1	COX4I2	0.7528	Artery_Aorta	3.31843e-12	7.41139e-08
ENSG00000131055	ENSG00000131055:1	COX4I2	0.5957	Skin_Sun_Exposed	3.31843e-12	7.41139e-08
ENSG00000131055	ENSG00000131055:1	COX4I2	0.5061	Heart_Atrial_Appendage	3.31843e-12	7.41139e-08
ENSG00000131055	ENSG00000131055:1	COX4I2	0.6677	Lung	3.31843e-12	7.41139e-08
ENSG00000131055	ENSG00000131055:1	COX4I2	0.8174	Artery_Tibial	3.31843e-12	7.41139e-08
ENSG00000131055	ENSG00000131055:2	COX4I2	0.1141	Breast_Mammary_Tissue	3.31843e-12	7.41139e-08
ENSG00000131055	ENSG00000131055:1	COX4I2	0.3632	Pituitary	3.31843e-12	7.41139e-08
ENSG00000131055	ENSG00000131055:1	COX4I2	0.2393	Brain_Hippocampus	3.31843e-12	7.41139e-08
ENSG00000131055	ENSG00000131055:1	COX4I2	0.2488	Brain_Cortex	3.31843e-12	7.41139e-08
ENSG00000170430	ENSG00000170430:4	MGMT	0.5017	Skin_Not_Sun_Exposed	3.9227e-12	8.76095e-08
ENSG00000170430	ENSG00000170430:1	MGMT	0.1775	Brain_Hippocampus	3.9227e-12	8.76095e-08
ENSG00000170430	ENSG00000170430:4	MGMT	0.1246	Brain_Caudate_basal_ganglia	3.9227e-12	8.76095e-08
ENSG00000170430	ENSG00000170430:4	MGMT	0.2179	Breast_Mammary_Tissue	3.9227e-12	8.76095e-08
ENSG00000170430	ENSG00000170430:4	MGMT	0.1885	Brain_Nucleus_accumbens_basal_ganglia	3.9227e-12	8.76095e-08
ENSG00000170430	ENSG00000170430:4	MGMT	0.3875	Cells_Cultured_fibroblasts	3.9227e-12	8.76095e-08
ENSG00000171552	ENSG00000171552:1	BCL2L1	0.1331	Skin_Sun_Exposed	4.26542e-12	9.52639e-08
ENSG00000171552	ENSG00000171552:1	BCL2L1	0.2397	Brain_Frontal_Cortex_BA9	4.26542e-12	9.52639e-08
ENSG00000196411	ENSG00000196411:1	EPHB4	0.266	Muscle_Skeletal	4.75461e-12	1.06189e-07
ENSG00000214435	ENSG00000214435:1	AS3MT	0.2716	Artery_Coronary	5.21587e-12	1.16491e-07
ENSG00000214435	ENSG00000214435:1	AS3MT	0.2983	Artery_Aorta	5.21587e-12	1.16491e-07
ENSG00000214435	ENSG00000214435:1	AS3MT	0.2806	Brain_Amygdala	5.21587e-12	1.16491e-07
ENSG00000214435	ENSG00000214435:1	AS3MT	0.2906	Adipose_Subcutaneous	5.21587e-12	1.16491e-07
ENSG00000214435	ENSG00000214435:1	AS3MT	0.1437	Testis	5.21587e-12	1.16491e-07
ENSG00000214435	ENSG00000214435:2	AS3MT	0.1744	Prostate	5.21587e-12	1.16491e-07
ENSG00000214435	ENSG00000214435:1	AS3MT	0.2604	Nerve_Tibial	5.21587e-12	1.16491e-07
ENSG00000214435	ENSG00000214435:1	AS3MT	0.2839	Colon_Sigmoid	5.21587e-12	1.16491e-07
ENSG00000214435	ENSG00000214435:2	AS3MT	0.262	Esophagus_Muscularis	5.21587e-12	1.16491e-07
ENSG00000214435	ENSG00000214435:1	AS3MT	0.5805	Pancreas	5.21587e-12	1.16491e-07
ENSG00000214435	ENSG00000214435:2	AS3MT	0.3939	Whole_Blood	5.21587e-12	1.16491e-07
ENSG00000214435	ENSG00000214435:1	AS3MT	0.304	Adipose_Visceral_Omentum	5.21587e-12	1.16491e-07
ENSG00000214435	ENSG00000214435:2	AS3MT	0.2752	Esophagus_Gastroesophageal_Junction	5.21587e-12	1.16491e-07
ENSG00000214435	ENSG00000214435:1	AS3MT	0.3069	Artery_Tibial	5.21587e-12	1.16491e-07
ENSG00000214435	ENSG00000214435:1	AS3MT	0.1524	Brain_Nucleus_accumbens_basal_ganglia	5.21587e-12	1.16491e-07
ENSG00000214435	ENSG00000214435:3	AS3MT	0.1612	Esophagus_Mucosa	5.21587e-12	1.16491e-07
ENSG00000214435	ENSG00000214435:1	AS3MT	0.2825	Lung	5.21587e-12	1.16491e-07
ENSG00000214435	ENSG00000214435:1	AS3MT	0.3062	Breast_Mammary_Tissue	5.21587e-12	1.16491e-07
ENSG00000214435	ENSG00000214435:1	AS3MT	0.2383	Brain_Cortex	5.21587e-12	1.16491e-07
ENSG00000214435	ENSG00000214435:1	AS3MT	0.2242	Colon_Transverse	5.21587e-12	1.16491e-07
ENSG00000214435	ENSG00000214435:1	AS3MT	0.2928	Cells_Cultured_fibroblasts	5.21587e-12	1.16491e-07
ENSG00000214435	ENSG00000214435:1	AS3MT	0.2435	Vagina	5.21587e-12	1.16491e-07
ENSG00000214435	ENSG00000214435:2	AS3MT	0.2383	Uterus	5.21587e-12	1.16491e-07
ENSG00000214435	ENSG00000214435:1	AS3MT	0.2471	Heart_Left_Ventricle	5.21587e-12	1.16491e-07
ENSG00000214435	ENSG00000214435:1	AS3MT	0.2083	Brain_Hippocampus	5.21587e-12	1.16491e-07
ENSG00000214435	ENSG00000214435:1	AS3MT	0.2211	Heart_Atrial_Appendage	5.21587e-12	1.16491e-07
ENSG00000214435	ENSG00000214435:1	AS3MT	0.2632	Liver	5.21587e-12	1.16491e-07
ENSG00000214435	ENSG00000214435:3	AS3MT	0.2868	Muscle_Skeletal	5.21587e-12	1.16491e-07
ENSG00000087157	ENSG00000087157:2	PGS1	0.2189	Cells_Cultured_fibroblasts	5.21854e-12	1.16551e-07
ENSG00000087157	ENSG00000087157:2	PGS1	0.1107	Brain_Cerebellar_Hemisphere	5.21854e-12	1.16551e-07
ENSG00000087157	ENSG00000087157:1	PGS1	0.2062	Brain_Anterior_cingulate_cortex_BA24	5.21854e-12	1.16551e-07
ENSG00000087157	ENSG00000087157:2	PGS1	0.409	Brain_Caudate_basal_ganglia	5.21854e-12	1.16551e-07
ENSG00000187583	ENSG00000187583:1	PLEKHN1	0.8887	Artery_Tibial	5.84466e-12	1.30535e-07
ENSG00000187583	ENSG00000187583:2	PLEKHN1	0.3141	Adipose_Subcutaneous	5.84466e-12	1.30535e-07
ENSG00000187583	ENSG00000187583:1	PLEKHN1	0.7314	Stomach	5.84466e-12	1.30535e-07
ENSG00000187583	ENSG00000187583:1	PLEKHN1	0.893	Cells_Cultured_fibroblasts	5.84466e-12	1.30535e-07
ENSG00000187583	ENSG00000187583:1	PLEKHN1	0.884	Adrenal_Gland	5.84466e-12	1.30535e-07
ENSG00000187583	ENSG00000187583:1	PLEKHN1	0.2722	Artery_Coronary	5.84466e-12	1.30535e-07
ENSG00000187583	ENSG00000187583:2	PLEKHN1	0.4521	Nerve_Tibial	5.84466e-12	1.30535e-07
ENSG00000187583	ENSG00000187583:1	PLEKHN1	0.374	Breast_Mammary_Tissue	5.84466e-12	1.30535e-07
ENSG00000141429	ENSG00000141429:1	GALNT1	0.1778	Artery_Tibial	6.14125e-12	1.37159e-07
ENSG00000276368	ENSG00000276368:1	HIST1H2AJ	0.1125	Cells_Cultured_fibroblasts	6.20436e-12	1.38568e-07
ENSG00000276368	ENSG00000276368:1	HIST1H2AJ	0.1039	Spleen	6.20436e-12	1.38568e-07
ENSG00000154803	ENSG00000154803:1	FLCN	0.3174	Minor_Salivary_Gland	6.87888e-12	1.53633e-07
ENSG00000154803	ENSG00000154803:1	FLCN	0.303	Heart_Left_Ventricle	6.87888e-12	1.53633e-07
ENSG00000154803	ENSG00000154803:1	FLCN	0.257	Thyroid	6.87888e-12	1.53633e-07
ENSG00000154803	ENSG00000154803:1	FLCN	0.3464	Adipose_Visceral_Omentum	6.87888e-12	1.53633e-07
ENSG00000154803	ENSG00000154803:1	FLCN	0.2117	Brain_Cerebellum	6.87888e-12	1.53633e-07
ENSG00000154803	ENSG00000154803:1	FLCN	0.3485	Breast_Mammary_Tissue	6.87888e-12	1.53633e-07
ENSG00000154803	ENSG00000154803:1	FLCN	0.3143	Esophagus_Gastroesophageal_Junction	6.87888e-12	1.53633e-07
ENSG00000154803	ENSG00000154803:2	FLCN	0.3949	Thyroid	6.87888e-12	1.53633e-07
ENSG00000154803	ENSG00000154803:1	FLCN	0.3016	Esophagus_Muscularis	6.87888e-12	1.53633e-07
ENSG00000154803	ENSG00000154803:1	FLCN	0.3234	Spleen	6.87888e-12	1.53633e-07
ENSG00000154803	ENSG00000154803:1	FLCN	0.3162	Prostate	6.87888e-12	1.53633e-07
ENSG00000154803	ENSG00000154803:1	FLCN	0.3344	Cells_Cultured_fibroblasts	6.87888e-12	1.53633e-07
ENSG00000154803	ENSG00000154803:1	FLCN	0.3009	Nerve_Tibial	6.87888e-12	1.53633e-07
ENSG00000154803	ENSG00000154803:1	FLCN	0.3162	Pancreas	6.87888e-12	1.53633e-07
ENSG00000154803	ENSG00000154803:1	FLCN	0.2968	Colon_Transverse	6.87888e-12	1.53633e-07
ENSG00000154803	ENSG00000154803:1	FLCN	0.3388	Artery_Aorta	6.87888e-12	1.53633e-07
ENSG00000154803	ENSG00000154803:1	FLCN	0.2661	Heart_Atrial_Appendage	6.87888e-12	1.53633e-07
ENSG00000154803	ENSG00000154803:1	FLCN	0.3099	Brain_Frontal_Cortex_BA9	6.87888e-12	1.53633e-07
ENSG00000154803	ENSG00000154803:3	FLCN	0.3788	Adipose_Subcutaneous	6.87888e-12	1.53633e-07
ENSG00000154803	ENSG00000154803:1	FLCN	0.5008	Brain_Hypothalamus	6.87888e-12	1.53633e-07
ENSG00000154803	ENSG00000154803:1	FLCN	0.1874	Testis	6.87888e-12	1.53633e-07
ENSG00000154803	ENSG00000154803:1	FLCN	0.2947	Pituitary	6.87888e-12	1.53633e-07
ENSG00000154803	ENSG00000154803:1	FLCN	0.3348	Adipose_Subcutaneous	6.87888e-12	1.53633e-07
ENSG00000154803	ENSG00000154803:1	FLCN	0.2708	Esophagus_Mucosa	6.87888e-12	1.53633e-07
ENSG00000154803	ENSG00000154803:2	FLCN	0.1004	Brain_Hippocampus	6.87888e-12	1.53633e-07
ENSG00000154803	ENSG00000154803:1	FLCN	0.3306	Stomach	6.87888e-12	1.53633e-07
ENSG00000154803	ENSG00000154803:1	FLCN	0.2129	Brain_Cerebellar_Hemisphere	6.87888e-12	1.53633e-07
ENSG00000154803	ENSG00000154803:1	FLCN	0.3014	Skin_Not_Sun_Exposed	6.87888e-12	1.53633e-07
ENSG00000154803	ENSG00000154803:1	FLCN	0.1016	Brain_Substantia_nigra	6.87888e-12	1.53633e-07
ENSG00000154803	ENSG00000154803:1	FLCN	0.2496	Uterus	6.87888e-12	1.53633e-07
ENSG00000154803	ENSG00000154803:1	FLCN	0.3485	Artery_Tibial	6.87888e-12	1.53633e-07
ENSG00000154803	ENSG00000154803:1	FLCN	0.2761	Brain_Cortex	6.87888e-12	1.53633e-07
ENSG00000154803	ENSG00000154803:1	FLCN	0.6849	Cells_EBV-transformed_lymphocytes	6.87888e-12	1.53633e-07
ENSG00000154803	ENSG00000154803:1	FLCN	0.2462	Brain_Nucleus_accumbens_basal_ganglia	6.87888e-12	1.53633e-07
ENSG00000154803	ENSG00000154803:1	FLCN	0.3302	Muscle_Skeletal	6.87888e-12	1.53633e-07
ENSG00000154803	ENSG00000154803:1	FLCN	0.2188	Kidney_Cortex	6.87888e-12	1.53633e-07
ENSG00000154803	ENSG00000154803:1	FLCN	0.3	Ovary	6.87888e-12	1.53633e-07
ENSG00000154803	ENSG00000154803:1	FLCN	0.3245	Colon_Sigmoid	6.87888e-12	1.53633e-07
ENSG00000154803	ENSG00000154803:1	FLCN	0.2994	Small_Intestine_Terminal_Ileum	6.87888e-12	1.53633e-07
ENSG00000154803	ENSG00000154803:1	FLCN	0.6554	Adrenal_Gland	6.87888e-12	1.53633e-07
ENSG00000154803	ENSG00000154803:1	FLCN	0.3219	Lung	6.87888e-12	1.53633e-07
ENSG00000154803	ENSG00000154803:1	FLCN	0.1016	Brain_Anterior_cingulate_cortex_BA24	6.87888e-12	1.53633e-07
ENSG00000154803	ENSG00000154803:1	FLCN	0.251	Brain_Putamen_basal_ganglia	6.87888e-12	1.53633e-07
ENSG00000154803	ENSG00000154803:1	FLCN	0.3115	Artery_Coronary	6.87888e-12	1.53633e-07
ENSG00000154803	ENSG00000154803:1	FLCN	0.4171	Brain_Spinal_cord_cervical_c-1	6.87888e-12	1.53633e-07
ENSG00000154803	ENSG00000154803:1	FLCN	0.2379	Vagina	6.87888e-12	1.53633e-07
ENSG00000154803	ENSG00000154803:1	FLCN	0.5412	Liver	6.87888e-12	1.53633e-07
ENSG00000154803	ENSG00000154803:1	FLCN	0.2553	Brain_Caudate_basal_ganglia	6.87888e-12	1.53633e-07
ENSG00000154803	ENSG00000154803:1	FLCN	0.2129	Brain_Amygdala	6.87888e-12	1.53633e-07
ENSG00000154803	ENSG00000154803:1	FLCN	0.2901	Skin_Sun_Exposed	6.87888e-12	1.53633e-07
ENSG00000239887	ENSG00000239887:1	C1orf226	0.1769	Esophagus_Muscularis	7.09852e-12	1.58538e-07
ENSG00000239887	ENSG00000239887:1	C1orf226	0.1147	Esophagus_Gastroesophageal_Junction	7.09852e-12	1.58538e-07
ENSG00000164440	ENSG00000164440:1	TXLNB	0.4518	Colon_Sigmoid	7.32663e-12	1.63633e-07
ENSG00000164440	ENSG00000164440:1	TXLNB	0.109	Adrenal_Gland	7.32663e-12	1.63633e-07
ENSG00000184357	ENSG00000184357:2	HIST1H1B	0.1407	Skin_Not_Sun_Exposed	8.5421e-12	1.90779e-07
ENSG00000184357	ENSG00000184357:1	HIST1H1B	0.1134	Skin_Not_Sun_Exposed	8.5421e-12	1.90779e-07
ENSG00000184357	ENSG00000184357:1	HIST1H1B	0.1136	Cells_EBV-transformed_lymphocytes	8.5421e-12	1.90779e-07
ENSG00000172059	ENSG00000172059:1	KLF11	0.6869	Heart_Left_Ventricle	8.61374e-12	1.92379e-07
ENSG00000172059	ENSG00000172059:1	KLF11	0.2646	Artery_Aorta	8.61374e-12	1.92379e-07
ENSG00000172059	ENSG00000172059:2	KLF11	0.1554	Brain_Frontal_Cortex_BA9	8.61374e-12	1.92379e-07
ENSG00000172059	ENSG00000172059:2	KLF11	0.2175	Brain_Cortex	8.61374e-12	1.92379e-07
ENSG00000172059	ENSG00000172059:1	KLF11	0.6439	Brain_Cerebellum	8.61374e-12	1.92379e-07
ENSG00000109472	ENSG00000109472:2	CPE	0.1933	Esophagus_Mucosa	1.06154e-11	2.37085e-07
ENSG00000109472	ENSG00000109472:1	CPE	0.9052	Liver	1.06154e-11	2.37085e-07
ENSG00000163251	ENSG00000163251:1	FZD5	0.1039	Brain_Cortex	1.06559e-11	2.3799e-07
ENSG00000163251	ENSG00000163251:1	FZD5	0.3543	Esophagus_Gastroesophageal_Junction	1.06559e-11	2.3799e-07
ENSG00000170876	ENSG00000170876:1	TMEM43	0.3527	Brain_Frontal_Cortex_BA9	1.1922e-11	2.66266e-07
ENSG00000170876	ENSG00000170876:1	TMEM43	0.4354	Brain_Caudate_basal_ganglia	1.1922e-11	2.66266e-07
ENSG00000170876	ENSG00000170876:1	TMEM43	0.8449	Thyroid	1.1922e-11	2.66266e-07
ENSG00000170876	ENSG00000170876:1	TMEM43	0.5362	Spleen	1.1922e-11	2.66266e-07
ENSG00000170876	ENSG00000170876:2	TMEM43	0.1151	Brain_Cerebellum	1.1922e-11	2.66266e-07
ENSG00000170876	ENSG00000170876:1	TMEM43	0.2675	Skin_Sun_Exposed	1.1922e-11	2.66266e-07
ENSG00000170876	ENSG00000170876:1	TMEM43	0.1103	Adrenal_Gland	1.1922e-11	2.66266e-07
ENSG00000170876	ENSG00000170876:2	TMEM43	0.7157	Whole_Blood	1.1922e-11	2.66266e-07
ENSG00000170876	ENSG00000170876:1	TMEM43	0.1558	Adipose_Visceral_Omentum	1.1922e-11	2.66266e-07
ENSG00000170876	ENSG00000170876:2	TMEM43	0.3485	Pancreas	1.1922e-11	2.66266e-07
ENSG00000170876	ENSG00000170876:1	TMEM43	0.256	Brain_Nucleus_accumbens_basal_ganglia	1.1922e-11	2.66266e-07
ENSG00000170876	ENSG00000170876:2	TMEM43	0.3293	Muscle_Skeletal	1.1922e-11	2.66266e-07
ENSG00000179833	ENSG00000179833:1	SERTAD2	0.7424	Muscle_Skeletal	1.26894e-11	2.83406e-07
ENSG00000179833	ENSG00000179833:2	SERTAD2	0.2	Esophagus_Gastroesophageal_Junction	1.26894e-11	2.83406e-07
ENSG00000179833	ENSG00000179833:1	SERTAD2	0.1612	Artery_Coronary	1.26894e-11	2.83406e-07
ENSG00000179833	ENSG00000179833:1	SERTAD2	0.6054	Esophagus_Muscularis	1.26894e-11	2.83406e-07
ENSG00000179833	ENSG00000179833:1	SERTAD2	0.6248	Adipose_Subcutaneous	1.26894e-11	2.83406e-07
ENSG00000179833	ENSG00000179833:1	SERTAD2	0.6311	Whole_Blood	1.26894e-11	2.83406e-07
ENSG00000179833	ENSG00000179833:1	SERTAD2	0.2511	Nerve_Tibial	1.26894e-11	2.83406e-07
ENSG00000179833	ENSG00000179833:1	SERTAD2	0.6329	Adipose_Visceral_Omentum	1.26894e-11	2.83406e-07
ENSG00000198961	ENSG00000198961:1	PJA2	0.1856	Adipose_Visceral_Omentum	1.33363e-11	2.97854e-07
ENSG00000198961	ENSG00000198961:1	PJA2	0.1915	Liver	1.33363e-11	2.97854e-07
ENSG00000198961	ENSG00000198961:1	PJA2	0.1447	Nerve_Tibial	1.33363e-11	2.97854e-07
ENSG00000198961	ENSG00000198961:1	PJA2	0.2626	Stomach	1.33363e-11	2.97854e-07
ENSG00000198961	ENSG00000198961:1	PJA2	0.2745	Heart_Left_Ventricle	1.33363e-11	2.97854e-07
ENSG00000198961	ENSG00000198961:1	PJA2	0.4573	Artery_Tibial	1.33363e-11	2.97854e-07
ENSG00000198961	ENSG00000198961:1	PJA2	0.1905	Thyroid	1.33363e-11	2.97854e-07
ENSG00000198961	ENSG00000198961:1	PJA2	0.2031	Adrenal_Gland	1.33363e-11	2.97854e-07
ENSG00000198961	ENSG00000198961:1	PJA2	0.4101	Adipose_Subcutaneous	1.33363e-11	2.97854e-07
ENSG00000198961	ENSG00000198961:1	PJA2	0.4903	Pancreas	1.33363e-11	2.97854e-07
ENSG00000198961	ENSG00000198961:1	PJA2	0.4471	Whole_Blood	1.33363e-11	2.97854e-07
ENSG00000198961	ENSG00000198961:1	PJA2	0.2663	Colon_Transverse	1.33363e-11	2.97854e-07
ENSG00000198961	ENSG00000198961:1	PJA2	0.3335	Breast_Mammary_Tissue	1.33363e-11	2.97854e-07
ENSG00000198961	ENSG00000198961:1	PJA2	0.1689	Artery_Aorta	1.33363e-11	2.97854e-07
ENSG00000151704	ENSG00000151704:1	KCNJ1	0.3745	Small_Intestine_Terminal_Ileum	1.39261e-11	3.11026e-07
ENSG00000151704	ENSG00000151704:1	KCNJ1	0.1634	Colon_Transverse	1.39261e-11	3.11026e-07
ENSG00000151704	ENSG00000151704:1	KCNJ1	0.2781	Breast_Mammary_Tissue	1.39261e-11	3.11026e-07
ENSG00000151704	ENSG00000151704:1	KCNJ1	0.2173	Artery_Tibial	1.39261e-11	3.11026e-07
ENSG00000160256	ENSG00000160256:2	FAM207A	0.1618	Cells_EBV-transformed_lymphocytes	1.77837e-11	3.97182e-07
ENSG00000160256	ENSG00000160256:2	FAM207A	0.7592	Esophagus_Muscularis	1.77837e-11	3.97182e-07
ENSG00000160256	ENSG00000160256:3	FAM207A	0.1408	Nerve_Tibial	1.77837e-11	3.97182e-07
ENSG00000160256	ENSG00000160256:2	FAM207A	0.4181	Skin_Sun_Exposed	1.77837e-11	3.97182e-07
ENSG00000160256	ENSG00000160256:2	FAM207A	0.6049	Adipose_Subcutaneous	1.77837e-11	3.97182e-07
ENSG00000160256	ENSG00000160256:3	FAM207A	0.8865	Colon_Transverse	1.77837e-11	3.97182e-07
ENSG00000180447	ENSG00000180447:1	GAS1	0.2713	Brain_Nucleus_accumbens_basal_ganglia	1.89379e-11	4.2296e-07
ENSG00000002919	ENSG00000002919:2	SNX11	0.1296	Brain_Frontal_Cortex_BA9	2.40924e-11	5.38079e-07
ENSG00000198929	ENSG00000198929:1	NOS1AP	0.3004	Adipose_Visceral_Omentum	2.48555e-11	5.55123e-07
ENSG00000107186	ENSG00000107186:3	MPDZ	0.1033	Cells_Cultured_fibroblasts	2.91665e-11	6.51405e-07
ENSG00000107186	ENSG00000107186:1	MPDZ	0.7121	Thyroid	2.91665e-11	6.51405e-07
ENSG00000154767	ENSG00000154767:1	XPC	0.2018	Breast_Mammary_Tissue	3.462e-11	7.73202e-07
ENSG00000154767	ENSG00000154767:3	XPC	0.1163	Stomach	3.462e-11	7.73202e-07
ENSG00000154767	ENSG00000154767:1	XPC	0.1427	Whole_Blood	3.462e-11	7.73202e-07
ENSG00000138468	ENSG00000138468:2	SENP7	0.1176	Nerve_Tibial	3.79969e-11	8.48622e-07
ENSG00000138468	ENSG00000138468:2	SENP7	0.1167	Adipose_Subcutaneous	3.79969e-11	8.48622e-07
ENSG00000138468	ENSG00000138468:1	SENP7	0.1852	Whole_Blood	3.79969e-11	8.48622e-07
ENSG00000138468	ENSG00000138468:1	SENP7	0.1039	Pancreas	3.79969e-11	8.48622e-07
ENSG00000185499	ENSG00000185499:1	MUC1	0.1296	Brain_Hypothalamus	4.15403e-11	9.27761e-07
ENSG00000185499	ENSG00000185499:1	MUC1	0.1145	Brain_Cortex	4.15403e-11	9.27761e-07
ENSG00000185499	ENSG00000185499:1	MUC1	0.1744	Pancreas	4.15403e-11	9.27761e-07
ENSG00000185499	ENSG00000185499:2	MUC1	0.2532	Adipose_Visceral_Omentum	4.15403e-11	9.27761e-07
ENSG00000185499	ENSG00000185499:2	MUC1	0.1783	Spleen	4.15403e-11	9.27761e-07
ENSG00000185499	ENSG00000185499:1	MUC1	0.1752	Thyroid	4.15403e-11	9.27761e-07
ENSG00000185499	ENSG00000185499:1	MUC1	0.1057	Esophagus_Gastroesophageal_Junction	4.15403e-11	9.27761e-07
ENSG00000185499	ENSG00000185499:1	MUC1	0.241	Esophagus_Mucosa	4.15403e-11	9.27761e-07
ENSG00000185499	ENSG00000185499:1	MUC1	0.1444	Adipose_Subcutaneous	4.15403e-11	9.27761e-07
ENSG00000185499	ENSG00000185499:1	MUC1	0.3676	Testis	4.15403e-11	9.27761e-07
ENSG00000185499	ENSG00000185499:2	MUC1	0.1791	Skin_Sun_Exposed	4.15403e-11	9.27761e-07
ENSG00000185499	ENSG00000185499:2	MUC1	0.1165	Artery_Tibial	4.15403e-11	9.27761e-07
ENSG00000185499	ENSG00000185499:1	MUC1	0.1283	Artery_Coronary	4.15403e-11	9.27761e-07
ENSG00000185499	ENSG00000185499:2	MUC1	0.169	Cells_Cultured_fibroblasts	4.15403e-11	9.27761e-07
ENSG00000101294	ENSG00000101294:1	HM13	0.1772	Esophagus_Mucosa	4.55924e-11	1.01826e-06
ENSG00000185651	ENSG00000185651:1	UBE2L3	0.45	Whole_Blood	4.70791e-11	1.05146e-06
ENSG00000185651	ENSG00000185651:1	UBE2L3	0.3035	Thyroid	4.70791e-11	1.05146e-06
ENSG00000185651	ENSG00000185651:1	UBE2L3	0.1316	Pituitary	4.70791e-11	1.05146e-06
ENSG00000185651	ENSG00000185651:1	UBE2L3	0.1216	Brain_Substantia_nigra	4.70791e-11	1.05146e-06
ENSG00000185651	ENSG00000185651:1	UBE2L3	0.1266	Brain_Cerebellar_Hemisphere	4.70791e-11	1.05146e-06
ENSG00000185651	ENSG00000185651:1	UBE2L3	0.1133	Brain_Amygdala	4.70791e-11	1.05146e-06
ENSG00000185651	ENSG00000185651:1	UBE2L3	0.3618	Nerve_Tibial	4.70791e-11	1.05146e-06
ENSG00000185651	ENSG00000185651:1	UBE2L3	0.3461	Heart_Left_Ventricle	4.70791e-11	1.05146e-06
ENSG00000185651	ENSG00000185651:1	UBE2L3	0.2756	Brain_Frontal_Cortex_BA9	4.70791e-11	1.05146e-06
ENSG00000185651	ENSG00000185651:1	UBE2L3	0.3052	Brain_Caudate_basal_ganglia	4.70791e-11	1.05146e-06
ENSG00000185651	ENSG00000185651:1	UBE2L3	0.3778	Esophagus_Muscularis	4.70791e-11	1.05146e-06
ENSG00000185651	ENSG00000185651:1	UBE2L3	0.279	Esophagus_Mucosa	4.70791e-11	1.05146e-06
ENSG00000185651	ENSG00000185651:1	UBE2L3	0.2989	Adrenal_Gland	4.70791e-11	1.05146e-06
ENSG00000185651	ENSG00000185651:1	UBE2L3	0.4102	Artery_Tibial	4.70791e-11	1.05146e-06
ENSG00000185651	ENSG00000185651:1	UBE2L3	0.1106	Breast_Mammary_Tissue	4.70791e-11	1.05146e-06
ENSG00000185651	ENSG00000185651:1	UBE2L3	0.3661	Spleen	4.70791e-11	1.05146e-06
ENSG00000185651	ENSG00000185651:1	UBE2L3	0.3954	Skin_Sun_Exposed	4.70791e-11	1.05146e-06
ENSG00000185651	ENSG00000185651:1	UBE2L3	0.1007	Lung	4.70791e-11	1.05146e-06
ENSG00000185651	ENSG00000185651:1	UBE2L3	0.3101	Heart_Atrial_Appendage	4.70791e-11	1.05146e-06
ENSG00000185651	ENSG00000185651:1	UBE2L3	0.2461	Testis	4.70791e-11	1.05146e-06
ENSG00000185651	ENSG00000185651:1	UBE2L3	0.2958	Brain_Anterior_cingulate_cortex_BA24	4.70791e-11	1.05146e-06
ENSG00000185651	ENSG00000185651:1	UBE2L3	0.2639	Colon_Transverse	4.70791e-11	1.05146e-06
ENSG00000185651	ENSG00000185651:1	UBE2L3	0.3949	Muscle_Skeletal	4.70791e-11	1.05146e-06
ENSG00000185651	ENSG00000185651:1	UBE2L3	0.1454	Small_Intestine_Terminal_Ileum	4.70791e-11	1.05146e-06
ENSG00000185651	ENSG00000185651:1	UBE2L3	0.1479	Brain_Hippocampus	4.70791e-11	1.05146e-06
ENSG00000185651	ENSG00000185651:1	UBE2L3	0.1549	Colon_Sigmoid	4.70791e-11	1.05146e-06
ENSG00000185651	ENSG00000185651:1	UBE2L3	0.336	Brain_Cortex	4.70791e-11	1.05146e-06
ENSG00000185651	ENSG00000185651:2	UBE2L3	0.3144	Skin_Sun_Exposed	4.70791e-11	1.05146e-06
ENSG00000185651	ENSG00000185651:1	UBE2L3	0.3983	Artery_Aorta	4.70791e-11	1.05146e-06
ENSG00000185651	ENSG00000185651:1	UBE2L3	0.378	Adipose_Subcutaneous	4.70791e-11	1.05146e-06
ENSG00000088325	ENSG00000088325:1	TPX2	0.2031	Testis	4.8361e-11	1.08009e-06
ENSG00000087077	ENSG00000087077:2	TRIP6	0.3221	Stomach	5.28226e-11	1.17974e-06
[truncated: 1,703 more rows]

## Sheet: 1d
GTEx Tissue	Number of unique colocalizing genes
[truncated: 49 more rows]

[truncated: 6 more sheets: 1e, 1f, 1g, 1h, 1i, 1j]
