# Supplementary figures and images for: Transcriptome-wide association study and eQTL colocalization identify potentially causal genes responsible for human bone mineral density GWAS associations
Source: eLife journal article supplement (doi:10.7554/elife.77285), 2022-11-17

Fig4B Blots

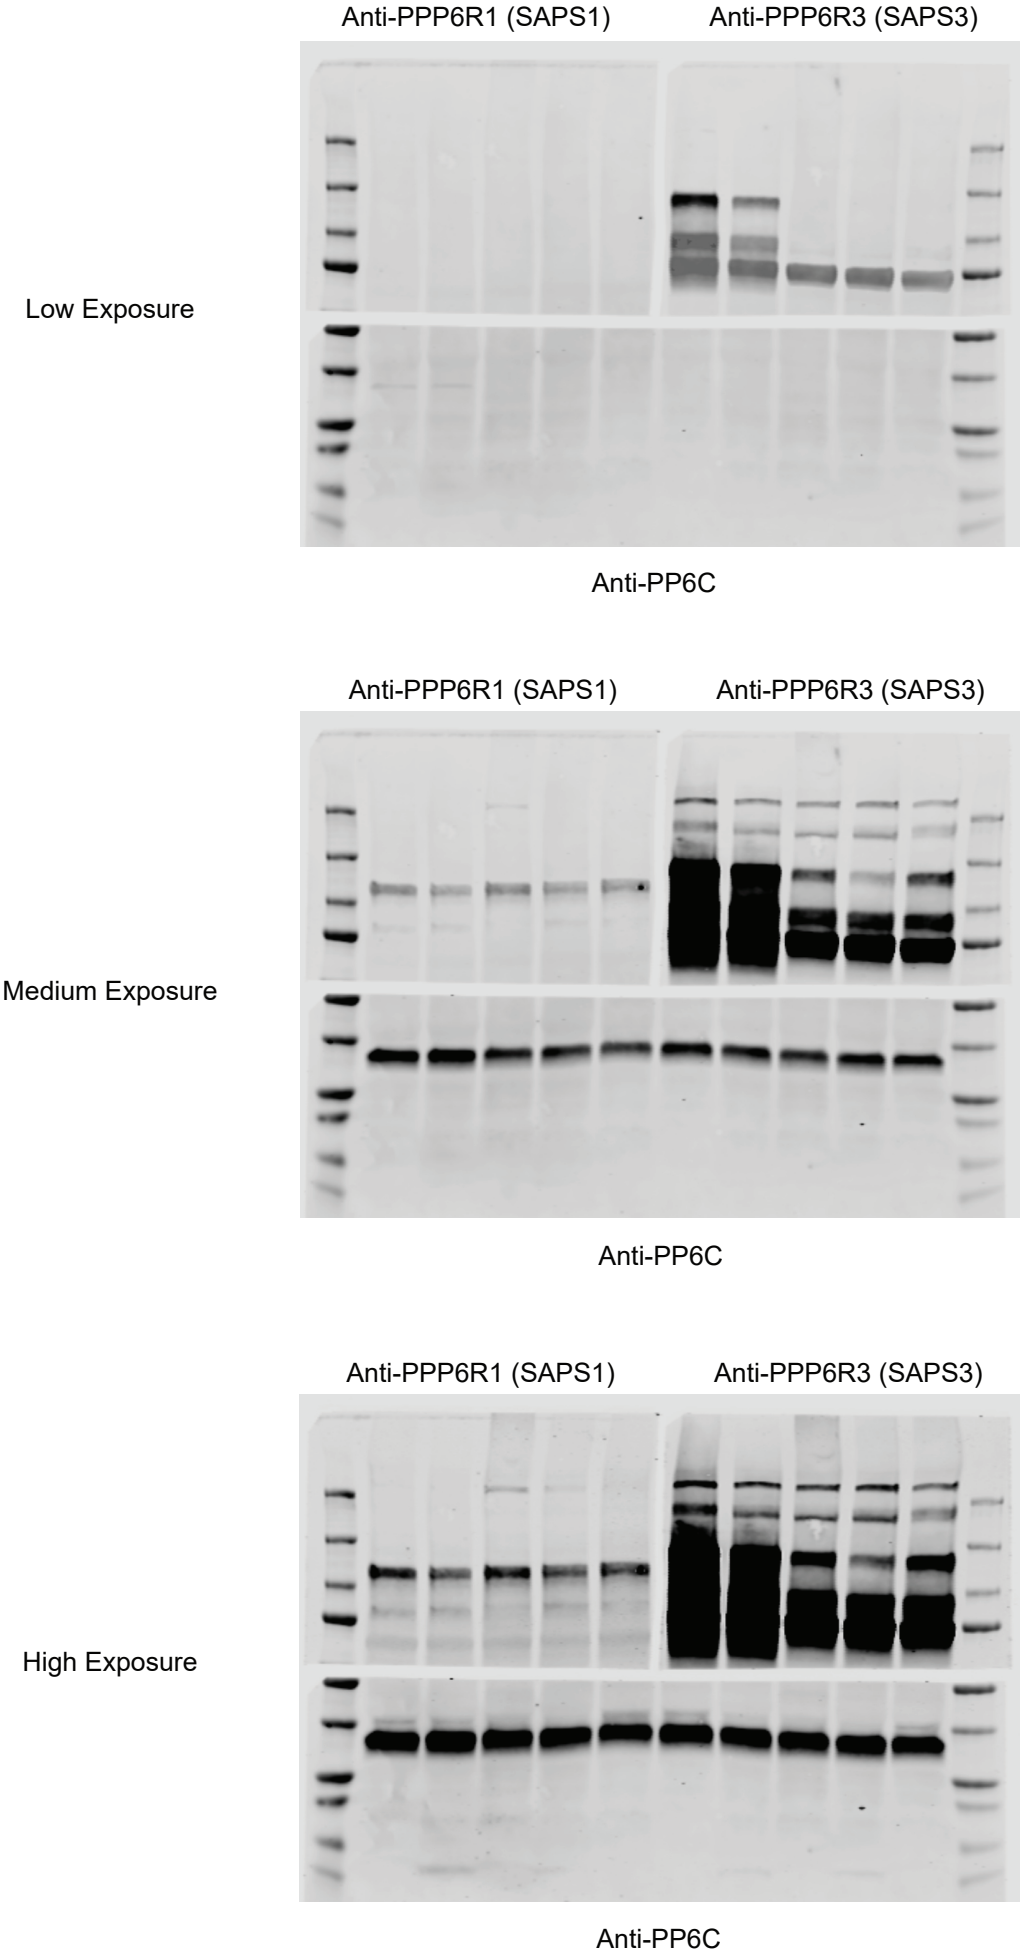

Supplement: fig4-data1 [file Figure 4-source data 1.pdf › Figure 4-source data 1.pdf]
